# Supplementary material
Source: publisher site journal article supplement (https://www.dovepress.com/get_supplementary_file.php?f=497476.xlsx)
Supplement: Supplementary file 1 [file get_supplementary_file.php]

## Sheet: Supplement Table 1
Supplement Table 1. Characteristics of the genetic instrumental variables used in the 2 sample MR analysis
SNP	other_allele.exposure	effect_allele.exposure	beta.exposure	se.exposure	pval.exposure	samplesize.exposure	exposure	F statistic	R2
rs10226722	T	C	0.1184	0.0256	3.84e-06	3658	IgD+ B cell %B cell	21.3789	0.00581363
rs11068290	C	T	0.3904	0.08097	1.49e-06	3658	IgD+ B cell %B cell	23.2345	0.00631504
rs138919897	A	G	1.402	0.2997	2.99e-06	3658	IgD+ B cell %B cell	21.8718	0.00594687
rs140191306	C	T	0.4421	0.09364	2.43e-06	3658	IgD+ B cell %B cell	22.2782	0.0060567
rs2450220	C	T	-0.152	0.03167	1.65e-06	3658	IgD+ B cell %B cell	23.0226	0.00625779
rs4691917	A	G	0.9378	0.1877	6.1e-07	3658	IgD+ B cell %B cell	24.9491	0.00677789
rs62057183	C	T	0.1273	0.02872	9.63e-06	3658	IgD+ B cell %B cell	19.6359	0.00534217
rs72757888	C	T	0.5864	0.1201	1.09e-06	3658	IgD+ B cell %B cell	23.8267	0.00647496
rs73426855	T	C	-0.174	0.03482	6.08e-07	3658	IgD+ B cell %B cell	24.9576	0.0067802
rs7597061	T	G	0.1829	0.04129	9.67e-06	3658	IgD+ B cell %B cell	19.611	0.00533544
rs9265870	A	G	0.1454	0.03049	1.92e-06	3658	IgD+ B cell %B cell	22.7288	0.00617844
rs10882701	A	C	-0.3962	0.02472	8.03e-56	3437	CD39+ secreting CD4 regulatory T cell %CD4 regulatory T cell	256.732	0.0695423
rs111461378	T	C	-1.062	0.2356	6.75e-06	3437	CD39+ secreting CD4 regulatory T cell %CD4 regulatory T cell	20.307	0.00587705
rs115364130	G	A	-0.4063	0.0857	2.21e-06	3437	CD39+ secreting CD4 regulatory T cell %CD4 regulatory T cell	22.4636	0.00649713
rs117200502	C	T	0.4056	0.04033	1.8e-23	3437	CD39+ secreting CD4 regulatory T cell %CD4 regulatory T cell	101.085	0.0285867
rs118006237	G	A	1.921	0.4076	2.53e-06	3437	CD39+ secreting CD4 regulatory T cell %CD4 regulatory T cell	22.199	0.0064211
rs11930070	G	A	-0.5873	0.131	7.56e-06	3437	CD39+ secreting CD4 regulatory T cell %CD4 regulatory T cell	20.0874	0.00581387
rs12778618	T	C	0.4055	0.06172	5.8e-11	3437	CD39+ secreting CD4 regulatory T cell %CD4 regulatory T cell	43.1397	0.0124031
rs145557266	A	G	0.7299	0.08928	4.09e-16	3437	CD39+ secreting CD4 regulatory T cell %CD4 regulatory T cell	66.7983	0.0190754
rs17571942	T	G	1.694	0.3658	3.77e-06	3437	CD39+ secreting CD4 regulatory T cell %CD4 regulatory T cell	21.4332	0.00620095
rs2171655	A	C	0.2606	0.05786	6.91e-06	3437	CD39+ secreting CD4 regulatory T cell %CD4 regulatory T cell	20.274	0.00586755
rs2569847	A	G	-0.1367	0.02941	3.46e-06	3437	CD39+ secreting CD4 regulatory T cell %CD4 regulatory T cell	21.5921	0.00624663
rs282011	C	T	0.1225	0.02738	7.93e-06	3437	CD39+ secreting CD4 regulatory T cell %CD4 regulatory T cell	20.0056	0.00579034
rs59428330	C	T	0.2934	0.06107	1.62e-06	3437	CD39+ secreting CD4 regulatory T cell %CD4 regulatory T cell	23.0681	0.0066708
rs7080854	G	A	-0.1276	0.02732	3.13e-06	3437	CD39+ secreting CD4 regulatory T cell %CD4 regulatory T cell	21.8015	0.00630685
rs74346764	G	A	-0.5655	0.1269	8.66e-06	3437	CD39+ secreting CD4 regulatory T cell %CD4 regulatory T cell	19.8467	0.00574461
rs79919890	C	T	-0.2086	0.04657	7.72e-06	3437	CD39+ secreting CD4 regulatory T cell %CD4 regulatory T cell	20.0523	0.00580375
rs10833398	T	C	-0.14	0.02967	2.45e-06	3629	CD14- CD16+ monocyte Absolute Count	22.2526	0.00609786
rs112150611	C	T	0.5241	0.1132	3.82e-06	3629	CD14- CD16+ monocyte Absolute Count	21.4238	0.00587206
rs115383270	G	A	-0.4624	0.03231	3.1e-45	3629	CD14- CD16+ monocyte Absolute Count	204.702	0.0534233
rs116662407	A	C	0.6791	0.1479	4.53e-06	3629	CD14- CD16+ monocyte Absolute Count	21.0713	0.00577602
rs117671592	A	G	1.056	0.2367	8.5e-06	3629	CD14- CD16+ monocyte Absolute Count	19.8926	0.00545468
rs12055035	T	C	-0.1261	0.02734	4.13e-06	3629	CD14- CD16+ monocyte Absolute Count	21.2615	0.00582784
rs12404245	T	C	0.3244	0.07033	4.12e-06	3629	CD14- CD16+ monocyte Absolute Count	21.2638	0.00582847
rs139025334	G	A	0.2343	0.04966	2.46e-06	3629	CD14- CD16+ monocyte Absolute Count	22.248	0.00609661
rs139922750	C	A	-2.48	0.5565	8.62e-06	3629	CD14- CD16+ monocyte Absolute Count	19.8488	0.00544272
rs143984211	G	T	0.3255	0.06954	2.96e-06	3629	CD14- CD16+ monocyte Absolute Count	21.8974	0.00600111
rs3853483	G	T	-0.137	0.02985	4.57e-06	3629	CD14- CD16+ monocyte Absolute Count	21.053	0.00577101
rs473026	G	A	-0.2658	0.05667	2.83e-06	3629	CD14- CD16+ monocyte Absolute Count	21.9869	0.00602548
rs6684716	C	T	0.1758	0.0383	4.6e-06	3629	CD14- CD16+ monocyte Absolute Count	21.0572	0.00577217
rs74975395	C	T	0.2379	0.04517	1.47e-07	3629	CD14- CD16+ monocyte Absolute Count	27.7236	0.00758568
rs77983030	C	T	0.218	0.04881	8.16e-06	3629	CD14- CD16+ monocyte Absolute Count	19.9368	0.00546673
rs8026803	T	C	-0.1516	0.03005	4.74e-07	3629	CD14- CD16+ monocyte Absolute Count	25.4372	0.00696446
rs9984228	C	T	-0.1332	0.02924	5.37e-06	3629	CD14- CD16+ monocyte Absolute Count	20.7403	0.00568578
rs10042327	G	A	0.233	0.05192	7.4e-06	3656	Naive-mature B cell Absolute Count	20.1282	0.00547836
rs115150472	C	T	2.627	0.579	5.91e-06	3656	Naive-mature B cell Absolute Count	20.5743	0.0055991
rs117344365	G	A	-0.4129	0.09241	8.13e-06	3656	Naive-mature B cell Absolute Count	19.9533	0.00543101
rs12799241	G	A	0.138	0.02805	9.07e-07	3656	Naive-mature B cell Absolute Count	24.1911	0.00657689
rs143397127	T	C	-0.4624	0.09926	3.3e-06	3656	Naive-mature B cell Absolute Count	21.6895	0.0059008
rs17056318	T	C	-0.2366	0.0457	2.36e-07	3656	Naive-mature B cell Absolute Count	26.7892	0.00727811
rs189761842	C	T	0.7902	0.1709	3.92e-06	3656	Naive-mature B cell Absolute Count	21.3674	0.00581369
rs2286599	G	A	0.1183	0.0266	8.96e-06	3656	Naive-mature B cell Absolute Count	19.7683	0.00538092
rs2390504	G	A	-0.2668	0.05743	3.51e-06	3656	Naive-mature B cell Absolute Count	21.5703	0.00586856
rs2395904	T	G	-0.1445	0.02761	1.74e-07	3656	Naive-mature B cell Absolute Count	27.3757	0.00743627
rs283340	T	C	0.1251	0.02477	4.6e-07	3656	Naive-mature B cell Absolute Count	25.4932	0.00692846
rs34764986	T	C	-0.2347	0.04805	1.08e-06	3656	Naive-mature B cell Absolute Count	23.8452	0.00648348
rs35607968	C	T	0.1584	0.03419	3.71e-06	3656	Naive-mature B cell Absolute Count	21.4523	0.00583665
rs3811215	G	T	-0.1229	0.02697	5.33e-06	3656	Naive-mature B cell Absolute Count	20.7541	0.00564776
rs58114937	A	G	0.1702	0.0363	2.84e-06	3656	Naive-mature B cell Absolute Count	21.9719	0.00597718
rs76263497	G	A	-0.1886	0.04138	5.34e-06	3656	Naive-mature B cell Absolute Count	20.7618	0.00564983
rs76981518	C	T	-0.2134	0.04708	6.01e-06	3656	Naive-mature B cell Absolute Count	20.5342	0.00558825
rs77983244	G	A	-0.3088	0.06711	4.34e-06	3656	Naive-mature B cell Absolute Count	21.1613	0.00575793
rs9564767	A	G	-0.1163	0.02507	3.63e-06	3656	Naive-mature B cell Absolute Count	21.5086	0.00585188
rs112831211	T	G	0.2999	0.06287	1.92e-06	3629	CD14+ CD16+ monocyte Absolute Count	22.7419	0.0062311
rs115451299	T	C	-1.259	0.2738	4.4e-06	3629	CD14+ CD16+ monocyte Absolute Count	21.1322	0.00579261
rs11856889	C	T	-0.1219	0.02604	2.93e-06	3629	CD14+ CD16+ monocyte Absolute Count	21.9021	0.00600238
rs13260841	C	T	-0.1335	0.02899	4.24e-06	3629	CD14+ CD16+ monocyte Absolute Count	21.1947	0.00580963
rs139795227	A	C	0.3162	0.05876	7.85e-08	3629	CD14+ CD16+ monocyte Absolute Count	28.9415	0.00791629
rs142005394	G	A	-1.045	0.2348	8.72e-06	3629	CD14+ CD16+ monocyte Absolute Count	19.7969	0.00542857
rs144601865	G	T	0.2327	0.05202	7.94e-06	3629	CD14+ CD16+ monocyte Absolute Count	19.9992	0.00548374
rs147218533	T	C	0.4261	0.09615	9.65e-06	3629	CD14+ CD16+ monocyte Absolute Count	19.6284	0.00538262
rs164182	T	G	-0.1966	0.03551	3.32e-08	3629	CD14+ CD16+ monocyte Absolute Count	30.6356	0.00837579
rs34386765	T	C	0.1544	0.02976	2.25e-07	3629	CD14+ CD16+ monocyte Absolute Count	26.9023	0.00736262
rs71436541	G	T	-0.373	0.08185	5.35e-06	3629	CD14+ CD16+ monocyte Absolute Count	20.7559	0.00569004
rs71632979	A	G	-0.6399	0.02726	1.56e-113	3629	CD14+ CD16+ monocyte Absolute Count	550.723	0.131824
rs72649637	T	C	0.3006	0.06709	7.69e-06	3629	CD14+ CD16+ monocyte Absolute Count	20.0643	0.00550148
rs77305308	T	C	0.321	0.06912	3.53e-06	3629	CD14+ CD16+ monocyte Absolute Count	21.5558	0.00590802
rs78723624	A	G	-0.6138	0.1357	6.34e-06	3629	CD14+ CD16+ monocyte Absolute Count	20.4482	0.00560616
rs913678	T	C	-0.1223	0.02595	2.54e-06	3629	CD14+ CD16+ monocyte Absolute Count	22.1993	0.00608333
rs9313620	C	T	0.1089	0.02447	8.83e-06	3629	CD14+ CD16+ monocyte Absolute Count	19.7947	0.00542797
rs115758894	G	A	0.2183	0.04551	1.68e-06	3629	CD14- CD16- Absolute Count	22.9961	0.00630031
rs11865775	C	T	-0.2121	0.04522	2.81e-06	3629	CD14- CD16- Absolute Count	21.9878	0.00602571
rs12301658	A	C	0.1659	0.03732	9.08e-06	3629	CD14- CD16- Absolute Count	19.7501	0.00541582
rs138772443	G	A	-0.806	0.1778	5.97e-06	3629	CD14- CD16- Absolute Count	20.5384	0.00563076
rs147699975	C	T	-0.5466	0.1136	1.54e-06	3629	CD14- CD16- Absolute Count	23.1389	0.00633919
rs149241803	G	A	-0.4023	0.08341	1.47e-06	3629	CD14- CD16- Absolute Count	23.2501	0.00636945
rs17296114	C	T	0.1413	0.03154	7.69e-06	3629	CD14- CD16- Absolute Count	20.0596	0.0055002
rs17540814	T	C	-2.368	0.5003	2.3e-06	3629	CD14- CD16- Absolute Count	22.3905	0.0061354
rs1800973	C	A	0.3084	0.0448	6.79e-12	3629	CD14- CD16- Absolute Count	47.3624	0.01289
rs2205245	G	T	-0.1857	0.04039	4.41e-06	3629	CD14- CD16- Absolute Count	21.1269	0.00579118
rs2324472	T	C	0.1119	0.02463	5.75e-06	3629	CD14- CD16- Absolute Count	20.6297	0.00565563
rs2562375	T	C	-0.1144	0.02503	5.01e-06	3629	CD14- CD16- Absolute Count	20.8781	0.00572335
rs445	C	T	-0.1786	0.03068	6.35e-09	3629	CD14- CD16- Absolute Count	33.8698	0.00925185
rs4806508	G	A	0.1365	0.02798	1.12e-06	3629	CD14- CD16- Absolute Count	23.7865	0.00651544
rs6921349	T	C	0.1393	0.03144	9.71e-06	3629	CD14- CD16- Absolute Count	19.6199	0.00538031
rs73161489	A	G	1.197	0.2693	9.03e-06	3629	CD14- CD16- Absolute Count	19.7459	0.00541465
rs761570	A	G	-0.1574	0.03409	4e-06	3629	CD14- CD16- Absolute Count	21.3067	0.00584016
rs76478186	G	A	-0.7414	0.1644	6.67e-06	3629	CD14- CD16- Absolute Count	20.3265	0.00557298
rs78327733	A	G	-0.2879	0.06052	2.03e-06	3629	CD14- CD16- Absolute Count	22.6176	0.00619725
rs79657767	C	T	-1.372	0.3077	8.53e-06	3629	CD14- CD16- Absolute Count	19.8707	0.00544871
rs8122111	A	G	0.1416	0.03039	3.29e-06	3629	CD14- CD16- Absolute Count	21.6983	0.00594686
rs10094039	A	G	-0.137	0.02784	9.09e-07	3629	CD14+ CD16- monocyte Absolute Count	24.2027	0.00662868
rs11177104	G	A	-0.6203	0.1351	4.58e-06	3629	CD14+ CD16- monocyte Absolute Count	21.0695	0.00577551
rs118111037	C	T	-1.458	0.3235	6.81e-06	3629	CD14+ CD16- monocyte Absolute Count	20.3015	0.00556616
rs12501003	A	G	0.1613	0.03189	4.45e-07	3629	CD14+ CD16- monocyte Absolute Count	25.5694	0.00700038
rs1375493	G	A	0.1517	0.02476	9.92e-10	3629	CD14+ CD16- monocyte Absolute Count	37.5172	0.010238
rs149927978	T	C	-0.5694	0.1283	9.36e-06	3629	CD14+ CD16- monocyte Absolute Count	19.6853	0.00539814
rs17465420	T	C	0.1094	0.02467	9.53e-06	3629	CD14+ CD16- monocyte Absolute Count	19.6543	0.00538967
rs183716470	T	G	-0.2044	0.04519	6.32e-06	3629	CD14+ CD16- monocyte Absolute Count	20.4474	0.00560594
rs189962728	T	C	-2.572	0.5658	5.67e-06	3629	CD14+ CD16- monocyte Absolute Count	20.6527	0.00566191
rs2120231	T	G	-0.1154	0.02415	1.82e-06	3629	CD14+ CD16- monocyte Absolute Count	22.8212	0.00625268
rs2247998	G	A	-0.1145	0.0254	6.7e-06	3629	CD14+ CD16- monocyte Absolute Count	20.3097	0.00556841
rs2418135	G	A	-0.1487	0.02438	1.16e-09	3629	CD14+ CD16- monocyte Absolute Count	37.1805	0.010147
rs2904118	C	T	-0.1157	0.02572	6.99e-06	3629	CD14+ CD16- monocyte Absolute Count	20.2249	0.00554527
rs310730	T	C	0.3004	0.06623	5.91e-06	3629	CD14+ CD16- monocyte Absolute Count	20.5613	0.005637
rs41331448	A	G	0.7646	0.1645	3.47e-06	3629	CD14+ CD16- monocyte Absolute Count	21.5922	0.00591796
rs445	C	T	-0.1822	0.02999	1.36e-09	3629	CD14+ CD16- monocyte Absolute Count	36.8896	0.0100684
rs536943	A	G	-0.1442	0.03221	7.78e-06	3629	CD14+ CD16- monocyte Absolute Count	20.0313	0.0054925
rs56010301	C	T	-0.1354	0.02942	4.34e-06	3629	CD14+ CD16- monocyte Absolute Count	21.1696	0.0058028
rs58943387	T	G	-0.1471	0.0314	2.9e-06	3629	CD14+ CD16- monocyte Absolute Count	21.9344	0.00601119
rs613224	T	C	0.3132	0.06285	6.53e-07	3629	CD14+ CD16- monocyte Absolute Count	24.8195	0.00679648
rs8076666	A	G	0.1284	0.02869	7.82e-06	3629	CD14+ CD16- monocyte Absolute Count	20.0184	0.00548898
rs9599503	T	C	-0.1276	0.02661	1.68e-06	3629	CD14+ CD16- monocyte Absolute Count	22.9812	0.00629624
rs10192574	A	C	-0.1122	0.02464	5.41e-06	3629	Monocyte Absolute Count	20.7236	0.00568124
rs11061521	C	A	0.1409	0.02965	2.1e-06	3629	Monocyte Absolute Count	22.5701	0.00618431
rs11177104	G	A	-0.6011	0.1352	9.08e-06	3629	Monocyte Absolute Count	19.7561	0.00541744
rs115451299	T	C	-1.305	0.2683	1.19e-06	3629	Monocyte Absolute Count	23.6451	0.00647695
rs116981568	C	T	0.2687	0.05573	1.48e-06	3629	Monocyte Absolute Count	23.2337	0.00636498
rs12346499	C	T	-0.1378	0.0244	1.77e-08	3629	Monocyte Absolute Count	31.8771	0.00871227
rs12501003	A	G	0.1594	0.03191	6.17e-07	3629	Monocyte Absolute Count	24.9393	0.00682905
rs1375493	G	A	0.127	0.02481	3.26e-07	3629	Monocyte Absolute Count	26.1887	0.00716873
rs139761995	C	T	0.8181	0.1798	5.57e-06	3629	Monocyte Absolute Count	20.6916	0.00567252
rs142584082	A	G	1.359	0.2946	4.09e-06	3629	Monocyte Absolute Count	21.2684	0.00582971
rs145530955	C	T	-0.332	0.07238	4.65e-06	3629	Monocyte Absolute Count	21.0281	0.00576423
rs183716470	T	G	-0.2002	0.04522	9.8e-06	3629	Monocyte Absolute Count	19.5897	0.00537206
rs1896857	A	G	0.1482	0.03176	3.16e-06	3629	Monocyte Absolute Count	21.7619	0.00596418
rs189962728	T	C	-2.819	0.5658	6.57e-07	3629	Monocyte Absolute Count	24.8099	0.00679386
rs2120231	T	G	-0.1189	0.02416	8.91e-07	3629	Monocyte Absolute Count	24.2064	0.0066297
rs2541899	C	T	0.1356	0.02947	4.36e-06	3629	Monocyte Absolute Count	21.1602	0.00580024
rs445	C	T	-0.1523	0.03005	4.25e-07	3629	Monocyte Absolute Count	25.6727	0.00702847
rs55971447	C	T	-0.1319	0.02885	5.02e-06	3629	Monocyte Absolute Count	20.891	0.00572686
rs6708174	T	C	-0.1359	0.02999	6.02e-06	3629	Monocyte Absolute Count	20.5233	0.00562663
rs75791731	G	T	-0.2237	0.04488	6.49e-07	3629	Monocyte Absolute Count	24.8306	0.00679949
rs9599503	T	C	-0.1213	0.02663	5.36e-06	3629	Monocyte Absolute Count	20.7367	0.00568482
rs10765883	C	T	0.1113	0.0249	8.08e-06	3629	CD14- CD16+ monocyte %monocyte	19.9688	0.00547545
rs115383270	G	A	-0.4468	0.03195	2.52e-43	3629	CD14- CD16+ monocyte %monocyte	195.454	0.0511332
rs115440084	C	T	0.3784	0.08326	5.69e-06	3629	CD14- CD16+ monocyte %monocyte	20.6438	0.00565949
rs1202098	G	A	-0.5784	0.1263	4.81e-06	3629	CD14- CD16+ monocyte %monocyte	20.9609	0.00574593
rs12637779	A	G	-0.1476	0.03328	9.42e-06	3629	CD14- CD16+ monocyte %monocyte	19.6592	0.00539103
rs137976321	G	A	0.3961	0.08712	5.62e-06	3629	CD14- CD16+ monocyte %monocyte	20.6602	0.00566396
rs141826566	C	T	2.173	0.4818	6.71e-06	3629	CD14- CD16+ monocyte %monocyte	20.3304	0.00557406
rs143356597	G	A	0.2965	0.06165	1.58e-06	3629	CD14- CD16+ monocyte %monocyte	23.1177	0.0063334
rs155144	G	A	0.1176	0.02427	1.31e-06	3629	CD14- CD16+ monocyte %monocyte	23.4658	0.00642817
rs185857822	C	T	-0.9516	0.2151	9.95e-06	3629	CD14- CD16+ monocyte %monocyte	19.5609	0.0053642
rs316369	T	C	0.1099	0.02441	6.96e-06	3629	CD14- CD16+ monocyte %monocyte	20.2591	0.00555461
rs3826007	C	T	-0.1739	0.02973	5.41e-09	3629	CD14- CD16+ monocyte %monocyte	34.1956	0.00934
rs4783204	T	C	0.1474	0.03107	2.18e-06	3629	CD14- CD16+ monocyte %monocyte	22.4943	0.00616368
rs4999522	G	A	-0.1117	0.02491	7.56e-06	3629	CD14- CD16+ monocyte %monocyte	20.0965	0.00551026
rs73046238	C	T	-0.9518	0.2129	8.07e-06	3629	CD14- CD16+ monocyte %monocyte	19.9756	0.00547732
rs74975395	C	T	0.2339	0.04486	1.95e-07	3629	CD14- CD16+ monocyte %monocyte	27.1708	0.00743556
rs7613930	C	T	-0.1399	0.02815	6.93e-07	3629	CD14- CD16+ monocyte %monocyte	24.6853	0.00675999
rs7834258	A	G	0.1627	0.03582	5.77e-06	3629	CD14- CD16+ monocyte %monocyte	20.6198	0.00565295
rs78829712	C	A	0.2763	0.05948	3.53e-06	3629	CD14- CD16+ monocyte %monocyte	21.5665	0.00591096
rs9357234	C	A	0.1193	0.02637	6.3e-06	3629	CD14- CD16+ monocyte %monocyte	20.456	0.0056083
rs112831211	T	G	0.2898	0.06363	5.43e-06	3629	CD14+ CD16+ monocyte %monocyte	20.7316	0.00568343
rs114032392	A	G	0.5828	0.1304	8.02e-06	3629	CD14+ CD16+ monocyte %monocyte	19.9639	0.0054741
rs11466597	T	C	0.3741	0.07173	1.94e-07	3629	CD14+ CD16+ monocyte %monocyte	27.1853	0.0074395
rs117302238	G	A	0.3235	0.06785	1.93e-06	3629	CD14+ CD16+ monocyte %monocyte	22.7201	0.00622515
rs141154517	G	A	-0.3263	0.07052	3.83e-06	3629	CD14+ CD16+ monocyte %monocyte	21.3978	0.005865
rs147218533	T	C	0.4909	0.09721	4.64e-07	3629	CD14+ CD16+ monocyte %monocyte	25.4874	0.00697808
rs164182	T	G	-0.1655	0.03598	4.37e-06	3629	CD14+ CD16+ monocyte %monocyte	21.1463	0.00579645
rs1903578	C	T	-0.1412	0.03062	4.11e-06	3629	CD14+ CD16+ monocyte %monocyte	21.253	0.00582552
rs34161492	C	T	0.22	0.04915	7.85e-06	3629	CD14+ CD16+ monocyte %monocyte	20.0244	0.00549061
rs34386765	T	C	0.1535	0.03012	3.61e-07	3629	CD14+ CD16+ monocyte %monocyte	25.9578	0.00710596
rs445	C	T	0.1652	0.03101	1.06e-07	3629	CD14+ CD16+ monocyte %monocyte	28.3646	0.00775973
rs4656251	A	G	-0.1218	0.02553	1.89e-06	3629	CD14+ CD16+ monocyte %monocyte	22.7485	0.00623291
rs56037947	A	G	-0.1131	0.02494	5.98e-06	3629	CD14+ CD16+ monocyte %monocyte	20.5538	0.00563496
rs6699725	C	T	0.2436	0.04624	1.46e-07	3629	CD14+ CD16+ monocyte %monocyte	27.7383	0.00758968
rs71632979	A	G	-0.7013	0.02722	1.41e-134	3629	CD14+ CD16+ monocyte %monocyte	663.425	0.154629
rs72649637	T	C	0.3399	0.06783	5.7e-07	3629	CD14+ CD16+ monocyte %monocyte	25.0969	0.0068719
rs75738537	G	A	0.3676	0.07899	3.37e-06	3629	CD14+ CD16+ monocyte %monocyte	21.6455	0.00593247
rs7604795	T	C	0.1541	0.03386	5.52e-06	3629	CD14+ CD16+ monocyte %monocyte	20.701	0.00567509
rs76127744	G	A	0.4933	0.1006	9.82e-07	3629	CD14+ CD16+ monocyte %monocyte	24.0318	0.0065822
rs77305308	T	C	0.3233	0.06994	3.91e-06	3629	CD14+ CD16+ monocyte %monocyte	21.356	0.00585361
rs77936882	T	G	0.2625	0.05739	4.94e-06	3629	CD14+ CD16+ monocyte %monocyte	20.9096	0.00573195
rs10833398	T	C	0.132	0.02957	8.3e-06	3629	CD14+ CD16- monocyte %monocyte	19.9162	0.0054611
rs111690368	C	T	-0.7379	0.1589	3.54e-06	3629	CD14+ CD16- monocyte %monocyte	21.553	0.00590727
rs115383270	G	A	0.5518	0.03171	3.21e-65	3629	CD14+ CD16- monocyte %monocyte	302.644	0.0770155
rs116915583	C	T	-2.112	0.4662	6.1e-06	3629	CD14+ CD16- monocyte %monocyte	20.5118	0.00562351
rs12637779	A	G	0.1521	0.03338	5.37e-06	3629	CD14+ CD16- monocyte %monocyte	20.7513	0.00568881
rs13330943	T	C	0.122	0.02599	2.81e-06	3629	CD14+ CD16- monocyte %monocyte	22.0226	0.00603519
rs137976321	G	A	-0.4021	0.08741	4.35e-06	3629	CD14+ CD16- monocyte %monocyte	21.1498	0.00579741
rs138743668	G	A	0.6107	0.1355	6.83e-06	3629	CD14+ CD16- monocyte %monocyte	20.302	0.00556629
rs139379948	G	A	0.5387	0.115	2.89e-06	3629	CD14+ CD16- monocyte %monocyte	21.931	0.00601026
rs141826566	C	T	-2.132	0.4804	9.34e-06	3629	CD14+ CD16- monocyte %monocyte	19.6847	0.00539797
rs142340414	C	T	-3.05	0.6547	3.29e-06	3629	CD14+ CD16- monocyte %monocyte	21.6908	0.00594482
rs143984211	G	T	-0.3205	0.06928	3.85e-06	3629	CD14+ CD16- monocyte %monocyte	21.3895	0.00586273
rs149602828	G	A	0.3065	0.06864	8.25e-06	3629	CD14+ CD16- monocyte %monocyte	19.9282	0.00546437
rs150125023	G	A	-0.3023	0.06636	5.41e-06	3629	CD14+ CD16- monocyte %monocyte	20.7407	0.00568591
rs155144	G	A	-0.1135	0.02438	3.36e-06	3629	CD14+ CD16- monocyte %monocyte	21.6613	0.00593679
rs4783204	T	C	-0.1438	0.03117	4.1e-06	3629	CD14+ CD16- monocyte %monocyte	21.2718	0.00583066
rs62083033	A	C	-1.287	0.2814	4.99e-06	3629	CD14+ CD16- monocyte %monocyte	20.9059	0.00573094
rs67760360	G	A	0.1575	0.02992	1.49e-07	3629	CD14+ CD16- monocyte %monocyte	27.6948	0.00757787
rs74975395	C	T	-0.254	0.04499	1.77e-08	3629	CD14+ CD16- monocyte %monocyte	31.8564	0.00870664
rs76293503	G	A	-1.209	0.2647	5.09e-06	3629	CD14+ CD16- monocyte %monocyte	20.85	0.00571569
rs78047442	G	T	0.1458	0.0328	9e-06	3629	CD14+ CD16- monocyte %monocyte	19.7482	0.0054153
rs79562353	T	C	0.2405	0.05147	3.08e-06	3629	CD14+ CD16- monocyte %monocyte	21.8214	0.00598039
rs10765883	C	T	0.1122	0.025	7.43e-06	3629	CD16+ monocyte %monocyte	20.131	0.00551969
rs111690368	C	T	0.7119	0.159	7.76e-06	3629	CD16+ monocyte %monocyte	20.0357	0.00549369
rs115383270	G	A	-0.5431	0.03176	4.06e-63	3629	CD16+ monocyte %monocyte	292.253	0.0745686
rs115440084	C	T	0.3715	0.0834	8.67e-06	3629	CD16+ monocyte %monocyte	19.8311	0.00543789
rs12582907	T	C	-0.1424	0.03159	6.82e-06	3629	CD16+ monocyte %monocyte	20.3087	0.00556812
rs12637779	A	G	-0.1513	0.03339	6.06e-06	3629	CD16+ monocyte %monocyte	20.5213	0.0056261
rs13330943	T	C	-0.1248	0.026	1.64e-06	3629	CD16+ monocyte %monocyte	23.0273	0.0063088
rs137976321	G	A	0.3913	0.08745	7.91e-06	3629	CD16+ monocyte %monocyte	20.0106	0.00548686
rs138743668	G	A	-0.6208	0.1356	4.83e-06	3629	CD16+ monocyte %monocyte	20.9481	0.00574243
rs139379948	G	A	-0.5341	0.115	3.54e-06	3629	CD16+ monocyte %monocyte	21.5581	0.00590866
rs143356597	G	A	0.2916	0.06193	2.59e-06	3629	CD16+ monocyte %monocyte	22.1581	0.00607213
rs150125023	G	A	0.302	0.06638	5.56e-06	3629	CD16+ monocyte %monocyte	20.6871	0.0056713
rs150451378	C	A	-0.4106	0.09264	9.57e-06	3629	CD16+ monocyte %monocyte	19.6337	0.00538405
rs155144	G	A	0.1127	0.02439	3.97e-06	3629	CD16+ monocyte %monocyte	21.3395	0.00584911
rs4783204	T	C	0.1482	0.03118	2.07e-06	3629	CD16+ monocyte %monocyte	22.579	0.00618674
rs67760360	G	A	-0.1632	0.02992	5.21e-08	3629	CD16+ monocyte %monocyte	29.7357	0.00813175
rs72982284	C	T	0.1303	0.02919	8.3e-06	3629	CD16+ monocyte %monocyte	19.915	0.00546079
rs74975395	C	T	0.2556	0.045	1.45e-08	3629	CD16+ monocyte %monocyte	32.2446	0.00881182
rs7613930	C	T	-0.1264	0.02825	7.94e-06	3629	CD16+ monocyte %monocyte	20.0087	0.00548632
rs79562353	T	C	-0.2421	0.05148	2.68e-06	3629	CD16+ monocyte %monocyte	22.1041	0.00605741
rs12049737	G	A	0.2633	0.05471	1.55e-06	3405	Activated & resting CD4 regulatory T cell Absolute Count	23.148	0.00675627
rs144404462	G	A	0.4385	0.08542	3.01e-07	3405	Activated & resting CD4 regulatory T cell Absolute Count	26.3369	0.00767989
rs146746694	G	A	0.5612	0.121	3.65e-06	3405	Activated & resting CD4 regulatory T cell Absolute Count	21.4986	0.00627787
rs147199078	T	C	0.354	0.07196	9.09e-07	3405	Activated & resting CD4 regulatory T cell Absolute Count	24.1863	0.00705718
rs1819445	G	A	-0.1624	0.03527	4.32e-06	3405	Activated & resting CD4 regulatory T cell Absolute Count	21.1888	0.00618797
rs182630194	G	A	1.629	0.3406	1.82e-06	3405	Activated & resting CD4 regulatory T cell Absolute Count	22.8611	0.00667311
rs2108908	A	C	0.2204	0.04371	4.85e-07	3405	Activated & resting CD4 regulatory T cell Absolute Count	25.4101	0.00741163
rs55732147	G	A	0.1242	0.02777	7.98e-06	3405	Activated & resting CD4 regulatory T cell Absolute Count	19.9911	0.00584024
rs6074425	G	A	0.1319	0.02841	3.58e-06	3405	Activated & resting CD4 regulatory T cell Absolute Count	21.5423	0.00629056
rs66762238	T	C	-0.1109	0.0244	5.73e-06	3405	Activated & resting CD4 regulatory T cell Absolute Count	20.6456	0.00603031
rs6751481	T	C	0.1507	0.02494	1.68e-09	3405	Activated & resting CD4 regulatory T cell Absolute Count	36.4904	0.0106092
rs79684619	A	G	0.2954	0.0592	6.33e-07	3405	Activated & resting CD4 regulatory T cell Absolute Count	24.8841	0.00725933
rs8064831	C	T	-0.1151	0.02518	5.03e-06	3405	Activated & resting CD4 regulatory T cell Absolute Count	20.8826	0.00609909
rs9272226	C	T	0.1634	0.03206	3.67e-07	3405	Activated & resting CD4 regulatory T cell Absolute Count	25.961	0.00757111
rs11627066	C	T	0.1182	0.02498	2.3e-06	3653	T/B cell	22.3775	0.00609181
rs12874404	A	G	-0.2201	0.02651	1.43e-16	3653	T/B cell	68.8942	0.0185205
rs13066480	G	A	-0.3246	0.07126	5.41e-06	3653	T/B cell	20.738	0.00564802
rs142089808	A	G	1.056	0.1984	1.09e-07	3653	T/B cell	28.3144	0.00769555
rs144426024	C	T	-0.515	0.1153	8.11e-06	3653	T/B cell	19.9397	0.00543176
rs150774187	G	A	-0.1591	0.03594	9.91e-06	3653	T/B cell	19.586	0.00533594
rs1523154	G	T	-0.1356	0.03037	8.27e-06	3653	T/B cell	19.9247	0.00542771
rs1557987	A	G	-0.1469	0.03233	5.67e-06	3653	T/B cell	20.6345	0.00561998
rs17113367	A	C	-0.1977	0.04229	3.05e-06	3653	T/B cell	21.8424	0.005947
rs191132013	G	T	-0.4832	0.1064	5.83e-06	3653	T/B cell	20.6126	0.00561405
rs34147569	T	C	0.1408	0.03016	3.15e-06	3653	T/B cell	21.7824	0.00593075
rs3738088	G	T	-0.5367	0.112	1.71e-06	3653	T/B cell	22.9503	0.00624678
rs4758148	A	G	-0.2716	0.06127	9.57e-06	3653	T/B cell	19.6393	0.00535037
rs4789817	A	G	-0.118	0.02659	9.37e-06	3653	T/B cell	19.6829	0.0053622
rs6585493	G	A	0.1501	0.03351	7.67e-06	3653	T/B cell	20.0528	0.00546241
rs7000289	A	G	0.143	0.02773	2.66e-07	3653	T/B cell	26.5787	0.00722724
rs73220980	G	A	-0.5434	0.1187	4.88e-06	3653	T/B cell	20.9459	0.00570432
rs73520190	T	G	-0.3757	0.08393	7.82e-06	3653	T/B cell	20.0267	0.00545535
rs7634218	C	A	-0.1205	0.02524	1.88e-06	3653	T/B cell	22.7802	0.00620075
rs77233730	C	T	0.2029	0.04505	6.88e-06	3653	T/B cell	20.2739	0.0055223
rs7990182	T	G	0.134	0.02471	6.18e-08	3653	T/B cell	29.3918	0.00798605
rs9368867	C	A	0.1318	0.02667	8.19e-07	3653	T/B cell	24.4088	0.00664112
rs9520905	G	T	-0.1166	0.02514	3.62e-06	3653	T/B cell	21.4995	0.00585419
rs9892810	T	C	0.1572	0.02469	2.18e-10	3653	T/B cell	40.5159	0.0109754
rs10990269	C	T	-0.117	0.02616	7.98e-06	3652	CD4+/CD8+ T cell	19.9921	0.00544745
rs11080350	C	T	0.1148	0.02558	7.37e-06	3652	CD4+/CD8+ T cell	20.13	0.00548483
rs11120194	T	C	-0.1735	0.03904	9.07e-06	3652	CD4+/CD8+ T cell	19.7397	0.00537906
rs12139740	C	T	0.1564	0.03494	7.83e-06	3652	CD4+/CD8+ T cell	20.0258	0.00545658
rs141317121	G	A	-0.2075	0.04621	7.34e-06	3652	CD4+/CD8+ T cell	20.1524	0.00549088
rs2516466	T	G	-0.1347	0.02995	7.1e-06	3652	CD4+/CD8+ T cell	20.2164	0.00550823
rs495055	A	G	0.3049	0.06527	3.1e-06	3652	CD4+/CD8+ T cell	21.8097	0.00593977
rs62130076	G	A	-0.121	0.02596	3.26e-06	3652	CD4+/CD8+ T cell	21.7132	0.00591364
rs73402222	T	C	0.1905	0.03406	2.39e-08	3652	CD4+/CD8+ T cell	31.2653	0.00849309
rs74493069	G	A	0.8545	0.1858	4.36e-06	3652	CD4+/CD8+ T cell	21.1395	0.0057583
rs798726	T	C	-0.1395	0.03005	3.56e-06	3652	CD4+/CD8+ T cell	21.5388	0.00586642
rs955275	A	G	0.2925	0.06149	2.04e-06	3652	CD4+/CD8+ T cell	22.6154	0.00615785
rs10265656	A	G	-0.2229	0.04923	6.15e-06	3656	IgD+ CD38+ B cell Absolute Count	20.4891	0.00557604
rs10821937	C	T	-0.1118	0.02511	8.81e-06	3656	IgD+ CD38+ B cell Absolute Count	19.8131	0.00539306
rs11068290	C	T	0.3555	0.07815	5.55e-06	3656	IgD+ CD38+ B cell Absolute Count	20.6816	0.00562813
rs11159480	G	T	-0.1526	0.0323	2.4e-06	3656	IgD+ CD38+ B cell Absolute Count	22.3083	0.00606812
rs116104104	C	T	5.387	1.184	5.51e-06	3656	IgD+ CD38+ B cell Absolute Count	20.6896	0.00563031
rs116285595	C	T	0.6503	0.1415	4.44e-06	3656	IgD+ CD38+ B cell Absolute Count	21.1095	0.0057439
rs118090735	T	G	1.518	0.3399	8.23e-06	3656	IgD+ CD38+ B cell Absolute Count	19.9344	0.0054259
rs12036556	C	T	0.3487	0.07421	2.71e-06	3656	IgD+ CD38+ B cell Absolute Count	22.0669	0.00600286
rs1294253	T	C	-0.1382	0.02658	2.1e-07	3656	IgD+ CD38+ B cell Absolute Count	27.019	0.00734007
rs140380950	T	C	-0.3568	0.06296	1.57e-08	3656	IgD+ CD38+ B cell Absolute Count	32.0983	0.00870795
rs143397127	T	C	-0.4626	0.09576	1.42e-06	3656	IgD+ CD38+ B cell Absolute Count	23.3241	0.00634269
rs146959444	T	C	1.249	0.2574	1.29e-06	3656	IgD+ CD38+ B cell Absolute Count	23.5326	0.00639902
rs16868356	T	C	0.4146	0.08532	1.23e-06	3656	IgD+ CD38+ B cell Absolute Count	23.6004	0.00641734
rs1919856	A	G	0.1675	0.03766	8.94e-06	3656	IgD+ CD38+ B cell Absolute Count	19.7711	0.0053817
rs2395904	T	G	-0.1279	0.02666	1.69e-06	3656	IgD+ CD38+ B cell Absolute Count	23.0029	0.00625589
rs374727947	T	G	0.6111	0.1307	3.02e-06	3656	IgD+ CD38+ B cell Absolute Count	21.8492	0.00594399
rs61878035	G	A	0.1453	0.03068	2.24e-06	3656	IgD+ CD38+ B cell Absolute Count	22.4173	0.00609759
rs7169431	A	G	-0.2007	0.04408	5.46e-06	3656	IgD+ CD38+ B cell Absolute Count	20.7192	0.00563832
rs733555	G	T	-0.1396	0.02714	2.85e-07	3656	IgD+ CD38+ B cell Absolute Count	26.4432	0.00718478
rs76112278	G	A	-0.4579	0.08605	1.09e-07	3656	IgD+ CD38+ B cell Absolute Count	28.301	0.00768569
rs76608654	T	C	0.2489	0.05423	4.56e-06	3656	IgD+ CD38+ B cell Absolute Count	21.0539	0.00572887
rs76660971	G	A	-0.1264	0.02828	8.15e-06	3656	IgD+ CD38+ B cell Absolute Count	19.9663	0.00543454
rs7667070	T	C	-0.2956	0.06254	2.36e-06	3656	IgD+ CD38+ B cell Absolute Count	22.3283	0.00607353
rs78188887	A	G	1.533	0.3206	1.8e-06	3656	IgD+ CD38+ B cell Absolute Count	22.8518	0.00621503
rs78658073	G	A	1.665	0.362	4.39e-06	3656	IgD+ CD38+ B cell Absolute Count	21.1433	0.00575307
rs794185	T	C	-0.1116	0.02511	9.06e-06	3656	IgD+ CD38+ B cell Absolute Count	19.7423	0.00537389
rs80330977	G	A	-0.2576	0.04422	6.16e-09	3656	IgD+ CD38+ B cell Absolute Count	33.9169	0.00919677
rs10270812	T	C	-0.118	0.0244	1.39e-06	3657	IgD- CD38+ B cell %B cell	23.3747	0.00635464
rs11938966	C	A	0.3165	0.06988	6.1e-06	3657	IgD- CD38+ B cell %B cell	20.5024	0.00557811
rs12493961	A	G	0.3884	0.08136	1.88e-06	3657	IgD- CD38+ B cell %B cell	22.7771	0.00619318
rs12636371	G	A	0.1185	0.02414	9.61e-07	3657	IgD- CD38+ B cell %B cell	24.0838	0.00654613
rs13075403	A	G	0.1247	0.02799	8.56e-06	3657	IgD- CD38+ B cell %B cell	19.8376	0.00539823
rs13235778	G	A	-0.1235	0.02712	5.46e-06	3657	IgD- CD38+ B cell %B cell	20.7261	0.00563863
rs148377259	T	C	-0.3437	0.06603	2.04e-07	3657	IgD- CD38+ B cell %B cell	27.0794	0.00735437
rs188550599	A	G	0.44	0.098	7.33e-06	3657	IgD- CD38+ B cell %B cell	20.1472	0.00548202
rs238926	G	A	-0.1152	0.02506	4.4e-06	3657	IgD- CD38+ B cell %B cell	21.1206	0.00574534
rs2792563	G	A	-0.1407	0.02479	1.49e-08	3657	IgD- CD38+ B cell %B cell	32.1957	0.00873175
rs478251	A	C	0.1745	0.03499	6.44e-07	3657	IgD- CD38+ B cell %B cell	24.858	0.00675514
rs76912165	A	G	0.4094	0.08778	3.22e-06	3657	IgD- CD38+ B cell %B cell	21.7404	0.00591295
rs10040274	G	A	0.132	0.02702	1.06e-06	3652	CD4+ T cell Absolute Count	23.8528	0.00649258
rs117563350	A	G	-0.324	0.06938	3.12e-06	3652	CD4+ T cell Absolute Count	21.7963	0.00593615
rs137903114	T	C	-0.9366	0.1901	8.72e-07	3652	CD4+ T cell Absolute Count	24.2609	0.00660292
rs139746725	G	T	1.531	0.3418	7.76e-06	3652	CD4+ T cell Absolute Count	20.0525	0.00546382
rs1849876	T	C	0.1324	0.02769	1.81e-06	3652	CD4+ T cell Absolute Count	22.8503	0.00622141
rs28578320	T	C	0.1133	0.02558	9.78e-06	3652	CD4+ T cell Absolute Count	19.6074	0.0053432
rs2972073	T	C	0.1612	0.03603	7.86e-06	3652	CD4+ T cell Absolute Count	20.0062	0.00545126
rs3129891	G	A	-0.1631	0.03448	2.32e-06	3652	CD4+ T cell Absolute Count	22.3633	0.00608962
rs3184504	T	C	-0.1838	0.02676	7.66e-12	3652	CD4+ T cell Absolute Count	47.1499	0.012753
rs3211602	G	A	-1.654	0.3577	3.88e-06	3652	CD4+ T cell Absolute Count	21.3695	0.00582059
rs414743	G	A	0.1352	0.02918	3.73e-06	3652	CD4+ T cell Absolute Count	21.4558	0.00584395
rs61935579	G	A	-0.2776	0.06065	4.88e-06	3652	CD4+ T cell Absolute Count	20.9382	0.00570377
rs7162344	G	A	-0.1136	0.02442	3.37e-06	3652	CD4+ T cell Absolute Count	21.6286	0.00589072
rs72960548	T	C	0.2456	0.04852	4.34e-07	3652	CD4+ T cell Absolute Count	25.6081	0.00696704
rs73132830	G	A	0.1352	0.03023	7.94e-06	3652	CD4+ T cell Absolute Count	19.9912	0.00544721
rs7537437	G	A	-0.1404	0.03159	9.07e-06	3652	CD4+ T cell Absolute Count	19.7423	0.00537974
rs78628680	A	G	0.3565	0.08034	9.38e-06	3652	CD4+ T cell Absolute Count	19.6797	0.00536277
rs905461	A	C	0.1209	0.02726	9.49e-06	3652	CD4+ T cell Absolute Count	19.6591	0.00535719
rs9271772	G	A	0.1877	0.03517	1.01e-07	3652	CD4+ T cell Absolute Count	28.4673	0.0077389
rs10497440	G	A	0.8837	0.1972	7.67e-06	3668	CD4+ T cell %T cell	20.0705	0.00544497
rs114574090	C	T	-0.5192	0.1169	9.29e-06	3668	CD4+ T cell %T cell	19.7153	0.00534911
rs114828374	A	G	-0.5469	0.1123	1.16e-06	3668	CD4+ T cell %T cell	23.7039	0.00642433
rs13210358	C	T	-0.3507	0.07187	1.11e-06	3668	CD4+ T cell %T cell	23.7979	0.00644966
rs1932067	T	C	0.145	0.03234	7.58e-06	3668	CD4+ T cell %T cell	20.0918	0.00545071
rs2516660	G	A	-0.1388	0.02977	3.24e-06	3668	CD4+ T cell %T cell	21.7262	0.0058915
rs2590261	C	T	0.1252	0.02684	3.23e-06	3668	CD4+ T cell %T cell	21.7474	0.0058972
rs3914424	G	A	1.04	0.2266	4.58e-06	3668	CD4+ T cell %T cell	21.0528	0.00570993
rs56009006	C	T	-0.2316	0.04988	3.55e-06	3668	CD4+ T cell %T cell	21.547	0.00584319
rs60342399	C	T	0.2398	0.05276	5.66e-06	3668	CD4+ T cell %T cell	20.6468	0.00560042
rs6744796	A	G	-0.1299	0.02681	1.31e-06	3668	CD4+ T cell %T cell	23.4632	0.00635952
rs72735973	T	C	-0.2963	0.065	5.34e-06	3668	CD4+ T cell %T cell	20.7682	0.00563318
rs7280330	T	C	-0.1982	0.04474	9.74e-06	3668	CD4+ T cell %T cell	19.6146	0.00532192
rs73162393	C	T	-0.2038	0.04539	7.33e-06	3668	CD4+ T cell %T cell	20.1489	0.00546611
rs74950524	G	A	0.1324	0.0299	9.88e-06	3668	CD4+ T cell %T cell	19.5973	0.00531727
rs75478218	G	A	0.5431	0.1173	3.75e-06	3668	CD4+ T cell %T cell	21.4253	0.00581037
rs798726	T	C	-0.1368	0.02974	4.38e-06	3668	CD4+ T cell %T cell	21.1472	0.00573539
rs9266287	A	G	0.1665	0.0344	1.35e-06	3668	CD4+ T cell %T cell	23.414	0.00634625
rs11060493	A	C	0.1796	0.03884	3.91e-06	3652	CD8+ T cell Absolute Count	21.3706	0.00582087
rs11080350	C	T	-0.1209	0.02469	1.02e-06	3652	CD8+ T cell Absolute Count	23.9647	0.00652285
rs11197647	G	T	0.2221	0.04476	7.32e-07	3652	CD8+ T cell Absolute Count	24.6082	0.00669681
rs113985770	G	A	-0.5533	0.1242	8.68e-06	3652	CD8+ T cell Absolute Count	19.8354	0.00540497
rs117391590	G	A	-0.2742	0.05955	4.29e-06	3652	CD8+ T cell Absolute Count	21.1901	0.005772
rs11772710	C	T	-0.1099	0.02405	5.01e-06	3652	CD8+ T cell Absolute Count	20.8702	0.00568536
rs12119984	A	G	-0.6212	0.1311	2.24e-06	3652	CD8+ T cell Absolute Count	22.4398	0.00611033
rs12130486	T	C	0.36	0.07639	2.54e-06	3652	CD8+ T cell Absolute Count	22.197	0.00604461
rs12195711	C	T	0.1703	0.0353	1.46e-06	3652	CD8+ T cell Absolute Count	23.2617	0.00633272
rs1550856	A	G	-0.1417	0.02903	1.1e-06	3652	CD8+ T cell Absolute Count	23.8126	0.00648173
rs1980812	A	G	-0.1135	0.02467	4.34e-06	3652	CD8+ T cell Absolute Count	21.1551	0.00576252
rs2267983	C	A	-0.1266	0.02472	3.18e-07	3652	CD8+ T cell Absolute Count	26.214	0.00713069
rs2837838	A	G	0.2056	0.04518	5.54e-06	3652	CD8+ T cell Absolute Count	20.6974	0.00563855
rs28415769	T	C	-0.11	0.02484	9.76e-06	3652	CD8+ T cell Absolute Count	19.5995	0.00534104
rs3130685	C	T	0.1887	0.0284	3.52e-11	3652	CD8+ T cell Absolute Count	44.1234	0.0119442
rs35238206	A	G	0.1229	0.02638	3.33e-06	3652	CD8+ T cell Absolute Count	21.6928	0.00590813
rs6858602	T	C	-0.1209	0.02381	3.96e-07	3652	CD8+ T cell Absolute Count	25.7689	0.00701048
rs75424572	T	G	0.2774	0.06193	7.73e-06	3652	CD8+ T cell Absolute Count	20.0527	0.00546387
rs78032118	C	T	0.6899	0.1458	2.32e-06	3652	CD8+ T cell Absolute Count	22.3779	0.00609357
rs79647440	C	T	3.671	0.8061	5.43e-06	3652	CD8+ T cell Absolute Count	20.7278	0.00564678
rs10990269	C	T	0.1232	0.02583	1.91e-06	3668	CD8+ T cell %T cell	22.7371	0.00616393
rs12139740	C	T	-0.1603	0.03454	3.59e-06	3668	CD8+ T cell %T cell	21.5271	0.00583781
rs12449027	G	A	-0.1374	0.03073	8.02e-06	3668	CD8+ T cell %T cell	19.9807	0.00542074
rs141317121	G	A	0.2079	0.04572	5.63e-06	3668	CD8+ T cell %T cell	20.6662	0.00560565
rs1676877	A	G	0.1876	0.04029	3.33e-06	3668	CD8+ T cell %T cell	21.6688	0.00587601
rs2337390	A	G	0.135	0.02972	5.74e-06	3668	CD8+ T cell %T cell	20.6221	0.00559377
rs2516466	T	G	0.1401	0.02887	1.26e-06	3668	CD8+ T cell %T cell	23.5367	0.00637931
rs40653	C	T	-0.1132	0.02509	6.62e-06	3668	CD8+ T cell %T cell	20.3449	0.00551898
rs495055	A	G	-0.2968	0.06444	4.24e-06	3668	CD8+ T cell %T cell	21.2021	0.0057502
rs62130076	G	A	0.1233	0.02565	1.61e-06	3668	CD8+ T cell %T cell	23.0948	0.00626029
rs62458311	G	A	0.2698	0.05927	5.47e-06	3668	CD8+ T cell %T cell	20.7099	0.00561744
rs73402222	T	C	-0.1934	0.03245	2.76e-09	3668	CD8+ T cell %T cell	35.5015	0.00959111
rs73516994	C	T	-0.2993	0.06686	7.81e-06	3668	CD8+ T cell %T cell	20.0283	0.00543357
rs74381175	G	T	-0.372	0.08388	9.5e-06	3668	CD8+ T cell %T cell	19.6577	0.00533356
rs74493069	G	A	-0.8197	0.1848	9.44e-06	3668	CD8+ T cell %T cell	19.6639	0.00533523
rs76595423	T	G	0.9785	0.2124	4.24e-06	3668	CD8+ T cell %T cell	21.2117	0.00575278
rs7670980	G	T	-0.2001	0.04467	7.71e-06	3668	CD8+ T cell %T cell	20.0551	0.00544081
rs7826289	C	T	-0.3983	0.08953	8.91e-06	3668	CD8+ T cell %T cell	19.7809	0.00536682
rs798726	T	C	0.135	0.02972	5.76e-06	3668	CD8+ T cell %T cell	20.6221	0.00559377
rs955275	A	G	-0.2919	0.06061	1.53e-06	3668	CD8+ T cell %T cell	23.1816	0.00628366
rs10002165	T	C	-0.3786	0.08521	9.12e-06	3652	CD4+CD8+ T cell Absolute Count	19.7307	0.0053766
rs10851760	A	G	-0.1506	0.03184	2.34e-06	3652	CD4+CD8+ T cell Absolute Count	22.3597	0.00608865
rs11025036	G	A	-0.4567	0.08253	3.35e-08	3652	CD4+CD8+ T cell Absolute Count	30.6056	0.00831536
rs117166897	A	G	-0.2471	0.05363	4.23e-06	3652	CD4+CD8+ T cell Absolute Count	21.2174	0.00577939
rs11725463	A	G	-0.2338	0.05261	9.07e-06	3652	CD4+CD8+ T cell Absolute Count	19.7385	0.00537873
rs12142860	G	T	0.5894	0.1289	4.97e-06	3652	CD4+CD8+ T cell Absolute Count	20.8966	0.00569252
rs147688743	G	A	-0.4601	0.09898	3.45e-06	3652	CD4+CD8+ T cell Absolute Count	21.5959	0.00588189
rs1764923	G	T	-0.1177	0.02548	3.96e-06	3652	CD4+CD8+ T cell Absolute Count	21.3263	0.00580889
rs2857229	A	G	0.273	0.02764	1.03e-22	3652	CD4+CD8+ T cell Absolute Count	97.5015	0.0260177
rs6022045	T	C	-0.1144	0.02505	5.16e-06	3652	CD4+CD8+ T cell Absolute Count	20.8448	0.00567849
rs62314120	G	A	0.1612	0.03605	7.96e-06	3652	CD4+CD8+ T cell Absolute Count	19.984	0.00544525
rs7141604	C	T	0.1146	0.0256	7.82e-06	3652	CD4+CD8+ T cell Absolute Count	20.0286	0.00545735
rs7160965	T	C	0.1768	0.03976	9.02e-06	3652	CD4+CD8+ T cell Absolute Count	19.7621	0.00538513
rs72694502	T	C	-0.3783	0.08288	5.15e-06	3652	CD4+CD8+ T cell Absolute Count	20.8226	0.00567247
rs75275131	A	G	0.6861	0.1442	2.03e-06	3652	CD4+CD8+ T cell Absolute Count	22.6259	0.0061607
rs77965313	A	C	-0.3127	0.06542	1.82e-06	3652	CD4+CD8+ T cell Absolute Count	22.8348	0.00621721
rs857241	T	G	-0.9906	0.2154	4.4e-06	3652	CD4+CD8+ T cell Absolute Count	21.1382	0.00575793
rs10490700	A	G	0.1298	0.02828	4.57e-06	3668	CD4+CD8+ T cell %T cell	21.0549	0.0057105
rs111582587	C	T	0.204	0.04517	6.51e-06	3668	CD4+CD8+ T cell %T cell	20.3856	0.00552997
rs16987794	T	C	-0.1524	0.0343	9.11e-06	3668	CD4+CD8+ T cell %T cell	19.7308	0.0053533
rs28459093	C	T	-0.2518	0.05143	1.02e-06	3668	CD4+CD8+ T cell %T cell	23.9575	0.00649262
rs45551732	C	T	0.3406	0.07216	2.45e-06	3668	CD4+CD8+ T cell %T cell	22.2669	0.00603722
rs73095609	C	T	-0.1291	0.02727	2.29e-06	3668	CD4+CD8+ T cell %T cell	22.3999	0.00607306
rs74197595	T	G	0.1508	0.03341	6.53e-06	3668	CD4+CD8+ T cell %T cell	20.3616	0.00552351
rs10059100	A	G	-0.1187	0.02599	5.1e-06	3437	Activated & resting CD4 regulatory T cell %CD4 regulatory T cell	20.8466	0.00603228
rs113435341	A	G	2.569	0.2103	1.28e-33	3437	Activated & resting CD4 regulatory T cell %CD4 regulatory T cell	149.141	0.0416113
rs11577174	C	T	-1.588	0.343	3.78e-06	3437	Activated & resting CD4 regulatory T cell %CD4 regulatory T cell	21.422	0.00619774
rs11579717	G	A	1.815	0.1783	5.33e-24	3437	Activated & resting CD4 regulatory T cell %CD4 regulatory T cell	103.561	0.0292665
rs116794175	T	C	1.427	0.1851	1.62e-14	3437	Activated & resting CD4 regulatory T cell %CD4 regulatory T cell	59.3994	0.0169985
rs11739607	T	C	0.3732	0.08311	7.34e-06	3437	Activated & resting CD4 regulatory T cell %CD4 regulatory T cell	20.1523	0.00583253
rs1371404	C	A	-0.1132	0.02435	3.44e-06	3437	Activated & resting CD4 regulatory T cell %CD4 regulatory T cell	21.5994	0.00624875
rs187089343	A	C	0.8446	0.1818	3.53e-06	3437	Activated & resting CD4 regulatory T cell %CD4 regulatory T cell	21.5706	0.00624045
rs2148708	A	G	0.2102	0.04643	6.15e-06	3437	Activated & resting CD4 regulatory T cell %CD4 regulatory T cell	20.484	0.00592798
rs4759006	G	A	-0.1503	0.0334	7.03e-06	3437	Activated & resting CD4 regulatory T cell %CD4 regulatory T cell	20.2382	0.00585726
rs562562	G	A	-0.1195	0.02499	1.81e-06	3437	Activated & resting CD4 regulatory T cell %CD4 regulatory T cell	22.8534	0.00660912
rs60220946	C	T	0.4221	0.08216	2.95e-07	3437	Activated & resting CD4 regulatory T cell %CD4 regulatory T cell	26.3789	0.00762093
rs62322628	C	T	0.7983	0.1768	6.55e-06	3437	Activated & resting CD4 regulatory T cell %CD4 regulatory T cell	20.3758	0.00589684
rs6751481	T	C	0.2886	0.02387	5.49e-33	3437	Activated & resting CD4 regulatory T cell %CD4 regulatory T cell	146.095	0.0407962
rs73579441	T	C	0.2151	0.04733	5.71e-06	3437	Activated & resting CD4 regulatory T cell %CD4 regulatory T cell	20.6422	0.00597346
rs75981740	A	G	-0.2161	0.04613	2.92e-06	3437	Activated & resting CD4 regulatory T cell %CD4 regulatory T cell	21.9326	0.00634452
rs7825970	G	T	-0.1086	0.02433	8.28e-06	3437	Activated & resting CD4 regulatory T cell %CD4 regulatory T cell	19.9124	0.00576349
rs7893324	T	C	-0.1646	0.03371	1.09e-06	3437	Activated & resting CD4 regulatory T cell %CD4 regulatory T cell	23.8281	0.00688907
rs79607503	G	A	0.5324	0.1165	5.06e-06	3437	Activated & resting CD4 regulatory T cell %CD4 regulatory T cell	20.8724	0.00603968
rs9265947	T	C	-0.1408	0.0312	6.59e-06	3437	Activated & resting CD4 regulatory T cell %CD4 regulatory T cell	20.3537	0.00589048
rs111273508	G	A	0.5877	0.1116	1.46e-07	3652	CD8dim T cell Absolute Count	27.7169	0.00753645
rs111748563	A	G	0.287	0.0554	2.32e-07	3652	CD8dim T cell Absolute Count	26.8229	0.00729514
rs11676464	G	A	-0.1862	0.03849	1.37e-06	3652	CD8dim T cell Absolute Count	23.3898	0.00636735
rs12185529	G	A	0.3467	0.07739	7.7e-06	3652	CD8dim T cell Absolute Count	20.0586	0.00546546
rs139090356	A	G	0.8772	0.1925	5.36e-06	3652	CD8dim T cell Absolute Count	20.7538	0.00565383
rs139249541	A	G	0.4806	0.07016	8.63e-12	3652	CD8dim T cell Absolute Count	46.8976	0.0126857
rs149916994	G	T	0.5136	0.1125	5.1e-06	3652	CD8dim T cell Absolute Count	20.8309	0.0056747
rs1554808	T	G	0.2542	0.0529	1.6e-06	3652	CD8dim T cell Absolute Count	23.0782	0.00628307
rs2733684	C	T	0.5569	0.1232	6.42e-06	3652	CD8dim T cell Absolute Count	20.4219	0.0055639
rs2937553	A	G	-0.1232	0.02537	1.24e-06	3652	CD8dim T cell Absolute Count	23.5691	0.00641585
rs34562168	T	C	-0.1783	0.03918	5.52e-06	3652	CD8dim T cell Absolute Count	20.6984	0.00563881
rs35947132	G	A	0.1823	0.04095	8.79e-06	3652	CD8dim T cell Absolute Count	19.8074	0.0053974
rs4438746	C	T	0.1223	0.02706	6.44e-06	3652	CD8dim T cell Absolute Count	20.4155	0.00556217
rs60409696	C	T	0.3254	0.07183	6.11e-06	3652	CD8dim T cell Absolute Count	20.5109	0.00558803
rs62020708	A	G	2.057	0.4593	7.72e-06	3652	CD8dim T cell Absolute Count	20.0465	0.00546218
rs62210845	G	A	0.1215	0.02672	5.6e-06	3652	CD8dim T cell Absolute Count	20.6653	0.00562985
rs7152367	G	A	0.4269	0.09226	3.83e-06	3652	CD8dim T cell Absolute Count	21.3987	0.00582849
rs72974644	G	A	0.3124	0.06881	5.82e-06	3652	CD8dim T cell Absolute Count	20.6007	0.00561234
rs74508088	C	T	0.3911	0.08664	6.54e-06	3652	CD8dim T cell Absolute Count	20.3658	0.0055487
rs79251210	G	A	0.425	0.06368	2.87e-11	3652	CD8dim T cell Absolute Count	44.5178	0.0120497
rs80109323	C	T	1.635	0.335	1.11e-06	3652	CD8dim T cell Absolute Count	23.8072	0.00648025
rs9916629	T	C	0.1339	0.02395	2.41e-08	3652	CD8dim T cell Absolute Count	31.2401	0.00848629
rs111748563	A	G	0.2822	0.05658	6.43e-07	3668	CD8dim T cell %T cell	24.8629	0.00673633
rs112505246	T	C	0.2492	0.04564	5.1e-08	3668	CD8dim T cell %T cell	29.7967	0.00806232
rs12871857	C	T	-0.2478	0.0518	1.78e-06	3668	CD8dim T cell %T cell	22.8721	0.0062003
rs139249541	A	G	0.5664	0.07147	2.99e-15	3668	CD8dim T cell %T cell	62.7714	0.0168343
rs140922347	C	A	-0.2385	0.05344	8.36e-06	3668	CD8dim T cell %T cell	19.9071	0.00540086
rs141447985	C	T	0.2484	0.05362	3.73e-06	3668	CD8dim T cell %T cell	21.4493	0.00581683
rs142704274	G	A	-0.4063	0.08932	5.55e-06	3668	CD8dim T cell %T cell	20.6804	0.0056095
rs143576769	C	T	-0.2491	0.0559	8.57e-06	3668	CD8dim T cell %T cell	19.8466	0.00538455
rs2937553	A	G	-0.1271	0.02585	9.14e-07	3668	CD8dim T cell %T cell	24.162	0.00654768
rs60409696	C	T	0.3384	0.07317	3.88e-06	3668	CD8dim T cell %T cell	21.3775	0.00579749
rs62287820	A	G	0.4238	0.09352	6.03e-06	3668	CD8dim T cell %T cell	20.5247	0.00556748
rs7274761	A	G	-0.3219	0.07242	9.07e-06	3668	CD8dim T cell %T cell	19.7464	0.00535751
rs76747637	G	A	0.6898	0.1545	8.25e-06	3668	CD8dim T cell %T cell	19.9229	0.00540513
rs77148456	G	A	-0.5896	0.1245	2.25e-06	3668	CD8dim T cell %T cell	22.415	0.00607714
rs79086781	C	T	0.4888	0.06448	4.31e-14	3668	CD8dim T cell %T cell	57.4348	0.0154252
rs8022863	A	G	0.1214	0.02713	7.82e-06	3668	CD8dim T cell %T cell	20.0125	0.0054293
rs9457418	C	T	0.1156	0.02534	5.22e-06	3668	CD8dim T cell %T cell	20.8001	0.00564178
rs11103734	C	T	0.2314	0.05166	7.69e-06	3652	CD4-CD8- T cell Absolute Count	20.053	0.00546396
rs11124150	A	G	-0.1256	0.02408	1.92e-07	3652	CD4-CD8- T cell Absolute Count	27.1912	0.00739456
rs111273508	G	A	0.5059	0.1084	3.19e-06	3652	CD4-CD8- T cell Absolute Count	21.7687	0.00592867
rs111891110	T	C	0.2797	0.0614	5.39e-06	3652	CD4-CD8- T cell Absolute Count	20.7401	0.00565011
rs115364254	T	G	0.1552	0.03343	3.57e-06	3652	CD4-CD8- T cell Absolute Count	21.5413	0.00586711
rs11610256	C	T	-0.1391	0.02841	1.02e-06	3652	CD4-CD8- T cell Absolute Count	23.9593	0.00652138
rs12904219	A	G	-0.1076	0.02338	4.34e-06	3652	CD4-CD8- T cell Absolute Count	21.1689	0.00576625
rs13108209	G	A	-0.1167	0.02566	5.58e-06	3652	CD4-CD8- T cell Absolute Count	20.6724	0.00563177
rs139249541	A	G	0.3666	0.06837	8.76e-08	3652	CD4-CD8- T cell Absolute Count	28.7353	0.00781119
rs4298345	G	A	0.3598	0.07296	8.52e-07	3652	CD4-CD8- T cell Absolute Count	24.3061	0.00661515
rs4711821	G	A	0.1287	0.02597	7.48e-07	3652	CD4-CD8- T cell Absolute Count	24.5457	0.00667993
rs577044375	T	C	-0.4534	0.09558	2.18e-06	3652	CD4-CD8- T cell Absolute Count	22.4901	0.00612393
rs61974190	G	A	0.1278	0.0281	5.65e-06	3652	CD4-CD8- T cell Absolute Count	20.6734	0.00563204
rs639937	G	A	-0.1192	0.02622	5.63e-06	3652	CD4-CD8- T cell Absolute Count	20.6561	0.00562737
rs6708291	C	T	0.1152	0.02578	8.15e-06	3652	CD4-CD8- T cell Absolute Count	19.9573	0.00543801
rs6755452	T	G	0.2134	0.02962	7.04e-13	3652	CD4-CD8- T cell Absolute Count	51.8777	0.0140139
rs6860349	G	A	-0.1032	0.02316	8.62e-06	3652	CD4-CD8- T cell Absolute Count	19.8447	0.0054075
rs7869045	G	A	-0.2658	0.05526	1.57e-06	3652	CD4-CD8- T cell Absolute Count	23.1233	0.00629528
rs79251210	G	A	0.2997	0.06194	1.36e-06	3652	CD4-CD8- T cell Absolute Count	23.3988	0.00636979
rs9896155	A	G	0.1433	0.02475	7.59e-09	3652	CD4-CD8- T cell Absolute Count	33.5046	0.00909584
rs11124150	A	G	-0.1138	0.02481	4.66e-06	3668	CD4-CD8- T cell %T cell	21.0278	0.00570319
rs11180823	A	C	-0.1225	0.02472	7.53e-07	3668	CD4-CD8- T cell %T cell	24.5436	0.0066504
rs117051230	T	G	-0.4874	0.1083	6.99e-06	3668	CD4-CD8- T cell %T cell	20.2431	0.00549153
rs13108209	G	A	-0.1197	0.02644	6.1e-06	3668	CD4-CD8- T cell %T cell	20.4846	0.00555669
rs139249541	A	G	0.4569	0.0704	9.72e-11	3668	CD4-CD8- T cell %T cell	42.0979	0.011353
rs140247402	C	T	-0.2435	0.05471	8.84e-06	3668	CD4-CD8- T cell %T cell	19.7983	0.00537151
rs2177640	C	A	0.1265	0.02826	7.77e-06	3668	CD4-CD8- T cell %T cell	20.0263	0.00543302
rs4711821	G	A	0.1198	0.02672	7.53e-06	3668	CD4-CD8- T cell %T cell	20.0911	0.00545052
rs7021333	T	G	-0.1188	0.02407	8.36e-07	3668	CD4-CD8- T cell %T cell	24.3469	0.00659746
rs7569868	C	T	0.246	0.03076	1.7e-15	3668	CD4-CD8- T cell %T cell	63.9235	0.017138
rs78522661	C	T	0.1788	0.03917	5.15e-06	3668	CD4-CD8- T cell %T cell	20.8253	0.00564857
rs79251210	G	A	0.3685	0.0638	8.33e-09	3668	CD4-CD8- T cell %T cell	33.3424	0.00901306
rs9896155	A	G	0.1207	0.02552	2.33e-06	3668	CD4-CD8- T cell %T cell	22.3571	0.00606155
rs11134931	G	A	-0.1214	0.02723	8.46e-06	3657	IgD+ CD24+ B cell %B cell	19.8657	0.00540584
rs112570989	C	T	-0.4808	0.1031	3.24e-06	3657	IgD+ CD24+ B cell %B cell	21.7357	0.00591169
rs11584183	T	C	-0.1336	0.03015	9.7e-06	3657	IgD+ CD24+ B cell %B cell	19.6246	0.00534057
rs12874404	A	G	0.1313	0.027	1.2e-06	3657	IgD+ CD24+ B cell %B cell	23.6355	0.00642507
rs145371905	G	T	0.4126	0.09065	5.5e-06	3657	IgD+ CD24+ B cell %B cell	20.7055	0.00563306
rs45575344	T	C	-0.1674	0.0367	5.28e-06	3657	IgD+ CD24+ B cell %B cell	20.7942	0.00565705
rs45608038	A	G	0.2797	0.063	9.25e-06	3657	IgD+ CD24+ B cell %B cell	19.7	0.00536098
rs62562996	G	A	-0.4312	0.09145	2.51e-06	3657	IgD+ CD24+ B cell %B cell	22.2204	0.00604273
rs75766272	C	T	-0.4552	0.08737	1.99e-07	3657	IgD+ CD24+ B cell %B cell	27.1295	0.00736789
rs76477280	A	G	0.4747	0.08918	1.08e-07	3657	IgD+ CD24+ B cell %B cell	28.3182	0.00768824
rs78269238	C	T	0.2453	0.05457	7.15e-06	3657	IgD+ CD24+ B cell %B cell	20.1953	0.00549502
rs9369326	T	C	-0.1237	0.02675	3.92e-06	3657	IgD+ CD24+ B cell %B cell	21.3724	0.00581346
rs12033535	T	C	0.5036	0.1116	6.57e-06	3653	Leukocyte Absolute Count	20.3519	0.00554344
rs185513166	C	T	-0.3558	0.07642	3.34e-06	3653	Leukocyte Absolute Count	21.6651	0.005899
rs72762395	C	T	-0.3748	0.07214	2.15e-07	3653	Leukocyte Absolute Count	26.978	0.007335
rs74698222	C	T	-1.792	0.3963	6.36e-06	3653	Leukocyte Absolute Count	20.4357	0.00556614
rs75663237	T	C	-0.2284	0.05143	9.23e-06	3653	Leukocyte Absolute Count	19.7116	0.00536996
rs77745857	C	A	-0.3257	0.07123	4.97e-06	3653	Leukocyte Absolute Count	20.8964	0.00569091
rs78158338	G	A	0.2865	0.06021	2.02e-06	3653	Leukocyte Absolute Count	22.6295	0.00615997
rs960562	C	T	-0.311	0.0603	2.64e-07	3653	Leukocyte Absolute Count	26.5857	0.00722912
rs10040274	G	A	0.1212	0.02719	8.6e-06	3653	Lymphocyte Absolute Count	19.8586	0.0054098
rs10410390	T	C	0.1125	0.02503	7.13e-06	3653	Lymphocyte Absolute Count	20.1904	0.00549969
rs11702153	C	T	0.1591	0.03503	5.76e-06	3653	Lymphocyte Absolute Count	20.6168	0.0056152
rs117336432	C	T	-1.537	0.3352	4.71e-06	3653	Lymphocyte Absolute Count	21.0137	0.00572266
rs12417637	A	G	0.1866	0.04033	3.85e-06	3653	Lymphocyte Absolute Count	21.3958	0.00582612
rs17824379	A	G	-1.046	0.2266	4.03e-06	3653	Lymphocyte Absolute Count	21.2964	0.0057992
rs2797531	G	A	0.1303	0.02871	5.88e-06	3653	Lymphocyte Absolute Count	20.5866	0.005607
rs55802874	A	G	0.1317	0.02947	8.15e-06	3653	Lymphocyte Absolute Count	19.9606	0.00543743
rs6942586	G	A	-0.1163	0.02565	5.96e-06	3653	Lymphocyte Absolute Count	20.5469	0.00559626
rs72960548	T	C	0.2319	0.04877	2.07e-06	3653	Lymphocyte Absolute Count	22.5974	0.0061513
rs7302662	T	C	-0.4219	0.09359	6.74e-06	3653	Lymphocyte Absolute Count	20.3106	0.00553224
rs79508330	C	T	-0.3326	0.07255	4.71e-06	3653	Lymphocyte Absolute Count	21.0054	0.00572043
rs9271629	C	A	0.1945	0.03437	1.65e-08	3653	Lymphocyte Absolute Count	32.0068	0.0086904
rs941767	A	G	-0.1772	0.03912	6.11e-06	3653	Lymphocyte Absolute Count	20.5065	0.00558531
rs111373552	C	T	0.2168	0.04737	4.87e-06	3669	Lymphocyte %leukocyte	20.9351	0.00567664
rs112405229	G	A	-0.2852	0.06341	7.1e-06	3669	Lymphocyte %leukocyte	20.2184	0.00548337
rs11960775	G	A	0.2088	0.04693	8.88e-06	3669	Lymphocyte %leukocyte	19.7844	0.0053663
rs150146725	T	C	-0.3554	0.07949	8.05e-06	3669	Lymphocyte %leukocyte	19.979	0.00541879
rs184624056	A	G	-0.5777	0.1212	1.94e-06	3669	Lymphocyte %leukocyte	22.7072	0.00615419
rs2434066	A	C	-0.1678	0.03561	2.56e-06	3669	Lymphocyte %leukocyte	22.1923	0.0060155
rs481252	T	C	-0.1204	0.02432	7.68e-07	3669	Lymphocyte %leukocyte	24.4957	0.0066357
rs56275163	A	C	-0.1185	0.02462	1.55e-06	3669	Lymphocyte %leukocyte	23.1539	0.0062745
rs61415458	T	C	-0.1561	0.03387	4.17e-06	3669	Lymphocyte %leukocyte	21.2294	0.005756
rs62264159	T	G	-0.387	0.08619	7.33e-06	3669	Lymphocyte %leukocyte	20.1498	0.00546488
rs6701133	T	C	-0.1167	0.02457	2.1e-06	3669	Lymphocyte %leukocyte	22.5473	0.00611113
rs67017818	A	G	0.1869	0.04147	6.75e-06	3669	Lymphocyte %leukocyte	20.3008	0.00550561
rs7006104	C	T	-1.181	0.2545	3.61e-06	3669	Lymphocyte %leukocyte	21.5222	0.00583492
rs74346935	G	A	0.1396	0.02964	2.59e-06	3669	Lymphocyte %leukocyte	22.1706	0.00600965
rs76019287	T	C	2.357	0.5308	9.26e-06	3669	Lymphocyte %leukocyte	19.707	0.00534542
rs77650974	G	A	-0.1502	0.02624	1.12e-08	3669	Lymphocyte %leukocyte	32.7473	0.00885122
rs78277075	A	G	0.3672	0.07923	3.71e-06	3669	Lymphocyte %leukocyte	21.4679	0.00582027
rs8177701	A	G	0.2002	0.04446	6.93e-06	3669	Lymphocyte %leukocyte	20.2653	0.00549602
rs893978	C	T	0.3946	0.08047	9.79e-07	3669	Lymphocyte %leukocyte	24.0331	0.00651121
rs11702153	C	T	0.1568	0.03447	5.55e-06	3653	T cell Absolute Count	20.681	0.00563257
rs117391590	G	A	-0.2678	0.06035	9.4e-06	3653	T cell Absolute Count	19.6802	0.00536145
rs1550856	A	G	-0.1325	0.0295	7.32e-06	3653	T cell Absolute Count	20.1628	0.0054922
rs17339549	G	A	0.1161	0.02516	4.12e-06	3653	T cell Absolute Count	21.2817	0.00579521
rs3184504	T	C	-0.1468	0.02633	2.65e-08	3653	T cell Absolute Count	31.0679	0.00843764
rs35669214	T	C	-0.1231	0.02758	8.31e-06	3653	T cell Absolute Count	19.9108	0.00542395
rs414743	G	A	0.1311	0.02887	5.74e-06	3653	T cell Absolute Count	20.6098	0.00561329
rs62447160	T	C	-0.1152	0.02524	5.12e-06	3653	T cell Absolute Count	20.8204	0.00567031
rs72960548	T	C	0.2563	0.04796	9.62e-08	3653	T cell Absolute Count	28.5431	0.00775724
rs75308045	A	G	-0.1332	0.02697	8.25e-07	3653	T cell Absolute Count	24.3786	0.00663295
rs75995320	G	A	-0.4299	0.08871	1.31e-06	3653	T cell Absolute Count	23.4721	0.00638788
rs76560336	C	T	-0.6975	0.1553	7.33e-06	3653	T cell Absolute Count	20.1608	0.00549167
rs9271622	G	A	0.2154	0.03382	2.14e-10	3653	T cell Absolute Count	40.5421	0.0109824
rs10868215	T	C	-0.1205	0.02509	1.63e-06	3669	T cell %lymphocyte	23.0535	0.00624746
rs11870294	A	C	0.1234	0.02715	5.69e-06	3669	T cell %lymphocyte	20.6469	0.00559892
rs149528313	G	A	0.3387	0.0677	5.94e-07	3669	T cell %lymphocyte	25.0159	0.00677568
rs17615220	A	G	-0.1588	0.03288	1.42e-06	3669	T cell %lymphocyte	23.3131	0.00631739
rs1874323	T	C	-0.157	0.03445	5.39e-06	3669	T cell %lymphocyte	20.7579	0.00562888
rs241580	A	G	-0.2806	0.06288	8.36e-06	3669	T cell %lymphocyte	19.9028	0.00539823
rs34147569	T	C	0.1298	0.02927	9.5e-06	3669	T cell %lymphocyte	19.6547	0.00533132
rs4758148	A	G	-0.2706	0.05918	4.97e-06	3669	T cell %lymphocyte	20.8963	0.00566618
rs55972028	C	T	0.1697	0.03719	5.17e-06	3669	T cell %lymphocyte	20.8101	0.00564295
rs62096695	T	G	0.3394	0.0756	7.37e-06	3669	T cell %lymphocyte	20.1439	0.00546328
rs735609	G	T	0.2301	0.04345	1.25e-07	3669	T cell %lymphocyte	28.0296	0.00758576
rs7864642	G	T	0.2854	0.05679	5.24e-07	3669	T cell %lymphocyte	25.2422	0.00683655
rs9916257	G	T	0.1918	0.02391	1.41e-15	3669	T cell %lymphocyte	64.3134	0.0172361
rs112432445	G	A	0.2796	0.05583	5.77e-07	3656	IgD- CD27- B cell Absolute Count	25.0669	0.0068134
rs113442137	G	A	-0.2567	0.05748	8.21e-06	3656	IgD- CD27- B cell Absolute Count	19.9334	0.00542562
rs11661511	T	C	-0.1204	0.02636	5.04e-06	3656	IgD- CD27- B cell Absolute Count	20.8509	0.00567394
rs11688492	T	C	-0.1216	0.02504	1.24e-06	3656	IgD- CD27- B cell Absolute Count	23.5701	0.00640914
rs117833074	T	C	-0.1795	0.0403	8.65e-06	3656	IgD- CD27- B cell Absolute Count	19.8281	0.00539712
rs11843493	A	C	-0.1109	0.02482	8.2e-06	3656	IgD- CD27- B cell Absolute Count	19.9536	0.00543111
rs12129123	C	T	-0.1387	0.0309	7.36e-06	3656	IgD- CD27- B cell Absolute Count	20.1372	0.00548079
rs13099360	A	G	-0.263	0.05944	9.96e-06	3656	IgD- CD27- B cell Absolute Count	19.5666	0.00532633
rs144306835	G	A	0.3826	0.07964	1.62e-06	3656	IgD- CD27- B cell Absolute Count	23.0669	0.00627319
rs185621536	C	T	-0.3205	0.07004	4.89e-06	3656	IgD- CD27- B cell Absolute Count	20.9279	0.00569478
rs2250246	A	G	0.1359	0.02451	3.13e-08	3656	IgD- CD27- B cell Absolute Count	30.7266	0.00833891
rs35574803	T	C	-0.2808	0.05393	2.02e-07	3656	IgD- CD27- B cell Absolute Count	27.0954	0.00736069
rs421516	C	A	-0.2897	0.0627	3.97e-06	3656	IgD- CD27- B cell Absolute Count	21.3366	0.00580533
rs4239702	T	C	0.2841	0.02593	1.64e-27	3656	IgD- CD27- B cell Absolute Count	119.977	0.0317907
rs61786059	G	T	-0.1238	0.02692	4.45e-06	3656	IgD- CD27- B cell Absolute Count	21.1375	0.00575148
rs74356874	G	A	0.6631	0.1462	5.96e-06	3656	IgD- CD27- B cell Absolute Count	20.5601	0.00559526
rs7518494	G	A	0.2278	0.04884	3.21e-06	3656	IgD- CD27- B cell Absolute Count	21.743	0.00591525
rs77126700	T	C	0.3825	0.08026	1.95e-06	3656	IgD- CD27- B cell Absolute Count	22.7001	0.00617403
rs78763642	G	A	-0.3304	0.07442	9.28e-06	3656	IgD- CD27- B cell Absolute Count	19.6999	0.0053624
rs9615714	A	G	-0.1733	0.03486	6.95e-07	3656	IgD- CD27- B cell Absolute Count	24.7004	0.00671445
rs12426383	A	G	-0.1498	0.03294	5.58e-06	3669	T cell %leukocyte	20.67	0.00560515
rs150146725	T	C	-0.3712	0.07717	1.57e-06	3669	T cell %leukocyte	23.125	0.00626673
rs1501750	A	G	0.2324	0.05021	3.79e-06	3669	T cell %leukocyte	21.4119	0.00580518
rs1609355	A	G	-0.298	0.06568	5.88e-06	3669	T cell %leukocyte	20.5745	0.00557941
rs16908368	G	T	0.2667	0.05622	2.18e-06	3669	T cell %leukocyte	22.492	0.00609622
rs184624056	A	G	-0.5583	0.1177	2.18e-06	3669	T cell %leukocyte	22.4877	0.00609508
rs4325897	A	C	0.1521	0.03304	4.27e-06	3669	T cell %leukocyte	21.1808	0.00574287
rs4614661	C	A	-0.1711	0.03528	1.28e-06	3669	T cell %leukocyte	23.5075	0.00636971
rs481252	T	C	-0.1094	0.02363	3.77e-06	3669	T cell %leukocyte	21.4225	0.00580804
rs76019287	T	C	2.39	0.5154	3.66e-06	3669	T cell %leukocyte	21.4917	0.00582668
rs76320442	C	T	-0.4555	0.09611	2.23e-06	3669	T cell %leukocyte	22.4493	0.00608473
rs77650974	G	A	-0.1147	0.02553	7.17e-06	3669	T cell %leukocyte	20.1738	0.00547135
rs78641454	C	T	-0.2644	0.05804	5.4e-06	3669	T cell %leukocyte	20.7411	0.00562433
rs893978	C	T	0.4193	0.0781	8.44e-08	3669	T cell %leukocyte	28.8079	0.00779474
rs9916629	T	C	0.1172	0.02379	8.77e-07	3669	T cell %leukocyte	24.2566	0.00657136
rs112782656	G	A	-0.3174	0.07133	8.89e-06	3668	CD4+ T cell %leukocyte	19.7894	0.00536911
rs114905473	T	C	-0.2375	0.05181	4.69e-06	3668	CD4+ T cell %leukocyte	21.0021	0.00569626
rs116160694	T	C	0.6955	0.1503	3.82e-06	3668	CD4+ T cell %leukocyte	21.4013	0.00580389
rs118114356	G	T	0.4689	0.1054	8.97e-06	3668	CD4+ T cell %leukocyte	19.7807	0.00536677
rs13210358	C	T	-0.3968	0.07123	2.73e-08	3668	CD4+ T cell %leukocyte	31.0156	0.00838937
rs1830888	C	A	0.1268	0.02751	4.18e-06	3668	CD4+ T cell %leukocyte	21.2334	0.00575864
rs2003177	A	G	0.1408	0.03172	9.33e-06	3668	CD4+ T cell %leukocyte	19.6926	0.00534297
rs56157148	T	G	0.1421	0.0321	9.88e-06	3668	CD4+ T cell %leukocyte	19.5858	0.00531416
rs60704551	A	C	0.5316	0.1191	8.36e-06	3668	CD4+ T cell %leukocyte	19.9118	0.00540212
rs62048802	A	G	0.1177	0.02457	1.74e-06	3668	CD4+ T cell %leukocyte	22.9354	0.00621734
rs798726	T	C	-0.1399	0.02944	2.09e-06	3668	CD4+ T cell %leukocyte	22.5696	0.00611878
rs912657	A	G	0.123	0.02749	7.88e-06	3668	CD4+ T cell %leukocyte	20.0089	0.00542835
rs10990269	C	T	0.1145	0.0258	9.36e-06	3668	CD8+ T cell %leukocyte	19.685	0.00534093
rs11080350	C	T	-0.1371	0.02524	5.92e-08	3668	CD8+ T cell %leukocyte	29.489	0.00797972
rs11163186	C	A	0.3831	0.08381	5.01e-06	3668	CD8+ T cell %leukocyte	20.8831	0.00566417
rs115924617	C	T	-0.3892	0.08632	6.73e-06	3668	CD8+ T cell %leukocyte	20.3182	0.0055118
rs3130685	C	T	0.1801	0.02952	1.16e-09	3668	CD8+ T cell %leukocyte	37.2013	0.0100457
rs3804348	C	A	0.2966	0.06161	1.54e-06	3668	CD8+ T cell %leukocyte	23.1634	0.00627878
rs3829858	A	G	0.1164	0.025	3.35e-06	3668	CD8+ T cell %leukocyte	21.6665	0.0058754
rs62130076	G	A	0.1147	0.02563	7.78e-06	3668	CD8+ T cell %leukocyte	20.0167	0.00543045
rs62458311	G	A	0.2722	0.05919	4.39e-06	3668	CD8+ T cell %leukocyte	21.137	0.00573262
rs6986151	T	C	0.1831	0.03986	4.53e-06	3668	CD8+ T cell %leukocyte	21.0894	0.00571981
rs73207267	G	A	0.1636	0.03665	8.36e-06	3668	CD8+ T cell %leukocyte	19.9151	0.00540302
rs78326687	C	A	-0.1555	0.03309	2.71e-06	3668	CD8+ T cell %leukocyte	22.0714	0.00598454
rs11025036	G	A	-0.4277	0.08196	1.91e-07	3668	CD4+CD8+ T cell %leukocyte	27.2168	0.00736941
rs117166897	A	G	-0.2423	0.05329	5.63e-06	3668	CD4+CD8+ T cell %leukocyte	20.6623	0.00560461
rs117340321	G	T	-0.2528	0.05364	2.54e-06	3668	CD4+CD8+ T cell %leukocyte	22.1993	0.00601901
rs147688743	G	A	-0.4693	0.09847	1.96e-06	3668	CD4+CD8+ T cell %leukocyte	22.7016	0.00615436
rs16987794	T	C	-0.1599	0.03427	3.2e-06	3668	CD4+CD8+ T cell %leukocyte	21.7586	0.00590024
rs28459093	C	T	-0.232	0.05143	6.64e-06	3668	CD4+CD8+ T cell %leukocyte	20.3379	0.0055171
rs2857229	A	G	0.2919	0.02741	4.29e-26	3668	CD4+CD8+ T cell %leukocyte	113.348	0.0299914
rs2983457	A	G	0.1097	0.0245	7.8e-06	3668	CD4+CD8+ T cell %leukocyte	20.0375	0.00543606
rs3759343	T	C	-0.1259	0.02665	2.42e-06	3668	CD4+CD8+ T cell %leukocyte	22.3059	0.00604774
rs45551732	C	T	0.342	0.07212	2.2e-06	3668	CD4+CD8+ T cell %leukocyte	22.4752	0.00609336
rs4966346	A	G	-0.1172	0.02542	4.2e-06	3668	CD4+CD8+ T cell %leukocyte	21.2455	0.00576189
rs55928872	G	A	-0.6422	0.1446	9.19e-06	3668	CD4+CD8+ T cell %leukocyte	19.7137	0.00534867
rs6022045	T	C	-0.1148	0.02488	4.03e-06	3668	CD4+CD8+ T cell %leukocyte	21.2788	0.00577086
rs62022846	T	C	-0.2752	0.05788	2.07e-06	3668	CD4+CD8+ T cell %leukocyte	22.5945	0.00612551
rs7160965	T	C	0.2018	0.03941	3.21e-07	3668	CD4+CD8+ T cell %leukocyte	26.2055	0.00709752
rs72694502	T	C	-0.3724	0.08217	6.04e-06	3668	CD4+CD8+ T cell %leukocyte	20.5284	0.0055685
rs76251345	T	G	0.2442	0.05195	2.68e-06	3668	CD4+CD8+ T cell %leukocyte	22.0843	0.00598801
rs7786572	T	C	0.3038	0.06815	8.55e-06	3668	CD4+CD8+ T cell %leukocyte	19.8613	0.0053885
rs77965313	A	C	-0.2978	0.06501	4.76e-06	3668	CD4+CD8+ T cell %leukocyte	20.9726	0.0056883
rs10880825	C	A	0.1208	0.02514	1.6e-06	3652	CD4+ CD8dim T cell Absolute Count	23.0763	0.00628254
rs116684688	G	A	0.3058	0.06743	5.95e-06	3652	CD4+ CD8dim T cell Absolute Count	20.5556	0.00560014
rs12422526	T	C	-0.1147	0.02516	5.28e-06	3652	CD4+ CD8dim T cell Absolute Count	20.7715	0.00565862
rs150339178	C	T	-0.3114	0.05886	1.29e-07	3652	CD4+ CD8dim T cell Absolute Count	27.9743	0.00760589
rs2706889	T	C	0.1188	0.02647	7.35e-06	3652	CD4+ CD8dim T cell Absolute Count	20.132	0.00548536
rs2801996	T	C	0.1545	0.0317	1.14e-06	3652	CD4+ CD8dim T cell Absolute Count	23.7411	0.00646237
rs2810499	T	G	0.1417	0.03197	9.52e-06	3652	CD4+ CD8dim T cell Absolute Count	19.6343	0.00535049
rs35046345	C	T	-0.278	0.05685	1.05e-06	3652	CD4+ CD8dim T cell Absolute Count	23.8996	0.00650524
rs4699432	C	T	0.1172	0.02604	6.97e-06	3652	CD4+ CD8dim T cell Absolute Count	20.2458	0.0055162
rs4959028	A	G	0.2258	0.03391	3.19e-11	3652	CD4+ CD8dim T cell Absolute Count	44.3154	0.0119956
rs5030065	T	C	0.5828	0.1317	9.94e-06	3652	CD4+ CD8dim T cell Absolute Count	19.5717	0.00533352
rs7109274	G	A	0.8964	0.1967	5.37e-06	3652	CD4+ CD8dim T cell Absolute Count	20.7566	0.00565459
rs78510378	A	G	0.2145	0.04168	2.8e-07	3652	CD4+ CD8dim T cell Absolute Count	26.4704	0.00719996
rs10513789	T	G	0.1323	0.0295	7.52e-06	3656	IgD+ CD24+ B cell Absolute Count	20.1019	0.00547125
rs10942726	A	G	0.1176	0.02628	7.86e-06	3656	IgD+ CD24+ B cell Absolute Count	20.0136	0.00544735
rs11047113	A	C	-0.1831	0.04029	5.67e-06	3656	IgD+ CD24+ B cell Absolute Count	20.6417	0.00561732
rs11653761	G	T	-0.125	0.02429	2.83e-07	3656	IgD+ CD24+ B cell Absolute Count	26.4684	0.00719158
rs12595433	G	A	-0.1118	0.02462	5.8e-06	3656	IgD+ CD24+ B cell Absolute Count	20.6096	0.00560865
rs12874404	A	G	0.1963	0.02601	5.62e-14	3656	IgD+ CD24+ B cell Absolute Count	56.9275	0.0153405
rs13132141	G	A	-0.1191	0.02557	3.3e-06	3656	IgD+ CD24+ B cell Absolute Count	21.6833	0.00589911
rs144607178	C	T	0.2175	0.0491	9.71e-06	3656	IgD+ CD24+ B cell Absolute Count	19.6118	0.00533857
rs145371905	G	T	0.4292	0.08767	1.02e-06	3656	IgD+ CD24+ B cell Absolute Count	23.9541	0.00651289
rs147556975	C	T	-0.3012	0.06251	1.51e-06	3656	IgD+ CD24+ B cell Absolute Count	23.2046	0.00631038
rs183466766	G	A	0.3121	0.06005	2.14e-07	3656	IgD+ CD24+ B cell Absolute Count	26.9975	0.00733429
rs4702913	A	C	0.197	0.04215	3.08e-06	3656	IgD+ CD24+ B cell Absolute Count	21.8323	0.00593942
rs7254039	G	A	-0.2566	0.05765	8.81e-06	3656	IgD+ CD24+ B cell Absolute Count	19.8005	0.00538966
rs7586359	T	G	-0.1868	0.03837	1.17e-06	3656	IgD+ CD24+ B cell Absolute Count	23.6882	0.00644106
rs8014978	T	C	-0.1136	0.02446	3.57e-06	3656	IgD+ CD24+ B cell Absolute Count	21.5579	0.0058652
rs880312	G	A	-0.1821	0.03971	4.68e-06	3656	IgD+ CD24+ B cell Absolute Count	21.0176	0.00571904
rs9314892	A	G	-0.1608	0.03478	3.93e-06	3656	IgD+ CD24+ B cell Absolute Count	21.3636	0.00581266
rs9614226	T	G	-0.4122	0.08546	1.47e-06	3656	IgD+ CD24+ B cell Absolute Count	23.2516	0.00632309
rs10858526	C	A	-0.1117	0.02458	5.65e-06	3668	CD4+ CD8dim T cell %lymphocyte	20.6398	0.00559854
rs10880825	C	A	0.1156	0.02452	2.52e-06	3668	CD4+ CD8dim T cell %lymphocyte	22.2146	0.00602312
rs147195040	G	A	0.2782	0.0623	8.24e-06	3668	CD4+ CD8dim T cell %lymphocyte	19.9297	0.00540697
rs149551255	A	C	0.8104	0.1808	7.61e-06	3668	CD4+ CD8dim T cell %lymphocyte	20.0801	0.00544754
rs150339178	C	T	-0.299	0.05744	2.05e-07	3668	CD4+ CD8dim T cell %lymphocyte	27.0817	0.0073331
rs17530643	A	G	0.138	0.03106	9.12e-06	3668	CD4+ CD8dim T cell %lymphocyte	19.7296	0.00535297
rs2338695	C	T	0.1116	0.02495	7.9e-06	3668	CD4+ CD8dim T cell %lymphocyte	19.9963	0.00542495
rs2816843	A	G	0.1599	0.03009	1.15e-07	3668	CD4+ CD8dim T cell %lymphocyte	28.2238	0.00763998
rs28521508	A	G	-0.119	0.02626	6.03e-06	3668	CD4+ CD8dim T cell %lymphocyte	20.5243	0.00556738
rs4833069	C	T	-0.5696	0.1283	9.25e-06	3668	CD4+ CD8dim T cell %lymphocyte	19.6993	0.00534478
rs4959028	A	G	0.2877	0.03253	1.41e-18	3668	CD4+ CD8dim T cell %lymphocyte	78.1762	0.0208794
rs511713	G	A	0.114	0.02453	3.46e-06	3668	CD4+ CD8dim T cell %lymphocyte	21.5863	0.00585377
rs6870700	G	T	0.3761	0.08411	7.98e-06	3668	CD4+ CD8dim T cell %lymphocyte	19.9836	0.00542152
rs78510378	A	G	0.2039	0.04066	5.58e-07	3668	CD4+ CD8dim T cell %lymphocyte	25.1341	0.00680931
rs79131379	G	A	0.2491	0.04987	6.16e-07	3668	CD4+ CD8dim T cell %lymphocyte	24.9363	0.00675609
rs903881	C	T	-0.1247	0.02641	2.43e-06	3668	CD4+ CD8dim T cell %lymphocyte	22.2823	0.00604137
rs10858526	C	A	-0.116	0.02467	2.66e-06	3668	CD4+ CD8dim T cell %leukocyte	22.0974	0.00599154
rs10880825	C	A	0.1141	0.02461	3.67e-06	3668	CD4+ CD8dim T cell %leukocyte	21.4838	0.00582614
rs114200183	C	T	-0.2017	0.0443	5.49e-06	3668	CD4+ CD8dim T cell %leukocyte	20.7189	0.00561989
rs150339178	C	T	-0.3086	0.05764	9.12e-08	3668	CD4+ CD8dim T cell %leukocyte	28.6488	0.00775414
rs17530643	A	G	0.1391	0.03118	8.41e-06	3668	CD4+ CD8dim T cell %leukocyte	19.8914	0.00539663
rs2801996	T	C	0.165	0.03104	1.13e-07	3668	CD4+ CD8dim T cell %leukocyte	28.2415	0.00764473
rs28521508	A	G	-0.1187	0.02636	6.84e-06	3668	CD4+ CD8dim T cell %leukocyte	20.2663	0.00549778
rs4959028	A	G	0.2689	0.0327	2.73e-16	3668	CD4+ CD8dim T cell %leukocyte	67.5848	0.0181019
rs511713	G	A	0.1163	0.02462	2.41e-06	3668	CD4+ CD8dim T cell %leukocyte	22.3021	0.00604672
rs78510378	A	G	0.2104	0.0408	2.67e-07	3668	CD4+ CD8dim T cell %leukocyte	26.5787	0.00719788
rs79131379	G	A	0.2465	0.05006	8.9e-07	3668	CD4+ CD8dim T cell %leukocyte	24.2335	0.00656692
rs903881	C	T	-0.1247	0.02651	2.63e-06	3668	CD4+ CD8dim T cell %leukocyte	22.1145	0.00599615
rs111748563	A	G	0.2703	0.057	2.2e-06	3668	CD8dim T cell %leukocyte	22.4753	0.00609339
rs112505246	T	C	0.2425	0.04608	1.5e-07	3668	CD8dim T cell %leukocyte	27.6797	0.00749381
rs11676464	G	A	-0.1769	0.03963	8.27e-06	3668	CD8dim T cell %leukocyte	19.9146	0.00540288
rs12871857	C	T	-0.2405	0.05208	4.01e-06	3668	CD8dim T cell %leukocyte	21.3133	0.00578018
rs139249541	A	G	0.5228	0.07237	6.1e-13	3668	CD8dim T cell %leukocyte	52.1575	0.0140278
rs143576769	C	T	-0.2522	0.05621	7.49e-06	3668	CD8dim T cell %leukocyte	20.1199	0.00545829
rs148468972	A	G	2.041	0.4597	9.3e-06	3668	CD8dim T cell %leukocyte	19.7015	0.0053454
rs2937553	A	G	-0.1298	0.02605	6.57e-07	3668	CD8dim T cell %leukocyte	24.814	0.00672318
rs34740679	G	A	0.1531	0.03448	9.22e-06	3668	CD8dim T cell %leukocyte	19.7051	0.00534636
rs60409696	C	T	0.3554	0.07361	1.44e-06	3668	CD8dim T cell %leukocyte	23.2983	0.0063151
rs62287820	A	G	0.4434	0.09405	2.51e-06	3668	CD8dim T cell %leukocyte	22.2145	0.00602311
rs76747637	G	A	0.6971	0.1555	7.6e-06	3668	CD8dim T cell %leukocyte	20.086	0.00544913
rs77148456	G	A	-0.5911	0.1248	2.25e-06	3668	CD8dim T cell %leukocyte	22.421	0.00607877
rs79086781	C	T	0.471	0.06515	5.86e-13	3668	CD8dim T cell %leukocyte	52.2367	0.0140488
rs8022863	A	G	0.1228	0.0274	7.62e-06	3668	CD8dim T cell %leukocyte	20.0751	0.00544621
rs9916257	G	T	0.1342	0.0248	6.63e-08	3668	CD8dim T cell %leukocyte	29.2661	0.00791989
rs11103734	C	T	0.2397	0.05249	5.12e-06	3668	CD4-CD8- T cell %leukocyte	20.8423	0.00565316
rs11124150	A	G	-0.115	0.02449	2.76e-06	3668	CD4-CD8- T cell %leukocyte	22.0385	0.00597566
rs11180778	T	C	0.1276	0.02655	1.59e-06	3668	CD4-CD8- T cell %leukocyte	23.0853	0.00625773
rs139015432	C	T	0.1647	0.03682	7.92e-06	3668	CD4-CD8- T cell %leukocyte	19.9978	0.00542535
rs139249541	A	G	0.415	0.06958	2.69e-09	3668	CD4-CD8- T cell %leukocyte	35.5542	0.0096052
rs140247402	C	T	-0.2405	0.05402	8.81e-06	3668	CD4-CD8- T cell %leukocyte	19.81	0.00537466
rs142716558	A	G	0.1595	0.03557	7.57e-06	3668	CD4-CD8- T cell %leukocyte	20.0963	0.00545193
rs185860761	C	T	-0.232	0.05067	4.82e-06	3668	CD4-CD8- T cell %leukocyte	20.9526	0.0056829
rs2177640	C	A	0.1255	0.02791	7.15e-06	3668	CD4-CD8- T cell %leukocyte	20.2084	0.00548215
rs34025101	A	G	1.393	0.3109	7.65e-06	3668	CD4-CD8- T cell %leukocyte	20.0643	0.00544328
rs4711821	G	A	0.1299	0.02637	8.73e-07	3668	CD4-CD8- T cell %leukocyte	24.2528	0.00657211
rs62176864	A	C	2.323	0.5063	4.62e-06	3668	CD4-CD8- T cell %leukocyte	21.04	0.00570647
rs7021333	T	G	-0.1191	0.02377	5.66e-07	3668	CD4-CD8- T cell %leukocyte	25.0916	0.00679788
rs72784218	G	A	0.2265	0.0496	5.11e-06	3668	CD4-CD8- T cell %leukocyte	20.8418	0.00565304
rs7569868	C	T	0.2327	0.0304	2.49e-14	3668	CD4-CD8- T cell %leukocyte	58.561	0.0157229
rs76747637	G	A	0.681	0.1489	4.94e-06	3668	CD4-CD8- T cell %leukocyte	20.9059	0.0056703
rs7869045	G	A	-0.2505	0.05618	8.48e-06	3668	CD4-CD8- T cell %leukocyte	19.8708	0.00539107
rs79251210	G	A	0.3543	0.06302	2.02e-08	3668	CD4-CD8- T cell %leukocyte	31.5899	0.00854338
rs9896155	A	G	0.1408	0.02517	2.39e-08	3668	CD4-CD8- T cell %leukocyte	31.2753	0.00845902
rs11109601	T	C	0.5039	0.1105	5.27e-06	3437	Activated & resting CD4 regulatory T cell %CD4+ T cell	20.7831	0.00601402
rs113376235	C	A	0.352	0.07659	4.45e-06	3437	Activated & resting CD4 regulatory T cell %CD4+ T cell	21.11	0.00610803
rs116517602	C	T	1.465	0.1852	3.39e-15	3437	Activated & resting CD4 regulatory T cell %CD4+ T cell	62.5375	0.0178804
rs116794175	T	C	0.9735	0.1912	3.75e-07	3437	Activated & resting CD4 regulatory T cell %CD4+ T cell	25.9086	0.00748606
rs12133465	A	G	0.5817	0.1262	4.15e-06	3437	Activated & resting CD4 regulatory T cell %CD4+ T cell	21.2337	0.00614361
rs1247730	C	T	0.1384	0.02948	2.79e-06	3437	Activated & resting CD4 regulatory T cell %CD4+ T cell	22.0275	0.00637179
rs13006059	A	G	-0.1319	0.02909	5.93e-06	3437	Activated & resting CD4 regulatory T cell %CD4+ T cell	20.547	0.0059461
rs13410035	C	T	-0.2939	0.06565	7.82e-06	3437	Activated & resting CD4 regulatory T cell %CD4+ T cell	20.0298	0.00579729
rs1371033	T	C	-0.1467	0.03282	8.08e-06	3437	Activated & resting CD4 regulatory T cell %CD4+ T cell	19.9678	0.00577945
rs137997033	C	T	1.044	0.2291	5.35e-06	3437	Activated & resting CD4 regulatory T cell %CD4+ T cell	20.7538	0.00600558
rs145165211	G	A	-0.5131	0.1022	5.39e-07	3437	Activated & resting CD4 regulatory T cell %CD4+ T cell	25.1912	0.0072803
rs180839256	T	C	0.6241	0.1397	8.21e-06	3437	Activated & resting CD4 regulatory T cell %CD4+ T cell	19.9463	0.00577326
rs461709	G	A	-0.1276	0.02704	2.47e-06	3437	Activated & resting CD4 regulatory T cell %CD4+ T cell	22.2554	0.0064373
rs514150	T	C	-0.1167	0.02507	3.37e-06	3437	Activated & resting CD4 regulatory T cell %CD4+ T cell	21.6561	0.00626504
rs60174426	T	C	-0.1207	0.02721	9.5e-06	3437	Activated & resting CD4 regulatory T cell %CD4+ T cell	19.6655	0.00569244
rs61924635	T	C	0.7724	0.1664	3.59e-06	3437	Activated & resting CD4 regulatory T cell %CD4+ T cell	21.534	0.00622995
rs62285107	C	T	-0.1995	0.04243	2.67e-06	3437	Activated & resting CD4 regulatory T cell %CD4+ T cell	22.0946	0.0063911
rs62390348	C	T	0.5437	0.1176	3.9e-06	3437	Activated & resting CD4 regulatory T cell %CD4+ T cell	21.3625	0.00618062
rs6751481	T	C	0.2086	0.02476	5.19e-17	3437	Activated & resting CD4 regulatory T cell %CD4+ T cell	70.9373	0.0202335
rs73009664	T	C	0.459	0.1	4.6e-06	3437	Activated & resting CD4 regulatory T cell %CD4+ T cell	21.0558	0.00609245
rs76225340	G	T	0.3934	0.08591	4.82e-06	3437	Activated & resting CD4 regulatory T cell %CD4+ T cell	20.957	0.00606401
rs76882749	T	C	-0.4841	0.1026	2.48e-06	3437	Activated & resting CD4 regulatory T cell %CD4+ T cell	22.2496	0.00643564
rs11080350	C	T	-0.1548	0.0252	9.08e-10	3668	CD8+ and CD8dim T cell %leukocyte	37.7141	0.0101828
rs118063063	C	T	0.4447	0.08957	7.19e-07	3668	CD8+ and CD8dim T cell %leukocyte	24.6361	0.0066753
rs2275854	A	G	0.1546	0.03108	6.87e-07	3668	CD8+ and CD8dim T cell %leukocyte	24.7298	0.00670051
rs3804348	C	A	0.2864	0.06161	3.46e-06	3668	CD8+ and CD8dim T cell %leukocyte	21.5977	0.00585684
rs4796452	C	T	-0.128	0.02889	9.64e-06	3668	CD8+ and CD8dim T cell %leukocyte	19.6195	0.00532326
rs62458311	G	A	0.2907	0.05915	9.26e-07	3668	CD8+ and CD8dim T cell %leukocyte	24.1404	0.00654185
rs6595142	C	T	-0.1289	0.02849	6.27e-06	3668	CD8+ and CD8dim T cell %leukocyte	20.459	0.00554977
rs6849514	C	T	0.1093	0.02437	7.53e-06	3668	CD8+ and CD8dim T cell %leukocyte	20.1045	0.00545412
rs6986151	T	C	0.1822	0.03985	4.99e-06	3668	CD8+ and CD8dim T cell %leukocyte	20.8931	0.00566686
rs73162393	C	T	0.2044	0.04529	6.59e-06	3668	CD8+ and CD8dim T cell %leukocyte	20.3573	0.00552234
rs73402222	T	C	-0.1904	0.03241	4.59e-09	3668	CD8+ and CD8dim T cell %leukocyte	34.4936	0.00932136
rs76556848	C	T	0.4467	0.09907	6.71e-06	3668	CD8+ and CD8dim T cell %leukocyte	20.3194	0.00551211
rs78326687	C	A	-0.1514	0.03309	4.9e-06	3668	CD8+ and CD8dim T cell %leukocyte	20.9229	0.00567489
rs10850589	C	T	-0.1129	0.02418	3.15e-06	3650	TCRgd T cell Absolute Count	21.789	0.0059374
rs117810965	G	A	0.2763	0.06238	9.69e-06	3650	TCRgd T cell Absolute Count	19.608	0.00534626
rs11897347	T	C	0.154	0.03447	8.19e-06	3650	TCRgd T cell Absolute Count	19.949	0.00543873
rs139311612	T	C	-0.3512	0.07076	7.23e-07	3650	TCRgd T cell Absolute Count	24.6204	0.00670377
rs142067182	C	T	0.2644	0.05643	2.89e-06	3650	TCRgd T cell Absolute Count	21.9414	0.00597868
rs148395664	G	A	0.3857	0.08384	4.35e-06	3650	TCRgd T cell Absolute Count	21.1524	0.00576492
rs149000203	G	A	-0.3381	0.07544	7.63e-06	3650	TCRgd T cell Absolute Count	20.0747	0.00547282
rs35702634	G	A	0.2848	0.05856	1.2e-06	3650	TCRgd T cell Absolute Count	23.6396	0.00643843
rs3802329	C	A	0.1504	0.03066	9.75e-07	3650	TCRgd T cell Absolute Count	24.0499	0.00654945
rs558986	A	G	-0.1539	0.03343	4.28e-06	3650	TCRgd T cell Absolute Count	21.182	0.00577294
rs7192379	T	C	-0.1323	0.02955	7.86e-06	3650	TCRgd T cell Absolute Count	20.034	0.00546177
rs7194802	C	A	-0.1303	0.02779	2.85e-06	3650	TCRgd T cell Absolute Count	21.9722	0.00598702
rs73353488	G	A	-0.2867	0.0603	2.06e-06	3650	TCRgd T cell Absolute Count	22.5935	0.00615526
rs77743715	A	G	-0.8984	0.1802	6.45e-07	3650	TCRgd T cell Absolute Count	24.8423	0.00676378
rs8079417	T	G	-0.2623	0.0573	4.84e-06	3650	TCRgd T cell Absolute Count	20.9435	0.00570832
rs947107	T	C	-0.1373	0.02868	1.77e-06	3650	TCRgd T cell Absolute Count	22.9058	0.00623981
rs9912354	C	T	0.109	0.0245	8.78e-06	3650	TCRgd T cell Absolute Count	19.7826	0.00539361
rs9974788	G	A	0.4148	0.09106	5.4e-06	3650	TCRgd T cell Absolute Count	20.7388	0.00565285
rs10850589	C	T	-0.1159	0.02479	3.07e-06	3666	TCRgd T cell %T cell	21.8462	0.00592706
rs113438136	T	C	0.544	0.1166	3.16e-06	3666	TCRgd T cell %T cell	21.7552	0.00590252
rs113457024	T	C	0.1769	0.03843	4.3e-06	3666	TCRgd T cell %T cell	21.1777	0.00574671
rs116965753	G	T	-0.2303	0.0519	9.35e-06	3666	TCRgd T cell %T cell	19.6796	0.00534237
rs139311612	T	C	-0.3592	0.07241	7.37e-07	3666	TCRgd T cell %T cell	24.5945	0.00666772
rs149000203	G	A	-0.3645	0.07702	2.29e-06	3666	TCRgd T cell %T cell	22.3847	0.00607226
rs17224872	C	T	0.1178	0.02623	7.28e-06	3666	TCRgd T cell %T cell	20.1584	0.00547165
rs2094742	C	T	-0.1114	0.02498	8.52e-06	3666	TCRgd T cell %T cell	19.8769	0.00539565
rs320359	G	A	-0.2029	0.04454	5.38e-06	3666	TCRgd T cell %T cell	20.7409	0.00562885
rs35996042	G	A	-0.2557	0.05323	1.62e-06	3666	TCRgd T cell %T cell	23.0628	0.00625505
rs4952856	G	A	-0.1424	0.03	2.14e-06	3666	TCRgd T cell %T cell	22.5186	0.00610835
rs75122287	C	T	-0.7025	0.1568	7.66e-06	3666	TCRgd T cell %T cell	20.0615	0.00544549
rs76021379	T	C	-2.124	0.4358	1.14e-06	3666	TCRgd T cell %T cell	23.7409	0.0064378
rs7818691	T	G	0.1318	0.02571	3.12e-07	3666	TCRgd T cell %T cell	26.2657	0.00711757
rs80341165	C	T	-0.2419	0.05449	9.3e-06	3666	TCRgd T cell %T cell	19.697	0.00534709
rs10850589	C	T	-0.1115	0.0247	6.56e-06	3666	TCRgd T cell %lymphocyte	20.3666	0.00552785
rs113438136	T	C	0.5568	0.1161	1.68e-06	3666	TCRgd T cell %lymphocyte	22.9878	0.00623484
rs113457024	T	C	0.1762	0.03828	4.28e-06	3666	TCRgd T cell %lymphocyte	21.1754	0.00574609
rs139311612	T	C	-0.3562	0.07213	8.23e-07	3666	TCRgd T cell %lymphocyte	24.3736	0.00660821
rs149000203	G	A	-0.3616	0.07672	2.52e-06	3666	TCRgd T cell %lymphocyte	22.2025	0.00602315
rs150193285	C	T	1.831	0.4054	6.48e-06	3666	TCRgd T cell %lymphocyte	20.3879	0.00553359
rs174698	C	T	-2.379	0.5135	3.75e-06	3666	TCRgd T cell %lymphocyte	21.4522	0.00582077
rs2094742	C	T	-0.1129	0.02488	5.83e-06	3666	TCRgd T cell %lymphocyte	20.5802	0.0055855
rs35996042	G	A	-0.2417	0.05304	5.34e-06	3666	TCRgd T cell %lymphocyte	20.7544	0.00563249
rs4952856	G	A	-0.1411	0.02988	2.41e-06	3666	TCRgd T cell %lymphocyte	22.2872	0.00604598
rs72990536	G	A	-0.5993	0.1347	8.94e-06	3666	TCRgd T cell %lymphocyte	19.7841	0.00537059
rs76021379	T	C	-2.217	0.434	3.39e-07	3666	TCRgd T cell %lymphocyte	26.0804	0.00706772
rs7818691	T	G	0.1316	0.02561	2.9e-07	3666	TCRgd T cell %lymphocyte	26.391	0.00715127
rs840941	A	G	-0.1144	0.02545	7.2e-06	3666	TCRgd T cell %lymphocyte	20.1948	0.00548147
rs947107	T	C	-0.1407	0.02923	1.53e-06	3666	TCRgd T cell %lymphocyte	23.1576	0.00628061
rs9912354	C	T	0.112	0.02494	7.39e-06	3666	TCRgd T cell %lymphocyte	20.1561	0.00547102
rs111481219	C	T	-0.2209	0.04518	1.05e-06	3580	HLA DR+ T cell Absolute Count	23.8922	0.00663324
rs113649280	A	G	-0.945	0.2111	7.8e-06	3580	HLA DR+ T cell Absolute Count	20.0283	0.00556647
rs116844973	T	C	-0.1301	0.02935	9.57e-06	3580	HLA DR+ T cell Absolute Count	19.6379	0.00545856
rs117419608	G	A	-0.8376	0.1656	4.46e-07	3580	HLA DR+ T cell Absolute Count	25.5688	0.0070954
rs12627305	G	A	0.3836	0.07904	1.27e-06	3580	HLA DR+ T cell Absolute Count	23.5408	0.0065363
rs138213638	T	C	1.498	0.3269	4.74e-06	3580	HLA DR+ T cell Absolute Count	20.987	0.00583137
rs147577369	A	G	-0.6975	0.1566	8.65e-06	3580	HLA DR+ T cell Absolute Count	19.8272	0.00551089
rs2181036	T	C	-0.1628	0.02568	2.59e-10	3580	HLA DR+ T cell Absolute Count	40.1676	0.0111016
rs2808067	T	C	0.1218	0.02574	2.33e-06	3580	HLA DR+ T cell Absolute Count	22.3787	0.00621565
rs3087456	G	A	-0.4355	0.02736	3.62e-55	3580	HLA DR+ T cell Absolute Count	253.222	0.0660943
rs506151	C	T	-0.4072	0.08666	2.71e-06	3580	HLA DR+ T cell Absolute Count	22.0666	0.0061295
rs57068864	G	A	0.1944	0.04289	6.02e-06	3580	HLA DR+ T cell Absolute Count	20.5323	0.00570574
rs59231583	G	T	0.1302	0.0273	1.92e-06	3580	HLA DR+ T cell Absolute Count	22.7329	0.0063134
rs6686155	C	A	0.2208	0.04689	2.6e-06	3580	HLA DR+ T cell Absolute Count	22.1613	0.00615564
rs71312261	A	G	-0.4346	0.09717	7.98e-06	3580	HLA DR+ T cell Absolute Count	19.9927	0.00555664
rs72779785	A	G	-0.2015	0.03253	6.46e-10	3580	HLA DR+ T cell Absolute Count	38.3477	0.010604
rs7308816	G	T	-0.1373	0.03092	9.26e-06	3580	HLA DR+ T cell Absolute Count	19.7069	0.00547764
rs7504737	A	G	-0.1073	0.02408	8.58e-06	3580	HLA DR+ T cell Absolute Count	19.8447	0.00551571
rs7538103	G	A	-0.1261	0.02732	4.05e-06	3580	HLA DR+ T cell Absolute Count	21.2925	0.00591574
rs75799568	C	T	1.194	0.2523	2.3e-06	3580	HLA DR+ T cell Absolute Count	22.3837	0.00621703
rs76997602	A	G	-0.4158	0.08985	3.84e-06	3580	HLA DR+ T cell Absolute Count	21.4038	0.00594647
rs78648104	T	C	-0.1621	0.03311	1.02e-06	3580	HLA DR+ T cell Absolute Count	23.9555	0.00665069
rs79684162	C	T	0.4445	0.09604	3.81e-06	3580	HLA DR+ T cell Absolute Count	21.409	0.00594792
rs9391848	C	T	0.219	0.04824	5.81e-06	3580	HLA DR+ T cell Absolute Count	20.5983	0.00572397
rs9613063	C	T	-0.1428	0.03021	2.37e-06	3580	HLA DR+ T cell Absolute Count	22.3312	0.00620254
rs10244964	G	T	-1.414	0.3025	3.08e-06	3596	HLA DR+ T cell%T cell	21.8377	0.00603945
rs10788105	G	A	0.2157	0.04716	4.95e-06	3596	HLA DR+ T cell%T cell	20.9079	0.00578381
rs1084560	A	G	-0.1328	0.02309	9.71e-09	3596	HLA DR+ T cell%T cell	33.0603	0.0091149
rs112455120	C	T	0.3305	0.06617	6.15e-07	3596	HLA DR+ T cell%T cell	24.9333	0.00688967
rs116797692	G	A	-0.3105	0.07001	9.51e-06	3596	HLA DR+ T cell%T cell	19.659	0.00544019
rs117014352	C	T	-0.9683	0.2044	2.25e-06	3596	HLA DR+ T cell%T cell	22.4293	0.00620207
rs117941717	A	G	-0.5382	0.1202	7.82e-06	3596	HLA DR+ T cell%T cell	20.0372	0.00554427
rs12601032	G	A	-0.1065	0.02345	5.73e-06	3596	HLA DR+ T cell%T cell	20.6145	0.00570309
rs138213638	T	C	1.483	0.3068	1.39e-06	3596	HLA DR+ T cell%T cell	23.3523	0.00645564
rs138678763	T	C	-0.7017	0.1583	9.53e-06	3596	HLA DR+ T cell%T cell	19.6381	0.00543444
rs140410174	C	T	-0.2381	0.04814	7.9e-07	3596	HLA DR+ T cell%T cell	24.4492	0.00675682
rs145794521	G	A	2.031	0.4533	7.65e-06	3596	HLA DR+ T cell%T cell	20.0635	0.00555151
rs148323639	G	A	0.3143	0.06409	9.8e-07	3596	HLA DR+ T cell%T cell	24.0362	0.00664345
rs3087456	G	A	-0.4611	0.02546	3.08e-70	3596	HLA DR+ T cell%T cell	327.817	0.0835881
rs3104414	G	A	0.1693	0.0294	9.31e-09	3596	HLA DR+ T cell%T cell	33.1419	0.0091372
rs506151	C	T	-0.3833	0.08148	2.64e-06	3596	HLA DR+ T cell%T cell	22.1174	0.00611634
rs542160	C	T	-0.1125	0.02277	8.19e-07	3596	HLA DR+ T cell%T cell	24.3971	0.0067425
rs62068717	C	T	-0.3778	0.08451	8.05e-06	3596	HLA DR+ T cell%T cell	19.974	0.00552689
rs7032773	C	T	-0.1471	0.02426	1.46e-09	3596	HLA DR+ T cell%T cell	36.7453	0.0101206
rs7047722	G	A	0.1033	0.02322	8.94e-06	3596	HLA DR+ T cell%T cell	19.7804	0.0054736
rs7127620	A	G	0.1021	0.0228	7.74e-06	3596	HLA DR+ T cell%T cell	20.042	0.00554558
rs72779785	A	G	-0.1585	0.03056	2.25e-07	3596	HLA DR+ T cell%T cell	26.885	0.00742498
rs7294683	A	G	0.1028	0.02315	9.23e-06	3596	HLA DR+ T cell%T cell	19.708	0.00545368
rs73030989	C	T	1.729	0.3404	3.95e-07	3596	HLA DR+ T cell%T cell	25.7851	0.00712339
rs76997602	A	G	-0.3744	0.08384	8.21e-06	3596	HLA DR+ T cell%T cell	19.9309	0.00551503
rs78648104	T	C	-0.1411	0.03125	6.53e-06	3596	HLA DR+ T cell%T cell	20.3757	0.0056374
rs79132531	A	G	0.1937	0.04361	9.23e-06	3596	HLA DR+ T cell%T cell	19.7172	0.00545621
rs79178843	G	A	0.548	0.1157	2.25e-06	3596	HLA DR+ T cell%T cell	22.4209	0.00619974
rs9526689	G	A	0.4774	0.1065	7.56e-06	3596	HLA DR+ T cell%T cell	20.0828	0.00555681
rs111237501	T	C	1.055	0.2248	2.81e-06	3657	IgD- CD24- B cell %B cell	22.0128	0.00598659
rs112898282	T	C	0.4712	0.1007	2.97e-06	3657	IgD- CD24- B cell %B cell	21.8834	0.00595161
rs114209430	T	C	-0.6384	0.136	2.76e-06	3657	IgD- CD24- B cell %B cell	22.0227	0.00598927
rs11887461	A	G	0.1136	0.0249	5.25e-06	3657	IgD- CD24- B cell %B cell	20.8027	0.00565937
rs13020544	G	A	-2.752	0.5674	1.29e-06	3657	IgD- CD24- B cell %B cell	23.5115	0.00639158
rs142305616	A	C	0.466	0.1047	8.84e-06	3657	IgD- CD24- B cell %B cell	19.7989	0.00538775
rs145137909	G	A	-2.77	0.5672	1.09e-06	3657	IgD- CD24- B cell %B cell	23.8369	0.00647946
rs17044633	A	G	0.3561	0.07517	2.26e-06	3657	IgD- CD24- B cell %B cell	22.4294	0.0060992
rs183821560	G	A	-1.841	0.3885	2.25e-06	3657	IgD- CD24- B cell %B cell	22.4434	0.00610298
rs6073000	T	C	-0.3098	0.06272	8.16e-07	3657	IgD- CD24- B cell %B cell	24.3845	0.00662732
rs7198605	C	T	0.146	0.03204	5.38e-06	3657	IgD- CD24- B cell %B cell	20.7531	0.00564595
rs73045003	C	T	-0.1605	0.03611	9.04e-06	3657	IgD- CD24- B cell %B cell	19.745	0.00537317
rs76377003	A	G	-0.3971	0.08574	3.76e-06	3657	IgD- CD24- B cell %B cell	21.4385	0.00583133
rs7966251	G	A	0.1908	0.03619	1.43e-07	3657	IgD- CD24- B cell %B cell	27.7806	0.00754338
rs9398107	A	G	0.2678	0.0552	1.27e-06	3657	IgD- CD24- B cell %B cell	23.5237	0.00639487
rs10244964	G	T	-1.445	0.3106	3.43e-06	3596	HLA DR+ T cell%lymphocyte	21.6317	0.00598283
rs10787670	T	C	-0.1905	0.04198	5.86e-06	3596	HLA DR+ T cell%lymphocyte	20.5809	0.00569384
rs10788105	G	A	0.2367	0.04839	1.04e-06	3596	HLA DR+ T cell%lymphocyte	23.9135	0.00660976
rs1084560	A	G	-0.134	0.02371	1.73e-08	3596	HLA DR+ T cell%lymphocyte	31.9231	0.00880413
rs11070458	C	T	-0.5481	0.1239	9.97e-06	3596	HLA DR+ T cell%lymphocyte	19.5585	0.00541253
rs116797692	G	A	-0.3197	0.07188	8.95e-06	3596	HLA DR+ T cell%lymphocyte	19.7709	0.005471
rs117014352	C	T	-1.013	0.2098	1.44e-06	3596	HLA DR+ T cell%lymphocyte	23.3006	0.00644142
rs140410174	C	T	-0.2422	0.04942	9.96e-07	3596	HLA DR+ T cell%lymphocyte	24.005	0.00663486
rs146309290	T	C	-0.7231	0.1551	3.23e-06	3596	HLA DR+ T cell%lymphocyte	21.7236	0.00600809
rs148323639	G	A	0.3005	0.06583	5.16e-06	3596	HLA DR+ T cell%lymphocyte	20.8257	0.00576119
rs1863851	G	A	0.4087	0.09222	9.62e-06	3596	HLA DR+ T cell%lymphocyte	19.6299	0.00543218
rs2414178	T	C	-0.1296	0.02865	6.31e-06	3596	HLA DR+ T cell%lymphocyte	20.4512	0.00565818
rs3087456	G	A	-0.4689	0.02616	7.09e-69	3596	HLA DR+ T cell%lymphocyte	321.102	0.0820163
rs506151	C	T	-0.3761	0.08368	7.19e-06	3596	HLA DR+ T cell%lymphocyte	20.1893	0.00558613
rs542160	C	T	-0.1084	0.02338	3.7e-06	3596	HLA DR+ T cell%lymphocyte	21.4846	0.00594239
rs7032773	C	T	-0.1552	0.0249	5.15e-10	3596	HLA DR+ T cell%lymphocyte	38.8278	0.010688
rs72777888	G	A	0.341	0.06708	3.9e-07	3596	HLA DR+ T cell%lymphocyte	25.8274	0.00713499
rs72779785	A	G	-0.1718	0.03137	4.64e-08	3596	HLA DR+ T cell%lymphocyte	29.9761	0.00827162
rs7294683	A	G	0.106	0.02377	8.39e-06	3596	HLA DR+ T cell%lymphocyte	19.8752	0.00549969
rs73030989	C	T	1.618	0.3497	3.85e-06	3596	HLA DR+ T cell%lymphocyte	21.3956	0.00591791
rs76997602	A	G	-0.3991	0.08606	3.66e-06	3596	HLA DR+ T cell%lymphocyte	21.4941	0.005945
rs79178843	G	A	0.5526	0.1188	3.4e-06	3596	HLA DR+ T cell%lymphocyte	21.6246	0.00598086
rs9526689	G	A	0.5032	0.1093	4.3e-06	3596	HLA DR+ T cell%lymphocyte	21.1836	0.00585961
rs10256019	T	C	0.1838	0.04117	8.22e-06	3653	Natural Killer T Absolute Count	19.9201	0.00542646
rs10750486	G	A	0.1234	0.02678	4.19e-06	3653	Natural Killer T Absolute Count	21.2213	0.00577886
rs10765907	T	C	-0.1173	0.02511	3.07e-06	3653	Natural Killer T Absolute Count	21.8105	0.00593836
rs10972866	G	A	-0.1122	0.02476	6.02e-06	3653	Natural Killer T Absolute Count	20.5233	0.00558985
rs112708092	C	T	-0.1659	0.03734	9.12e-06	3653	Natural Killer T Absolute Count	19.7291	0.0053747
rs113127552	T	C	-0.2014	0.04411	5.16e-06	3653	Natural Killer T Absolute Count	20.8356	0.00567445
rs114574090	C	T	0.5615	0.1194	2.66e-06	3653	Natural Killer T Absolute Count	22.1031	0.00601755
rs115536607	C	T	0.264	0.0552	1.79e-06	3653	Natural Killer T Absolute Count	22.8608	0.00622256
rs117521333	G	T	-0.4226	0.0926	5.18e-06	3653	Natural Killer T Absolute Count	20.8161	0.00566915
rs12792298	C	T	-0.3521	0.06692	1.51e-07	3653	Natural Killer T Absolute Count	27.6683	0.00752128
rs12817873	G	A	0.117	0.02638	9.44e-06	3653	Natural Killer T Absolute Count	19.66	0.00535599
rs12895031	C	T	-0.207	0.04067	3.8e-07	3653	Natural Killer T Absolute Count	25.8913	0.00704164
rs139249541	A	G	0.4624	0.07284	2.44e-10	3653	Natural Killer T Absolute Count	40.2771	0.0109114
rs145191094	T	G	0.231	0.05116	6.52e-06	3653	Natural Killer T Absolute Count	20.3763	0.00555004
rs16868916	A	C	0.8601	0.1833	2.81e-06	3653	Natural Killer T Absolute Count	22.0057	0.0059912
rs2781107	T	C	-0.1119	0.0249	7.16e-06	3653	Natural Killer T Absolute Count	20.1848	0.00549816
rs35164053	G	A	-0.5201	0.1061	9.85e-07	3653	Natural Killer T Absolute Count	24.0162	0.006535
rs353293	C	T	-0.1156	0.02498	3.8e-06	3653	Natural Killer T Absolute Count	21.4039	0.00582831
rs640339	C	T	0.1184	0.02522	2.78e-06	3653	Natural Killer T Absolute Count	22.028	0.00599724
rs7232006	C	T	0.3817	0.0853	7.88e-06	3653	Natural Killer T Absolute Count	20.0128	0.00545158
rs72717679	T	G	0.6919	0.1488	3.41e-06	3653	Natural Killer T Absolute Count	21.6094	0.00588394
rs72960531	C	T	-0.4897	0.1087	6.85e-06	3653	Natural Killer T Absolute Count	20.2845	0.00552516
rs73109444	C	T	0.3815	0.0753	4.24e-07	3653	Natural Killer T Absolute Count	25.6544	0.00697764
rs75494211	G	A	0.4706	0.07011	2.22e-11	3653	Natural Killer T Absolute Count	45.0304	0.0121835
rs7819099	A	G	0.1387	0.02493	2.84e-08	3653	Natural Killer T Absolute Count	30.9365	0.00840222
rs78268116	C	T	-0.4086	0.03904	2.79e-25	3653	Natural Killer T Absolute Count	109.481	0.0291136
rs79218831	G	A	0.2605	0.05866	9.2e-06	3653	Natural Killer T Absolute Count	19.7103	0.00536962
rs79649529	G	A	-0.346	0.07498	4.06e-06	3653	Natural Killer T Absolute Count	21.2825	0.00579545
rs8104714	A	C	0.1274	0.0276	4.02e-06	3653	Natural Killer T Absolute Count	21.2953	0.0057989
rs9916629	T	C	0.1457	0.02472	4.13e-09	3653	Natural Killer T Absolute Count	34.7204	0.00942024
rs9983338	C	T	-0.4558	0.09222	8.05e-07	3653	Natural Killer T Absolute Count	24.4152	0.00664285
rs10750486	G	A	0.1233	0.0268	4.36e-06	3669	Natural Killer T %T cell	21.1553	0.00573602
rs10765907	T	C	-0.1174	0.02515	3.15e-06	3669	Natural Killer T %T cell	21.7783	0.00590393
rs112565020	C	T	-0.3059	0.06741	5.87e-06	3669	Natural Killer T %T cell	20.5813	0.00558126
rs115536607	C	T	0.3253	0.05512	3.91e-09	3669	Natural Killer T %T cell	34.8107	0.0094037
rs117147408	A	G	0.6063	0.07722	5.37e-15	3669	Natural Killer T %T cell	61.6139	0.0165246
rs12792298	C	T	-0.3574	0.0667	8.94e-08	3669	Natural Killer T %T cell	28.696	0.00776469
rs138112111	C	T	0.2725	0.06029	6.38e-06	3669	Natural Killer T %T cell	20.4176	0.00553711
rs149977848	G	A	0.4435	0.09924	8.11e-06	3669	Natural Killer T %T cell	19.9608	0.00541388
rs17158356	G	A	0.1595	0.03456	4.05e-06	3669	Natural Killer T %T cell	21.2881	0.00577181
rs186023757	C	T	-0.5038	0.1066	2.37e-06	3669	Natural Killer T %T cell	22.3236	0.00605088
rs2286306	A	G	-0.1333	0.02921	5.18e-06	3669	Natural Killer T %T cell	20.8142	0.00564406
rs2886726	A	G	-0.143	0.03067	3.23e-06	3669	Natural Killer T %T cell	21.7274	0.00589022
rs3012770	G	A	-0.119	0.02511	2.22e-06	3669	Natural Killer T %T cell	22.4473	0.00608418
rs4918328	G	A	0.156	0.03467	7.06e-06	3669	Natural Killer T %T cell	20.2351	0.00548787
rs6141832	A	G	0.5042	0.1127	7.97e-06	3669	Natural Killer T %T cell	20.0042	0.0054256
rs7225505	A	G	-0.1202	0.02583	3.4e-06	3669	Natural Killer T %T cell	21.6433	0.00586755
rs72717679	T	G	0.6822	0.1481	4.23e-06	3669	Natural Killer T %T cell	21.2069	0.00574991
rs73109444	C	T	0.3393	0.07539	6.97e-06	3669	Natural Killer T %T cell	20.2443	0.00549037
rs74426495	T	C	-1.449	0.3215	6.76e-06	3669	Natural Killer T %T cell	20.302	0.00550591
rs75659919	C	T	0.14	0.0296	2.34e-06	3669	Natural Killer T %T cell	22.3581	0.00606017
rs77738700	G	A	-0.435	0.03955	1.04e-27	3669	Natural Killer T %T cell	120.906	0.031919
rs77846504	G	A	-0.2072	0.04499	4.25e-06	3669	Natural Killer T %T cell	21.1988	0.00574773
rs7819099	A	G	0.148	0.02495	3.25e-09	3669	Natural Killer T %T cell	35.1678	0.00949925
rs79251210	G	A	0.4184	0.06614	2.83e-10	3669	Natural Killer T %T cell	39.9961	0.0107894
rs79649529	G	A	-0.3311	0.07471	9.6e-06	3669	Natural Killer T %T cell	19.6302	0.00532469
rs906930	G	T	-0.1885	0.03921	1.59e-06	3669	Natural Killer T %T cell	23.0989	0.00625971
rs9912354	C	T	0.121	0.02494	1.27e-06	3669	Natural Killer T %T cell	23.5256	0.0063746
rs9983338	C	T	-0.4349	0.09157	2.12e-06	3669	Natural Killer T %T cell	22.5442	0.0061103
rs112622820	G	A	-0.683	0.1497	5.26e-06	3405	Activated & secreting CD4 regulatory T cell Absolute Count	20.8038	0.00607622
rs113435341	A	G	-2.018	0.2282	1.47e-18	3405	Activated & secreting CD4 regulatory T cell Absolute Count	78.1548	0.0224508
rs115307639	T	G	-3.269	0.7195	5.74e-06	3405	Activated & secreting CD4 regulatory T cell Absolute Count	20.6307	0.00602596
rs11579717	G	A	-1.179	0.1933	1.18e-09	3405	Activated & secreting CD4 regulatory T cell Absolute Count	37.1799	0.0108076
rs1268153	G	A	0.8482	0.1738	1.11e-06	3405	Activated & secreting CD4 regulatory T cell Absolute Count	23.8036	0.00694629
rs138915779	C	A	-1.518	0.2369	1.67e-10	3405	Activated & secreting CD4 regulatory T cell Absolute Count	41.0354	0.0119149
rs138960714	A	C	-2.389	0.5191	4.36e-06	3405	Activated & secreting CD4 regulatory T cell Absolute Count	21.1678	0.00618187
rs145600407	C	T	-0.5371	0.1044	2.85e-07	3405	Activated & secreting CD4 regulatory T cell Absolute Count	26.4517	0.00771311
rs147638541	A	G	-1.375	0.2938	2.95e-06	3405	Activated & secreting CD4 regulatory T cell Absolute Count	21.89	0.00639146
rs149951966	T	C	0.2078	0.04392	2.33e-06	3405	Activated & secreting CD4 regulatory T cell Absolute Count	22.3723	0.00653136
rs153054	A	G	1.397	0.3131	8.39e-06	3405	Activated & secreting CD4 regulatory T cell Absolute Count	19.8963	0.0058127
rs17717645	T	C	0.3923	0.08188	1.73e-06	3405	Activated & secreting CD4 regulatory T cell Absolute Count	22.9417	0.00669647
rs56397630	T	C	-2.992	0.6758	9.87e-06	3405	Activated & secreting CD4 regulatory T cell Absolute Count	19.5899	0.0057237
rs61839660	C	T	0.3316	0.05733	7.93e-09	3405	Activated & secreting CD4 regulatory T cell Absolute Count	33.4357	0.00972975
rs7162344	G	A	-0.1207	0.02577	2.91e-06	3405	Activated & secreting CD4 regulatory T cell Absolute Count	21.9245	0.00640147
rs72833913	C	A	0.1855	0.04169	8.83e-06	3405	Activated & secreting CD4 regulatory T cell Absolute Count	19.7865	0.00578081
rs75596315	C	T	0.2653	0.05762	4.28e-06	3405	Activated & secreting CD4 regulatory T cell Absolute Count	21.1872	0.0061875
rs76202906	C	A	-0.3574	0.07469	1.78e-06	3405	Activated & secreting CD4 regulatory T cell Absolute Count	22.8838	0.00667969
rs10750486	G	A	0.1221	0.02696	6.14e-06	3669	Natural Killer T %lymphocyte	20.5	0.00555933
rs10765907	T	C	-0.1215	0.0253	1.63e-06	3669	Natural Killer T %lymphocyte	23.0502	0.00624658
rs115536607	C	T	0.3109	0.05547	2.25e-08	3669	Natural Killer T %lymphocyte	31.397	0.00848936
rs117147408	A	G	0.5685	0.07776	3.23e-13	3669	Natural Killer T %lymphocyte	53.421	0.0143588
rs12792298	C	T	-0.3438	0.06711	3.17e-07	3669	Natural Killer T %lymphocyte	26.2301	0.00710222
rs149977848	G	A	0.452	0.09982	6.13e-06	3669	Natural Killer T %lymphocyte	20.493	0.00555743
rs17158356	G	A	0.1541	0.03477	9.59e-06	3669	Natural Killer T %lymphocyte	19.6318	0.00532512
rs186023757	C	T	-0.4942	0.1072	4.19e-06	3669	Natural Killer T %lymphocyte	21.2412	0.00575917
rs2286306	A	G	-0.1331	0.02938	6.15e-06	3669	Natural Killer T %lymphocyte	20.5124	0.00556266
rs2781107	T	C	-0.1142	0.02505	5.25e-06	3669	Natural Killer T %lymphocyte	20.7721	0.00563269
rs2886726	A	G	-0.1397	0.03085	6.14e-06	3669	Natural Killer T %lymphocyte	20.4949	0.00555795
rs3012770	G	A	-0.1188	0.02526	2.63e-06	3669	Natural Killer T %lymphocyte	22.107	0.0059925
rs35203503	T	C	0.1187	0.02658	8.21e-06	3669	Natural Killer T %lymphocyte	19.9322	0.00540617
rs4918328	G	A	0.1569	0.03487	7.07e-06	3669	Natural Killer T %lymphocyte	20.2351	0.00548788
rs7225505	A	G	-0.1158	0.02599	8.53e-06	3669	Natural Killer T %lymphocyte	19.8412	0.00538162
rs7254941	C	T	-0.2344	0.05243	8.03e-06	3669	Natural Killer T %lymphocyte	19.9765	0.00541812
rs72717679	T	G	0.6865	0.149	4.19e-06	3669	Natural Killer T %lymphocyte	21.2164	0.00575248
rs73109444	C	T	0.3614	0.0758	1.93e-06	3669	Natural Killer T %lymphocyte	22.7196	0.00615755
rs74426495	T	C	-1.438	0.3234	8.97e-06	3669	Natural Killer T %lymphocyte	19.7606	0.00535989
rs75659919	C	T	0.1388	0.02978	3.24e-06	3669	Natural Killer T %lymphocyte	21.7116	0.00588597
rs77738700	G	A	-0.4214	0.03983	8.64e-26	3669	Natural Killer T %lymphocyte	111.875	0.0296053
rs77846504	G	A	-0.2097	0.04525	3.72e-06	3669	Natural Killer T %lymphocyte	21.4646	0.00581939
rs7819099	A	G	0.1488	0.0251	3.34e-09	3669	Natural Killer T %lymphocyte	35.1254	0.00948791
rs79251210	G	A	0.4014	0.06656	1.79e-09	3669	Natural Killer T %lymphocyte	36.3489	0.00981514
rs906930	G	T	-0.1858	0.03945	2.56e-06	3669	Natural Killer T %lymphocyte	22.1697	0.00600941
rs9912354	C	T	0.1443	0.02505	9.1e-09	3669	Natural Killer T %lymphocyte	33.165	0.00896312
rs9983338	C	T	-0.4399	0.09211	1.86e-06	3669	Natural Killer T %lymphocyte	22.7959	0.0061781
rs10787670	T	C	-0.1963	0.04335	6.14e-06	3579	HLA DR+ CD4+ T cell Absolute Count	20.4937	0.00569665
rs10845930	T	C	0.1584	0.03494	6.03e-06	3579	HLA DR+ CD4+ T cell Absolute Count	20.541	0.00570974
rs11251832	G	A	0.1894	0.04192	6.44e-06	3579	HLA DR+ CD4+ T cell Absolute Count	20.4021	0.00567134
rs117110835	G	A	-0.783	0.1764	9.29e-06	3579	HLA DR+ CD4+ T cell Absolute Count	19.6917	0.00547495
rs1322067	A	G	-0.1511	0.02575	4.75e-09	3579	HLA DR+ CD4+ T cell Absolute Count	34.4137	0.00952916
rs142283210	T	G	-2.588	0.5703	5.86e-06	3579	HLA DR+ CD4+ T cell Absolute Count	20.5816	0.00572095
rs17198888	A	G	-0.2281	0.04783	1.93e-06	3579	HLA DR+ CD4+ T cell Absolute Count	22.7304	0.00631447
rs17824379	A	G	-0.9842	0.2221	9.64e-06	3579	HLA DR+ CD4+ T cell Absolute Count	19.6258	0.00545672
rs2064600	G	A	-0.3548	0.07367	1.53e-06	3579	HLA DR+ CD4+ T cell Absolute Count	23.1816	0.006439
rs3087456	G	A	-0.2926	0.02777	1.4e-25	3579	HLA DR+ CD4+ T cell Absolute Count	110.957	0.0300863
rs3134968	A	G	0.3737	0.07884	2.23e-06	3579	HLA DR+ CD4+ T cell Absolute Count	22.4549	0.0062384
rs55849757	C	T	-0.1129	0.02435	3.69e-06	3579	HLA DR+ CD4+ T cell Absolute Count	21.4856	0.00597073
rs609755	A	G	1.274	0.2872	9.48e-06	3579	HLA DR+ CD4+ T cell Absolute Count	19.6665	0.00546798
rs62166973	G	A	-0.4445	0.09861	6.76e-06	3579	HLA DR+ CD4+ T cell Absolute Count	20.3076	0.00564523
rs62417423	A	G	-0.1396	0.03071	5.67e-06	3579	HLA DR+ CD4+ T cell Absolute Count	20.6523	0.00574049
rs6767083	C	A	0.1335	0.02844	2.78e-06	3579	HLA DR+ CD4+ T cell Absolute Count	22.0222	0.00611894
rs6891593	G	A	0.3491	0.07676	5.62e-06	3579	HLA DR+ CD4+ T cell Absolute Count	20.6722	0.005746
rs7405251	T	G	-0.1151	0.02473	3.35e-06	3579	HLA DR+ CD4+ T cell Absolute Count	21.6501	0.00601617
rs78229126	C	A	0.1603	0.03437	3.23e-06	3579	HLA DR+ CD4+ T cell Absolute Count	21.7403	0.00604108
rs79769908	T	G	-0.1766	0.03991	9.98e-06	3579	HLA DR+ CD4+ T cell Absolute Count	19.5693	0.0054411
rs9613063	C	T	-0.1553	0.03005	2.5e-07	3579	HLA DR+ CD4+ T cell Absolute Count	26.6938	0.00740736
rs10052603	A	G	-0.1031	0.02216	3.39e-06	3595	HLA DR+ CD4+ T cell %T cell	21.634	0.00598511
rs11090233	G	A	-0.09863	0.02209	8.27e-06	3595	HLA DR+ CD4+ T cell %T cell	19.9244	0.00551475
rs116253486	T	C	-1.176	0.2655	9.64e-06	3595	HLA DR+ CD4+ T cell %T cell	19.6085	0.00542779
rs11641185	C	T	-0.2989	0.02511	4.52e-32	3595	HLA DR+ CD4+ T cell %T cell	141.617	0.0379202
rs117110835	G	A	-0.7092	0.1583	7.7e-06	3595	HLA DR+ CD4+ T cell %T cell	20.0601	0.00555212
rs117816082	A	G	0.5775	0.1302	9.41e-06	3595	HLA DR+ CD4+ T cell %T cell	19.6626	0.00544268
rs117868023	G	A	-0.4255	0.09406	6.28e-06	3595	HLA DR+ CD4+ T cell %T cell	20.4526	0.00566011
rs140410174	C	T	-0.209	0.04598	5.69e-06	3595	HLA DR+ CD4+ T cell %T cell	20.6497	0.00571435
rs146016042	G	A	-0.5232	0.1155	6.11e-06	3595	HLA DR+ CD4+ T cell %T cell	20.5083	0.00567546
rs149004280	C	T	-0.5593	0.119	2.68e-06	3595	HLA DR+ CD4+ T cell %T cell	22.0777	0.00610712
rs150440365	A	G	-0.5324	0.117	5.51e-06	3595	HLA DR+ CD4+ T cell %T cell	20.6949	0.00572679
rs3104415	A	C	0.1268	0.02613	1.28e-06	3595	HLA DR+ CD4+ T cell %T cell	23.5352	0.00650767
rs4867947	C	A	0.1895	0.04263	9.02e-06	3595	HLA DR+ CD4+ T cell %T cell	19.749	0.00546649
rs4906573	T	C	0.1137	0.02563	9.34e-06	3595	HLA DR+ CD4+ T cell %T cell	19.669	0.00544445
rs6071096	T	C	-0.1051	0.02228	2.49e-06	3595	HLA DR+ CD4+ T cell %T cell	22.2399	0.00615172
rs646262	A	G	0.1107	0.02442	6.05e-06	3595	HLA DR+ CD4+ T cell %T cell	20.5382	0.00568368
rs7032773	C	T	-0.1199	0.02281	1.55e-07	3595	HLA DR+ CD4+ T cell %T cell	27.6151	0.00762718
rs7202106	C	T	0.1188	0.02634	6.64e-06	3595	HLA DR+ CD4+ T cell %T cell	20.331	0.00562668
rs79563199	C	A	-0.1399	0.03045	4.52e-06	3595	HLA DR+ CD4+ T cell %T cell	21.0969	0.0058374
rs7972178	G	T	0.1108	0.02265	1.05e-06	3595	HLA DR+ CD4+ T cell %T cell	23.9167	0.00661246
rs80226392	A	G	-0.1415	0.03118	5.86e-06	3595	HLA DR+ CD4+ T cell %T cell	20.5835	0.00569614
rs8055544	G	T	0.1124	0.02485	6.26e-06	3595	HLA DR+ CD4+ T cell %T cell	20.4474	0.0056587
rs11090233	G	A	-0.11	0.02271	1.33e-06	3595	HLA DR+ CD4+ T cell %lymphocyte	23.4482	0.00648376
rs112418658	T	C	-0.2348	0.05264	8.45e-06	3595	HLA DR+ CD4+ T cell %lymphocyte	19.8849	0.00550388
rs116253486	T	C	-1.26	0.273	4.06e-06	3595	HLA DR+ CD4+ T cell %lymphocyte	21.2899	0.00589049
rs117868023	G	A	-0.4395	0.09676	5.75e-06	3595	HLA DR+ CD4+ T cell %lymphocyte	20.6198	0.00570613
rs12610775	A	G	-0.1073	0.02271	2.4e-06	3595	HLA DR+ CD4+ T cell %lymphocyte	22.3112	0.00617132
rs12716076	A	G	-0.1017	0.0228	8.4e-06	3595	HLA DR+ CD4+ T cell %lymphocyte	19.8852	0.00550397
rs140410174	C	T	-0.2205	0.04729	3.24e-06	3595	HLA DR+ CD4+ T cell %lymphocyte	21.7289	0.0060112
rs149004280	C	T	-0.5613	0.1224	4.67e-06	3595	HLA DR+ CD4+ T cell %lymphocyte	21.0177	0.00581561
rs150440365	A	G	-0.549	0.1203	5.24e-06	3595	HLA DR+ CD4+ T cell %lymphocyte	20.8148	0.00575978
rs1608073	C	T	-0.103	0.02261	5.4e-06	3595	HLA DR+ CD4+ T cell %lymphocyte	20.7411	0.00573951
rs3087456	G	A	-0.3114	0.02551	1.34e-33	3595	HLA DR+ CD4+ T cell %lymphocyte	148.927	0.0397997
rs3104414	G	A	0.1367	0.02822	1.33e-06	3595	HLA DR+ CD4+ T cell %lymphocyte	23.4521	0.00648483
rs4867947	C	A	0.2016	0.04384	4.41e-06	3595	HLA DR+ CD4+ T cell %lymphocyte	21.1348	0.00584782
rs4906573	T	C	0.1229	0.02636	3.26e-06	3595	HLA DR+ CD4+ T cell %lymphocyte	21.7256	0.0060103
rs539211	T	C	-0.2029	0.04543	8.2e-06	3595	HLA DR+ CD4+ T cell %lymphocyte	19.936	0.00551794
rs6071096	T	C	-0.1019	0.02292	8.96e-06	3595	HLA DR+ CD4+ T cell %lymphocyte	19.755	0.00546813
rs7032773	C	T	-0.1334	0.02345	1.39e-08	3595	HLA DR+ CD4+ T cell %lymphocyte	32.3433	0.00892144
rs7202106	C	T	0.1276	0.02709	2.58e-06	3595	HLA DR+ CD4+ T cell %lymphocyte	22.1739	0.00613356
rs7972178	G	T	0.1129	0.0233	1.3e-06	3595	HLA DR+ CD4+ T cell %lymphocyte	23.4657	0.00648859
rs10152591	A	C	-0.2253	0.04968	5.96e-06	3579	HLA DR+ CD8+ T cell Absolute Count	20.555	0.00571359
rs111481219	C	T	-0.238	0.04578	2.11e-07	3579	HLA DR+ CD8+ T cell Absolute Count	27.0122	0.00749503
rs11153123	A	G	-0.1305	0.02924	8.32e-06	3579	HLA DR+ CD8+ T cell Absolute Count	19.9078	0.0055347
rs11197647	G	T	0.2373	0.04575	2.27e-07	3579	HLA DR+ CD8+ T cell Absolute Count	26.8887	0.00746104
rs117517764	A	G	0.1906	0.04234	6.98e-06	3579	HLA DR+ CD8+ T cell Absolute Count	20.2536	0.00563028
rs12029484	A	G	-0.2266	0.0462	9.79e-07	3579	HLA DR+ CD8+ T cell Absolute Count	24.0432	0.00667674
rs138213638	T	C	1.495	0.3314	6.69e-06	3579	HLA DR+ CD8+ T cell Absolute Count	20.3392	0.00565397
rs138678763	T	C	-0.8815	0.1709	2.65e-07	3579	HLA DR+ CD8+ T cell Absolute Count	26.59	0.00737874
rs17286630	A	G	-0.3262	0.06773	1.53e-06	3579	HLA DR+ CD8+ T cell Absolute Count	23.1826	0.0064393
rs2181036	T	C	-0.1446	0.02608	3.17e-08	3579	HLA DR+ CD8+ T cell Absolute Count	30.7241	0.00851619
rs2516465	G	T	0.1607	0.03146	3.43e-07	3579	HLA DR+ CD8+ T cell Absolute Count	26.0778	0.00723766
rs2808067	T	C	0.1243	0.0261	2.01e-06	3579	HLA DR+ CD8+ T cell Absolute Count	22.6683	0.00629732
rs3087456	G	A	-0.4286	0.0278	5.57e-52	3579	HLA DR+ CD8+ T cell Absolute Count	237.559	0.062277
rs35669214	T	C	-0.1242	0.02793	9.05e-06	3579	HLA DR+ CD8+ T cell Absolute Count	19.7633	0.00549473
rs506151	C	T	-0.4162	0.08787	2.26e-06	3579	HLA DR+ CD8+ T cell Absolute Count	22.4223	0.00622942
rs567794	G	A	-0.1197	0.02459	1.18e-06	3579	HLA DR+ CD8+ T cell Absolute Count	23.6826	0.00657724
rs57068864	G	A	0.196	0.0435	6.8e-06	3579	HLA DR+ CD8+ T cell Absolute Count	20.2904	0.00564047
rs59231583	G	T	0.1239	0.02769	7.93e-06	3579	HLA DR+ CD8+ T cell Absolute Count	20.0103	0.00556304
rs61500216	T	C	0.2173	0.04709	4.05e-06	3579	HLA DR+ CD8+ T cell Absolute Count	21.2823	0.00591458
rs6686155	C	A	0.2308	0.04753	1.25e-06	3579	HLA DR+ CD8+ T cell Absolute Count	23.5664	0.00654519
rs72779785	A	G	-0.2122	0.03296	1.36e-10	3579	HLA DR+ CD8+ T cell Absolute Count	41.4261	0.0114486
rs73365443	G	A	0.1456	0.02977	1.05e-06	3579	HLA DR+ CD8+ T cell Absolute Count	23.9068	0.00663912
rs74743779	C	T	-0.2114	0.04705	7.27e-06	3579	HLA DR+ CD8+ T cell Absolute Count	20.1766	0.00560901
rs75495211	G	T	-0.2997	0.06655	6.88e-06	3579	HLA DR+ CD8+ T cell Absolute Count	20.2691	0.00563458
rs75799568	C	T	1.176	0.2558	4.39e-06	3579	HLA DR+ CD8+ T cell Absolute Count	21.1237	0.00587077
rs75913581	G	A	0.1133	0.02474	4.82e-06	3579	HLA DR+ CD8+ T cell Absolute Count	20.9613	0.00582588
rs76443179	G	A	1.513	0.3363	7.06e-06	3579	HLA DR+ CD8+ T cell Absolute Count	20.2293	0.00562358
rs76997602	A	G	-0.4225	0.09112	3.67e-06	3579	HLA DR+ CD8+ T cell Absolute Count	21.4874	0.00597122
rs78581629	G	A	-0.1869	0.0408	4.78e-06	3579	HLA DR+ CD8+ T cell Absolute Count	20.9728	0.00582905
rs78648104	T	C	-0.1496	0.03361	8.81e-06	3579	HLA DR+ CD8+ T cell Absolute Count	19.8008	0.00550512
rs78744340	G	A	-0.4444	0.09699	4.76e-06	3579	HLA DR+ CD8+ T cell Absolute Count	20.9822	0.00583166
rs79684162	C	T	0.4692	0.09735	1.5e-06	3579	HLA DR+ CD8+ T cell Absolute Count	23.2167	0.00644871
rs112455120	C	T	0.3608	0.06884	1.69e-07	3595	HLA DR+ CD8+ T cell %T cell	27.4543	0.0075831
rs112935806	G	A	0.3437	0.07538	5.31e-06	3595	HLA DR+ CD8+ T cell %T cell	20.7781	0.00574968
rs117517764	A	G	0.1844	0.04074	6.19e-06	3595	HLA DR+ CD8+ T cell %T cell	20.4757	0.00566647
rs12029484	A	G	-0.2178	0.04445	1e-06	3595	HLA DR+ CD8+ T cell %T cell	23.9955	0.00663411
rs138213638	T	C	1.501	0.3194	2.68e-06	3595	HLA DR+ CD8+ T cell %T cell	22.0724	0.00610566
rs138469017	C	T	0.3854	0.07809	8.4e-07	3595	HLA DR+ CD8+ T cell %T cell	24.3439	0.00672978
rs138678763	T	C	-0.8053	0.1649	1.08e-06	3595	HLA DR+ CD8+ T cell %T cell	23.8359	0.00659028
rs1407309	G	A	-0.1339	0.02508	9.86e-08	3595	HLA DR+ CD8+ T cell %T cell	28.4882	0.00786642
rs3087456	G	A	-0.4526	0.02659	1.47e-62	3595	HLA DR+ CD8+ T cell %T cell	289.568	0.0745816
rs4920093	A	G	0.2643	0.05571	2.18e-06	3595	HLA DR+ CD8+ T cell %T cell	22.495	0.00622184
rs506151	C	T	-0.4018	0.08469	2.18e-06	3595	HLA DR+ CD8+ T cell %T cell	22.4964	0.00622223
rs542160	C	T	-0.1295	0.02364	4.62e-08	3595	HLA DR+ CD8+ T cell %T cell	29.9918	0.00827819
rs6020784	A	G	0.1427	0.03104	4.45e-06	3595	HLA DR+ CD8+ T cell %T cell	21.1234	0.00584467
rs6975360	A	G	-0.1252	0.02738	4.97e-06	3595	HLA DR+ CD8+ T cell %T cell	20.8978	0.00578261
rs7027771	T	C	0.1171	0.0244	1.64e-06	3595	HLA DR+ CD8+ T cell %T cell	23.0193	0.00636593
rs7195518	A	G	0.5431	0.1192	5.37e-06	3595	HLA DR+ CD8+ T cell %T cell	20.7475	0.00574127
rs72779785	A	G	-0.1852	0.03176	5.96e-09	3595	HLA DR+ CD8+ T cell %T cell	33.9844	0.00936987
rs72998075	C	T	-0.1324	0.0294	6.9e-06	3595	HLA DR+ CD8+ T cell %T cell	20.2693	0.0056097
rs73365443	G	A	0.1329	0.02864	3.59e-06	3595	HLA DR+ CD8+ T cell %T cell	21.521	0.00595404
rs76443179	G	A	1.66	0.3239	3.13e-07	3595	HLA DR+ CD8+ T cell %T cell	26.2514	0.00725327
rs78456529	C	T	-0.156	0.03363	3.61e-06	3595	HLA DR+ CD8+ T cell %T cell	21.5057	0.00594983
rs79132531	A	G	0.2117	0.04536	3.16e-06	3595	HLA DR+ CD8+ T cell %T cell	21.7698	0.00602245
rs112455120	C	T	0.3662	0.06983	1.66e-07	3595	HLA DR+ CD8+ T cell %lymphocyte	27.486	0.00759179
rs113162001	C	T	0.1702	0.03797	7.56e-06	3595	HLA DR+ CD8+ T cell %lymphocyte	20.0815	0.005558
rs117517764	A	G	0.1841	0.04133	8.72e-06	3595	HLA DR+ CD8+ T cell %lymphocyte	19.8306	0.00548893
rs12029484	A	G	-0.2164	0.04509	1.66e-06	3595	HLA DR+ CD8+ T cell %lymphocyte	23.0204	0.00636622
rs138469017	C	T	0.3948	0.07921	6.51e-07	3595	HLA DR+ CD8+ T cell %lymphocyte	24.8286	0.00686285
rs138678763	T	C	-0.8001	0.1673	1.79e-06	3595	HLA DR+ CD8+ T cell %lymphocyte	22.8589	0.00632184
rs1407309	G	A	-0.1372	0.02544	7.38e-08	3595	HLA DR+ CD8+ T cell %lymphocyte	29.0691	0.00802556
rs1431485	T	C	-0.2005	0.04329	3.74e-06	3595	HLA DR+ CD8+ T cell %lymphocyte	21.4394	0.00593159
rs2146255	A	C	-0.1165	0.025	3.3e-06	3595	HLA DR+ CD8+ T cell %lymphocyte	21.7035	0.00600423
rs3087456	G	A	-0.4525	0.027	9.23e-61	3595	HLA DR+ CD8+ T cell %lymphocyte	280.717	0.072467
rs4920093	A	G	0.259	0.05652	4.75e-06	3595	HLA DR+ CD8+ T cell %lymphocyte	20.9872	0.0058072
rs506151	C	T	-0.3949	0.08593	4.47e-06	3595	HLA DR+ CD8+ T cell %lymphocyte	21.1078	0.00584039
rs542160	C	T	-0.1259	0.02399	1.61e-07	3595	HLA DR+ CD8+ T cell %lymphocyte	27.5264	0.00760287
rs6020784	A	G	0.1464	0.03148	3.42e-06	3595	HLA DR+ CD8+ T cell %lymphocyte	21.6158	0.00598011
rs6975360	A	G	-0.1264	0.02777	5.49e-06	3595	HLA DR+ CD8+ T cell %lymphocyte	20.7062	0.00572991
rs7195518	A	G	0.5438	0.1209	7.08e-06	3595	HLA DR+ CD8+ T cell %lymphocyte	20.2201	0.00559615
rs72768367	G	T	0.727	0.1635	8.97e-06	3595	HLA DR+ CD8+ T cell %lymphocyte	19.7602	0.00546956
rs72779785	A	G	-0.1929	0.03221	2.31e-09	3595	HLA DR+ CD8+ T cell %lymphocyte	35.8461	0.00987809
rs73030989	C	T	1.695	0.3593	2.47e-06	3595	HLA DR+ CD8+ T cell %lymphocyte	22.2425	0.00615242
rs73365443	G	A	0.1332	0.02906	4.76e-06	3595	HLA DR+ CD8+ T cell %lymphocyte	20.9979	0.00581015
rs76997602	A	G	-0.3958	0.08847	7.93e-06	3595	HLA DR+ CD8+ T cell %lymphocyte	20.004	0.00553668
rs78456529	C	T	-0.1636	0.03411	1.68e-06	3595	HLA DR+ CD8+ T cell %lymphocyte	22.9912	0.0063582
rs78581629	G	A	-0.1864	0.03982	2.96e-06	3595	HLA DR+ CD8+ T cell %lymphocyte	21.9002	0.00605831
rs79132531	A	G	0.2085	0.04602	6.08e-06	3595	HLA DR+ CD8+ T cell %lymphocyte	20.5153	0.00567737
rs111237501	T	C	1.052	0.2261	3.35e-06	3656	IgD- CD24- B cell Absolute Count	21.6368	0.00588654
rs112898282	T	C	0.4601	0.1017	6.28e-06	3656	IgD- CD24- B cell Absolute Count	20.4562	0.00556714
rs114114265	G	A	0.2343	0.05149	5.51e-06	3656	IgD- CD24- B cell Absolute Count	20.6948	0.0056317
rs145638783	G	A	-0.9851	0.2144	4.47e-06	3656	IgD- CD24- B cell Absolute Count	21.0996	0.00574122
rs17044633	A	G	0.3458	0.07605	5.62e-06	3656	IgD- CD24- B cell Absolute Count	20.664	0.00562336
rs191543445	A	G	0.3337	0.07236	4.14e-06	3656	IgD- CD24- B cell Absolute Count	21.2558	0.00578349
rs421516	C	A	-0.2921	0.06361	4.54e-06	3656	IgD- CD24- B cell Absolute Count	21.0753	0.00573467
rs451367	T	C	-0.146	0.0296	8.52e-07	3656	IgD- CD24- B cell Absolute Count	24.3156	0.00661052
rs4697616	G	A	0.1246	0.02682	3.53e-06	3656	IgD- CD24- B cell Absolute Count	21.5715	0.00586889
rs496760	G	A	0.1331	0.02656	5.69e-07	3656	IgD- CD24- B cell Absolute Count	25.0993	0.00682214
rs74356874	G	A	0.6821	0.1488	4.74e-06	3656	IgD- CD24- B cell Absolute Count	21.0016	0.00571472
rs75453701	A	G	0.2658	0.05994	9.47e-06	3656	IgD- CD24- B cell Absolute Count	19.6535	0.00534984
rs7615875	T	C	0.1425	0.03201	8.85e-06	3656	IgD- CD24- B cell Absolute Count	19.8071	0.00539144
rs76225955	T	C	-0.1924	0.0432	8.66e-06	3656	IgD- CD24- B cell Absolute Count	19.8246	0.00539618
rs76499400	G	T	0.2069	0.04589	6.77e-06	3656	IgD- CD24- B cell Absolute Count	20.3164	0.00552931
rs7982713	A	G	-0.1482	0.03033	1.07e-06	3656	IgD- CD24- B cell Absolute Count	23.8624	0.00648811
rs1008425	A	G	0.1228	0.0275	8.2e-06	3652	CD8+ Natural Killer T Absolute Count	19.9294	0.00543045
rs1077381	C	T	0.1155	0.02547	6.03e-06	3652	CD8+ Natural Killer T Absolute Count	20.5527	0.00559934
rs11658693	A	G	-0.2038	0.03962	2.84e-07	3652	CD8+ Natural Killer T Absolute Count	26.4449	0.00719306
rs117122100	C	T	-0.4686	0.1039	6.63e-06	3652	CD8+ Natural Killer T Absolute Count	20.3299	0.00553899
rs12422853	G	A	0.1113	0.02489	8.03e-06	3652	CD8+ Natural Killer T Absolute Count	19.9849	0.00544551
rs12792298	C	T	-0.3155	0.06667	2.3e-06	3652	CD8+ Natural Killer T Absolute Count	22.3821	0.0060947
rs12940345	C	T	0.1138	0.02473	4.33e-06	3652	CD8+ Natural Killer T Absolute Count	21.164	0.00576494
rs1325907	G	A	-0.1298	0.02573	4.73e-07	3652	CD8+ Natural Killer T Absolute Count	25.435	0.00692027
rs144156455	T	C	0.3176	0.06734	2.49e-06	3652	CD8+ Natural Killer T Absolute Count	22.2319	0.00605406
rs17448682	C	T	0.142	0.0313	5.9e-06	3652	CD8+ Natural Killer T Absolute Count	20.5707	0.00560424
rs2074023	C	T	-0.1237	0.02486	6.76e-07	3652	CD8+ Natural Killer T Absolute Count	24.7457	0.00673398
rs34575510	C	T	0.2742	0.05762	2.03e-06	3652	CD8+ Natural Killer T Absolute Count	22.6334	0.00616273
rs4745010	A	G	0.1325	0.02737	1.35e-06	3652	CD8+ Natural Killer T Absolute Count	23.4231	0.00637637
rs593435	C	T	0.1122	0.02497	7.25e-06	3652	CD8+ Natural Killer T Absolute Count	20.1795	0.00549824
rs60553229	G	A	-1.538	0.32	1.6e-06	3652	CD8+ Natural Killer T Absolute Count	23.0874	0.00628555
rs7003580	C	T	0.1169	0.02495	2.89e-06	3652	CD8+ Natural Killer T Absolute Count	21.9407	0.00597523
rs73109444	C	T	0.34	0.075	6.01e-06	3652	CD8+ Natural Killer T Absolute Count	20.5399	0.00559587
rs7756993	T	C	-0.1338	0.02858	2.96e-06	3652	CD8+ Natural Killer T Absolute Count	21.9053	0.00596566
rs78268116	C	T	-0.3964	0.0389	4.65e-24	3652	CD8+ Natural Killer T Absolute Count	103.784	0.0276478
rs9269109	T	C	0.1671	0.03018	3.31e-08	3652	CD8+ Natural Killer T Absolute Count	30.6391	0.00832441
rs10276441	G	A	0.1529	0.03242	2.49e-06	3668	CD8+ Natural Killer T %T cell	22.2306	0.00602746
rs115294653	G	A	-0.5427	0.1182	4.58e-06	3668	CD8+ Natural Killer T %T cell	21.0692	0.00571435
rs11544989	A	G	0.1198	0.02512	1.92e-06	3668	CD8+ Natural Killer T %T cell	22.732	0.00616255
rs11650003	A	G	-0.116	0.0252	4.32e-06	3668	CD8+ Natural Killer T %T cell	21.1777	0.0057436
rs11658954	A	G	-0.1133	0.02456	4.12e-06	3668	CD8+ Natural Killer T %T cell	21.2699	0.00576848
rs117122100	C	T	-0.4711	0.1021	4.08e-06	3668	CD8+ Natural Killer T %T cell	21.2783	0.00577075
rs12499194	C	T	0.1933	0.04349	9.06e-06	3668	CD8+ Natural Killer T %T cell	19.7446	0.00535701
rs12792298	C	T	-0.3117	0.0657	2.18e-06	3668	CD8+ Natural Killer T %T cell	22.496	0.00609897
rs144156455	T	C	0.3243	0.06611	9.69e-07	3668	CD8+ Natural Killer T %T cell	24.0504	0.00651764
rs145936741	A	G	-0.5116	0.113	6.2e-06	3668	CD8+ Natural Killer T %T cell	20.4865	0.00555718
rs161249	T	C	-0.2409	0.05153	3.06e-06	3668	CD8+ Natural Killer T %T cell	21.8432	0.00592303
rs17256404	A	C	0.1762	0.03906	6.67e-06	3668	CD8+ Natural Killer T %T cell	20.3381	0.00551716
rs2074023	C	T	-0.1212	0.02454	8.25e-07	3668	CD8+ Natural Killer T %T cell	24.3792	0.00660615
rs2395191	T	C	0.136	0.02973	4.94e-06	3668	CD8+ Natural Killer T %T cell	20.9147	0.00567268
rs34575510	C	T	0.2565	0.05684	6.62e-06	3668	CD8+ Natural Killer T %T cell	20.3531	0.00552119
rs34994982	A	G	-0.193	0.04168	3.79e-06	3668	CD8+ Natural Killer T %T cell	21.43	0.00581164
rs56297703	T	C	-0.1378	0.03086	8.26e-06	3668	CD8+ Natural Killer T %T cell	19.9283	0.00540658
rs568739	T	C	0.1093	0.02466	9.52e-06	3668	CD8+ Natural Killer T %T cell	19.6344	0.00532727
rs5769842	G	A	-0.2247	0.04949	5.78e-06	3668	CD8+ Natural Killer T %T cell	20.6032	0.00558866
rs60553229	G	A	-1.451	0.3163	4.62e-06	3668	CD8+ Natural Killer T %T cell	21.0329	0.00570457
rs61815774	C	T	-0.5656	0.1238	5.08e-06	3668	CD8+ Natural Killer T %T cell	20.8613	0.00565827
rs725683	C	T	-0.1196	0.02542	2.63e-06	3668	CD8+ Natural Killer T %T cell	22.1245	0.00599886
rs76161425	C	T	-0.406	0.03854	1.41e-25	3668	CD8+ Natural Killer T %T cell	110.915	0.0293667
rs10059100	A	G	0.1214	0.02435	6.51e-07	3437	Activated & secreting CD4 regulatory T cell %CD4 regulatory T cell	24.842	0.0071801
rs112455863	A	G	0.6921	0.1525	5.9e-06	3437	Activated & secreting CD4 regulatory T cell %CD4 regulatory T cell	20.5847	0.00595695
rs112637846	C	A	-2.712	0.5963	5.61e-06	3437	Activated & secreting CD4 regulatory T cell %CD4 regulatory T cell	20.6727	0.00598225
rs113000944	C	T	-0.2336	0.04699	6.94e-07	3437	Activated & secreting CD4 regulatory T cell %CD4 regulatory T cell	24.6991	0.0071391
rs113435341	A	G	-2.621	0.1957	6.33e-40	3437	Activated & secreting CD4 regulatory T cell %CD4 regulatory T cell	179.267	0.0495997
rs115644319	A	G	-0.3111	0.05944	1.76e-07	3437	Activated & secreting CD4 regulatory T cell %CD4 regulatory T cell	27.3772	0.00790706
rs115669925	G	A	4.109	0.9038	5.65e-06	3437	Activated & secreting CD4 regulatory T cell %CD4 regulatory T cell	20.6574	0.00597784
rs11579717	G	A	-1.821	0.1663	1.87e-27	3437	Activated & secreting CD4 regulatory T cell %CD4 regulatory T cell	119.835	0.0337103
rs115907036	C	T	-0.4234	0.09565	9.86e-06	3437	Activated & secreting CD4 regulatory T cell %CD4 regulatory T cell	19.583	0.0056687
rs116499452	G	A	-0.2835	0.04977	1.33e-08	3437	Activated & secreting CD4 regulatory T cell %CD4 regulatory T cell	32.4278	0.00935213
rs116850494	G	A	-0.4419	0.09434	2.92e-06	3437	Activated & secreting CD4 regulatory T cell %CD4 regulatory T cell	21.9282	0.00634327
rs11969660	C	T	-0.2112	0.04712	7.66e-06	3437	Activated & secreting CD4 regulatory T cell %CD4 regulatory T cell	20.0782	0.00581121
rs12722496	A	G	0.215	0.04755	6.33e-06	3437	Activated & secreting CD4 regulatory T cell %CD4 regulatory T cell	20.4326	0.00591317
rs138463974	A	G	-0.7442	0.1648	6.52e-06	3437	Activated & secreting CD4 regulatory T cell %CD4 regulatory T cell	20.3804	0.00589816
rs138915779	C	A	-1.784	0.2042	3.7e-18	3437	Activated & secreting CD4 regulatory T cell %CD4 regulatory T cell	76.2826	0.021725
rs138960714	A	C	-2.124	0.451	2.59e-06	3437	Activated & secreting CD4 regulatory T cell %CD4 regulatory T cell	22.1668	0.00641184
rs139681117	C	T	-0.2345	0.05158	5.65e-06	3437	Activated & secreting CD4 regulatory T cell %CD4 regulatory T cell	20.6571	0.00597778
rs145406940	G	A	1.967	0.4233	3.51e-06	3437	Activated & secreting CD4 regulatory T cell %CD4 regulatory T cell	21.5804	0.00624328
rs146899923	T	C	-0.7496	0.1241	1.68e-09	3437	Activated & secreting CD4 regulatory T cell %CD4 regulatory T cell	36.4639	0.0105039
rs150437123	G	A	-0.3701	0.06472	1.17e-08	3437	Activated & secreting CD4 regulatory T cell %CD4 regulatory T cell	32.682	0.00942473
rs150956189	T	C	-2.624	0.5683	4.02e-06	3437	Activated & secreting CD4 regulatory T cell %CD4 regulatory T cell	21.3069	0.00616463
rs187089343	A	C	-0.9956	0.1693	4.52e-09	3437	Activated & secreting CD4 regulatory T cell %CD4 regulatory T cell	34.5623	0.00996158
rs189383	T	C	0.1316	0.02943	8.08e-06	3437	Activated & secreting CD4 regulatory T cell %CD4 regulatory T cell	19.9838	0.00578406
rs191384725	A	G	-0.8475	0.1874	6.35e-06	3437	Activated & secreting CD4 regulatory T cell %CD4 regulatory T cell	20.4403	0.0059154
rs192123974	C	T	-1.546	0.3144	9.19e-07	3437	Activated & secreting CD4 regulatory T cell %CD4 regulatory T cell	24.1658	0.00698602
rs60220946	C	T	-0.4053	0.07676	1.37e-07	3437	Activated & secreting CD4 regulatory T cell %CD4 regulatory T cell	27.8632	0.00804628
rs61828007	A	G	-0.356	0.06849	2.13e-07	3437	Activated & secreting CD4 regulatory T cell %CD4 regulatory T cell	27.0018	0.00779948
rs6751481	T	C	-0.2903	0.02227	6.29e-38	3437	Activated & secreting CD4 regulatory T cell %CD4 regulatory T cell	169.825	0.0471104
rs72651876	C	T	-0.1135	0.02516	6.64e-06	3437	Activated & secreting CD4 regulatory T cell %CD4 regulatory T cell	20.3384	0.00588609
rs73579441	T	C	-0.1959	0.04424	9.82e-06	3437	Activated & secreting CD4 regulatory T cell %CD4 regulatory T cell	19.5968	0.00567268
rs7530076	G	A	0.4611	0.07373	4.5e-10	3437	Activated & secreting CD4 regulatory T cell %CD4 regulatory T cell	39.0885	0.0112514
rs76109501	G	A	-0.8373	0.1852	6.33e-06	3437	Activated & secreting CD4 regulatory T cell %CD4 regulatory T cell	20.4281	0.00591188
rs78181865	G	A	-2.709	0.5951	5.51e-06	3437	Activated & secreting CD4 regulatory T cell %CD4 regulatory T cell	20.7102	0.00599305
rs9274712	C	T	0.1731	0.03457	5.81e-07	3437	Activated & secreting CD4 regulatory T cell %CD4 regulatory T cell	25.0578	0.00724201
rs10188255	G	A	0.2504	0.05522	5.96e-06	3668	CD8+ Natural Killer T %lymphocyte	20.5513	0.00557466
rs11544989	A	G	0.1222	0.02527	1.39e-06	3668	CD8+ Natural Killer T %lymphocyte	23.372	0.00633494
rs11650003	A	G	-0.1138	0.02535	7.34e-06	3668	CD8+ Natural Killer T %lymphocyte	20.1415	0.00546411
rs11658954	A	G	-0.1113	0.02471	6.91e-06	3668	CD8+ Natural Killer T %lymphocyte	20.2772	0.00550073
rs117122100	C	T	-0.4752	0.1027	3.84e-06	3668	CD8+ Natural Killer T %lymphocyte	21.3981	0.00580303
rs117499937	G	A	-0.4541	0.1007	6.73e-06	3668	CD8+ Natural Killer T %lymphocyte	20.3239	0.00551333
rs12363646	T	C	0.1113	0.02481	7.41e-06	3668	CD8+ Natural Killer T %lymphocyte	20.1141	0.00545671
rs12499194	C	T	0.1947	0.04376	8.9e-06	3668	CD8+ Natural Killer T %lymphocyte	19.7852	0.00536797
rs12792298	C	T	-0.3039	0.06611	4.44e-06	3668	CD8+ Natural Killer T %lymphocyte	21.1198	0.005728
rs144156455	T	C	0.324	0.06651	1.15e-06	3668	CD8+ Natural Killer T %lymphocyte	23.7181	0.00642815
rs17256404	A	C	0.1761	0.0393	7.69e-06	3668	CD8+ Natural Killer T %lymphocyte	20.0677	0.00544419
rs2074023	C	T	-0.1242	0.02469	5.06e-07	3668	CD8+ Natural Killer T %lymphocyte	25.2909	0.0068515
rs2395191	T	C	0.1479	0.0299	7.87e-07	3668	CD8+ Natural Killer T %lymphocyte	24.4544	0.00662639
rs34575510	C	T	0.2652	0.05718	3.64e-06	3668	CD8+ Natural Killer T %lymphocyte	21.4992	0.00583029
rs34994982	A	G	-0.1981	0.04193	2.39e-06	3668	CD8+ Natural Killer T %lymphocyte	22.3091	0.0060486
rs56297703	T	C	-0.1404	0.03105	6.32e-06	3668	CD8+ Natural Killer T %lymphocyte	20.435	0.00554329
rs60553229	G	A	-1.466	0.3182	4.19e-06	3668	CD8+ Natural Killer T %lymphocyte	21.2144	0.0057535
rs61815774	C	T	-0.5546	0.1246	8.76e-06	3668	CD8+ Natural Killer T %lymphocyte	19.801	0.00537223
rs725683	C	T	-0.1213	0.02557	2.18e-06	3668	CD8+ Natural Killer T %lymphocyte	22.4918	0.00609782
rs75361910	C	T	-0.1928	0.03853	5.85e-07	3668	CD8+ Natural Killer T %lymphocyte	25.0253	0.00678004
rs78268116	C	T	-0.3961	0.03859	2.18e-24	3668	CD8+ Natural Killer T %lymphocyte	105.299	0.0279211
rs10892953	A	G	-0.1466	0.03268	7.52e-06	3652	CD8dim Natural Killer T Absolute Count	20.1125	0.00548008
rs111273508	G	A	0.5462	0.1137	1.63e-06	3652	CD8dim Natural Killer T Absolute Count	23.0645	0.00627937
rs11544989	A	G	0.1277	0.02521	4.27e-07	3652	CD8dim Natural Killer T Absolute Count	25.6447	0.00697693
rs115536607	C	T	0.3487	0.05419	1.4e-10	3652	CD8dim Natural Killer T Absolute Count	41.3835	0.0112108
rs116700304	G	A	-0.7877	0.1752	7.16e-06	3652	CD8dim Natural Killer T Absolute Count	20.203	0.0055046
rs11676464	G	A	-0.1853	0.0392	2.37e-06	3652	CD8dim Natural Killer T Absolute Count	22.3327	0.00608133
rs117147408	A	G	0.6679	0.0755	1.38e-18	3652	CD8dim Natural Killer T Absolute Count	78.2152	0.0209793
rs139090356	A	G	0.9023	0.1958	4.18e-06	3652	CD8dim Natural Killer T Absolute Count	21.2246	0.00578133
rs145331774	C	T	-0.3842	0.08337	4.2e-06	3652	CD8dim Natural Killer T Absolute Count	21.2255	0.00578157
rs34124324	A	G	-0.2049	0.04589	8.27e-06	3652	CD8dim Natural Killer T Absolute Count	19.9255	0.00542941
rs35840380	C	T	0.3268	0.06915	2.37e-06	3652	CD8dim Natural Killer T Absolute Count	22.3224	0.00607856
rs4500996	C	T	0.1566	0.03158	7.44e-07	3652	CD8dim Natural Killer T Absolute Count	24.5766	0.00668827
rs62126783	G	A	-0.1143	0.0248	4.23e-06	3652	CD8dim Natural Killer T Absolute Count	21.2301	0.00578282
rs62210845	G	A	0.1224	0.02717	6.84e-06	3652	CD8dim Natural Killer T Absolute Count	20.2836	0.00552645
rs6970303	T	C	0.1197	0.02607	4.51e-06	3652	CD8dim Natural Killer T Absolute Count	21.0702	0.00573952
rs7152367	G	A	0.4704	0.09391	5.71e-07	3652	CD8dim Natural Killer T Absolute Count	25.0769	0.00682349
rs7208329	C	T	-0.3314	0.0699	2.21e-06	3652	CD8dim Natural Killer T Absolute Count	22.4653	0.00611723
rs73062743	C	T	-0.1793	0.0387	3.71e-06	3652	CD8dim Natural Killer T Absolute Count	21.4536	0.00584336
rs7323005	A	G	-0.1507	0.03332	6.34e-06	3652	CD8dim Natural Killer T Absolute Count	20.4446	0.00557006
rs77738700	G	A	-0.3231	0.03929	2.69e-16	3652	CD8dim Natural Killer T Absolute Count	67.5884	0.0181807
rs79251210	G	A	0.5556	0.0646	1.16e-17	3652	CD8dim Natural Killer T Absolute Count	73.9301	0.0198527
rs80109323	C	T	1.516	0.3409	8.92e-06	3652	CD8dim Natural Killer T Absolute Count	19.7654	0.00538602
rs9916257	G	T	0.1472	0.02455	2.2e-09	3652	CD8dim Natural Killer T Absolute Count	35.9314	0.00974827
rs113413210	T	C	0.2544	0.05618	6.1e-06	3668	CD8dim Natural Killer T %T cell	20.4943	0.0055593
rs11544989	A	G	0.1399	0.02533	3.56e-08	3668	CD8dim Natural Killer T %T cell	30.4879	0.00824781
rs115536607	C	T	0.3978	0.05455	3.73e-13	3668	CD8dim Natural Killer T %T cell	53.15	0.0142909
rs117147408	A	G	0.7354	0.07599	6.79e-22	3668	CD8dim Natural Killer T %T cell	93.6047	0.0248975
rs12871857	C	T	-0.2409	0.05202	3.76e-06	3668	CD8dim Natural Killer T %T cell	21.4336	0.00581262
rs139090356	A	G	0.8992	0.1974	5.42e-06	3668	CD8dim Natural Killer T %T cell	20.7387	0.00562521
rs142704274	G	A	-0.4672	0.08984	2.1e-07	3668	CD8dim Natural Killer T %T cell	27.029	0.00731891
rs4500996	C	T	0.1496	0.03177	2.58e-06	3668	CD8dim Natural Killer T %T cell	22.1611	0.00600872
rs5998010	C	T	0.2127	0.04735	7.27e-06	3668	CD8dim Natural Killer T %T cell	20.1678	0.00547121
rs61925057	C	T	-0.435	0.09332	3.25e-06	3668	CD8dim Natural Killer T %T cell	21.7166	0.00588891
rs6970303	T	C	0.1169	0.02625	8.71e-06	3668	CD8dim Natural Killer T %T cell	19.8214	0.00537773
rs7152367	G	A	0.4594	0.0947	1.28e-06	3668	CD8dim Natural Killer T %T cell	23.5204	0.00637493
rs73062743	C	T	-0.1823	0.03896	3e-06	3668	CD8dim Natural Killer T %T cell	21.8826	0.00593364
rs7323005	A	G	-0.1579	0.03357	2.63e-06	3668	CD8dim Natural Killer T %T cell	22.1118	0.00599543
rs77738700	G	A	-0.3265	0.03954	2.06e-16	3668	CD8dim Natural Killer T %T cell	68.1485	0.0182501
rs79251210	G	A	0.5985	0.06505	5.81e-20	3668	CD8dim Natural Killer T %T cell	84.6052	0.0225577
rs10892953	A	G	-0.1467	0.03278	7.87e-06	3668	CD8dim Natural Killer T %lymphocyte	20.0173	0.0054306
rs113413210	T	C	0.2515	0.05593	7.1e-06	3668	CD8dim Natural Killer T %lymphocyte	20.2092	0.00548238
rs11544989	A	G	0.1407	0.02521	2.55e-08	3668	CD8dim Natural Killer T %lymphocyte	31.1319	0.00842055
rs115536607	C	T	0.3865	0.05433	1.35e-12	3668	CD8dim Natural Killer T %lymphocyte	50.5805	0.0136094
rs11676464	G	A	-0.1753	0.03934	8.64e-06	3668	CD8dim Natural Killer T %lymphocyte	19.8453	0.0053842
rs117147408	A	G	0.7078	0.07572	1.51e-20	3668	CD8dim Natural Killer T %lymphocyte	87.3299	0.0232673
rs12871857	C	T	-0.241	0.05179	3.38e-06	3668	CD8dim Natural Killer T %lymphocyte	21.6424	0.0058689
rs139090356	A	G	0.892	0.1966	5.86e-06	3668	CD8dim Natural Killer T %lymphocyte	20.5743	0.00558088
rs17304450	G	A	0.5445	0.1211	7.13e-06	3668	CD8dim Natural Killer T %lymphocyte	20.2055	0.00548139
rs35237642	T	C	0.4474	0.09626	3.47e-06	3668	CD8dim Natural Killer T %lymphocyte	21.5905	0.00585492
rs4500996	C	T	0.1486	0.03163	2.74e-06	3668	CD8dim Natural Killer T %lymphocyte	22.0598	0.00598142
rs5998010	C	T	0.209	0.04714	9.53e-06	3668	CD8dim Natural Killer T %lymphocyte	19.6461	0.00533044
rs61925057	C	T	-0.4301	0.09291	3.79e-06	3668	CD8dim Natural Killer T %lymphocyte	21.4179	0.00580838
rs62287820	A	G	0.416	0.09352	8.93e-06	3668	CD8dim Natural Killer T %lymphocyte	19.7761	0.00536552
rs6970303	T	C	0.1164	0.02613	8.71e-06	3668	CD8dim Natural Killer T %lymphocyte	19.8331	0.0053809
rs7152367	G	A	0.4611	0.09428	1.05e-06	3668	CD8dim Natural Killer T %lymphocyte	23.9064	0.00647886
rs7208329	C	T	-0.3543	0.0699	4.2e-07	3668	CD8dim Natural Killer T %lymphocyte	25.6774	0.00695548
rs73062743	C	T	-0.1853	0.03878	1.85e-06	3668	CD8dim Natural Killer T %lymphocyte	22.8191	0.00618602
rs7323005	A	G	-0.157	0.03342	2.71e-06	3668	CD8dim Natural Killer T %lymphocyte	22.0572	0.0059807
rs7589893	C	T	-0.1159	0.02547	5.5e-06	3668	CD8dim Natural Killer T %lymphocyte	20.6953	0.00561351
rs77738700	G	A	-0.3205	0.03937	5.38e-16	3668	CD8dim Natural Killer T %lymphocyte	66.2351	0.0177468
rs79251210	G	A	0.5857	0.06479	2.47e-19	3668	CD8dim Natural Killer T %lymphocyte	81.6766	0.0217939
rs9916257	G	T	0.1437	0.02463	5.79e-09	3668	CD8dim Natural Killer T %lymphocyte	34.0211	0.00919483
rs11124150	A	G	-0.1283	0.02509	3.33e-07	3652	CD4-CD8- Natural Killer T Absolute Count	26.1345	0.00710923
rs112708092	C	T	-0.1625	0.03646	8.56e-06	3652	CD4-CD8- Natural Killer T Absolute Count	19.8534	0.00540987
rs12143791	A	G	-0.1199	0.02601	4.19e-06	3652	CD4-CD8- Natural Killer T Absolute Count	21.2383	0.00578505
rs13108209	G	A	-0.1282	0.02676	1.73e-06	3652	CD4-CD8- Natural Killer T Absolute Count	22.9385	0.00624529
rs1473232	T	G	0.1269	0.0282	6.98e-06	3652	CD4-CD8- Natural Killer T Absolute Count	20.2389	0.00551433
rs62290986	C	A	-0.2347	0.05212	6.91e-06	3652	CD4-CD8- Natural Killer T Absolute Count	20.2665	0.00552182
rs6785704	A	G	-0.1853	0.0416	8.65e-06	3652	CD4-CD8- Natural Killer T Absolute Count	19.8302	0.00540356
rs11124150	A	G	-0.118	0.02536	3.39e-06	3668	CD4-CD8- Natural Killer T %T cell	21.6386	0.00586787
rs113145300	A	G	0.3542	0.07489	2.34e-06	3668	CD4-CD8- Natural Killer T %T cell	22.357	0.00606149
rs113413210	T	C	0.2529	0.05613	6.82e-06	3668	CD4-CD8- Natural Killer T %T cell	20.2895	0.00550404
rs115536607	C	T	0.3694	0.05436	1.25e-11	3668	CD4-CD8- Natural Killer T %T cell	46.1528	0.0124329
rs117147408	A	G	0.7037	0.07581	2.75e-20	3668	CD4-CD8- Natural Killer T %T cell	86.1163	0.0229514
rs12792298	C	T	-0.3195	0.06599	1.34e-06	3668	CD4-CD8- Natural Killer T %T cell	23.4287	0.00635023
rs13108209	G	A	-0.1293	0.02706	1.83e-06	3668	CD4-CD8- Natural Killer T %T cell	22.8194	0.0061861
rs140444563	T	G	0.1815	0.04013	6.27e-06	3668	CD4-CD8- Natural Killer T %T cell	20.4446	0.00554588
rs149977848	G	A	0.4373	0.09824	8.8e-06	3668	CD4-CD8- Natural Killer T %T cell	19.8037	0.00537295
rs188455143	G	A	0.3624	0.07414	1.07e-06	3668	CD4-CD8- Natural Killer T %T cell	23.88	0.00647176
rs190676386	G	A	-0.4738	0.1067	9.22e-06	3668	CD4-CD8- Natural Killer T %T cell	19.7072	0.00534692
rs192734627	G	A	0.3099	0.06475	1.77e-06	3668	CD4-CD8- Natural Killer T %T cell	22.8943	0.00620627
rs250103	G	A	-0.1271	0.02741	3.68e-06	3668	CD4-CD8- Natural Killer T %T cell	21.49	0.00582781
rs265772	T	G	-0.2033	0.04472	5.63e-06	3668	CD4-CD8- Natural Killer T %T cell	20.6554	0.00560276
rs3102960	C	T	0.1238	0.02784	8.93e-06	3668	CD4-CD8- Natural Killer T %T cell	19.7636	0.00536214
rs41274520	G	T	0.4126	0.08984	4.52e-06	3668	CD4-CD8- Natural Killer T %T cell	21.0806	0.00571741
rs61925057	C	T	-0.4323	0.09282	3.31e-06	3668	CD4-CD8- Natural Killer T %T cell	21.6796	0.00587892
rs6785704	A	G	-0.1984	0.04206	2.48e-06	3668	CD4-CD8- Natural Killer T %T cell	22.2386	0.00602961
rs7569868	C	T	0.2272	0.03147	6.35e-13	3668	CD4-CD8- Natural Killer T %T cell	52.0938	0.0140109
rs76158038	T	C	-0.2398	0.05288	5.95e-06	3668	CD4-CD8- Natural Killer T %T cell	20.5532	0.00557517
rs76333352	C	T	0.6269	0.1403	8.09e-06	3668	CD4-CD8- Natural Killer T %T cell	19.9547	0.0054137
rs77738700	G	A	-0.3832	0.0392	2.68e-22	3668	CD4-CD8- Natural Killer T %T cell	95.5085	0.025391
rs79251210	G	A	0.564	0.06488	5.29e-18	3668	CD4-CD8- Natural Killer T %T cell	75.5266	0.020186
rs9509337	G	A	-0.1319	0.0287	4.45e-06	3668	CD4-CD8- Natural Killer T %T cell	21.11	0.00572536
rs9896155	A	G	0.1336	0.02612	3.33e-07	3668	CD4-CD8- Natural Killer T %T cell	26.1475	0.00708191
rs9983338	C	T	-0.4132	0.09071	5.39e-06	3668	CD4-CD8- Natural Killer T %T cell	20.7383	0.00562511
rs11124150	A	G	-0.1185	0.02525	2.8e-06	3668	CD4-CD8- Natural Killer T %lymphocyte	22.0129	0.00596877
rs113413210	T	C	0.2508	0.0559	7.49e-06	3668	CD4-CD8- Natural Killer T %lymphocyte	20.1185	0.0054579
rs115536607	C	T	0.3576	0.05416	4.64e-11	3668	CD4-CD8- Natural Killer T %lymphocyte	43.5713	0.0117457
rs11579742	C	T	-0.5199	0.1161	7.79e-06	3668	CD4-CD8- Natural Killer T %lymphocyte	20.0419	0.00543723
rs117147408	A	G	0.675	0.07557	6.5e-19	3668	CD4-CD8- Natural Killer T %lymphocyte	79.7392	0.021288
rs11759822	G	T	0.1268	0.02693	2.58e-06	3668	CD4-CD8- Natural Killer T %lymphocyte	22.1579	0.00600785
rs12792298	C	T	-0.3106	0.06573	2.38e-06	3668	CD4-CD8- Natural Killer T %lymphocyte	22.3172	0.00605077
rs140444563	T	G	0.1844	0.03996	4.09e-06	3668	CD4-CD8- Natural Killer T %lymphocyte	21.2831	0.00577202
rs149977848	G	A	0.4432	0.09784	6.09e-06	3668	CD4-CD8- Natural Killer T %lymphocyte	20.5083	0.00556307
rs188455143	G	A	0.3487	0.07386	2.43e-06	3668	CD4-CD8- Natural Killer T %lymphocyte	22.2766	0.00603983
rs192734627	G	A	0.306	0.06449	2.17e-06	3668	CD4-CD8- Natural Killer T %lymphocyte	22.502	0.00610058
rs265772	T	G	-0.2013	0.04454	6.39e-06	3668	CD4-CD8- Natural Killer T %lymphocyte	20.415	0.00553791
rs61925057	C	T	-0.4258	0.09245	4.25e-06	3668	CD4-CD8- Natural Killer T %lymphocyte	21.2012	0.00574995
rs6785704	A	G	-0.1997	0.04189	1.93e-06	3668	CD4-CD8- Natural Killer T %lymphocyte	22.7143	0.00615777
rs72784218	G	A	0.2338	0.0512	5.11e-06	3668	CD4-CD8- Natural Killer T %lymphocyte	20.8407	0.00565272
rs73191859	A	G	0.1799	0.03903	4.16e-06	3668	CD4-CD8- Natural Killer T %lymphocyte	21.2338	0.00575874
rs7569868	C	T	0.2197	0.03135	2.88e-12	3668	CD4-CD8- Natural Killer T %lymphocyte	49.0849	0.0132123
rs76158038	T	C	-0.2382	0.05267	6.28e-06	3668	CD4-CD8- Natural Killer T %lymphocyte	20.4418	0.00554514
rs76333352	C	T	0.6311	0.1397	6.46e-06	3668	CD4-CD8- Natural Killer T %lymphocyte	20.397	0.00553305
rs77738700	G	A	-0.3774	0.03905	7.85e-22	3668	CD4-CD8- Natural Killer T %lymphocyte	93.3523	0.024832
rs79251210	G	A	0.5505	0.06465	2.39e-17	3668	CD4-CD8- Natural Killer T %lymphocyte	72.4671	0.0193842
rs8054431	G	T	0.1122	0.0252	8.7e-06	3668	CD4-CD8- Natural Killer T %lymphocyte	19.8129	0.00537545
rs9509337	G	A	-0.1273	0.02859	8.73e-06	3668	CD4-CD8- Natural Killer T %lymphocyte	19.8149	0.00537599
rs9916629	T	C	0.1378	0.02431	1.54e-08	3668	CD4-CD8- Natural Killer T %lymphocyte	32.1138	0.00868383
rs9983338	C	T	-0.416	0.09034	4.27e-06	3668	CD4-CD8- Natural Killer T %lymphocyte	21.1929	0.0057477
rs11822514	T	C	-0.1251	0.02742	5.26e-06	3653	CD3- lymphocyte Absolute Count	20.8038	0.00566582
rs12616821	T	C	0.1153	0.02515	4.72e-06	3653	CD3- lymphocyte Absolute Count	21.0061	0.0057206
rs12915752	A	C	-0.1186	0.02542	3.18e-06	3653	CD3- lymphocyte Absolute Count	21.7561	0.00592364
rs17617028	G	A	0.133	0.02757	1.46e-06	3653	CD3- lymphocyte Absolute Count	23.259	0.00633027
rs17824379	A	G	-1.353	0.2268	2.63e-09	3653	CD3- lymphocyte Absolute Count	35.569	0.00964827
rs184712	C	T	-0.1885	0.041	4.41e-06	3653	CD3- lymphocyte Absolute Count	21.126	0.00575307
rs3795066	C	T	-0.1125	0.02526	8.67e-06	3653	CD3- lymphocyte Absolute Count	19.8244	0.00540054
rs4796089	T	C	0.1842	0.03661	5.1e-07	3653	CD3- lymphocyte Absolute Count	25.3012	0.00688226
rs55738889	C	T	-0.2945	0.06347	3.61e-06	3653	CD3- lymphocyte Absolute Count	21.5177	0.00585911
rs61766955	A	G	0.4159	0.09047	4.43e-06	3653	CD3- lymphocyte Absolute Count	21.1218	0.00575193
rs76620602	A	C	-0.2803	0.05994	3.03e-06	3653	CD3- lymphocyte Absolute Count	21.8562	0.00595074
rs9894744	C	A	-0.1278	0.02618	1.11e-06	3653	CD3- lymphocyte Absolute Count	23.8169	0.0064811
rs11184230	C	T	-0.1946	0.03983	1.08e-06	3657	IgD+ CD24- B cell %B cell	23.8576	0.00648507
rs116844769	G	A	-0.2773	0.0514	7.3e-08	3657	IgD+ CD24- B cell %B cell	29.0895	0.00789597
rs12465275	T	C	-0.6051	0.136	8.84e-06	3657	IgD+ CD24- B cell %B cell	19.7851	0.00538402
rs140191306	C	T	0.4404	0.09513	3.8e-06	3657	IgD+ CD24- B cell %B cell	21.4201	0.00582635
rs145123647	C	T	1.016	0.2269	7.68e-06	3657	IgD+ CD24- B cell %B cell	20.0392	0.00545279
rs182854545	C	T	1.363	0.3003	5.85e-06	3657	IgD+ CD24- B cell %B cell	20.5894	0.00560166
rs1972883	G	A	-0.1408	0.03125	6.89e-06	3657	IgD+ CD24- B cell %B cell	20.2893	0.00552047
rs2450220	C	T	-0.1439	0.03231	8.69e-06	3657	IgD+ CD24- B cell %B cell	19.8249	0.00539478
rs35698683	A	G	0.2735	0.06003	5.36e-06	3657	IgD+ CD24- B cell %B cell	20.7463	0.0056441
rs45608038	A	G	-0.2927	0.06326	3.85e-06	3657	IgD+ CD24- B cell %B cell	21.3968	0.00582006
rs56335940	G	A	-0.1728	0.03773	4.84e-06	3657	IgD+ CD24- B cell %B cell	20.9641	0.00570302
rs58706313	C	T	-0.3021	0.06737	7.53e-06	3657	IgD+ CD24- B cell %B cell	20.097	0.00546842
rs6910508	G	A	0.1159	0.0255	5.71e-06	3657	IgD+ CD24- B cell %B cell	20.6466	0.00561714
rs73426855	T	C	-0.1632	0.03539	4.14e-06	3657	IgD+ CD24- B cell %B cell	21.254	0.00578144
rs7412746	C	T	0.1263	0.02588	1.11e-06	3657	IgD+ CD24- B cell %B cell	23.8035	0.00647044
rs75766272	C	T	0.483	0.08768	3.86e-08	3657	IgD+ CD24- B cell %B cell	30.3288	0.00822961
rs78958229	C	T	0.2723	0.06041	6.74e-06	3657	IgD+ CD24- B cell %B cell	20.3067	0.00552518
rs17615220	A	G	0.1588	0.03288	1.42e-06	3669	CD3- lymphocyte %lymphocyte	23.3131	0.00631739
rs1874323	T	C	0.157	0.03445	5.39e-06	3669	CD3- lymphocyte %lymphocyte	20.7579	0.00562888
rs241580	A	G	0.2806	0.06288	8.36e-06	3669	CD3- lymphocyte %lymphocyte	19.9028	0.00539823
rs34147569	T	C	-0.1298	0.02927	9.5e-06	3669	CD3- lymphocyte %lymphocyte	19.6547	0.00533132
rs10925924	T	G	-0.1944	0.03852	4.77e-07	3437	Activated & secreting CD4 regulatory T cell %CD4+ T cell	25.4547	0.00735587
rs11221698	C	T	-0.1382	0.0306	6.53e-06	3437	Activated & secreting CD4 regulatory T cell %CD4+ T cell	20.3855	0.00589962
rs113435341	A	G	-2.11	0.2195	1.31e-21	3437	Activated & secreting CD4 regulatory T cell %CD4+ T cell	92.3513	0.0261815
rs11579717	G	A	-1.573	0.1855	3.35e-17	3437	Activated & secreting CD4 regulatory T cell %CD4+ T cell	71.8649	0.0204926
rs11655776	A	G	0.2327	0.05214	8.35e-06	3437	Activated & secreting CD4 regulatory T cell %CD4+ T cell	19.9066	0.00576185
rs12642085	C	T	-0.1149	0.02598	9.94e-06	3437	Activated & secreting CD4 regulatory T cell %CD4+ T cell	19.5483	0.00565871
rs12712610	A	G	-0.1572	0.02752	1.21e-08	3437	Activated & secreting CD4 regulatory T cell %CD4+ T cell	32.6103	0.00940427
rs138915779	C	A	-1.565	0.2272	6.75e-12	3437	Activated & secreting CD4 regulatory T cell %CD4+ T cell	47.4197	0.0136169
rs138960714	A	C	-2.923	0.4989	5.13e-09	3437	Activated & secreting CD4 regulatory T cell %CD4+ T cell	34.3066	0.00988861
rs143166038	G	A	1.332	0.2918	5.15e-06	3437	Activated & secreting CD4 regulatory T cell %CD4+ T cell	20.825	0.00602606
rs143290109	C	T	-2.089	0.4694	8.89e-06	3437	Activated & secreting CD4 regulatory T cell %CD4+ T cell	19.7942	0.00572949
rs145444215	G	A	-1.986	0.4154	1.83e-06	3437	Activated & secreting CD4 regulatory T cell %CD4+ T cell	22.844	0.00660644
rs146512168	T	C	-2.494	0.5458	5.09e-06	3437	Activated & secreting CD4 regulatory T cell %CD4+ T cell	20.8676	0.00603832
rs1465510	G	A	-0.1198	0.0267	7.43e-06	3437	Activated & secreting CD4 regulatory T cell %CD4+ T cell	20.1205	0.00582338
rs147838148	T	G	-2.662	0.4776	2.68e-08	3437	Activated & secreting CD4 regulatory T cell %CD4+ T cell	31.0481	0.00895777
rs149703905	A	G	-2.484	0.5461	5.59e-06	3437	Activated & secreting CD4 regulatory T cell %CD4+ T cell	20.6779	0.00598374
rs186715000	A	G	-2.136	0.466	4.75e-06	3437	Activated & secreting CD4 regulatory T cell %CD4+ T cell	20.998	0.00607581
rs2668533	C	T	-0.131	0.02803	3.09e-06	3437	Activated & secreting CD4 regulatory T cell %CD4+ T cell	21.8295	0.00631489
rs2958568	A	C	0.1207	0.02532	1.94e-06	3437	Activated & secreting CD4 regulatory T cell %CD4+ T cell	22.7109	0.00656819
rs35378667	T	C	-0.5302	0.1029	2.72e-07	3437	Activated & secreting CD4 regulatory T cell %CD4+ T cell	26.5336	0.00766527
rs4901222	C	T	-2.838	0.5947	1.89e-06	3437	Activated & secreting CD4 regulatory T cell %CD4+ T cell	22.7602	0.00658235
rs6065288	C	T	0.1447	0.03148	4.43e-06	3437	Activated & secreting CD4 regulatory T cell %CD4+ T cell	21.1162	0.00610979
rs61839660	C	T	0.4097	0.05516	1.38e-13	3437	Activated & secreting CD4 regulatory T cell %CD4+ T cell	55.1354	0.0157975
rs74830391	C	T	0.1992	0.03616	3.87e-08	3437	Activated & secreting CD4 regulatory T cell %CD4+ T cell	30.3298	0.00875235
rs10282551	A	G	0.2289	0.04732	1.37e-06	3669	CD3- lymphocyte %leukocyte	23.3865	0.00633714
rs10484980	T	C	-0.9915	0.2214	7.75e-06	3669	CD3- lymphocyte %leukocyte	20.0444	0.00543645
rs11870294	A	C	-0.1257	0.0283	9.16e-06	3669	CD3- lymphocyte %leukocyte	19.7179	0.00534836
rs12874404	A	G	0.1221	0.02703	6.41e-06	3669	CD3- lymphocyte %leukocyte	20.394	0.00553074
rs144820681	T	C	0.6097	0.1337	5.29e-06	3669	CD3- lymphocyte %leukocyte	20.7842	0.00563595
rs145179037	C	T	-1.173	0.261	7.15e-06	3669	CD3- lymphocyte %leukocyte	20.1873	0.00547499
rs146347528	G	A	0.3699	0.08266	7.86e-06	3669	CD3- lymphocyte %leukocyte	20.0143	0.00542833
rs146849959	C	A	0.4251	0.0928	4.79e-06	3669	CD3- lymphocyte %leukocyte	20.9725	0.00568672
rs1476462	G	A	0.1577	0.03508	7.22e-06	3669	CD3- lymphocyte %leukocyte	20.198	0.00547786
rs1649973	A	G	-0.1762	0.0361	1.11e-06	3669	CD3- lymphocyte %leukocyte	23.8101	0.00645118
rs17824379	A	G	-1.044	0.2302	5.97e-06	3669	CD3- lymphocyte %leukocyte	20.5567	0.00557461
rs1874323	T	C	0.1702	0.0359	2.2e-06	3669	CD3- lymphocyte %leukocyte	22.4643	0.00608878
rs3730790	G	A	-0.6578	0.1474	8.39e-06	3669	CD3- lymphocyte %leukocyte	19.9047	0.00539876
rs4581669	C	A	-0.1269	0.02569	8.14e-07	3669	CD3- lymphocyte %leukocyte	24.387	0.00660646
rs4796089	T	C	0.2194	0.0369	2.99e-09	3669	CD3- lymphocyte %leukocyte	35.3333	0.00954351
rs521446	G	A	0.1122	0.02479	6.16e-06	3669	CD3- lymphocyte %leukocyte	20.4737	0.00555222
rs76901853	C	T	0.3983	0.08977	9.38e-06	3669	CD3- lymphocyte %leukocyte	19.6753	0.00533687
rs77650974	G	A	-0.1324	0.02663	6.96e-07	3669	CD3- lymphocyte %leukocyte	24.7057	0.00669221
rs1057686	A	G	-0.1735	0.0364	1.96e-06	3653	B cell Absolute Count	22.7069	0.00618093
rs11627066	C	T	-0.1147	0.02444	2.81e-06	3653	B cell Absolute Count	22.0134	0.00599327
rs11666499	A	G	0.1913	0.0422	5.96e-06	3653	B cell Absolute Count	20.5384	0.00559396
rs117693242	A	G	-0.4542	0.09774	3.48e-06	3653	B cell Absolute Count	21.583	0.00587679
rs12865434	A	G	0.1537	0.02404	1.83e-10	3653	B cell Absolute Count	40.8546	0.0110661
rs13173982	G	A	0.1243	0.02807	9.78e-06	3653	B cell Absolute Count	19.5984	0.00533928
rs142089808	A	G	-1.048	0.1941	7.04e-08	3653	B cell Absolute Count	29.1363	0.00791717
rs144825213	G	A	-1.553	0.3457	7.28e-06	3653	B cell Absolute Count	20.17	0.00549417
rs17113368	C	T	0.1875	0.04172	7.19e-06	3653	B cell Absolute Count	20.1872	0.00549882
rs182527768	G	A	-0.3328	0.06652	5.91e-07	3653	B cell Absolute Count	25.0164	0.00680529
rs1897558	A	C	-0.1305	0.02801	3.3e-06	3653	B cell Absolute Count	21.6949	0.00590707
rs1966302	T	C	-0.1213	0.02419	5.52e-07	3653	B cell Absolute Count	25.1311	0.0068363
rs2033489	C	T	0.1073	0.02416	9.17e-06	3653	B cell Absolute Count	19.7137	0.00537053
rs2395904	T	G	-0.1269	0.02725	3.31e-06	3653	B cell Absolute Count	21.6747	0.0059016
rs35606919	T	G	0.1779	0.03926	6.02e-06	3653	B cell Absolute Count	20.5217	0.00558943
rs4933299	G	T	-0.1282	0.02869	8.17e-06	3653	B cell Absolute Count	19.9562	0.00543623
rs5009526	A	G	-0.1516	0.03391	8.01e-06	3653	B cell Absolute Count	19.9758	0.00544156
rs58114937	A	G	0.1852	0.03578	2.38e-07	3653	B cell Absolute Count	26.7771	0.00728078
rs62061834	T	C	0.2608	0.05507	2.26e-06	3653	B cell Absolute Count	22.4154	0.00610207
rs6750281	A	G	0.1112	0.02488	8.12e-06	3653	B cell Absolute Count	19.9651	0.00543865
rs7210666	T	C	-0.129	0.02915	9.87e-06	3653	B cell Absolute Count	19.5733	0.0053325
rs73520180	T	C	0.4493	0.08473	1.21e-07	3653	B cell Absolute Count	28.1035	0.00763868
rs7500855	C	T	-0.1258	0.02435	2.51e-07	3653	B cell Absolute Count	26.6763	0.00725357
rs75270114	T	G	0.2916	0.06479	6.97e-06	3653	B cell Absolute Count	20.2452	0.00551452
rs7834992	A	G	0.1209	0.02608	3.69e-06	3653	B cell Absolute Count	21.4783	0.00584844
rs9883798	C	A	0.1124	0.02525	8.78e-06	3653	B cell Absolute Count	19.8049	0.00539524
rs117515961	T	C	0.3137	0.07049	8.86e-06	3669	B cell %CD3- lymphocyte	19.7942	0.00536894
rs117732815	G	A	-0.196	0.04371	7.57e-06	3669	B cell %CD3- lymphocyte	20.0962	0.00545041
rs11954223	G	A	2.135	0.3629	4.36e-09	3669	B cell %CD3- lymphocyte	34.5927	0.00934537
rs12087279	C	T	0.1785	0.03618	8.39e-07	3669	B cell %CD3- lymphocyte	24.3278	0.00659052
rs12422149	G	A	-0.183	0.03848	2.05e-06	3669	B cell %CD3- lymphocyte	22.6045	0.00612654
rs142527102	T	C	0.7585	0.1625	3.16e-06	3669	B cell %CD3- lymphocyte	21.7755	0.00590317
rs17823772	C	T	0.2303	0.04468	2.67e-07	3669	B cell %CD3- lymphocyte	26.5537	0.0071892
rs183053322	C	T	0.3585	0.06592	5.72e-08	3669	B cell %CD3- lymphocyte	29.5602	0.00799667
rs191368650	G	T	-0.4144	0.08975	4.03e-06	3669	B cell %CD3- lymphocyte	21.3076	0.00577706
rs1915649	C	T	1.895	0.3691	2.99e-07	3669	B cell %CD3- lymphocyte	26.3447	0.00713302
rs2213306	G	A	0.1245	0.02736	5.51e-06	3669	B cell %CD3- lymphocyte	20.6952	0.00561196
rs281407	G	A	-0.1181	0.02511	2.63e-06	3669	B cell %CD3- lymphocyte	22.109	0.00599305
rs34588768	C	T	-0.4344	0.09129	2.03e-06	3669	B cell %CD3- lymphocyte	22.6306	0.00613357
rs4239087	T	C	0.5375	0.1201	7.79e-06	3669	B cell %CD3- lymphocyte	20.0186	0.00542949
rs61928632	T	C	0.3133	0.06991	7.63e-06	3669	B cell %CD3- lymphocyte	20.0727	0.00544407
rs72810613	A	G	-0.2812	0.0601	2.98e-06	3669	B cell %CD3- lymphocyte	21.8799	0.00593131
rs73520180	T	C	0.4161	0.08311	5.8e-07	3669	B cell %CD3- lymphocyte	25.0526	0.00678554
rs75210520	T	C	0.3064	0.06804	6.89e-06	3669	B cell %CD3- lymphocyte	20.2681	0.00549677
rs77438219	G	A	1.16	0.2377	1.1e-06	3669	B cell %CD3- lymphocyte	23.8024	0.00644911
rs77651542	T	C	0.2493	0.05617	9.32e-06	3669	B cell %CD3- lymphocyte	19.6879	0.00534026
rs78240988	C	A	-0.6305	0.1399	6.83e-06	3669	B cell %CD3- lymphocyte	20.3001	0.00550541
rs78468114	C	T	1.901	0.3949	1.55e-06	3669	B cell %CD3- lymphocyte	23.1608	0.00627636
rs9520836	A	G	0.1363	0.02361	8.45e-09	3669	B cell %CD3- lymphocyte	33.3091	0.00900171
rs9916257	G	T	0.1693	0.0237	1.08e-12	3669	B cell %CD3- lymphocyte	51.0012	0.0137174
rs112526427	G	T	0.3025	0.06807	9.1e-06	3669	B cell %lymphocyte	19.738	0.00535378
rs115698234	A	G	0.5437	0.1169	3.43e-06	3669	B cell %lymphocyte	21.6199	0.00586123
rs11627066	C	T	-0.1185	0.02483	1.9e-06	3669	B cell %lymphocyte	22.7639	0.00616947
rs12874404	A	G	0.2272	0.02633	8.99e-18	3669	B cell %lymphocyte	74.418	0.0198903
rs13108273	T	C	0.1849	0.04159	9.03e-06	3669	B cell %lymphocyte	19.7542	0.00535815
rs142089808	A	G	-1.044	0.1936	7.51e-08	3669	B cell %lymphocyte	29.0639	0.00786347
rs144426024	C	T	0.5227	0.114	4.71e-06	3669	B cell %lymphocyte	21.0116	0.00569726
rs150774187	G	A	0.1705	0.0357	1.86e-06	3669	B cell %lymphocyte	22.7969	0.00617836
rs1557987	A	G	0.1431	0.03213	8.64e-06	3669	B cell %lymphocyte	19.8254	0.00537735
rs1572133	G	A	-0.1398	0.03093	6.41e-06	3669	B cell %lymphocyte	20.4182	0.00553726
rs17113367	A	C	0.2019	0.04192	1.51e-06	3669	B cell %lymphocyte	23.1843	0.00628268
rs191368650	G	T	-0.4331	0.09277	3.14e-06	3669	B cell %lymphocyte	21.7833	0.00590529
rs2395904	T	G	-0.1413	0.02766	3.44e-07	3669	B cell %lymphocyte	26.0821	0.00706243
rs34588768	C	T	-0.42	0.0944	8.9e-06	3669	B cell %lymphocyte	19.7842	0.00536624
rs35911859	A	G	0.3174	0.06906	4.47e-06	3669	B cell %lymphocyte	21.1117	0.00572427
rs3738088	G	T	0.5216	0.1115	2.97e-06	3669	B cell %lymphocyte	21.872	0.00592919
rs4748742	C	T	0.1147	0.02437	2.61e-06	3669	B cell %lymphocyte	22.1401	0.00600142
rs536579180	G	A	0.5353	0.1097	1.12e-06	3669	B cell %lymphocyte	23.7982	0.00644799
rs55658072	A	G	0.1135	0.02541	8.23e-06	3669	B cell %lymphocyte	19.9409	0.00540853
rs58114937	A	G	0.1732	0.03637	2e-06	3669	B cell %lymphocyte	22.6659	0.00614307
rs66777340	C	T	-0.1493	0.02419	7.63e-10	3669	B cell %lymphocyte	38.0725	0.0102758
rs6985401	A	G	-0.4402	0.09906	9.12e-06	3669	B cell %lymphocyte	19.7363	0.00535334
rs72810052	G	A	0.8405	0.1836	4.83e-06	3669	B cell %lymphocyte	20.9456	0.00567948
rs73520190	T	G	0.4121	0.08319	7.62e-07	3669	B cell %lymphocyte	24.526	0.00664386
rs74535587	G	A	-0.4522	0.1022	9.95e-06	3669	B cell %lymphocyte	19.5669	0.00530763
rs7483614	T	C	0.1453	0.03221	6.68e-06	3669	B cell %lymphocyte	20.3382	0.00551569
rs77233730	C	T	-0.2127	0.04478	2.1e-06	3669	B cell %lymphocyte	22.5491	0.00611163
rs7990182	T	G	-0.1288	0.02457	1.69e-07	3669	B cell %lymphocyte	27.4653	0.00743418
rs9368867	C	A	-0.1301	0.02649	9.47e-07	3669	B cell %lymphocyte	24.1076	0.00653126
rs9520905	G	T	0.1266	0.02497	4.19e-07	3669	B cell %lymphocyte	25.6917	0.00695746
rs11637587	C	T	-0.8617	0.1945	9.71e-06	3653	Natural Killer Absolute Count	19.6171	0.00534436
rs1257331	C	T	0.1177	0.02464	1.83e-06	3653	Natural Killer Absolute Count	22.8052	0.00620751
rs13287806	G	A	0.1362	0.03024	6.86e-06	3653	Natural Killer Absolute Count	20.2746	0.0055225
rs150434441	A	G	-0.1121	0.0246	5.3e-06	3653	Natural Killer Absolute Count	20.7541	0.00565236
rs17824379	A	G	-1.189	0.2213	8.29e-08	3653	Natural Killer Absolute Count	28.8511	0.0078403
rs183053322	C	T	-0.3926	0.06648	3.83e-09	3653	Natural Killer Absolute Count	34.8563	0.00945676
rs184712	C	T	-0.188	0.03968	2.23e-06	3653	Natural Killer Absolute Count	22.4354	0.00610748
rs2922076	G	A	0.1148	0.02548	6.86e-06	3653	Natural Killer Absolute Count	20.2884	0.00552623
rs3789102	C	T	0.1119	0.02443	4.76e-06	3653	Natural Killer Absolute Count	20.9689	0.00571053
rs541558027	A	C	0.7623	0.1655	4.23e-06	3653	Natural Killer Absolute Count	21.204	0.00577419
rs55971447	C	T	-0.1314	0.02854	4.29e-06	3653	Natural Killer Absolute Count	21.1858	0.00576926
rs59536859	A	G	-0.1659	0.03479	1.92e-06	3653	Natural Killer Absolute Count	22.7272	0.00618642
rs74938505	C	T	-0.3533	0.07486	2.46e-06	3653	Natural Killer Absolute Count	22.2613	0.00606035
rs7736582	C	T	0.1787	0.0392	5.3e-06	3653	Natural Killer Absolute Count	20.7701	0.00565671
rs78664638	T	C	0.6198	0.1347	4.32e-06	3653	Natural Killer Absolute Count	21.1607	0.00576247
rs9916257	G	T	-0.2005	0.02398	8.82e-17	3653	Natural Killer Absolute Count	69.8703	0.0187779
rs111661128	G	A	0.3791	0.08035	2.47e-06	3669	Natural Killer %CD3- lymphocyte	22.2484	0.00603061
rs11954223	G	A	-2.093	0.3644	9.93e-09	3669	Natural Killer %CD3- lymphocyte	32.972	0.00891141
rs12087279	C	T	-0.1667	0.03634	4.64e-06	3669	Natural Killer %CD3- lymphocyte	21.0312	0.00570256
rs12874404	A	G	-0.1456	0.02572	1.6e-08	3669	Natural Killer %CD3- lymphocyte	32.029	0.00865877
rs142527102	T	C	-0.7471	0.1632	4.85e-06	3669	Natural Killer %CD3- lymphocyte	20.945	0.00567931
rs146445024	C	T	0.5	0.112	8.33e-06	3669	Natural Killer %CD3- lymphocyte	19.919	0.00540261
rs17823772	C	T	-0.2182	0.04488	1.21e-06	3669	Natural Killer %CD3- lymphocyte	23.6247	0.00640128
rs183053322	C	T	-0.4163	0.06609	3.35e-10	3669	Natural Killer %CD3- lymphocyte	39.6556	0.0106985
rs191368650	G	T	0.4173	0.09011	3.77e-06	3669	Natural Killer %CD3- lymphocyte	21.4345	0.00581128
rs1915649	C	T	-1.805	0.3707	1.17e-06	3669	Natural Killer %CD3- lymphocyte	23.6959	0.00642043
rs2213306	G	A	-0.1235	0.02747	7.1e-06	3669	Natural Killer %CD3- lymphocyte	20.2013	0.00547877
rs2433423	T	C	-0.4344	0.08962	1.3e-06	3669	Natural Killer %CD3- lymphocyte	23.4819	0.00636282
rs2623730	C	T	-1.015	0.2264	7.55e-06	3669	Natural Killer %CD3- lymphocyte	20.0883	0.00544827
rs281407	G	A	0.1175	0.02521	3.24e-06	3669	Natural Killer %CD3- lymphocyte	21.7117	0.00588598
rs34588768	C	T	0.4242	0.09167	3.82e-06	3669	Natural Killer %CD3- lymphocyte	21.4018	0.00580246
rs35483654	C	T	-0.521	0.1073	1.25e-06	3669	Natural Killer %CD3- lymphocyte	23.5635	0.00638479
rs4239087	T	C	-0.5865	0.1205	1.18e-06	3669	Natural Killer %CD3- lymphocyte	23.6769	0.00641533
rs55971447	C	T	-0.1488	0.02845	1.77e-07	3669	Natural Killer %CD3- lymphocyte	27.3404	0.00740061
rs56289531	G	T	0.2362	0.05234	6.61e-06	3669	Natural Killer %CD3- lymphocyte	20.3543	0.00552002
rs73520180	T	C	-0.3941	0.08347	2.44e-06	3669	Natural Killer %CD3- lymphocyte	22.28	0.00603912
rs77438219	G	A	-1.199	0.2386	5.33e-07	3669	Natural Killer %CD3- lymphocyte	25.2383	0.00683551
rs78468114	C	T	-1.834	0.3966	3.91e-06	3669	Natural Killer %CD3- lymphocyte	21.3726	0.00579458
rs9916257	G	T	-0.1909	0.02375	1.21e-15	3669	Natural Killer %CD3- lymphocyte	64.5725	0.0173044
rs10118740	G	A	-0.2745	0.05864	2.96e-06	3669	Natural Killer %lymphocyte	21.9008	0.00593694
rs10948071	C	T	0.1124	0.0236	1.97e-06	3669	Natural Killer %lymphocyte	22.6711	0.00614447
rs113667813	G	A	0.2542	0.05635	6.67e-06	3669	Natural Killer %lymphocyte	20.3389	0.00551586
rs115345454	A	C	0.7308	0.1644	8.98e-06	3669	Natural Killer %lymphocyte	19.7495	0.00535689
rs115644251	C	T	0.2646	0.05794	5.12e-06	3669	Natural Killer %lymphocyte	20.8442	0.00565215
rs11656115	A	G	0.1517	0.02853	1.12e-07	3669	Natural Killer %lymphocyte	28.2573	0.00764691
rs11954223	G	A	-1.682	0.3583	2.77e-06	3669	Natural Killer %lymphocyte	22.0253	0.00597049
rs144650982	C	T	0.5517	0.1242	9.09e-06	3669	Natural Killer %lymphocyte	19.7209	0.00534916
rs149863465	G	A	0.328	0.07247	6.18e-06	3669	Natural Killer %lymphocyte	20.4736	0.0055522
rs182077215	C	T	0.4364	0.09585	5.47e-06	3669	Natural Killer %lymphocyte	20.718	0.00561812
rs183053322	C	T	-0.408	0.06431	2.51e-10	3669	Natural Killer %lymphocyte	40.2278	0.0108512
rs2269705	T	C	0.1676	0.0362	3.76e-06	3669	Natural Killer %lymphocyte	21.4237	0.00580836
rs2426800	C	T	0.1023	0.02301	8.95e-06	3669	Natural Killer %lymphocyte	19.7552	0.00535842
rs2433423	T	C	-0.4268	0.0874	1.09e-06	3669	Natural Killer %lymphocyte	23.8336	0.0064575
rs2546701	A	G	0.105	0.0235	8.17e-06	3669	Natural Killer %lymphocyte	19.9529	0.00541176
rs281407	G	A	0.1157	0.0244	2.2e-06	3669	Natural Killer %lymphocyte	22.4724	0.00609096
rs281414	G	A	0.1347	0.02964	5.7e-06	3669	Natural Killer %lymphocyte	20.6415	0.00559749
rs3787412	C	A	-0.1923	0.04086	2.61e-06	3669	Natural Killer %lymphocyte	22.1373	0.00600068
rs57576269	C	A	-0.1329	0.02954	7.04e-06	3669	Natural Killer %lymphocyte	20.2298	0.00548646
rs62130952	G	A	-1.284	0.2783	4.08e-06	3669	Natural Killer %lymphocyte	21.2749	0.00576824
rs73027720	C	T	-0.9938	0.2183	5.5e-06	3669	Natural Killer %lymphocyte	20.7135	0.0056169
rs77438219	G	A	-1.131	0.2353	1.58e-06	3669	Natural Killer %lymphocyte	23.0911	0.0062576
rs7998044	T	C	0.2685	0.0595	6.59e-06	3669	Natural Killer %lymphocyte	20.3525	0.00551954
rs9916257	G	T	-0.2323	0.02306	1.51e-23	3669	Natural Killer %lymphocyte	101.425	0.0269143
rs111288272	A	G	0.2071	0.04628	7.87e-06	3580	HLA DR+ Natural Killer Absolute Count	20.0139	0.00556247
rs111621170	G	A	-0.1834	0.04097	7.77e-06	3580	HLA DR+ Natural Killer Absolute Count	20.0274	0.00556621
rs11264885	A	G	-0.1301	0.02887	6.77e-06	3580	HLA DR+ Natural Killer Absolute Count	20.2964	0.00564055
rs139025334	G	A	0.2213	0.04896	6.37e-06	3580	HLA DR+ Natural Killer Absolute Count	20.4191	0.00567447
rs182834114	A	G	-0.3144	0.06814	4.09e-06	3580	HLA DR+ Natural Killer Absolute Count	21.2774	0.00591157
rs1862176	G	A	-0.1305	0.02693	1.32e-06	3580	HLA DR+ Natural Killer Absolute Count	23.4696	0.00651667
rs2047610	G	A	-0.1575	0.03526	8.2e-06	3580	HLA DR+ Natural Killer Absolute Count	19.9413	0.00554242
rs370476	G	A	0.1342	0.03023	9.35e-06	3580	HLA DR+ Natural Killer Absolute Count	19.6964	0.00547472
rs4076588	C	A	0.117	0.02509	3.24e-06	3580	HLA DR+ Natural Killer Absolute Count	21.7334	0.0060375
rs4656251	A	G	-0.1228	0.02545	1.46e-06	3580	HLA DR+ Natural Killer Absolute Count	23.269	0.00646134
rs59613483	T	C	-0.2773	0.06131	6.3e-06	3580	HLA DR+ Natural Killer Absolute Count	20.4453	0.00568172
rs6750412	T	C	-0.1378	0.02874	1.68e-06	3580	HLA DR+ Natural Killer Absolute Count	22.9764	0.00638061
rs71632989	T	G	-0.6984	0.02689	2.05e-136	3580	HLA DR+ Natural Killer Absolute Count	674.193	0.158552
rs79168765	G	A	0.301	0.06685	6.91e-06	3580	HLA DR+ Natural Killer Absolute Count	20.2622	0.00563112
rs79676986	A	C	0.261	0.05757	6.01e-06	3580	HLA DR+ Natural Killer Absolute Count	20.5421	0.00570846
rs117338457	G	T	0.2936	0.06216	2.4e-06	3596	HLA DR+ Natural Killer %Natural Killer	22.2971	0.00616573
rs1176530	C	T	0.1191	0.0264	6.59e-06	3596	HLA DR+ Natural Killer %Natural Killer	20.3411	0.00562788
rs12462814	T	C	-0.112	0.02511	8.44e-06	3596	HLA DR+ Natural Killer %Natural Killer	19.8839	0.00550208
rs142307180	C	T	-0.3236	0.07233	7.91e-06	3596	HLA DR+ Natural Killer %Natural Killer	20.005	0.00553541
rs148177889	C	T	-0.5897	0.1233	1.8e-06	3596	HLA DR+ Natural Killer %Natural Killer	22.861	0.00632066
rs17119267	G	A	0.2832	0.06339	8.15e-06	3596	HLA DR+ Natural Killer %Natural Killer	19.9482	0.00551978
rs17307458	C	T	-0.5233	0.1123	3.28e-06	3596	HLA DR+ Natural Killer %Natural Killer	21.702	0.00600216
rs1862176	G	A	-0.14	0.02753	3.87e-07	3596	HLA DR+ Natural Killer %Natural Killer	25.8465	0.00714022
rs3135080	A	G	-0.1222	0.02602	2.77e-06	3596	HLA DR+ Natural Killer %Natural Killer	22.0438	0.00609611
rs4656251	A	G	-0.1236	0.02597	2e-06	3596	HLA DR+ Natural Killer %Natural Killer	22.6387	0.0062596
rs56329333	C	A	-1.166	0.258	6.35e-06	3596	HLA DR+ Natural Killer %Natural Killer	20.4134	0.00564779
rs61745530	G	T	-0.3593	0.07947	6.33e-06	3596	HLA DR+ Natural Killer %Natural Killer	20.4299	0.00565232
rs6833916	G	T	0.1416	0.03037	3.26e-06	3596	HLA DR+ Natural Killer %Natural Killer	21.7268	0.00600897
rs71424967	C	T	0.8583	0.178	1.48e-06	3596	HLA DR+ Natural Killer %Natural Killer	23.2379	0.00642421
rs71632989	T	G	-0.6848	0.02772	1.3e-124	3596	HLA DR+ Natural Killer %Natural Killer	609.957	0.145091
rs7180804	G	A	-0.2525	0.03019	8.74e-17	3596	HLA DR+ Natural Killer %Natural Killer	69.9125	0.0190814
rs72770017	G	A	-0.1367	0.02968	4.26e-06	3596	HLA DR+ Natural Killer %Natural Killer	21.2016	0.00586456
rs80171191	C	T	-0.1619	0.03433	2.49e-06	3596	HLA DR+ Natural Killer %Natural Killer	22.2282	0.00614679
rs865239	A	G	-0.1371	0.02509	4.97e-08	3596	HLA DR+ Natural Killer %Natural Killer	29.8423	0.00823498
rs9916257	G	T	0.1457	0.02506	6.72e-09	3596	HLA DR+ Natural Killer %Natural Killer	33.7843	0.00931266
rs115150472	C	T	2.619	0.5765	5.73e-06	3656	IgD+ CD24- B cell Absolute Count	20.6269	0.00561334
rs12197153	G	A	2.118	0.4501	2.63e-06	3656	IgD+ CD24- B cell Absolute Count	22.1308	0.00602012
rs12799241	G	A	0.132	0.02794	2.39e-06	3656	IgD+ CD24- B cell Absolute Count	22.3078	0.006068
rs141108367	G	A	1.503	0.3297	5.31e-06	3656	IgD+ CD24- B cell Absolute Count	20.7703	0.00565213
rs143397127	T	C	-0.4464	0.09885	6.51e-06	3656	IgD+ CD24- B cell Absolute Count	20.3825	0.00554719
rs150663332	C	T	-0.2005	0.04387	5.03e-06	3656	IgD+ CD24- B cell Absolute Count	20.8764	0.00568085
rs17056318	T	C	-0.2103	0.04553	3.99e-06	3656	IgD+ CD24- B cell Absolute Count	21.3229	0.00580163
rs189761842	C	T	0.7675	0.1702	6.72e-06	3656	IgD+ CD24- B cell Absolute Count	20.3236	0.00553124
rs190448231	T	G	0.3363	0.07548	8.65e-06	3656	IgD+ CD24- B cell Absolute Count	19.8405	0.00540048
rs2395904	T	G	-0.1335	0.0275	1.26e-06	3656	IgD+ CD24- B cell Absolute Count	23.5537	0.00640472
rs34764986	T	C	-0.2158	0.04786	6.7e-06	3656	IgD+ CD24- B cell Absolute Count	20.3198	0.00553023
rs34771848	C	T	-0.3693	0.08033	4.44e-06	3656	IgD+ CD24- B cell Absolute Count	21.1235	0.00574769
rs3811215	G	T	-0.1264	0.02685	2.6e-06	3656	IgD+ CD24- B cell Absolute Count	22.1497	0.00602525
rs701839	A	G	0.1269	0.02791	5.63e-06	3656	IgD+ CD24- B cell Absolute Count	20.6617	0.00562275
rs71615254	A	C	-0.2989	0.06147	1.21e-06	3656	IgD+ CD24- B cell Absolute Count	23.6313	0.00642569
rs73426855	T	C	-0.1616	0.03458	3.1e-06	3656	IgD+ CD24- B cell Absolute Count	21.8271	0.005938
rs75474045	G	A	0.4915	0.1086	6.25e-06	3656	IgD+ CD24- B cell Absolute Count	20.4715	0.00557128
rs76578043	G	A	0.3166	0.0697	5.74e-06	3656	IgD+ CD24- B cell Absolute Count	20.6214	0.00561185
rs77983244	G	A	-0.3049	0.06682	5.23e-06	3656	IgD+ CD24- B cell Absolute Count	20.8096	0.00566278
rs11217768	G	A	1.709	0.3783	6.44e-06	3405	CD25++ CD4+ T cell Absolute Count	20.3965	0.00595798
rs11697981	T	C	0.1763	0.03779	3.21e-06	3405	CD25++ CD4+ T cell Absolute Count	21.7518	0.00635136
rs117614870	C	T	0.6427	0.1433	7.48e-06	3405	CD25++ CD4+ T cell Absolute Count	20.1034	0.00587285
rs117676560	G	A	-0.3824	0.08605	9.09e-06	3405	CD25++ CD4+ T cell Absolute Count	19.7369	0.00576641
rs12145444	C	A	0.1666	0.03703	7.06e-06	3405	CD25++ CD4+ T cell Absolute Count	20.2296	0.00590951
rs137903114	T	C	-0.9764	0.2119	4.22e-06	3405	CD25++ CD4+ T cell Absolute Count	21.2197	0.00619693
rs140960913	C	T	0.3573	0.07789	4.66e-06	3405	CD25++ CD4+ T cell Absolute Count	21.0304	0.006142
rs142289362	G	A	0.4896	0.1007	1.23e-06	3405	CD25++ CD4+ T cell Absolute Count	23.6248	0.00689449
rs145600407	C	T	-0.4767	0.1041	4.82e-06	3405	CD25++ CD4+ T cell Absolute Count	20.9572	0.00612076
rs149951966	T	C	0.2152	0.04361	8.48e-07	3405	CD25++ CD4+ T cell Absolute Count	24.3364	0.00710069
rs150956240	A	G	0.6588	0.1379	1.84e-06	3405	CD25++ CD4+ T cell Absolute Count	22.8099	0.00665825
rs17717645	T	C	0.3864	0.08132	2.1e-06	3405	CD25++ CD4+ T cell Absolute Count	22.5644	0.00658707
rs188501834	G	A	-0.7243	0.1627	8.76e-06	3405	CD25++ CD4+ T cell Absolute Count	19.8065	0.00578661
rs188505795	G	T	0.2962	0.06616	7.79e-06	3405	CD25++ CD4+ T cell Absolute Count	20.032	0.00585212
rs2019002	G	A	0.1203	0.02597	3.72e-06	3405	CD25++ CD4+ T cell Absolute Count	21.4453	0.00626242
rs61839660	C	T	0.4625	0.05656	4.05e-16	3405	CD25++ CD4+ T cell Absolute Count	66.8266	0.0192594
rs7560118	C	T	-0.183	0.04135	9.98e-06	3405	CD25++ CD4+ T cell Absolute Count	19.5747	0.0057193
rs79596262	G	A	1.533	0.3431	8.13e-06	3405	CD25++ CD4+ T cell Absolute Count	19.9521	0.0058289
rs79749232	G	A	0.6264	0.1408	8.93e-06	3405	CD25++ CD4+ T cell Absolute Count	19.7808	0.00577915
rs9343914	C	T	-0.1647	0.03647	6.57e-06	3405	CD25++ CD4+ T cell Absolute Count	20.3826	0.00595395
rs11264885	A	G	-0.1468	0.02883	3.73e-07	3596	HLA DR+ Natural Killer %CD3- lymphocyte	25.9132	0.00715852
rs115227354	A	G	0.2581	0.05447	2.24e-06	3596	HLA DR+ Natural Killer %CD3- lymphocyte	22.4398	0.00620495
rs11595870	G	A	0.3054	0.06599	3.82e-06	3596	HLA DR+ Natural Killer %CD3- lymphocyte	21.4062	0.00592084
rs117338457	G	T	0.2779	0.06096	5.32e-06	3596	HLA DR+ Natural Killer %CD3- lymphocyte	20.7704	0.00574599
rs1317712	C	T	-0.1599	0.02991	9.6e-08	3596	HLA DR+ Natural Killer %CD3- lymphocyte	28.5642	0.00788509
rs144018284	C	T	-0.6247	0.1369	5.2e-06	3596	HLA DR+ Natural Killer %CD3- lymphocyte	20.8111	0.00575717
rs150102419	G	A	0.6357	0.135	2.6e-06	3596	HLA DR+ Natural Killer %CD3- lymphocyte	22.1613	0.00612841
rs1609454	A	G	-0.1188	0.02587	4.5e-06	3596	HLA DR+ Natural Killer %CD3- lymphocyte	21.0765	0.00583017
rs1862176	G	A	-0.1461	0.02698	6.5e-08	3596	HLA DR+ Natural Killer %CD3- lymphocyte	29.3072	0.00808853
rs28816203	G	A	0.1225	0.02549	1.61e-06	3596	HLA DR+ Natural Killer %CD3- lymphocyte	23.0829	0.00638164
rs3135080	A	G	-0.1168	0.02552	4.84e-06	3596	HLA DR+ Natural Killer %CD3- lymphocyte	20.9355	0.00579138
rs4076588	C	A	0.1116	0.02505	8.69e-06	3596	HLA DR+ Natural Killer %CD3- lymphocyte	19.8368	0.00548912
rs4684938	G	A	-0.2009	0.04435	6.08e-06	3596	HLA DR+ Natural Killer %CD3- lymphocyte	20.5084	0.0056739
rs61745530	G	T	-0.3596	0.0779	4.04e-06	3596	HLA DR+ Natural Killer %CD3- lymphocyte	21.2972	0.00589086
rs62028061	T	C	-0.1225	0.0259	2.35e-06	3596	HLA DR+ Natural Killer %CD3- lymphocyte	22.3579	0.00618244
rs71424967	C	T	0.7938	0.1746	5.61e-06	3596	HLA DR+ Natural Killer %CD3- lymphocyte	20.6582	0.00571511
rs71632979	A	G	-0.7124	0.02686	9.98e-142	3596	HLA DR+ Natural Killer %CD3- lymphocyte	703.063	0.163615
rs79676986	A	C	0.2654	0.05771	4.41e-06	3596	HLA DR+ Natural Killer %CD3- lymphocyte	21.1377	0.005847
rs11158220	G	A	-0.1644	0.03658	7.16e-06	3653	Granulocyte Absolute Count	20.1873	0.00549885
rs11265198	G	A	0.3966	0.08035	8.35e-07	3653	Granulocyte Absolute Count	24.3498	0.00662517
rs12450800	C	T	-0.1161	0.02615	9.35e-06	3653	Granulocyte Absolute Count	19.7008	0.00536703
rs12618511	T	C	-0.2653	0.05281	5.34e-07	3653	Granulocyte Absolute Count	25.2234	0.00686124
rs13383581	A	G	-0.3358	0.07558	9.11e-06	3653	Granulocyte Absolute Count	19.7292	0.00537474
rs1563320	T	C	-0.1142	0.0249	4.68e-06	3653	Granulocyte Absolute Count	21.023	0.00572519
rs17879224	G	A	-1.782	0.3933	6.05e-06	3653	Granulocyte Absolute Count	20.5177	0.00558836
rs185512917	C	T	-0.8628	0.1837	2.75e-06	3653	Granulocyte Absolute Count	22.0477	0.00600257
rs1890595	C	T	0.1203	0.0261	4.2e-06	3653	Granulocyte Absolute Count	21.2331	0.00578205
rs34599082	C	T	-0.3362	0.06657	4.61e-07	3653	Granulocyte Absolute Count	25.4918	0.00693373
rs35566998	G	A	-0.1259	0.02634	1.83e-06	3653	Granulocyte Absolute Count	22.834	0.00621531
rs4074900	T	G	0.1403	0.02995	2.89e-06	3653	Granulocyte Absolute Count	21.9323	0.00597133
rs481252	T	C	0.1104	0.02465	7.81e-06	3653	Granulocyte Absolute Count	20.0478	0.00546105
rs671160	C	T	-0.1888	0.03924	1.56e-06	3653	Granulocyte Absolute Count	23.1371	0.00629728
rs6757897	T	C	0.3326	0.07169	3.62e-06	3653	Granulocyte Absolute Count	21.5124	0.00585769
rs72762395	C	T	-0.3375	0.07374	4.87e-06	3653	Granulocyte Absolute Count	20.9365	0.00570175
rs75350000	G	A	-0.7378	0.1645	7.52e-06	3653	Granulocyte Absolute Count	20.1052	0.0054766
rs77650974	G	A	0.1262	0.02662	2.24e-06	3653	Granulocyte Absolute Count	22.4628	0.0061149
rs77799904	T	C	-0.251	0.05521	5.66e-06	3653	Granulocyte Absolute Count	20.6573	0.00562616
rs7805092	G	T	-0.1104	0.02497	9.97e-06	3653	Granulocyte Absolute Count	19.5372	0.00532272
rs78270456	C	A	0.1811	0.04026	7.08e-06	3653	Granulocyte Absolute Count	20.2233	0.00550859
rs9851753	C	T	-0.6398	0.141	5.86e-06	3653	Granulocyte Absolute Count	20.5784	0.00560479
rs9852120	C	T	0.1222	0.02498	1.05e-06	3653	Granulocyte Absolute Count	23.9177	0.00650837
rs1116294	C	T	-0.1155	0.02597	9.02e-06	3669	Granulocyte %leukocyte	19.7689	0.00536213
rs112405229	G	A	0.2941	0.06403	4.52e-06	3669	Granulocyte %leukocyte	21.0856	0.00571722
rs114188428	T	C	1.127	0.2511	7.36e-06	3669	Granulocyte %leukocyte	20.1334	0.00546045
rs11805388	A	G	0.3798	0.08535	8.83e-06	3669	Granulocyte %leukocyte	19.7909	0.00536806
rs137979325	C	T	0.6232	0.1403	9.15e-06	3669	Granulocyte %leukocyte	19.7198	0.00534888
rs145016200	C	T	-0.2627	0.057	4.18e-06	3669	Granulocyte %leukocyte	21.2292	0.00575593
rs184624056	A	G	0.5425	0.1224	9.64e-06	3669	Granulocyte %leukocyte	19.6336	0.00532562
rs2434066	A	C	0.1711	0.03596	2.05e-06	3669	Granulocyte %leukocyte	22.6268	0.00613255
rs265772	T	G	-0.2011	0.04534	9.45e-06	3669	Granulocyte %leukocyte	19.6618	0.00533324
rs2837766	C	T	-0.1218	0.02721	7.87e-06	3669	Granulocyte %leukocyte	20.0263	0.00543156
rs34599082	C	T	-0.3169	0.06647	1.93e-06	3669	Granulocyte %leukocyte	22.7173	0.00615692
rs4588497	C	T	-0.1646	0.03635	6.1e-06	3669	Granulocyte %leukocyte	20.4934	0.00555754
rs481252	T	C	0.1239	0.02455	4.72e-07	3669	Granulocyte %leukocyte	25.4567	0.00689426
rs61415458	T	C	0.1527	0.03421	8.36e-06	3669	Granulocyte %leukocyte	19.9129	0.00540098
rs6701133	T	C	0.124	0.0248	6e-07	3669	Granulocyte %leukocyte	24.9864	0.00676773
rs7219272	G	A	-0.1211	0.02611	3.62e-06	3669	Granulocyte %leukocyte	21.5	0.00582892
rs74674596	C	T	0.5351	0.1204	9e-06	3669	Granulocyte %leukocyte	19.7415	0.00535473
rs77650974	G	A	0.1512	0.0265	1.25e-08	3669	Granulocyte %leukocyte	32.5368	0.00879483
rs78277075	A	G	-0.3658	0.08002	5e-06	3669	Granulocyte %leukocyte	20.8859	0.00566338
rs79040043	G	A	0.4302	0.09601	7.66e-06	3669	Granulocyte %leukocyte	20.0665	0.0054424
rs79855296	C	T	-0.1175	0.02528	3.44e-06	3669	Granulocyte %leukocyte	21.5916	0.00585362
rs8177701	A	G	-0.2032	0.0449	6.2e-06	3669	Granulocyte %leukocyte	20.47	0.00555123
rs893978	C	T	-0.3807	0.08129	2.94e-06	3669	Granulocyte %leukocyte	21.9207	0.00594231
rs9729039	C	T	-0.9599	0.2143	7.74e-06	3669	Granulocyte %leukocyte	20.0526	0.00543865
rs10174322	A	G	-0.1507	0.028	7.75e-08	3440	CD28- CD4-CD8- T cell %CD4-CD8- T cell	28.9506	0.00835046
rs11128263	G	T	-0.117	0.02521	3.58e-06	3440	CD28- CD4-CD8- T cell %CD4-CD8- T cell	21.5265	0.00622238
rs114170505	T	C	-0.1978	0.04098	1.44e-06	3440	CD28- CD4-CD8- T cell %CD4-CD8- T cell	23.2839	0.00672696
rs11930576	T	C	-0.1344	0.02812	1.83e-06	3440	CD28- CD4-CD8- T cell %CD4-CD8- T cell	22.8305	0.00659683
rs12770129	C	T	-0.2774	0.0608	5.21e-06	3440	CD28- CD4-CD8- T cell %CD4-CD8- T cell	20.8043	0.00601488
rs143066848	A	G	-0.293	0.06073	1.47e-06	3440	CD28- CD4-CD8- T cell %CD4-CD8- T cell	23.2636	0.00672112
rs149302210	A	G	0.4529	0.1018	8.96e-06	3440	CD28- CD4-CD8- T cell %CD4-CD8- T cell	19.7814	0.00572083
rs1675243	A	G	-0.1144	0.0252	5.77e-06	3440	CD28- CD4-CD8- T cell %CD4-CD8- T cell	20.5967	0.00595523
rs17187533	G	A	-0.8439	0.1827	4.02e-06	3440	CD28- CD4-CD8- T cell %CD4-CD8- T cell	21.3232	0.00616398
rs1875167	T	C	-0.151	0.02983	4.38e-07	3440	CD28- CD4-CD8- T cell %CD4-CD8- T cell	25.6091	0.00739377
rs35409720	G	A	-0.1292	0.02879	7.44e-06	3440	CD28- CD4-CD8- T cell %CD4-CD8- T cell	20.1275	0.00582034
rs4391487	T	C	0.1939	0.04275	5.91e-06	3440	CD28- CD4-CD8- T cell %CD4-CD8- T cell	20.5604	0.00594478
rs4796089	T	C	-0.2435	0.0371	6.13e-11	3440	CD28- CD4-CD8- T cell %CD4-CD8- T cell	43.0524	0.0123676
rs56009006	C	T	0.249	0.05127	1.24e-06	3440	CD28- CD4-CD8- T cell %CD4-CD8- T cell	23.5733	0.00680998
rs59211785	C	T	-0.2028	0.04254	1.95e-06	3440	CD28- CD4-CD8- T cell %CD4-CD8- T cell	22.7137	0.00656331
rs61894112	C	A	-0.1613	0.03532	5.14e-06	3440	CD28- CD4-CD8- T cell %CD4-CD8- T cell	20.8437	0.0060262
rs66989520	C	T	0.1749	0.03644	1.66e-06	3440	CD28- CD4-CD8- T cell %CD4-CD8- T cell	23.0234	0.00665221
rs6734907	C	T	0.115	0.02569	7.83e-06	3440	CD28- CD4-CD8- T cell %CD4-CD8- T cell	20.027	0.00579144
rs7134223	T	G	0.3233	0.07177	6.84e-06	3440	CD28- CD4-CD8- T cell %CD4-CD8- T cell	20.2802	0.00586425
rs74593262	C	T	-1.711	0.3553	1.53e-06	3440	CD28- CD4-CD8- T cell %CD4-CD8- T cell	23.177	0.00669627
rs75187775	C	T	0.2422	0.05429	8.4e-06	3440	CD28- CD4-CD8- T cell %CD4-CD8- T cell	19.891	0.00575234
rs78409217	A	G	-0.2463	0.0544	6.16e-06	3440	CD28- CD4-CD8- T cell %CD4-CD8- T cell	20.487	0.00592369
rs78686313	C	T	-0.7959	0.1729	4.3e-06	3440	CD28- CD4-CD8- T cell %CD4-CD8- T cell	21.1775	0.00612212
rs79012126	C	T	0.171	0.03804	7.19e-06	3440	CD28- CD4-CD8- T cell %CD4-CD8- T cell	20.1957	0.00583995
rs79967252	G	A	-0.4428	0.09912	8.19e-06	3440	CD28- CD4-CD8- T cell %CD4-CD8- T cell	19.9453	0.00576796
rs9914549	A	G	-0.1505	0.03264	4.12e-06	3440	CD28- CD4-CD8- T cell %CD4-CD8- T cell	21.2481	0.0061424
rs10757255	G	A	-0.1252	0.02547	9.26e-07	3408	CD28- CD4-CD8- T cell Absolute Count	24.1488	0.00704017
rs11128263	G	T	-0.1189	0.02529	2.68e-06	3408	CD28- CD4-CD8- T cell Absolute Count	22.0908	0.00644405
rs111891110	T	C	0.3012	0.06677	6.67e-06	3408	CD28- CD4-CD8- T cell Absolute Count	20.3373	0.00593557
rs115364254	T	G	0.1657	0.03605	4.44e-06	3408	CD28- CD4-CD8- T cell Absolute Count	21.1144	0.006161
rs115953192	A	G	-0.279	0.06079	4.6e-06	3408	CD28- CD4-CD8- T cell Absolute Count	21.0518	0.00614283
rs11856833	A	C	-0.1432	0.03166	6.31e-06	3408	CD28- CD4-CD8- T cell Absolute Count	20.446	0.00596713
rs137931178	A	G	-0.201	0.03778	1.1e-07	3408	CD28- CD4-CD8- T cell Absolute Count	28.2887	0.00823714
rs138517625	A	G	0.7811	0.1763	9.71e-06	3408	CD28- CD4-CD8- T cell Absolute Count	19.618	0.00572684
rs139249541	A	G	0.3832	0.0742	2.55e-07	3408	CD28- CD4-CD8- T cell Absolute Count	26.6556	0.0077653
rs139755840	A	G	0.3202	0.07045	5.69e-06	3408	CD28- CD4-CD8- T cell Absolute Count	20.6455	0.00602499
rs140413577	G	A	0.3004	0.06729	8.31e-06	3408	CD28- CD4-CD8- T cell Absolute Count	19.9179	0.00581389
rs140444563	T	G	0.1893	0.04112	4.31e-06	3408	CD28- CD4-CD8- T cell Absolute Count	21.1807	0.00618021
rs140542258	C	T	0.5394	0.1197	6.85e-06	3408	CD28- CD4-CD8- T cell Absolute Count	20.2945	0.00592317
rs1580183	A	G	-0.2241	0.04717	2.11e-06	3408	CD28- CD4-CD8- T cell Absolute Count	22.5578	0.00657939
rs2388191	T	C	-0.125	0.02552	1.01e-06	3408	CD28- CD4-CD8- T cell Absolute Count	23.9775	0.00699057
rs35765554	G	A	0.1361	0.03056	8.71e-06	3408	CD28- CD4-CD8- T cell Absolute Count	19.8223	0.00578615
rs36037322	T	C	-0.1518	0.02968	3.35e-07	3408	CD28- CD4-CD8- T cell Absolute Count	26.1433	0.0076172
rs4298345	G	A	0.3453	0.07738	8.35e-06	3408	CD28- CD4-CD8- T cell Absolute Count	19.9013	0.00580906
rs61894112	C	A	-0.1585	0.03555	8.51e-06	3408	CD28- CD4-CD8- T cell Absolute Count	19.8666	0.00579901
rs66989520	C	T	0.1787	0.0367	1.18e-06	3408	CD28- CD4-CD8- T cell Absolute Count	23.6953	0.00690886
rs6710361	G	A	0.1921	0.03166	1.45e-09	3408	CD28- CD4-CD8- T cell Absolute Count	36.7941	0.0106873
rs74593262	C	T	-1.712	0.3537	1.35e-06	3408	CD28- CD4-CD8- T cell Absolute Count	23.4144	0.00682751
rs76549873	T	C	-0.5102	0.1146	8.83e-06	3408	CD28- CD4-CD8- T cell Absolute Count	19.8087	0.00578221
rs7789422	A	C	-0.1141	0.02572	9.38e-06	3408	CD28- CD4-CD8- T cell Absolute Count	19.6686	0.00574155
rs7869045	G	A	-0.2717	0.06011	6.4e-06	3408	CD28- CD4-CD8- T cell Absolute Count	20.4188	0.00595923
rs79251210	G	A	0.3063	0.06674	4.6e-06	3408	CD28- CD4-CD8- T cell Absolute Count	21.0507	0.00614251
rs9896155	A	G	0.1857	0.02686	5.64e-12	3408	CD28- CD4-CD8- T cell Absolute Count	47.7702	0.0138313
rs10987993	T	C	0.1649	0.03676	7.5e-06	3440	CD28+ CD4-CD8- T cell %T cell	20.1112	0.00581566
rs111486611	C	T	0.2476	0.05594	9.92e-06	3440	CD28+ CD4-CD8- T cell %T cell	19.5796	0.0056628
rs112667234	T	C	0.1872	0.04068	4.35e-06	3440	CD28+ CD4-CD8- T cell %T cell	21.164	0.00611823
rs115661735	C	T	0.2228	0.04978	7.84e-06	3440	CD28+ CD4-CD8- T cell %T cell	20.0202	0.00578949
rs144380153	G	A	1.008	0.2276	9.81e-06	3440	CD28+ CD4-CD8- T cell %T cell	19.6031	0.00566955
rs147994116	T	C	1.736	0.3581	1.31e-06	3440	CD28+ CD4-CD8- T cell %T cell	23.4876	0.0067854
rs190300559	A	G	0.2427	0.05388	6.86e-06	3440	CD28+ CD4-CD8- T cell %T cell	20.2783	0.0058637
rs1979672	A	G	0.1142	0.02566	8.81e-06	3440	CD28+ CD4-CD8- T cell %T cell	19.7955	0.00572489
rs3111416	G	A	0.1109	0.023	1.51e-06	3440	CD28+ CD4-CD8- T cell %T cell	23.2357	0.00671311
rs34546581	G	A	0.1659	0.02878	8.92e-09	3440	CD28+ CD4-CD8- T cell %T cell	33.2092	0.00956705
rs34825674	A	G	-0.1115	0.02519	9.92e-06	3440	CD28+ CD4-CD8- T cell %T cell	19.5813	0.00566329
rs35662273	G	A	0.1352	0.02927	3.99e-06	3440	CD28+ CD4-CD8- T cell %T cell	21.3233	0.00616402
rs4077189	G	A	-0.2413	0.05271	4.87e-06	3440	CD28+ CD4-CD8- T cell %T cell	20.9448	0.00605525
rs55781756	G	A	0.1531	0.03082	7.08e-07	3440	CD28+ CD4-CD8- T cell %T cell	24.6622	0.00712234
rs57672161	C	T	0.2487	0.04888	3.83e-07	3440	CD28+ CD4-CD8- T cell %T cell	25.8724	0.00746921
rs72740660	T	C	0.1977	0.04392	6.97e-06	3440	CD28+ CD4-CD8- T cell %T cell	20.2505	0.00585571
rs73503175	T	C	0.4675	0.09941	2.66e-06	3440	CD28+ CD4-CD8- T cell %T cell	22.103	0.00638795
rs75581458	T	G	-0.2002	0.04419	6.07e-06	3440	CD28+ CD4-CD8- T cell %T cell	20.5129	0.00593114
rs75679242	C	A	-0.1806	0.03532	3.37e-07	3440	CD28+ CD4-CD8- T cell %T cell	26.1301	0.00754306
rs79892959	G	A	0.3131	0.06747	3.61e-06	3440	CD28+ CD4-CD8- T cell %T cell	21.5225	0.00622123
rs941206	A	C	-0.204	0.04447	4.65e-06	3440	CD28+ CD4-CD8- T cell %T cell	21.0317	0.00608022
rs9880099	A	G	-0.2734	0.05945	4.39e-06	3440	CD28+ CD4-CD8- T cell %T cell	21.1369	0.00611045
rs10174322	A	G	0.1507	0.028	7.75e-08	3440	CD28+ CD4-CD8- T cell %CD4-CD8- T cell	28.9506	0.00835046
rs11128263	G	T	0.117	0.02521	3.58e-06	3440	CD28+ CD4-CD8- T cell %CD4-CD8- T cell	21.5265	0.00622238
rs114170505	T	C	0.1978	0.04098	1.44e-06	3440	CD28+ CD4-CD8- T cell %CD4-CD8- T cell	23.2839	0.00672696
rs11930576	T	C	0.1344	0.02812	1.83e-06	3440	CD28+ CD4-CD8- T cell %CD4-CD8- T cell	22.8305	0.00659683
rs12770129	C	T	0.2774	0.0608	5.21e-06	3440	CD28+ CD4-CD8- T cell %CD4-CD8- T cell	20.8043	0.00601488
rs143066848	A	G	0.293	0.06073	1.47e-06	3440	CD28+ CD4-CD8- T cell %CD4-CD8- T cell	23.2636	0.00672112
rs149302210	A	G	-0.4529	0.1018	8.96e-06	3440	CD28+ CD4-CD8- T cell %CD4-CD8- T cell	19.7814	0.00572083
rs1675243	A	G	0.1144	0.0252	5.77e-06	3440	CD28+ CD4-CD8- T cell %CD4-CD8- T cell	20.5967	0.00595523
rs17187533	G	A	0.8439	0.1827	4.02e-06	3440	CD28+ CD4-CD8- T cell %CD4-CD8- T cell	21.3232	0.00616398
rs1875167	T	C	0.151	0.02983	4.38e-07	3440	CD28+ CD4-CD8- T cell %CD4-CD8- T cell	25.6091	0.00739377
rs35409720	G	A	0.1292	0.02879	7.44e-06	3440	CD28+ CD4-CD8- T cell %CD4-CD8- T cell	20.1275	0.00582034
rs4391487	T	C	-0.1939	0.04275	5.91e-06	3440	CD28+ CD4-CD8- T cell %CD4-CD8- T cell	20.5604	0.00594478
rs4796089	T	C	0.2435	0.0371	6.13e-11	3440	CD28+ CD4-CD8- T cell %CD4-CD8- T cell	43.0524	0.0123676
rs56009006	C	T	-0.249	0.05127	1.24e-06	3440	CD28+ CD4-CD8- T cell %CD4-CD8- T cell	23.5733	0.00680998
rs59211785	C	T	0.2028	0.04254	1.95e-06	3440	CD28+ CD4-CD8- T cell %CD4-CD8- T cell	22.7137	0.00656331
rs61894112	C	A	0.1613	0.03532	5.14e-06	3440	CD28+ CD4-CD8- T cell %CD4-CD8- T cell	20.8437	0.0060262
rs66989520	C	T	-0.1749	0.03644	1.66e-06	3440	CD28+ CD4-CD8- T cell %CD4-CD8- T cell	23.0234	0.00665221
rs6734907	C	T	-0.115	0.02569	7.83e-06	3440	CD28+ CD4-CD8- T cell %CD4-CD8- T cell	20.027	0.00579144
rs7134223	T	G	-0.3233	0.07177	6.84e-06	3440	CD28+ CD4-CD8- T cell %CD4-CD8- T cell	20.2802	0.00586425
rs74593262	C	T	1.711	0.3553	1.53e-06	3440	CD28+ CD4-CD8- T cell %CD4-CD8- T cell	23.177	0.00669627
rs75187775	C	T	-0.2422	0.05429	8.4e-06	3440	CD28+ CD4-CD8- T cell %CD4-CD8- T cell	19.891	0.00575234
rs78409217	A	G	0.2463	0.0544	6.16e-06	3440	CD28+ CD4-CD8- T cell %CD4-CD8- T cell	20.487	0.00592369
rs78686313	C	T	0.7959	0.1729	4.3e-06	3440	CD28+ CD4-CD8- T cell %CD4-CD8- T cell	21.1775	0.00612212
rs79012126	C	T	-0.171	0.03804	7.19e-06	3440	CD28+ CD4-CD8- T cell %CD4-CD8- T cell	20.1957	0.00583995
rs79967252	G	A	0.4428	0.09912	8.19e-06	3440	CD28+ CD4-CD8- T cell %CD4-CD8- T cell	19.9453	0.00576796
rs9914549	A	G	0.1505	0.03264	4.12e-06	3440	CD28+ CD4-CD8- T cell %CD4-CD8- T cell	21.2481	0.0061424
rs35723887	T	C	0.1447	0.02756	1.62e-07	3408	CD28+ CD4-CD8- T cell Absolute Count	27.5501	0.0080238
rs3757248	C	T	0.1053	0.02247	2.87e-06	3408	CD28+ CD4-CD8- T cell Absolute Count	21.948	0.00640267
rs57672161	C	T	0.2194	0.04651	2.49e-06	3408	CD28+ CD4-CD8- T cell Absolute Count	22.2395	0.00648716
rs6044409	G	A	0.9508	0.1849	2.88e-07	3408	CD28+ CD4-CD8- T cell Absolute Count	26.4271	0.00769925
rs7128994	A	G	-0.09693	0.02177	8.73e-06	3408	CD28+ CD4-CD8- T cell Absolute Count	19.8127	0.00578337
rs7214041	C	T	0.1884	0.04071	3.84e-06	3408	CD28+ CD4-CD8- T cell Absolute Count	21.4045	0.0062451
rs73829619	T	G	0.809	0.1758	4.35e-06	3408	CD28+ CD4-CD8- T cell Absolute Count	21.1643	0.00617546
rs77008070	A	G	0.2819	0.06336	8.89e-06	3408	CD28+ CD4-CD8- T cell Absolute Count	19.7836	0.00577491
rs77805826	C	T	-0.1677	0.03709	6.32e-06	3408	CD28+ CD4-CD8- T cell Absolute Count	20.4314	0.00596287
rs10762791	T	G	-0.1294	0.02464	1.6e-07	3440	CD39+ CD4+ T cell %T cell	27.5635	0.00795354
rs10882701	A	C	-0.3969	0.02378	3.17e-60	3440	CD39+ CD4+ T cell %T cell	278.411	0.0749139
rs11187462	A	C	0.1862	0.028	3.38e-11	3440	CD39+ CD4+ T cell %T cell	44.1968	0.0126922
rs114309505	A	G	0.2137	0.04557	2.84e-06	3440	CD39+ CD4+ T cell %T cell	21.9785	0.00635221
rs11598645	T	C	-0.6106	0.1299	2.69e-06	3440	CD39+ CD4+ T cell %T cell	22.0822	0.00638199
rs11658050	C	T	0.1439	0.0292	8.71e-07	3440	CD39+ CD4+ T cell %T cell	24.2719	0.00701039
rs118130438	C	T	0.1314	0.02886	5.49e-06	3440	CD39+ CD4+ T cell %T cell	20.7179	0.00599005
rs12573061	C	T	0.3523	0.04875	6.09e-13	3440	CD39+ CD4+ T cell %T cell	52.1943	0.0149546
rs12587599	C	T	-0.191	0.03906	1.05e-06	3440	CD39+ CD4+ T cell %T cell	23.8973	0.00690296
rs144700141	G	A	-0.5461	0.1215	7.18e-06	3440	CD39+ CD4+ T cell %T cell	20.1901	0.00583835
rs144764562	G	A	-2.568	0.5373	1.82e-06	3440	CD39+ CD4+ T cell %T cell	22.8299	0.00659665
rs145557266	A	G	0.6746	0.08639	7.61e-15	3440	CD39+ CD4+ T cell %T cell	60.9415	0.0174171
rs150156752	T	C	-1.767	0.3957	8.29e-06	3440	CD39+ CD4+ T cell %T cell	19.9291	0.00576331
rs1999472	A	G	0.1112	0.0246	6.37e-06	3440	CD39+ CD4+ T cell %T cell	20.4215	0.00590485
rs2286306	A	G	0.1288	0.02841	6e-06	3440	CD39+ CD4+ T cell %T cell	20.5417	0.00593941
rs2907958	G	A	-0.1194	0.02484	1.6e-06	3440	CD39+ CD4+ T cell %T cell	23.0915	0.00667175
rs34664008	A	C	-0.1588	0.03489	5.51e-06	3440	CD39+ CD4+ T cell %T cell	20.7036	0.00598595
rs55992940	T	C	-0.1396	0.03057	5.16e-06	3440	CD39+ CD4+ T cell %T cell	20.8414	0.00602555
rs62421103	G	T	0.2206	0.04771	3.91e-06	3440	CD39+ CD4+ T cell %T cell	21.3668	0.00617651
rs6569455	A	G	-0.1429	0.02896	8.36e-07	3440	CD39+ CD4+ T cell %T cell	24.3341	0.00702823
rs6686124	A	G	0.1713	0.03736	4.73e-06	3440	CD39+ CD4+ T cell %T cell	21.0111	0.0060743
rs74346764	G	A	-0.5776	0.1222	2.38e-06	3440	CD39+ CD4+ T cell %T cell	22.3285	0.00645271
rs75420474	T	C	-2.978	0.6354	2.89e-06	3440	CD39+ CD4+ T cell %T cell	21.9534	0.00634501
rs7753111	A	G	0.118	0.02615	6.6e-06	3440	CD39+ CD4+ T cell %T cell	20.3502	0.00588436
rs79049066	T	C	-0.4645	0.05484	3.6e-17	3440	CD39+ CD4+ T cell %T cell	71.7008	0.0204293
rs10184974	C	T	-0.1215	0.0264	4.32e-06	3440	CD39+ CD4+ T cell %CD4+ T cell	21.1686	0.00611956
rs10762791	T	G	-0.1212	0.02466	9.26e-07	3440	CD39+ CD4+ T cell %CD4+ T cell	24.1416	0.00697303
rs10882701	A	C	-0.3997	0.02377	4.54e-61	3440	CD39+ CD4+ T cell %CD4+ T cell	282.59	0.0759531
rs111852518	C	T	0.3526	0.04841	4.01e-13	3440	CD39+ CD4+ T cell %CD4+ T cell	53.0203	0.0151876
rs11658050	C	T	0.1408	0.02921	1.5e-06	3440	CD39+ CD4+ T cell %CD4+ T cell	23.2215	0.00670904
rs117200502	C	T	0.3358	0.03902	1.13e-17	3440	CD39+ CD4+ T cell %CD4+ T cell	74.0175	0.0210755
rs117667220	G	A	0.2216	0.04974	8.67e-06	3440	CD39+ CD4+ T cell %CD4+ T cell	19.837	0.00573682
rs12587599	C	T	-0.1824	0.03908	3.17e-06	3440	CD39+ CD4+ T cell %CD4+ T cell	21.7715	0.00629275
rs12648210	A	G	-0.4495	0.1002	7.56e-06	3440	CD39+ CD4+ T cell %CD4+ T cell	20.1127	0.0058161
rs139405606	T	C	-0.7852	0.1745	7.01e-06	3440	CD39+ CD4+ T cell %CD4+ T cell	20.2356	0.00585144
rs142629161	A	C	-2.79	0.586	2.01e-06	3440	CD39+ CD4+ T cell %CD4+ T cell	22.6548	0.0065464
rs145557266	A	G	0.7452	0.08624	8.4e-18	3440	CD39+ CD4+ T cell %CD4+ T cell	74.6235	0.0212444
rs150066446	G	A	-0.4657	0.09374	7.09e-07	3440	CD39+ CD4+ T cell %CD4+ T cell	24.6666	0.0071236
rs184287492	G	A	-0.465	0.1034	7.14e-06	3440	CD39+ CD4+ T cell %CD4+ T cell	20.2121	0.00584468
rs2008368	T	C	0.1695	0.03382	5.63e-07	3440	CD39+ CD4+ T cell %CD4+ T cell	25.1038	0.00724893
rs2907958	G	A	-0.1147	0.02485	4.11e-06	3440	CD39+ CD4+ T cell %CD4+ T cell	21.2922	0.00615509
rs34664008	A	C	-0.1726	0.03487	7.85e-07	3440	CD39+ CD4+ T cell %CD4+ T cell	24.4864	0.00707192
rs74346764	G	A	-0.6221	0.1222	3.73e-07	3440	CD39+ CD4+ T cell %CD4+ T cell	25.9015	0.00747756
rs74773804	G	A	-0.3868	0.08578	6.72e-06	3440	CD39+ CD4+ T cell %CD4+ T cell	20.3211	0.00587602
rs78390127	T	C	0.4688	0.1057	9.41e-06	3440	CD39+ CD4+ T cell %CD4+ T cell	19.6595	0.00568579
rs11221698	C	T	-0.1372	0.03098	9.74e-06	3437	CD25++ CD4+ T cell %CD4+ T cell	19.6016	0.00567407
rs11603619	G	A	-0.476	0.09847	1.4e-06	3437	CD25++ CD4+ T cell %CD4+ T cell	23.3536	0.0067528
rs116928928	T	C	-0.2994	0.06501	4.27e-06	3437	CD25++ CD4+ T cell %CD4+ T cell	21.1978	0.00613327
rs117614870	C	T	0.64	0.1411	5.95e-06	3437	CD25++ CD4+ T cell %CD4+ T cell	20.5614	0.00595024
rs117760133	G	T	0.2309	0.04892	2.45e-06	3437	CD25++ CD4+ T cell %CD4+ T cell	22.265	0.00644005
rs12819777	G	A	0.1524	0.03338	5.17e-06	3437	CD25++ CD4+ T cell %CD4+ T cell	20.8326	0.00602826
rs140655813	C	T	-0.4015	0.08763	4.77e-06	3437	CD25++ CD4+ T cell %CD4+ T cell	20.9803	0.00607074
rs181741769	T	C	1.191	0.2683	9.38e-06	3437	CD25++ CD4+ T cell %CD4+ T cell	19.6938	0.00570059
rs2448157	T	C	-0.1867	0.04212	9.57e-06	3437	CD25++ CD4+ T cell %CD4+ T cell	19.6363	0.00568404
rs3732449	C	T	0.1359	0.03044	8.25e-06	3437	CD25++ CD4+ T cell %CD4+ T cell	19.9203	0.00576579
rs419099	A	G	-0.1308	0.02947	9.37e-06	3437	CD25++ CD4+ T cell %CD4+ T cell	19.688	0.00569893
rs537403506	G	A	0.3244	0.07235	7.57e-06	3437	CD25++ CD4+ T cell %CD4+ T cell	20.0924	0.0058153
rs56107686	C	T	0.2161	0.04799	6.95e-06	3437	CD25++ CD4+ T cell %CD4+ T cell	20.2654	0.00586508
rs61839660	C	T	0.592	0.05509	1.64e-26	3437	CD25++ CD4+ T cell %CD4+ T cell	115.41	0.0325062
rs7305147	T	C	0.176	0.03798	3.74e-06	3437	CD25++ CD4+ T cell %CD4+ T cell	21.4616	0.00620913
rs74553250	C	T	-0.1839	0.04016	4.85e-06	3437	CD25++ CD4+ T cell %CD4+ T cell	20.9567	0.00606394
rs7831142	G	A	0.1491	0.03212	3.6e-06	3437	CD25++ CD4+ T cell %CD4+ T cell	21.5353	0.00623032
rs79327855	C	T	-1.787	0.3883	4.3e-06	3437	CD25++ CD4+ T cell %CD4+ T cell	21.1671	0.00612445
rs9268791	T	C	-0.157	0.03295	1.95e-06	3437	CD25++ CD4+ T cell %CD4+ T cell	22.6901	0.0065622
rs10505439	C	T	-0.1852	0.04175	9.38e-06	3657	CD24+ CD27+ B cell %B cell	19.6667	0.00535197
rs10743163	G	A	-0.1205	0.02541	2.21e-06	3657	CD24+ CD27+ B cell %B cell	22.4764	0.00611191
rs112294465	C	A	1.249	0.2784	7.44e-06	3657	CD24+ CD27+ B cell %B cell	20.1163	0.00547366
rs115405874	A	G	0.9325	0.2017	3.93e-06	3657	CD24+ CD27+ B cell %B cell	21.3623	0.00581072
rs116844769	G	A	0.2482	0.05078	1.06e-06	3657	CD24+ CD27+ B cell %B cell	23.877	0.00649031
rs117004076	A	G	0.4553	0.1022	8.56e-06	3657	CD24+ CD27+ B cell %B cell	19.8361	0.00539781
rs145208372	G	A	-0.56	0.1234	5.91e-06	3657	CD24+ CD27+ B cell %B cell	20.583	0.00559992
rs145442262	G	A	-0.2083	0.04276	1.15e-06	3657	CD24+ CD27+ B cell %B cell	23.7173	0.00644717
rs265612	C	T	0.1143	0.02575	9.3e-06	3657	CD24+ CD27+ B cell %B cell	19.6925	0.00535895
rs35698683	A	G	-0.293	0.05931	8.18e-07	3657	CD24+ CD27+ B cell %B cell	24.3917	0.00662927
rs45608038	A	G	0.3527	0.0624	1.71e-08	3657	CD24+ CD27+ B cell %B cell	31.9304	0.00866043
rs4658141	T	C	-0.1269	0.02592	1.01e-06	3657	CD24+ CD27+ B cell %B cell	23.9561	0.00651165
rs55710170	G	A	-0.1708	0.03788	6.71e-06	3657	CD24+ CD27+ B cell %B cell	20.3197	0.0055287
rs62233948	C	T	-0.737	0.1643	7.48e-06	3657	CD24+ CD27+ B cell %B cell	20.1105	0.00547207
rs681014	T	C	0.9614	0.207	3.52e-06	3657	CD24+ CD27+ B cell %B cell	21.5591	0.00586393
rs7221794	G	A	-0.1563	0.03395	4.3e-06	3657	CD24+ CD27+ B cell %B cell	21.1837	0.0057624
rs72758947	A	G	-0.2365	0.05101	3.67e-06	3657	CD24+ CD27+ B cell %B cell	21.4839	0.00584361
rs72844588	G	A	0.2066	0.04322	1.83e-06	3657	CD24+ CD27+ B cell %B cell	22.8378	0.00620956
rs72944931	A	G	0.4657	0.1052	9.92e-06	3657	CD24+ CD27+ B cell %B cell	19.5859	0.0053301
rs7412746	C	T	-0.1301	0.02547	3.41e-07	3657	CD24+ CD27+ B cell %B cell	26.0771	0.00708409
rs75766272	C	T	-0.4865	0.08656	2.05e-08	3657	CD24+ CD27+ B cell %B cell	31.5714	0.00856389
rs76477280	A	G	0.4892	0.08811	3.03e-08	3657	CD24+ CD27+ B cell %B cell	30.8095	0.00835896
rs9492229	T	C	0.2715	0.06115	9.28e-06	3657	CD24+ CD27+ B cell %B cell	19.7019	0.00536151
rs10800381	C	T	0.1562	0.03519	9.37e-06	3408	CD39+ CD4+ T cell Absolute Count	19.691	0.00574805
rs10882324	C	T	-0.1207	0.0264	4.96e-06	3408	CD39+ CD4+ T cell Absolute Count	20.8906	0.00609609
rs10882701	A	C	-0.4118	0.0249	3.85e-59	3408	CD39+ CD4+ T cell Absolute Count	273.35	0.074293
rs111852518	C	T	0.3945	0.05061	8.48e-15	3408	CD39+ CD4+ T cell Absolute Count	60.7248	0.0175165
rs113087753	G	A	0.2554	0.05646	6.27e-06	3408	CD39+ CD4+ T cell Absolute Count	20.4506	0.00596844
rs11598645	T	C	-0.6196	0.1364	5.74e-06	3408	CD39+ CD4+ T cell Absolute Count	20.6224	0.00601829
rs11718018	T	C	-0.1208	0.02589	3.18e-06	3408	CD39+ CD4+ T cell Absolute Count	21.7578	0.00634753
rs139577399	T	C	-0.3243	0.06424	4.69e-07	3408	CD39+ CD4+ T cell Absolute Count	25.4699	0.00742246
rs140503524	C	T	-1.428	0.3074	3.49e-06	3408	CD39+ CD4+ T cell Absolute Count	21.5672	0.00629228
rs145557266	A	G	0.7936	0.09034	2.46e-18	3408	CD39+ CD4+ T cell Absolute Count	77.1238	0.0221421
rs149951966	T	C	0.1983	0.04337	4.99e-06	3408	CD39+ CD4+ T cell Absolute Count	20.8935	0.00609693
rs150066446	G	A	-0.4783	0.09852	1.26e-06	3408	CD39+ CD4+ T cell Absolute Count	23.5558	0.00686846
rs17091864	A	G	0.5315	0.1201	9.88e-06	3408	CD39+ CD4+ T cell Absolute Count	19.5734	0.0057139
rs191265355	T	C	1.095	0.2467	9.4e-06	3408	CD39+ CD4+ T cell Absolute Count	19.6895	0.00574761
rs2252311	G	T	0.1789	0.03737	1.77e-06	3408	CD39+ CD4+ T cell Absolute Count	22.9044	0.00667981
rs35163827	A	G	-0.3193	0.07127	7.73e-06	3408	CD39+ CD4+ T cell Absolute Count	20.0599	0.0058551
rs4321083	G	A	0.156	0.03139	7.08e-07	3408	CD39+ CD4+ T cell Absolute Count	24.6838	0.007195
rs57516532	C	T	0.3142	0.06993	7.26e-06	3408	CD39+ CD4+ T cell Absolute Count	20.1758	0.00588872
rs59143200	T	C	-0.1181	0.02594	5.48e-06	3408	CD39+ CD4+ T cell Absolute Count	20.716	0.00604542
rs62421103	G	T	0.2313	0.05047	4.73e-06	3408	CD39+ CD4+ T cell Absolute Count	20.9908	0.00612515
rs72968495	T	C	2.034	0.4463	5.37e-06	3408	CD39+ CD4+ T cell Absolute Count	20.7584	0.00605773
rs74791100	T	C	0.5331	0.1169	5.28e-06	3408	CD39+ CD4+ T cell Absolute Count	20.7842	0.00606522
rs78027772	G	A	0.2207	0.04649	2.15e-06	3408	CD39+ CD4+ T cell Absolute Count	22.5232	0.00656937
rs79049066	T	C	-0.5199	0.0574	2.19e-19	3408	CD39+ CD4+ T cell Absolute Count	81.99	0.0235064
rs7906911	G	T	0.2516	0.05477	4.5e-06	3408	CD39+ CD4+ T cell Absolute Count	21.0902	0.00615397
rs8076447	G	A	0.1441	0.02906	7.48e-07	3408	CD39+ CD4+ T cell Absolute Count	24.5743	0.00716333
rs111748563	A	G	0.2598	0.05827	8.52e-06	3440	CD28- CD8dim T cell %T cell	19.8672	0.00574549
rs113075410	A	G	0.3121	0.05748	6.06e-08	3440	CD28- CD8dim T cell %T cell	29.4647	0.00849747
rs115125396	T	C	0.2263	0.04608	9.51e-07	3440	CD28- CD8dim T cell %T cell	24.1041	0.00696228
rs11544989	A	G	0.1185	0.02626	6.61e-06	3440	CD28- CD8dim T cell %T cell	20.3514	0.00588472
[truncated: 12,458 more rows]

## Sheet: Supplement Table 2
Supplement Table 2. Characteristics of the genetic instrumental variables used in 18 immunophenotypes
SNP	other_allele.exposure	effect_allele.exposure	beta.exposure	se.exposure	pval.exposure	samplesize.exposure	exposure	F statistic	R2
rs10244964	G	T	-1.445	0.3106	3.43e-06	3596	HLA DR+ T cell%lymphocyte	21.6317	0.00598283
rs10787670	T	C	-0.1905	0.04198	5.86e-06	3596	HLA DR+ T cell%lymphocyte	20.5809	0.00569384
rs10788105	G	A	0.2367	0.04839	1.04e-06	3596	HLA DR+ T cell%lymphocyte	23.9135	0.00660976
rs1084560	A	G	-0.134	0.02371	1.73e-08	3596	HLA DR+ T cell%lymphocyte	31.9231	0.00880413
rs11070458	C	T	-0.5481	0.1239	9.97e-06	3596	HLA DR+ T cell%lymphocyte	19.5585	0.00541253
rs116797692	G	A	-0.3197	0.07188	8.95e-06	3596	HLA DR+ T cell%lymphocyte	19.7709	0.005471
rs117014352	C	T	-1.013	0.2098	1.44e-06	3596	HLA DR+ T cell%lymphocyte	23.3006	0.00644142
rs140410174	C	T	-0.2422	0.04942	9.96e-07	3596	HLA DR+ T cell%lymphocyte	24.005	0.00663486
rs146309290	T	C	-0.7231	0.1551	3.23e-06	3596	HLA DR+ T cell%lymphocyte	21.7236	0.00600809
rs148323639	G	A	0.3005	0.06583	5.16e-06	3596	HLA DR+ T cell%lymphocyte	20.8257	0.00576119
rs1863851	G	A	0.4087	0.09222	9.62e-06	3596	HLA DR+ T cell%lymphocyte	19.6299	0.00543218
rs2414178	T	C	-0.1296	0.02865	6.31e-06	3596	HLA DR+ T cell%lymphocyte	20.4512	0.00565818
rs3087456	G	A	-0.4689	0.02616	7.09e-69	3596	HLA DR+ T cell%lymphocyte	321.102	0.0820163
rs506151	C	T	-0.3761	0.08368	7.19e-06	3596	HLA DR+ T cell%lymphocyte	20.1893	0.00558613
rs542160	C	T	-0.1084	0.02338	3.7e-06	3596	HLA DR+ T cell%lymphocyte	21.4846	0.00594239
rs7032773	C	T	-0.1552	0.0249	5.15e-10	3596	HLA DR+ T cell%lymphocyte	38.8278	0.010688
rs72777888	G	A	0.341	0.06708	3.9e-07	3596	HLA DR+ T cell%lymphocyte	25.8274	0.00713499
rs72779785	A	G	-0.1718	0.03137	4.64e-08	3596	HLA DR+ T cell%lymphocyte	29.9761	0.00827162
rs7294683	A	G	0.106	0.02377	8.39e-06	3596	HLA DR+ T cell%lymphocyte	19.8752	0.00549969
rs73030989	C	T	1.618	0.3497	3.85e-06	3596	HLA DR+ T cell%lymphocyte	21.3956	0.00591791
rs76997602	A	G	-0.3991	0.08606	3.66e-06	3596	HLA DR+ T cell%lymphocyte	21.4941	0.005945
rs79178843	G	A	0.5526	0.1188	3.4e-06	3596	HLA DR+ T cell%lymphocyte	21.6246	0.00598086
rs9526689	G	A	0.5032	0.1093	4.3e-06	3596	HLA DR+ T cell%lymphocyte	21.1836	0.00585961
rs11124150	A	G	-0.1185	0.02525	2.8e-06	3668	CD4-CD8- Natural Killer T %lymphocyte	22.0129	0.00596877
rs113413210	T	C	0.2508	0.0559	7.49e-06	3668	CD4-CD8- Natural Killer T %lymphocyte	20.1185	0.0054579
rs115536607	C	T	0.3576	0.05416	4.64e-11	3668	CD4-CD8- Natural Killer T %lymphocyte	43.5713	0.0117457
rs11579742	C	T	-0.5199	0.1161	7.79e-06	3668	CD4-CD8- Natural Killer T %lymphocyte	20.0419	0.00543723
rs117147408	A	G	0.675	0.07557	6.5e-19	3668	CD4-CD8- Natural Killer T %lymphocyte	79.7392	0.021288
rs11759822	G	T	0.1268	0.02693	2.58e-06	3668	CD4-CD8- Natural Killer T %lymphocyte	22.1579	0.00600785
rs12792298	C	T	-0.3106	0.06573	2.38e-06	3668	CD4-CD8- Natural Killer T %lymphocyte	22.3172	0.00605077
rs140444563	T	G	0.1844	0.03996	4.09e-06	3668	CD4-CD8- Natural Killer T %lymphocyte	21.2831	0.00577202
rs149977848	G	A	0.4432	0.09784	6.09e-06	3668	CD4-CD8- Natural Killer T %lymphocyte	20.5083	0.00556307
rs188455143	G	A	0.3487	0.07386	2.43e-06	3668	CD4-CD8- Natural Killer T %lymphocyte	22.2766	0.00603983
rs192734627	G	A	0.306	0.06449	2.17e-06	3668	CD4-CD8- Natural Killer T %lymphocyte	22.502	0.00610058
rs265772	T	G	-0.2013	0.04454	6.39e-06	3668	CD4-CD8- Natural Killer T %lymphocyte	20.415	0.00553791
rs61925057	C	T	-0.4258	0.09245	4.25e-06	3668	CD4-CD8- Natural Killer T %lymphocyte	21.2012	0.00574995
rs6785704	A	G	-0.1997	0.04189	1.93e-06	3668	CD4-CD8- Natural Killer T %lymphocyte	22.7143	0.00615777
rs72784218	G	A	0.2338	0.0512	5.11e-06	3668	CD4-CD8- Natural Killer T %lymphocyte	20.8407	0.00565272
rs73191859	A	G	0.1799	0.03903	4.16e-06	3668	CD4-CD8- Natural Killer T %lymphocyte	21.2338	0.00575874
rs7569868	C	T	0.2197	0.03135	2.88e-12	3668	CD4-CD8- Natural Killer T %lymphocyte	49.0849	0.0132123
rs76158038	T	C	-0.2382	0.05267	6.28e-06	3668	CD4-CD8- Natural Killer T %lymphocyte	20.4418	0.00554514
rs76333352	C	T	0.6311	0.1397	6.46e-06	3668	CD4-CD8- Natural Killer T %lymphocyte	20.397	0.00553305
rs77738700	G	A	-0.3774	0.03905	7.85e-22	3668	CD4-CD8- Natural Killer T %lymphocyte	93.3523	0.024832
rs79251210	G	A	0.5505	0.06465	2.39e-17	3668	CD4-CD8- Natural Killer T %lymphocyte	72.4671	0.0193842
rs8054431	G	T	0.1122	0.0252	8.7e-06	3668	CD4-CD8- Natural Killer T %lymphocyte	19.8129	0.00537545
rs9509337	G	A	-0.1273	0.02859	8.73e-06	3668	CD4-CD8- Natural Killer T %lymphocyte	19.8149	0.00537599
rs9916629	T	C	0.1378	0.02431	1.54e-08	3668	CD4-CD8- Natural Killer T %lymphocyte	32.1138	0.00868383
rs9983338	C	T	-0.416	0.09034	4.27e-06	3668	CD4-CD8- Natural Killer T %lymphocyte	21.1929	0.0057477
rs11637587	C	T	-0.8617	0.1945	9.71e-06	3653	Natural Killer Absolute Count	19.6171	0.00534436
rs1257331	C	T	0.1177	0.02464	1.83e-06	3653	Natural Killer Absolute Count	22.8052	0.00620751
rs13287806	G	A	0.1362	0.03024	6.86e-06	3653	Natural Killer Absolute Count	20.2746	0.0055225
rs150434441	A	G	-0.1121	0.0246	5.3e-06	3653	Natural Killer Absolute Count	20.7541	0.00565236
rs17824379	A	G	-1.189	0.2213	8.29e-08	3653	Natural Killer Absolute Count	28.8511	0.0078403
rs183053322	C	T	-0.3926	0.06648	3.83e-09	3653	Natural Killer Absolute Count	34.8563	0.00945676
rs184712	C	T	-0.188	0.03968	2.23e-06	3653	Natural Killer Absolute Count	22.4354	0.00610748
rs2922076	G	A	0.1148	0.02548	6.86e-06	3653	Natural Killer Absolute Count	20.2884	0.00552623
rs3789102	C	T	0.1119	0.02443	4.76e-06	3653	Natural Killer Absolute Count	20.9689	0.00571053
rs541558027	A	C	0.7623	0.1655	4.23e-06	3653	Natural Killer Absolute Count	21.204	0.00577419
rs55971447	C	T	-0.1314	0.02854	4.29e-06	3653	Natural Killer Absolute Count	21.1858	0.00576926
rs59536859	A	G	-0.1659	0.03479	1.92e-06	3653	Natural Killer Absolute Count	22.7272	0.00618642
rs74938505	C	T	-0.3533	0.07486	2.46e-06	3653	Natural Killer Absolute Count	22.2613	0.00606035
rs7736582	C	T	0.1787	0.0392	5.3e-06	3653	Natural Killer Absolute Count	20.7701	0.00565671
rs78664638	T	C	0.6198	0.1347	4.32e-06	3653	Natural Killer Absolute Count	21.1607	0.00576247
rs9916257	G	T	-0.2005	0.02398	8.82e-17	3653	Natural Killer Absolute Count	69.8703	0.0187779
rs10752607	G	A	0.1478	0.02969	6.76e-07	3658	CD19 on IgD- CD38+ B cell	24.768	0.00672903
rs112139040	T	G	-1.043	0.2358	9.93e-06	3658	CD19 on IgD- CD38+ B cell	19.5544	0.00532011
rs117647889	C	T	0.8414	0.1853	5.79e-06	3658	CD19 on IgD- CD38+ B cell	20.6071	0.00560492
rs139775632	A	G	-0.651	0.1299	5.63e-07	3658	CD19 on IgD- CD38+ B cell	25.1019	0.00681912
rs147763919	A	C	0.2034	0.04414	4.19e-06	3658	CD19 on IgD- CD38+ B cell	21.2227	0.00577138
rs1871013	G	A	-0.1526	0.03413	7.95e-06	3658	CD19 on IgD- CD38+ B cell	19.9802	0.00543533
rs215237	G	A	-0.126	0.02775	5.79e-06	3658	CD19 on IgD- CD38+ B cell	20.6052	0.00560442
rs254079	A	G	0.125	0.02664	2.8e-06	3658	CD19 on IgD- CD38+ B cell	22.0046	0.00598276
rs4968431	T	G	0.1321	0.0266	7.13e-07	3658	CD19 on IgD- CD38+ B cell	24.6493	0.006697
rs6805030	C	A	-0.3596	0.07811	4.3e-06	3658	CD19 on IgD- CD38+ B cell	21.1831	0.00576067
rs72816772	C	T	0.225	0.04921	4.98e-06	3658	CD19 on IgD- CD38+ B cell	20.894	0.0056825
rs72998964	G	A	-0.2264	0.04986	5.77e-06	3658	CD19 on IgD- CD38+ B cell	20.6068	0.00560484
rs73718149	T	C	-0.4537	0.102	8.87e-06	3658	CD19 on IgD- CD38+ B cell	19.7742	0.00537961
rs75117490	A	G	0.1912	0.04025	2.11e-06	3658	CD19 on IgD- CD38+ B cell	22.5531	0.00613097
rs79290247	C	T	-0.5608	0.1247	7.05e-06	3658	CD19 on IgD- CD38+ B cell	20.2137	0.00549851
rs10501383	C	T	-0.255	0.04098	5.41e-10	3657	CD20 on IgD- CD38- B cell	38.6989	0.010477
rs11751198	G	A	0.1995	0.03634	4.32e-08	3657	CD20 on IgD- CD38- B cell	30.1216	0.00817385
rs12200643	G	A	-0.7166	0.1417	4.48e-07	3657	CD20 on IgD- CD38- B cell	25.5609	0.00694484
rs140120241	G	A	0.1647	0.03617	5.47e-06	3657	CD20 on IgD- CD38- B cell	20.723	0.0056378
rs148703002	T	C	0.4416	0.0978	6.53e-06	3657	CD20 on IgD- CD38- B cell	20.3771	0.00554423
rs179206	C	T	-0.2276	0.04734	1.59e-06	3657	CD20 on IgD- CD38- B cell	23.102	0.00628097
rs183569210	G	A	-0.8397	0.1773	2.27e-06	3657	CD20 on IgD- CD38- B cell	22.4178	0.00609607
rs1838178	A	G	0.1167	0.02541	4.52e-06	3657	CD20 on IgD- CD38- B cell	21.0812	0.00573469
rs2578469	G	A	-0.1169	0.02589	6.51e-06	3657	CD20 on IgD- CD38- B cell	20.3764	0.00554403
rs2868177	A	G	0.1152	0.02499	4.14e-06	3657	CD20 on IgD- CD38- B cell	21.239	0.00577738
rs3123557	C	T	-0.1247	0.02465	4.44e-07	3657	CD20 on IgD- CD38- B cell	25.5777	0.00694937
rs4716010	G	A	0.1717	0.03209	9.32e-08	3657	CD20 on IgD- CD38- B cell	28.613	0.00776765
rs55809481	T	C	-0.2424	0.02879	5.44e-17	3657	CD20 on IgD- CD38- B cell	70.8507	0.019016
rs57271503	G	A	-0.158	0.03108	3.91e-07	3657	CD20 on IgD- CD38- B cell	25.8294	0.00701728
rs6120395	A	G	-0.1201	0.02578	3.29e-06	3657	CD20 on IgD- CD38- B cell	21.6912	0.00589964
rs61731791	C	T	0.2328	0.04226	3.86e-08	3657	CD20 on IgD- CD38- B cell	30.3298	0.00822987
rs61886501	C	T	0.6844	0.1508	5.84e-06	3657	CD20 on IgD- CD38- B cell	20.5864	0.00560084
rs62194499	G	A	0.2192	0.04834	5.98e-06	3657	CD20 on IgD- CD38- B cell	20.5509	0.00559124
rs7179991	A	G	-0.2259	0.04792	2.52e-06	3657	CD20 on IgD- CD38- B cell	22.2106	0.00604008
rs75071948	T	G	0.2659	0.05907	6.98e-06	3657	CD20 on IgD- CD38- B cell	20.2519	0.00551034
rs7608595	T	C	0.1231	0.0261	2.47e-06	3657	CD20 on IgD- CD38- B cell	22.233	0.00604611
rs78368496	A	G	0.3921	0.08806	8.75e-06	3657	CD20 on IgD- CD38- B cell	19.8152	0.00539217
rs849532	A	G	0.3227	0.06129	1.49e-07	3657	CD20 on IgD- CD38- B cell	27.7065	0.0075234
rs9461562	A	G	0.2489	0.0499	6.42e-07	3657	CD20 on IgD- CD38- B cell	24.8663	0.00675739
rs9842470	C	T	0.1459	0.03288	9.41e-06	3657	CD20 on IgD- CD38- B cell	19.6793	0.00535538
rs11760108	G	T	-0.3239	0.0712	5.91e-06	1247	HVEM on naive CD4+ T cell	20.6616	0.0163248
rs117618257	C	A	-0.2272	0.04419	3.16e-07	1247	HVEM on naive CD4+ T cell	26.392	0.0207583
rs13434241	T	G	-0.3581	0.08051	9.45e-06	1247	HVEM on naive CD4+ T cell	19.752	0.0156173
rs144299393	G	A	-2.657	0.5926	8.04e-06	1247	HVEM on naive CD4+ T cell	20.0707	0.0158653
rs150797289	A	G	-0.4223	0.09508	9.73e-06	1247	HVEM on naive CD4+ T cell	19.6955	0.0155733
rs17532418	C	A	1.343	0.2883	3.54e-06	1247	HVEM on naive CD4+ T cell	21.6653	0.0171042
rs2234161	C	T	0.2484	0.03809	1.02e-10	1247	HVEM on naive CD4+ T cell	42.4604	0.03298
rs28904611	A	G	0.4353	0.09415	4.17e-06	1247	HVEM on naive CD4+ T cell	21.3422	0.0168534
rs536853	A	G	0.268	0.05435	9.25e-07	1247	HVEM on naive CD4+ T cell	24.2758	0.0191257
rs56091264	A	G	-0.1944	0.04053	1.8e-06	1247	HVEM on naive CD4+ T cell	22.969	0.0181148
rs62076816	A	G	0.2364	0.05245	7.22e-06	1247	HVEM on naive CD4+ T cell	20.2818	0.0160295
rs72730570	A	C	-0.3957	0.08393	2.69e-06	1247	HVEM on naive CD4+ T cell	22.1922	0.0175129
rs7385030	C	T	-0.227	0.05059	7.9e-06	1247	HVEM on naive CD4+ T cell	20.1014	0.0158891
rs7430694	C	T	-0.4144	0.09321	9.53e-06	1247	HVEM on naive CD4+ T cell	19.7341	0.0156034
rs7896504	C	T	-0.2666	0.0518	3.07e-07	1247	HVEM on naive CD4+ T cell	26.4462	0.0208001
rs10803923	T	C	0.2179	0.0479	5.73e-06	1858	CD66b++ myeloid cell Absolute Count	20.6717	0.0110151
rs11114486	C	A	0.1498	0.03364	8.96e-06	1858	CD66b++ myeloid cell Absolute Count	19.8081	0.0105598
rs111580523	A	C	0.8998	0.1985	6.16e-06	1858	CD66b++ myeloid cell Absolute Count	20.5259	0.0109383
rs11218704	A	G	0.3401	0.06951	1.08e-06	1858	CD66b++ myeloid cell Absolute Count	23.9139	0.0127208
rs116795543	G	A	1.002	0.2232	7.65e-06	1858	CD66b++ myeloid cell Absolute Count	20.1316	0.0107304
rs12239179	C	T	-0.1795	0.04043	9.54e-06	1858	CD66b++ myeloid cell Absolute Count	19.6904	0.0104977
rs148676149	G	A	-0.2997	0.06761	9.83e-06	1858	CD66b++ myeloid cell Absolute Count	19.6284	0.0104649
rs16979810	C	T	0.2566	0.05753	8.65e-06	1858	CD66b++ myeloid cell Absolute Count	19.8727	0.0105938
rs1899009	A	G	0.2036	0.04022	4.56e-07	1858	CD66b++ myeloid cell Absolute Count	25.5979	0.0136043
rs2070901	G	T	0.189	0.03644	2.37e-07	1858	CD66b++ myeloid cell Absolute Count	26.8719	0.0142718
rs2911266	C	T	-0.1502	0.0337	8.83e-06	1858	CD66b++ myeloid cell Absolute Count	19.8432	0.0105783
rs71536865	G	T	-0.3584	0.07966	7.25e-06	1858	CD66b++ myeloid cell Absolute Count	20.2203	0.0107771
rs72845259	G	A	1.74	0.3719	3.1e-06	1858	CD66b++ myeloid cell Absolute Count	21.8665	0.0116443
rs78384212	C	T	0.3421	0.07511	5.59e-06	1858	CD66b++ myeloid cell Absolute Count	20.7225	0.0110419
rs117417480	G	T	0.8056	0.1475	5.32e-08	1857	Basophil %CD33dim HLA DR- CD66b-	29.798	0.0158096
rs13237906	G	T	0.157	0.03299	2.1e-06	1857	Basophil %CD33dim HLA DR- CD66b-	22.6239	0.0120492
rs16872136	A	G	-0.4165	0.08693	1.79e-06	1857	Basophil %CD33dim HLA DR- CD66b-	22.931	0.0122108
rs1924240	T	C	-0.1764	0.03978	9.82e-06	1857	Basophil %CD33dim HLA DR- CD66b-	19.6426	0.0104781
rs208569	T	C	0.2465	0.05341	4.2e-06	1857	Basophil %CD33dim HLA DR- CD66b-	21.2775	0.0113403
rs2392579	A	G	-0.2561	0.05598	5.06e-06	1857	Basophil %CD33dim HLA DR- CD66b-	20.9067	0.0111448
rs3865444	C	A	-0.5183	0.03788	1.14e-40	1857	Basophil %CD33dim HLA DR- CD66b-	187.014	0.0915832
rs422720	C	A	0.1584	0.03343	2.31e-06	1857	Basophil %CD33dim HLA DR- CD66b-	22.4269	0.0119456
rs4499342	C	T	0.2541	0.04602	3.85e-08	1857	Basophil %CD33dim HLA DR- CD66b-	30.4543	0.0161522
rs4679209	C	T	0.1576	0.03285	1.74e-06	1857	Basophil %CD33dim HLA DR- CD66b-	22.9918	0.0122428
rs49195	C	T	0.1791	0.03849	3.49e-06	1857	Basophil %CD33dim HLA DR- CD66b-	21.6285	0.0115252
rs61823496	T	G	-0.1914	0.04301	9.09e-06	1857	Basophil %CD33dim HLA DR- CD66b-	19.7823	0.0105518
rs62024809	C	T	-0.7626	0.171	8.69e-06	1857	Basophil %CD33dim HLA DR- CD66b-	19.8671	0.0105965
rs72714455	C	T	0.1482	0.03274	6.39e-06	1857	Basophil %CD33dim HLA DR- CD66b-	20.4678	0.0109134
rs73163591	C	A	0.3003	0.06721	8.37e-06	1857	Basophil %CD33dim HLA DR- CD66b-	19.9423	0.0106362
rs7351079	A	G	-0.2756	0.03696	1.37e-13	1857	Basophil %CD33dim HLA DR- CD66b-	55.5426	0.0290717
rs75165408	G	A	0.2733	0.06145	9.18e-06	1857	Basophil %CD33dim HLA DR- CD66b-	19.7591	0.0105395
rs112157475	C	T	-0.2428	0.04919	8.42e-07	2850	FSC-A on granulocyte	24.3466	0.00847622
rs113949273	G	A	0.6333	0.1358	3.26e-06	2850	FSC-A on granulocyte	21.7327	0.00757309
rs11697729	A	G	-0.1925	0.0428	7.19e-06	2850	FSC-A on granulocyte	20.2148	0.00704786
rs12675298	G	A	-0.4215	0.086	1e-06	2850	FSC-A on granulocyte	24.0045	0.00835811
rs13411484	C	T	-0.1406	0.03091	5.65e-06	2850	FSC-A on granulocyte	20.6761	0.00720753
rs139475037	G	A	0.6378	0.1302	1.02e-06	2850	FSC-A on granulocyte	23.9796	0.00834951
rs142088303	T	C	0.4918	0.1102	8.39e-06	2850	FSC-A on granulocyte	19.9026	0.00693976
rs144666992	T	C	-0.9631	0.2129	6.31e-06	2850	FSC-A on granulocyte	20.4497	0.00712918
rs153514	T	C	-0.1346	0.02909	3.89e-06	2850	FSC-A on granulocyte	21.3943	0.00745603
rs2306975	C	T	0.1346	0.02969	6.03e-06	2850	FSC-A on granulocyte	20.5383	0.00715985
rs3179891	G	A	0.1538	0.0295	1.99e-07	2850	FSC-A on granulocyte	27.1621	0.00944716
rs421685	C	A	-0.7403	0.165	7.56e-06	2850	FSC-A on granulocyte	20.1161	0.00701368
rs445	C	T	0.4475	0.03413	3.45e-38	2850	FSC-A on granulocyte	171.794	0.0568894
rs58985199	G	A	0.2063	0.0448	4.32e-06	2850	FSC-A on granulocyte	21.1903	0.00738547
rs72615608	G	T	0.1988	0.0434	4.8e-06	2850	FSC-A on granulocyte	20.9676	0.00730841
rs72821867	G	A	0.2377	0.05358	9.53e-06	2850	FSC-A on granulocyte	19.6675	0.00685834
rs73016817	G	A	0.1823	0.04026	6.21e-06	2850	FSC-A on granulocyte	20.489	0.00714279
rs80177268	A	G	0.558	0.1096	3.75e-07	2850	FSC-A on granulocyte	25.9025	0.00901302
rs915125	C	T	0.1264	0.02803	6.78e-06	2850	FSC-A on granulocyte	20.3209	0.0070846
rs11074932	T	C	-0.1459	0.02913	5.83e-07	2971	FSC-A on HLA DR+ Natural Killer	25.069	0.00837289
rs113248693	A	G	-0.7673	0.1636	2.84e-06	2971	FSC-A on HLA DR+ Natural Killer	21.9822	0.0073495
rs117063850	G	A	1.455	0.3285	9.75e-06	2971	FSC-A on HLA DR+ Natural Killer	19.6048	0.00655986
rs118133760	T	C	-0.1973	0.04374	6.68e-06	2971	FSC-A on HLA DR+ Natural Killer	20.3331	0.00680189
rs12524004	T	C	-0.4128	0.08943	4.08e-06	2971	FSC-A on HLA DR+ Natural Killer	21.2922	0.00712044
rs13416971	A	C	-0.2073	0.04598	6.76e-06	2971	FSC-A on HLA DR+ Natural Killer	20.3127	0.00679512
rs139392177	A	C	-0.7	0.1572	8.8e-06	2971	FSC-A on HLA DR+ Natural Killer	19.8152	0.00662979
rs141070453	A	G	-0.3895	0.08268	2.58e-06	2971	FSC-A on HLA DR+ Natural Killer	22.178	0.00741446
rs143012283	C	T	-0.6004	0.125	1.64e-06	2971	FSC-A on HLA DR+ Natural Killer	23.0552	0.00770547
rs147173736	A	G	-0.2822	0.06329	8.52e-06	2971	FSC-A on HLA DR+ Natural Killer	19.8679	0.00664729
rs35620656	G	T	0.1427	0.02969	1.62e-06	2971	FSC-A on HLA DR+ Natural Killer	23.0853	0.00771545
rs56365312	G	A	1.091	0.2424	6.94e-06	2971	FSC-A on HLA DR+ Natural Killer	20.2438	0.00677221
rs61896987	A	C	-0.5537	0.1202	4.25e-06	2971	FSC-A on HLA DR+ Natural Killer	21.2055	0.00709164
rs71632979	A	G	-0.5493	0.03044	3.58e-69	2971	FSC-A on HLA DR+ Natural Killer	325.415	0.0987778
rs72710789	C	T	0.198	0.04382	6.44e-06	2971	FSC-A on HLA DR+ Natural Killer	20.403	0.0068251
rs78518201	C	T	-0.5437	0.1141	1.96e-06	2971	FSC-A on HLA DR+ Natural Killer	22.6911	0.0075847
rs111929038	C	T	1.257	0.2692	3.16e-06	3629	CD40 on CD14+ CD16- monocyte	21.7912	0.00597217
rs112876754	A	G	0.3229	0.06611	1.08e-06	3629	CD40 on CD14+ CD16- monocyte	23.8431	0.00653084
rs116203109	G	A	-0.3052	0.06544	3.21e-06	3629	CD40 on CD14+ CD16- monocyte	21.7392	0.005958
rs117295081	A	G	0.5503	0.09653	1.29e-08	3629	CD40 on CD14+ CD16- monocyte	32.4814	0.00887596
rs117608122	T	C	-0.4893	0.09742	5.36e-07	3629	CD40 on CD14+ CD16- monocyte	25.2124	0.00690333
rs118170720	C	T	0.2558	0.05698	7.35e-06	3629	CD40 on CD14+ CD16- monocyte	20.1427	0.00552286
rs144545136	G	A	1.108	0.2425	5.04e-06	3629	CD40 on CD14+ CD16- monocyte	20.8649	0.00571976
rs149990497	A	G	-0.5676	0.1252	6.01e-06	3629	CD40 on CD14+ CD16- monocyte	20.5417	0.00563166
rs1801274	A	G	0.4371	0.02569	1.62e-62	3629	CD40 on CD14+ CD16- monocyte	289.33	0.0738779
rs188101908	G	A	0.6977	0.1576	9.85e-06	3629	CD40 on CD14+ CD16- monocyte	19.5878	0.00537154
rs3780804	T	G	0.1725	0.03802	5.89e-06	3629	CD40 on CD14+ CD16- monocyte	20.5738	0.00564041
rs3813611	G	A	0.1429	0.02637	6.44e-08	3629	CD40 on CD14+ CD16- monocyte	29.3498	0.00802707
rs57041960	A	C	-0.1646	0.03251	4.35e-07	3629	CD40 on CD14+ CD16- monocyte	25.6204	0.00701426
rs60629714	T	C	0.1864	0.03172	4.55e-09	3629	CD40 on CD14+ CD16- monocyte	34.5133	0.00942596
rs6713465	C	A	0.1433	0.02671	8.55e-08	3629	CD40 on CD14+ CD16- monocyte	28.7677	0.00786913
rs76949305	T	C	-0.1893	0.0414	4.97e-06	3629	CD40 on CD14+ CD16- monocyte	20.8959	0.00572821
rs77869433	G	A	0.3055	0.06593	3.72e-06	3629	CD40 on CD14+ CD16- monocyte	21.4594	0.00588176
rs78012242	G	T	-1.746	0.3486	5.78e-07	3629	CD40 on CD14+ CD16- monocyte	25.0723	0.00686523
rs9954245	T	C	-0.1453	0.03209	6.15e-06	3629	CD40 on CD14+ CD16- monocyte	20.4905	0.0056177
rs10071982	A	G	-0.1153	0.02494	3.92e-06	3618	CD14 on CD14+ CD16+ monocyte	21.3612	0.00587272
rs117306778	G	T	-0.2604	0.05719	5.46e-06	3618	CD14 on CD14+ CD16+ monocyte	20.7206	0.0056976
rs12262055	C	T	-0.1408	0.03132	7.12e-06	3618	CD14 on CD14+ CD16+ monocyte	20.1986	0.00555487
rs12593041	C	T	0.1733	0.03657	2.23e-06	3618	CD14 on CD14+ CD16+ monocyte	22.4444	0.00616867
rs13043397	C	T	0.1236	0.0267	3.82e-06	3618	CD14 on CD14+ CD16+ monocyte	21.4178	0.00588818
rs13248932	T	C	0.1727	0.03761	4.55e-06	3618	CD14 on CD14+ CD16+ monocyte	21.0736	0.0057941
rs17111403	C	T	-0.237	0.05339	9.34e-06	3618	CD14 on CD14+ CD16+ monocyte	19.6941	0.00541688
rs2569177	G	T	0.1645	0.02658	6.78e-10	3618	CD14 on CD14+ CD16+ monocyte	38.2809	0.0104756
rs26894	T	C	-0.1154	0.02491	3.77e-06	3618	CD14 on CD14+ CD16+ monocyte	21.4498	0.00589694
rs4291738	G	T	0.2134	0.04407	1.35e-06	3618	CD14 on CD14+ CD16+ monocyte	23.4349	0.00643915
rs61922057	C	T	-0.1893	0.04005	2.36e-06	3618	CD14 on CD14+ CD16+ monocyte	22.3283	0.00613697
rs62037895	A	G	-0.1502	0.03389	9.62e-06	3618	CD14 on CD14+ CD16+ monocyte	19.6316	0.00539979
rs6671847	G	A	0.1769	0.02681	4.7e-11	3618	CD14 on CD14+ CD16+ monocyte	43.5133	0.0118905
rs71586370	T	C	-0.7623	0.1631	3.06e-06	3618	CD14 on CD14+ CD16+ monocyte	21.8325	0.00600152
rs10130058	G	A	-0.1793	0.0389	4.21e-06	3582	CX3CR1 on CD14- CD16+ monocyte	21.2334	0.00589614
rs1024619	T	C	-0.1191	0.02688	9.71e-06	3582	CX3CR1 on CD14- CD16+ monocyte	19.6211	0.00545087
rs10779294	A	C	0.1255	0.02838	9.99e-06	3582	CX3CR1 on CD14- CD16+ monocyte	19.5443	0.00542966
rs1208168	A	C	0.8599	0.1915	7.33e-06	3582	CX3CR1 on CD14- CD16+ monocyte	20.1519	0.00559751
rs145135505	T	C	-0.2254	0.04869	3.79e-06	3582	CX3CR1 on CD14- CD16+ monocyte	21.4183	0.00594719
rs149100	T	G	-0.121	0.02458	8.87e-07	3582	CX3CR1 on CD14- CD16+ monocyte	24.2195	0.00671975
rs1801274	A	G	-0.2388	0.02599	6.57e-20	3582	CX3CR1 on CD14- CD16+ monocyte	84.375	0.0230257
rs2292701	G	A	-0.2432	0.05468	8.95e-06	3582	CX3CR1 on CD14- CD16+ monocyte	19.771	0.00549228
rs58215329	C	T	0.1903	0.03826	6.86e-07	3582	CX3CR1 on CD14- CD16+ monocyte	24.7255	0.00685919
rs6754954	G	A	-0.1236	0.02695	4.65e-06	3582	CX3CR1 on CD14- CD16+ monocyte	21.0221	0.00583782
rs76913544	G	A	-0.2479	0.05537	7.84e-06	3582	CX3CR1 on CD14- CD16+ monocyte	20.0337	0.00556487
rs9867963	C	T	-0.1289	0.02858	6.66e-06	3582	CX3CR1 on CD14- CD16+ monocyte	20.3301	0.00564672
rs9877538	C	A	-0.1766	0.03298	9.19e-08	3582	CX3CR1 on CD14- CD16+ monocyte	28.6574	0.00794131
rs113763504	G	A	-0.6472	0.1447	8.04e-06	3427	Naive CD4+ T cell %CD4+ T cell	19.9934	0.00580361
rs11579717	G	A	0.8342	0.1723	1.33e-06	3427	Naive CD4+ T cell %CD4+ T cell	23.427	0.00679353
rs11652705	A	G	-0.1384	0.03087	7.64e-06	3427	Naive CD4+ T cell %CD4+ T cell	20.0884	0.00583103
rs117262034	G	T	0.3785	0.08375	6.39e-06	3427	Naive CD4+ T cell %CD4+ T cell	20.4131	0.00592471
rs12121018	G	A	0.141	0.03063	4.31e-06	3427	Naive CD4+ T cell %CD4+ T cell	21.1783	0.00614544
rs12712610	A	G	0.1457	0.02548	1.18e-08	3427	Naive CD4+ T cell %CD4+ T cell	32.6788	0.00945109
rs146180953	C	T	0.1185	0.02637	7.3e-06	3427	Naive CD4+ T cell %CD4+ T cell	20.1819	0.00585802
rs146329634	C	T	-0.3196	0.06393	6.03e-07	3427	Naive CD4+ T cell %CD4+ T cell	24.9776	0.00723993
rs146620586	G	T	1.495	0.2604	1.01e-08	3427	Naive CD4+ T cell %CD4+ T cell	32.9418	0.00952641
rs148031710	T	C	-0.2454	0.05086	1.45e-06	3427	Naive CD4+ T cell %CD4+ T cell	23.2671	0.00674749
rs1849779	C	T	0.1091	0.02393	5.25e-06	3427	Naive CD4+ T cell %CD4+ T cell	20.7735	0.0060287
rs36088117	G	T	0.1596	0.03422	3.23e-06	3427	Naive CD4+ T cell %CD4+ T cell	21.7396	0.0063073
rs4959365	A	G	-0.1115	0.02371	2.66e-06	3427	Naive CD4+ T cell %CD4+ T cell	22.1021	0.00641179
rs5767274	C	T	0.1592	0.03482	4.97e-06	3427	Naive CD4+ T cell %CD4+ T cell	20.8918	0.0060628
rs6046769	A	G	0.1057	0.02378	9.13e-06	3427	Naive CD4+ T cell %CD4+ T cell	19.7457	0.00573212
rs62274365	A	G	0.2463	0.05424	5.79e-06	3427	Naive CD4+ T cell %CD4+ T cell	20.608	0.00598095
rs72613709	T	G	-0.2955	0.06105	1.36e-06	3427	Naive CD4+ T cell %CD4+ T cell	23.4148	0.00679001
rs73189225	G	A	0.1668	0.03631	4.53e-06	3427	Naive CD4+ T cell %CD4+ T cell	21.0905	0.00612011
rs77572771	A	G	0.799	0.1797	8.98e-06	3427	Naive CD4+ T cell %CD4+ T cell	19.758	0.00573568
rs79538978	T	C	0.284	0.06183	4.51e-06	3427	Naive CD4+ T cell %CD4+ T cell	21.0855	0.00611869
rs8071815	A	C	0.1072	0.02423	9.92e-06	3427	Naive CD4+ T cell %CD4+ T cell	19.5627	0.0056793
rs11177189	T	G	-0.2451	0.05365	5.1e-06	2911	CD45RA on Terminally Differentiated CD8+ T cell	20.8568	0.00711873
rs111772667	G	A	0.3015	0.06682	6.68e-06	2911	CD45RA on Terminally Differentiated CD8+ T cell	20.3453	0.00694533
rs11634765	T	C	-0.1579	0.03486	6.11e-06	2911	CD45RA on Terminally Differentiated CD8+ T cell	20.5027	0.0069987
rs141423324	G	A	-0.2494	0.05526	6.62e-06	2911	CD45RA on Terminally Differentiated CD8+ T cell	20.3551	0.00694865
rs141550154	A	G	-0.4839	0.1076	7.13e-06	2911	CD45RA on Terminally Differentiated CD8+ T cell	20.211	0.00689982
rs141602247	T	C	0.4724	0.1016	3.44e-06	2911	CD45RA on Terminally Differentiated CD8+ T cell	21.604	0.00737185
rs1861404	G	T	-0.1434	0.03029	2.29e-06	2911	CD45RA on Terminally Differentiated CD8+ T cell	22.3976	0.00764058
rs192211982	T	C	-0.4789	0.1012	2.34e-06	2911	CD45RA on Terminally Differentiated CD8+ T cell	22.3785	0.00763411
rs61141933	C	T	0.2582	0.04145	5.39e-10	2911	CD45RA on Terminally Differentiated CD8+ T cell	38.7762	0.0131544
rs634097	A	G	0.171	0.03843	8.97e-06	2911	CD45RA on Terminally Differentiated CD8+ T cell	19.7858	0.00675562
rs6962836	A	G	-0.165	0.03537	3.22e-06	2911	CD45RA on Terminally Differentiated CD8+ T cell	21.747	0.00742029
rs74516300	C	A	-0.7644	0.1669	4.84e-06	2911	CD45RA on Terminally Differentiated CD8+ T cell	20.9619	0.00715432
rs800067	G	A	-0.129	0.02796	4.14e-06	2911	CD45RA on Terminally Differentiated CD8+ T cell	21.2719	0.00725937
rs11000032	G	A	0.1292	0.02767	3.13e-06	3410	CD62L- plasmacytoid Dendritic Cell %Dendritic Cell	21.7897	0.00635308
rs116054627	G	A	0.2959	0.063	2.74e-06	3410	CD62L- plasmacytoid Dendritic Cell %Dendritic Cell	22.0472	0.00642768
rs146839224	G	A	1.182	0.2447	1.42e-06	3410	CD62L- plasmacytoid Dendritic Cell %Dendritic Cell	23.3191	0.00679596
rs148594241	T	C	-0.3282	0.07246	6.11e-06	3410	CD62L- plasmacytoid Dendritic Cell %Dendritic Cell	20.5034	0.00598027
rs182833362	G	A	1.949	0.408	1.86e-06	3410	CD62L- plasmacytoid Dendritic Cell %Dendritic Cell	22.806	0.00664741
rs1835019	C	T	0.1261	0.02791	6.44e-06	3410	CD62L- plasmacytoid Dendritic Cell %Dendritic Cell	20.4012	0.00595065
rs191779135	A	G	-0.2664	0.04411	1.72e-09	3410	CD62L- plasmacytoid Dendritic Cell %Dendritic Cell	36.4535	0.0105833
rs3827963	A	G	0.1206	0.02628	4.62e-06	3410	CD62L- plasmacytoid Dendritic Cell %Dendritic Cell	21.0469	0.00613784
rs4462104	T	C	-0.1401	0.03077	5.46e-06	3410	CD62L- plasmacytoid Dendritic Cell %Dendritic Cell	20.7189	0.00604275
rs55971447	C	T	-0.3011	0.02899	6.7e-25	3410	CD62L- plasmacytoid Dendritic Cell %Dendritic Cell	107.813	0.0306651
rs56374915	G	A	-0.1787	0.03964	6.77e-06	3410	CD62L- plasmacytoid Dendritic Cell %Dendritic Cell	20.3108	0.00592443
rs61859443	G	A	0.7951	0.1781	8.29e-06	3410	CD62L- plasmacytoid Dendritic Cell %Dendritic Cell	19.9187	0.00581073
rs62297340	C	A	0.1816	0.03899	3.31e-06	3410	CD62L- plasmacytoid Dendritic Cell %Dendritic Cell	21.6806	0.00632145
rs6535445	T	C	-0.3029	0.02564	1.35e-31	3410	CD62L- plasmacytoid Dendritic Cell %Dendritic Cell	139.479	0.0393177
rs75472065	A	C	0.6724	0.1479	5.62e-06	3410	CD62L- plasmacytoid Dendritic Cell %Dendritic Cell	20.6569	0.00602477
rs79976443	G	A	-0.2638	0.05899	7.97e-06	3410	CD62L- plasmacytoid Dendritic Cell %Dendritic Cell	19.9866	0.00583041
rs8044705	T	C	0.1095	0.02473	9.8e-06	3410	CD62L- plasmacytoid Dendritic Cell %Dendritic Cell	19.5941	0.00571657
rs111551789	G	A	0.4285	0.09279	4.01e-06	3427	Effector Memory CD8+ T cell %T cell	21.3131	0.00618431
rs11579717	G	A	-0.981	0.1833	9.23e-08	3427	Effector Memory CD8+ T cell %T cell	28.6259	0.00828866
rs116944484	G	A	-2.133	0.4227	4.77e-07	3427	Effector Memory CD8+ T cell %T cell	25.4486	0.00737544
rs13359589	C	T	-1.62	0.3652	9.5e-06	3427	Effector Memory CD8+ T cell %T cell	19.666	0.0057091
rs140372175	A	C	-0.9734	0.1846	1.43e-07	3427	Effector Memory CD8+ T cell %T cell	27.7885	0.00804814
rs1583072	A	G	-0.1301	0.02836	4.67e-06	3427	Effector Memory CD8+ T cell %T cell	21.0324	0.00610336
rs2275854	A	G	0.1437	0.03222	8.45e-06	3427	Effector Memory CD8+ T cell %T cell	19.8797	0.00577078
rs2442737	G	A	-0.1409	0.03145	7.73e-06	3427	Effector Memory CD8+ T cell %T cell	20.0598	0.00582278
rs4507432	A	G	0.1582	0.03036	1.99e-07	3427	Effector Memory CD8+ T cell %T cell	27.1366	0.00786082
rs4802765	T	C	-0.1403	0.03114	6.81e-06	3427	Effector Memory CD8+ T cell %T cell	20.2873	0.00588843
rs542493	C	A	0.3547	0.07961	8.65e-06	3427	Effector Memory CD8+ T cell %T cell	19.8396	0.00575923
rs58905133	A	G	0.1775	0.02609	1.19e-11	3427	Effector Memory CD8+ T cell %T cell	46.2589	0.0133263
rs7496	C	T	0.2725	0.05671	1.6e-06	3427	Effector Memory CD8+ T cell %T cell	23.076	0.00669242
rs10018308	A	G	0.1198	0.0268	8.09e-06	3656	Memory B cell Absolute Count	19.9713	0.00543589
rs11653761	G	T	-0.1161	0.02478	2.94e-06	3656	Memory B cell Absolute Count	21.9394	0.00596837
rs12216018	C	T	-0.1641	0.03601	5.39e-06	3656	Memory B cell Absolute Count	20.7555	0.00564813
rs12763172	T	C	0.1259	0.02783	6.27e-06	3656	Memory B cell Absolute Count	20.4544	0.00556666
rs12874404	A	G	0.173	0.02661	9.14e-11	3656	Memory B cell Absolute Count	42.244	0.0114289
rs139196765	A	G	1.204	0.2523	1.9e-06	3656	Memory B cell Absolute Count	22.7604	0.00619035
rs16867231	G	A	0.538	0.1157	3.45e-06	3656	Memory B cell Absolute Count	21.6103	0.00587937
rs17708396	C	A	2.504	0.522	1.68e-06	3656	Memory B cell Absolute Count	22.998	0.00625456
rs2879633	G	A	-0.1301	0.02775	2.84e-06	3656	Memory B cell Absolute Count	21.968	0.00597612
rs36072728	C	T	0.305	0.06718	5.81e-06	3656	Memory B cell Absolute Count	20.6007	0.00560624
rs74565175	G	A	0.1371	0.03052	7.27e-06	3656	Memory B cell Absolute Count	20.1682	0.0054892
rs77643931	T	G	0.1235	0.02777	8.97e-06	3656	Memory B cell Absolute Count	19.7672	0.00538063
rs9614226	T	G	-0.4235	0.08713	1.22e-06	3656	Memory B cell Absolute Count	23.6121	0.00642049

## Sheet: Supplement Table 3 
Supplement Table 3. SNPs associated with potential confounders
snp	hg19_coordinates	hg38_coordinates	a1	a2	trait	efo	study	pmid	ancestry	year	beta	se	p	n	n_cases	n_controls	n_studies	unit	dataset
rs73192651	chr13:49638749	C	T	Cause of death: chronic myeloid leukaemia	EFO_0000339	Neale B	UKBB	European	2017	-0.03357	0.006003	2.31e-08	7637	8	7629	1	risk diff	Neale-B_UKBB_EUR_2017
rs73192651	chr13:49638749	C	T	Cause of death: peripheral vascular disease, unspecified	EFO_0003875	Neale B	UKBB	European	2017	-0.03403	0.00474	7.637e-13	7637	5	7632	1	risk diff	Neale-B_UKBB_EUR_2017
rs73192651	chr13:49638749	C	T	Treatment with epaderm ointment	EFO_0007056	Neale B	UKBB	European	2017	-0.003982	0.0007016	1.383e-08	337159	203	336956	1	risk diff	Neale-B_UKBB_EUR_2017
rs11850806	chr14:78202794	G	T	Cause of death: malignant neoplasm of thyroid gland	-	Neale B	UKBB	European	2017	0.006225	0.001333	3.081e-06	7637	4	7633	1	risk diff	Neale-B_UKBB_EUR_2017
rs115307086	chr4:130488608	C	T	Self-reported meningioma or benign meningeal tumour	-	Neale B	UKBB	European	2017	0.0006103	0.0001229	6.832e-07	337159	80	337079	1	risk diff	Neale-B_UKBB_EUR_2017
rs117304580	chr14:72307687	A	C	Cause of death: myelodysplastic syndrome, unspecified	-	Neale B	UKBB	European	2017	0.02009	0.004408	5.244e-06	7637	10	7627	1	risk diff	Neale-B_UKBB_EUR_2017
rs117830252	chr17:11562206	A	G	Cause of death: hodgkins disease, unspecified	EFO_1002031;EFO_0000183	Neale B	UKBB	European	2017	0.006766	0.001408	1.568e-06	7637	6	7631	1	risk diff	Neale-B_UKBB_EUR_2017
rs117830252	chr17:11562206	A	G	Self-reported thalassaemia	-	Neale B	UKBB	European	2017	0.0003858	8.441e-05	4.875e-06	337159	41	337118	1	risk diff	Neale-B_UKBB_EUR_2017
rs117830252	chr17:11562206	A	G	Treatment with volsaid retard 75mg m or r tablet	EFO_0007056	Neale B	UKBB	European	2017	0.0005113	0.0001055	1.243e-06	337159	64	337095	1	risk diff	Neale-B_UKBB_EUR_2017
rs12442442	chr15:39834827	A	G	Cause of death: myelodysplastic syndrome, unspecified	-	Neale B	UKBB	European	2017	0.01496	0.00268	2.446e-08	7637	10	7627	1	risk diff	Neale-B_UKBB_EUR_2017
rs13039776	chr20:64283773	A	G	Cause of death: multiple myeloma	EFO_0001378	Neale B	UKBB	European	2017	-0.03484	0.007594	4.539e-06	7637	87	7550	1	risk diff	Neale-B_UKBB_EUR_2017
rs141481912	chr14:97458438	C	T	Cause of death: malignant neoplasm, primary site unknown, so stated	-	Neale B	UKBB	European	2017	0.03498	0.007439	2.624e-06	7637	38	7599	1	risk diff	Neale-B_UKBB_EUR_2017
rs141644068	chr1:220607868	A	G	Cause of death: malignant neoplasms of independent multiple sites	-	Neale B	UKBB	European	2017	0.02264	0.004057	2.488e-08	7637	20	7617	1	risk diff	Neale-B_UKBB_EUR_2017
rs144942838	chr1:111299704	C	T	Cause of death: malignant neoplasm of ureter	-	Neale B	UKBB	European	2017	-0.01403	0.002167	1.014e-10	7637	9	7628	1	risk diff	Neale-B_UKBB_EUR_2017
rs144942838	chr1:111299704	C	T	Other non-infective disorders of lymphatic vessels and lymph nodes	EFO_0007351	Neale B	UKBB	European	2017	-0.0007001	0.000154	5.454e-06	337199	88	337111	1	risk diff	Neale-B_UKBB_EUR_2017
rs145583539	chr1:66024420	C	T	Cause of death: appendix	-	Neale B	UKBB	European	2017	0.01836	0.003526	1.96e-07	7637	5	7632	1	risk diff	Neale-B_UKBB_EUR_2017
rs145583539	chr1:66024420	C	T	Cause of death: hodgkins disease, unspecified	EFO_1002031;EFO_0000183	Neale B	UKBB	European	2017	0.01824	0.003863	2.373e-06	7637	6	7631	1	risk diff	Neale-B_UKBB_EUR_2017
rs145583539	chr1:66024420	C	T	Self-reported respiratory infection	-	Neale B	UKBB	European	2017	0.001532	0.0003163	1.264e-06	337159	75	337084	1	risk diff	Neale-B_UKBB_EUR_2017
rs146204142	chr7:112677594	A	C	Cause of death: acute and subacute infective endocarditis	EFO_1000830	Neale B	UKBB	European	2017	0.01756	0.003458	3.921e-07	7637	5	7632	1	risk diff	Neale-B_UKBB_EUR_2017
rs146204142	chr7:112677594	A	C	Cause of death: without complications	-	Neale B	UKBB	European	2017	0.01732	0.003788	4.919e-06	7637	6	7631	1	risk diff	Neale-B_UKBB_EUR_2017
rs146204142	chr7:112677594	A	C	Malignant neoplasm of other connective and soft tissue	EFO_0002918	Neale B	UKBB	European	2017	0.001903	0.000384	7.15e-07	337199	132	337067	1	risk diff	Neale-B_UKBB_EUR_2017
rs146204142	chr7:112677594	A	C	Neoplasm of uncertain or unknown behaviour of other and unspecified sites	EFO_0007176	Neale B	UKBB	European	2017	0.003222	0.0006805	2.196e-06	337199	415	336784	1	risk diff	Neale-B_UKBB_EUR_2017
rs146756366	chr3:76610917	C	T	Self-reported lymphoma	EFO_0000574	Neale B	UKBB	European	2017	-0.001312	0.0002836	3.706e-06	337159	92	337067	1	risk diff	Neale-B_UKBB_EUR_2017
rs146975368	chr7:5867968	A	G	Cause of death: malignant neoplasm of thyroid gland	-	Neale B	UKBB	European	2017	0.01538	0.002891	1.082e-07	7637	4	7633	1	risk diff	Neale-B_UKBB_EUR_2017
rs146975368	chr7:5867968	A	G	Cause of death: malignant neoplasm, unspecified	EFO_0000616	Neale B	UKBB	European	2017	0.03061	0.006776	6.337e-06	7637	22	7615	1	risk diff	Neale-B_UKBB_EUR_2017
rs146975368	chr7:5867968	A	G	Treatment with pramipexole	EFO_0007056	Neale B	UKBB	European	2017	0.002157	0.0004507	1.7e-06	337159	157	337002	1	risk diff	Neale-B_UKBB_EUR_2017
rs148484526	chr1:204490818	A	G	Cause of death: pneumonitis due to food and vomit	-	Neale B	UKBB	European	2017	0.01422	0.002936	1.301e-06	7637	8	7629	1	risk diff	Neale-B_UKBB_EUR_2017
rs148484526	chr1:204490818	A	G	Malignant neoplasm of brain	EFO_0000632	Neale B	UKBB	European	2017	0.001303	0.0002801	3.292e-06	337199	158	337041	1	risk diff	Neale-B_UKBB_EUR_2017
rs149582701	chr13:61864547	A	G	Carcinoma in situ of other and unspecified genital organs	EFO_0003863	Neale B	UKBB	European	2017	-0.001603	0.000362	9.567e-06	337199	208	336991	1	risk diff	Neale-B_UKBB_EUR_2017
rs181660070	chr8:116028435	C	T	Cause of death: endocarditis, valve unspecified	EFO_0000465	Neale B	UKBB	European	2017	-0.02028	0.0034	2.58e-09	7637	8	7629	1	risk diff	Neale-B_UKBB_EUR_2017
rs181660070	chr8:116028435	C	T	Malignant neoplasm of anus and anal canal	EFO_0003835	Neale B	UKBB	European	2017	-0.001063	0.0002385	8.267e-06	337199	87	337112	1	risk diff	Neale-B_UKBB_EUR_2017
rs189131343	chr6:166600930	C	T	Cause of death: cardiomegaly	-	Neale B	UKBB	European	2017	-0.02363	0.004677	4.471e-07	7637	18	7619	1	risk diff	Neale-B_UKBB_EUR_2017
rs189131343	chr6:166600930	C	T	Cause of death: malignant neoplasms of independent multiple sites	-	Neale B	UKBB	European	2017	-0.02562	0.004928	2.057e-07	7637	20	7617	1	risk diff	Neale-B_UKBB_EUR_2017
rs3848018	chr13:98382298	A	G	Cause of death: home	-	Neale B	UKBB	European	2017	-0.01408	0.002819	6.012e-07	7637	8	7629	1	risk diff	Neale-B_UKBB_EUR_2017
rs3848018	chr13:98382298	A	G	Malignant neoplasm of other connective and soft tissue	EFO_0002918	Neale B	UKBB	European	2017	-0.001286	0.0002883	8.201e-06	337199	132	337067	1	risk diff	Neale-B_UKBB_EUR_2017
rs3848018	chr13:98382298	A	G	Secondary and unspecified malignant neoplasm of lymph nodes	EFO_0004906	Neale B	UKBB	European	2017	-0.002129	0.000441	1.384e-06	337199	309	336890	1	risk diff	Neale-B_UKBB_EUR_2017
rs3848018	chr13:98382298	A	G	Viral meningitis	EFO_1001236	Neale B	UKBB	European	2017	-0.001177	0.0002497	2.448e-06	337199	99	337100	1	risk diff	Neale-B_UKBB_EUR_2017
rs58243030	chr5:181068180	A	G	Hodgkins disease	EFO_0000183	Neale B	UKBB	European	2017	-0.000969	0.0001984	1.037e-06	337199	104	337095	1	risk diff	Neale-B_UKBB_EUR_2017
rs74416723	chr8:6912182	A	G	Cause of death: home	-	Neale B	UKBB	European	2017	0.01485	0.003207	3.732e-06	7637	5	7632	1	risk diff	Neale-B_UKBB_EUR_2017
rs74416723	chr8:6912182	A	G	Cause of death: malignant neoplasm of thyroid gland	-	Neale B	UKBB	European	2017	0.01521	0.002868	1.161e-07	7637	4	7633	1	risk diff	Neale-B_UKBB_EUR_2017
rs74718830	chr4:35540447	A	G	Cause of death: non-hodgkins lymphoma, unspecified type	EFO_0000183;EFO_0005952	Neale B	UKBB	European	2017	-0.03751	0.008089	3.602e-06	7637	68	7569	1	risk diff	Neale-B_UKBB_EUR_2017
rs75903460	chr2:161901747	C	T	Cause of death: other and unspecified t-cell lymphomas	EFO_0000574	Neale B	UKBB	European	2017	0.008896	0.001987	7.683e-06	7637	9	7628	1	risk diff	Neale-B_UKBB_EUR_2017
rs76543451	chr9:119438730	A	G	Hodgkins disease	EFO_0000183	Neale B	UKBB	European	2017	0.0007908	0.0001768	7.702e-06	337199	104	337095	1	risk diff	Neale-B_UKBB_EUR_2017
rs77814979	chr4:130119944	A	C	Self-reported cancer of lip or mouth/pharynx/oral cavity	EFO_0005570;EFO_0003868	Neale B	UKBB	European	2017	-0.0006459	0.0001453	8.751e-06	337159	78	337081	1	risk diff	Neale-B_UKBB_EUR_2017
rs10505739	chr12:9890919	A	C	Cause of death: mesothelioma of pleura	-	Neale B	UKBB	European	2017	-0.05858	0.00801	2.889e-13	7637	24	7613	1	risk diff	Neale-B_UKBB_EUR_2017
rs10505739	chr12:9890919	A	C	Poisoning by psychotropic drugs	EFO_0008546	Neale B	UKBB	European	2017	-0.004033	0.0008858	5.303e-06	337199	501	336698	1	risk diff	Neale-B_UKBB_EUR_2017
rs10505739	chr12:9890919	A	C	Specific personality disorders	-	Neale B	UKBB	European	2017	-0.001799	0.000392	4.447e-06	337199	98	337101	1	risk diff	Neale-B_UKBB_EUR_2017
rs10505739	chr12:9890919	A	C	Treatment with tetracycline	EFO_0007056	Neale B	UKBB	European	2017	-0.001752	0.0003819	4.481e-06	337159	93	337066	1	risk diff	Neale-B_UKBB_EUR_2017
rs144104650	chr17:5120262	A	G	Cause of death: other and unspecified t-cell lymphomas	EFO_0000574	Neale B	UKBB	European	2017	0.01145	0.002223	2.673e-07	7637	9	7628	1	risk diff	Neale-B_UKBB_EUR_2017
rs146171997	chr5:52851267	A	G	Cause of death: malignant neoplasm of ureter	-	Neale B	UKBB	European	2017	-0.01546	0.003329	3.478e-06	7637	9	7628	1	risk diff	Neale-B_UKBB_EUR_2017
rs147207602	chr20:43065209	A	G	Cause of death: home	-	Neale B	UKBB	European	2017	0.01193	0.002237	1.002e-07	7637	5	7632	1	risk diff	Neale-B_UKBB_EUR_2017
rs147207602	chr20:43065209	A	G	Self-reported chronic lymphocytic	EFO_0000095	Neale B	UKBB	European	2017	0.001679	0.0003567	2.497e-06	337159	221	336938	1	risk diff	Neale-B_UKBB_EUR_2017
rs147841321	chr4:130013111	C	T	Self-reported cancer of lip or mouth/pharynx/oral cavity	EFO_0005570;EFO_0003868	Neale B	UKBB	European	2017	-0.0009862	0.0001675	3.887e-09	337159	78	337081	1	risk diff	Neale-B_UKBB_EUR_2017
rs190764862	chr7:41075337	C	T	Malignant neoplasm of brain	EFO_0000632	Neale B	UKBB	European	2017	-0.001834	0.0004021	5.102e-06	337199	158	337041	1	risk diff	Neale-B_UKBB_EUR_2017
rs190764862	chr7:41075337	C	T	Other acquired deformities of musculoskeletal system and connective tissue	EFO_1001986	Neale B	UKBB	European	2017	-0.001872	0.0004109	5.249e-06	337199	165	337034	1	risk diff	Neale-B_UKBB_EUR_2017
rs190764862	chr7:41075337	C	T	Persons encountering health services for other counselling and medical advice	EFO_0009786	Neale B	UKBB	European	2017	-0.001851	0.0004159	8.538e-06	337199	169	337030	1	risk diff	Neale-B_UKBB_EUR_2017
rs74828441	chr15:29840534	A	C	Cause of death: dissection of aorta	-	Neale B	UKBB	European	2017	-0.0218	0.004274	3.484e-07	7637	40	7597	1	risk diff	Neale-B_UKBB_EUR_2017
rs74828441	chr15:29840534	A	C	Cause of death: malignant neoplasm of gallbladder	-	Neale B	UKBB	European	2017	-0.01454	0.003171	4.605e-06	7637	22	7615	1	risk diff	Neale-B_UKBB_EUR_2017
rs75772839	chr10:31241605	T	C	Cause of death: malignant neoplasm, primary site unknown, so stated	-	Neale B	UKBB	European	2017	0.03465	0.00716	1.326e-06	7637	38	7599	1	risk diff	Neale-B_UKBB_EUR_2017
rs77465871	chr7:47464441	A	G	Doctor diagnosed lung cancer	EFO_0001071	Neale B	UKBB	European	2017	-0.006914	0.001518	5.236e-06	83529	100	83429	1	risk diff	Neale-B_UKBB_EUR_2017
rs77467380	chr16:78628189	C	T	Self-reported tongue cancer	EFO_0003871	Neale B	UKBB	European	2017	-0.001447	0.0003194	5.907e-06	337159	115	337044	1	risk diff	Neale-B_UKBB_EUR_2017
rs77467380	chr16:78628189	C	T	Treatment with risedronate sodium	EFO_0007056	Neale B	UKBB	European	2017	-0.004223	0.0007685	3.911e-08	337159	667	336492	1	risk diff	Neale-B_UKBB_EUR_2017
rs41267263	chr1:35869748	G	T	Cause of death: malignant neoplasm of thyroid gland	-	Neale B	UKBB	European	2017	0.006443	0.001365	2.391e-06	7637	4	7633	1	risk diff	Neale-B_UKBB_EUR_2017
rs117605782	chr18:48915804	A	G	Cause of death: follicular non-hodgkins lymphoma, unspecified	EFO_0000183;EFO_0005952	Neale B	UKBB	European	2017	0.01047	0.002367	9.874e-06	7637	14	7623	1	risk diff	Neale-B_UKBB_EUR_2017
rs34649904	chr14:59563029	C	T	Cause of death: malignant neoplasm of thyroid gland	-	Neale B	UKBB	European	2017	0.005545	0.001033	8.103e-08	7637	4	7633	1	risk diff	Neale-B_UKBB_EUR_2017
rs116433596	chr1:161032851	A	G	Cause of death: pharynx, unspecified	-	Neale B	UKBB	European	2017	0.009165	0.001521	1.778e-09	7637	7	7630	1	risk diff	Neale-B_UKBB_EUR_2017
rs116433596	chr1:161032851	A	G	Self-reported primary bone cancer	EFO_0000311	Neale B	UKBB	European	2017	0.0006463	0.0001295	6.037e-07	337159	105	337054	1	risk diff	Neale-B_UKBB_EUR_2017
rs13361130	chr5:177951902	A	G	Cause of death: acute lymphoblastic leukaemia	EFO_0000220	Neale B	UKBB	European	2017	0.01605	0.003629	9.912e-06	7637	6	7631	1	risk diff	Neale-B_UKBB_EUR_2017
rs13361130	chr5:177951902	A	G	Treatment with nicotine product	EFO_0007056	Neale B	UKBB	European	2017	0.001678	0.0003703	5.824e-06	337159	134	337025	1	risk diff	Neale-B_UKBB_EUR_2017
rs35583090	chr1:160481095	A	G	Cause of death: acute lymphoblastic leukaemia	EFO_0000220	Neale B	UKBB	European	2017	0.01321	0.002382	2.973e-08	7637	6	7631	1	risk diff	Neale-B_UKBB_EUR_2017
rs75068893	chr19:55283071	A	C	Cause of death: malignant neoplasm of thyroid gland	-	Neale B	UKBB	European	2017	-0.01133	0.001754	1.136e-10	7637	4	7633	1	risk diff	Neale-B_UKBB_EUR_2017
rs75379034	chr4:181330153	A	G	Cause of death: malignant neoplasm of thyroid gland	-	Neale B	UKBB	European	2017	0.005657	0.001036	4.943e-08	7637	4	7633	1	risk diff	Neale-B_UKBB_EUR_2017
rs34039593	chr6:32602534	G	T	Body mass index males	EFO_0004340	Akiyama M	28892062	East Asian	2017	-0.03329	0.005987	2.688e-08	90992	0	90992	3	IVNT	Akiyama-M_BMI-M_EAS_2017
rs34039593	chr6:32602534	G	T	Body mass index	EFO_0004340	Akiyama M	28892062	East Asian	2017	-0.02687	0.004411	1.11e-09	173430	0	173430	3	IVNT	Akiyama-M_BMI_EAS_2017
rs34039593	chr6:32602534	G	T	Eosinophil count	EFO_0004586	Astle W	27863252	European	2016	0.03596	0.00429	5.174e-17	173480	0	173480	2	IVNT	Astle-W_Blood-Cell-Traits_EUR_2016
rs34039593	chr6:32602534	G	T	Eosinophil percentage of white cells	EFO_0004586	Astle W	27863252	European	2016	0.02014	0.004286	2.622e-06	173480	0	173480	2	IVNT	Astle-W_Blood-Cell-Traits_EUR_2016
rs34039593	chr6:32602534	G	T	Granulocyte count	EFO_0004586	Astle W	27863252	European	2016	0.04843	0.004319	3.552e-29	173480	0	173480	2	IVNT	Astle-W_Blood-Cell-Traits_EUR_2016
rs34039593	chr6:32602534	G	T	Granulocyte percentage of myeloid white cells	EFO_0004586	Astle W	27863252	European	2016	0.02971	0.004296	4.674e-12	173480	0	173480	2	IVNT	Astle-W_Blood-Cell-Traits_EUR_2016
rs34039593	chr6:32602534	G	T	Lymphocyte count	EFO_0004586	Astle W	27863252	European	2016	0.01965	0.004328	5.622e-06	173480	0	173480	2	IVNT	Astle-W_Blood-Cell-Traits_EUR_2016
rs34039593	chr6:32602534	G	T	Lymphocyte percentage of white cells	EFO_0004586	Astle W	27863252	European	2016	-0.0222	0.004283	2.181e-07	173480	0	173480	2	IVNT	Astle-W_Blood-Cell-Traits_EUR_2016
rs34039593	chr6:32602534	G	T	Monocyte percentage of white cells	EFO_0004586	Astle W	27863252	European	2016	-0.02473	0.004284	7.808e-09	173480	0	173480	2	IVNT	Astle-W_Blood-Cell-Traits_EUR_2016
rs34039593	chr6:32602534	G	T	Myeloid white cell count	EFO_0004586	Astle W	27863252	European	2016	0.04784	0.00433	2.235e-28	173480	0	173480	2	IVNT	Astle-W_Blood-Cell-Traits_EUR_2016
rs34039593	chr6:32602534	G	T	Neutrophil count	EFO_0004586	Astle W	27863252	European	2016	0.04634	0.004308	5.6e-27	173480	0	173480	2	IVNT	Astle-W_Blood-Cell-Traits_EUR_2016
rs34039593	chr6:32602534	G	T	Neutrophil percentage of white cells	EFO_0004586	Astle W	27863252	European	2016	0.02218	0.00429	2.344e-07	173480	0	173480	2	IVNT	Astle-W_Blood-Cell-Traits_EUR_2016
rs34039593	chr6:32602534	G	T	Sum basophil neutrophil counts	EFO_0004586	Astle W	27863252	European	2016	0.04624	0.004316	8.863e-27	173480	0	173480	2	IVNT	Astle-W_Blood-Cell-Traits_EUR_2016
rs34039593	chr6:32602534	G	T	Sum eosinophil basophil counts	EFO_0004586	Astle W	27863252	European	2016	0.03496	0.004295	3.976e-16	173480	0	173480	2	IVNT	Astle-W_Blood-Cell-Traits_EUR_2016
rs34039593	chr6:32602534	G	T	Sum neutrophil eosinophil counts	EFO_0004586	Astle W	27863252	European	2016	0.04844	0.004312	2.765e-29	173480	0	173480	2	IVNT	Astle-W_Blood-Cell-Traits_EUR_2016
rs34039593	chr6:32602534	G	T	White blood cell count	EFO_0004586	Astle W	27863252	European	2016	0.04949	0.004313	1.767e-30	173480	0	173480	2	IVNT	Astle-W_Blood-Cell-Traits_EUR_2016
rs34039593	chr6:32602534	G	T	IgA deficiency	EFO_1001929	Bronson P	27723758	European	2016	-0.5686	0.06155	2.5e-20	6487	1635	4852	7	log OR	Bronson-P_IgAD_EUR_2016
rs34039593	chr6:32602534	G	T	Allergic disease	EFO_0003785	Ferreira M	29083406	European	2017	0.0365	0.0072	4.421e-07	360838	180129	180709	13	log OR	Ferreira-M_Allergic-Disease_EUR_2017
rs34039593	chr6:32602534	G	T	Inflammatory bowel disease	EFO_0003767	IBDGC	26192919	European	2015	-0.2613	0.0251	2.633e-25	34652	12882	21770	15	log OR	IBDGC_IBD_EUR_2015
rs34039593	chr6:32602534	G	T	Ulcerative colitis	EFO_0000729	IBDGC	26192919	European	2015	-0.3657	0.0328	7.204e-29	27432	6968	20464	8	log OR	IBDGC_Ulcerative-Colitis_EUR_2015
rs34039593	chr6:32602534	G	T	Primary sclerosing cholangitis	EFO_0004268	Ji S	27992413	European	2017	-0.6382	0.048	3.006e-42	14890	2871	12019	3	log OR	Ji-S_PSC_EUR_2017
rs34039593	chr6:32602534	G	T	Asthma	EFO_0000270	Neale B	UKBB	European	2017	0.01622	0.0009869	1.201e-60	336782	38791	297991	1	risk diff	Neale-B_UKBB_EUR_2017
rs34039593	chr6:32602534	G	T	Asthma	EFO_0000270	Neale B	UKBB	European	2017	0.00118	0.0001868	2.63e-10	337199	1235	335964	1	risk diff	Neale-B_UKBB_EUR_2017
rs34039593	chr6:32602534	G	T	Chest pain or discomfort	EFO_0003843	Neale B	UKBB	European	2017	0.005643	0.001124	5.18e-07	334053	51937	282116	1	risk diff	Neale-B_UKBB_EUR_2017
rs34039593	chr6:32602534	G	T	Diabetes diagnosed by doctor	EFO_0000400	Neale B	UKBB	European	2017	0.006936	0.0006606	8.79e-26	336473	16183	320290	1	risk diff	Neale-B_UKBB_EUR_2017
rs34039593	chr6:32602534	G	T	Doctor diagnosed asthma	EFO_0000270	Neale B	UKBB	European	2017	0.01792	0.002068	4.43e-18	83529	10589	72940	1	risk diff	Neale-B_UKBB_EUR_2017
rs34039593	chr6:32602534	G	T	Eye problems or disorders: diabetes related eye disease	EFO_0009486	Neale B	UKBB	European	2017	0.006292	0.0007406	1.996e-17	108817	2072	106745	1	risk diff	Neale-B_UKBB_EUR_2017
rs34039593	chr6:32602534	G	T	Forced vital capacity	EFO_0004312	Neale B	UKBB	European	2017	-0.01431	0.002505	1.102e-08	307638	0	307638	1	IVNT	Neale-B_UKBB_EUR_2017
rs34039593	chr6:32602534	G	T	Forced vital capacity, best measure	EFO_0004312	Neale B	UKBB	European	2017	-0.01408	0.002747	2.99e-07	255492	0	255492	1	IVNT	Neale-B_UKBB_EUR_2017
rs34039593	chr6:32602534	G	T	Hand grip strength left	EFO_0006941	Neale B	UKBB	European	2017	-0.01493	0.002222	1.813e-11	335821	0	335821	1	IVNT	Neale-B_UKBB_EUR_2017
rs34039593	chr6:32602534	G	T	Hand grip strength right	EFO_0006941	Neale B	UKBB	European	2017	-0.0169	0.002227	3.241e-14	335842	0	335842	1	IVNT	Neale-B_UKBB_EUR_2017
rs34039593	chr6:32602534	G	T	Height	EFO_0004339	Neale B	UKBB	European	2017	-0.01159	0.00219	1.218e-07	336474	0	336474	1	IVNT	Neale-B_UKBB_EUR_2017
rs34039593	chr6:32602534	G	T	Illnesses of siblings: diabetes	EFO_0000400	Neale B	UKBB	European	2017	0.00639	0.0009519	1.915e-11	261075	21747	239328	1	risk diff	Neale-B_UKBB_EUR_2017
rs34039593	chr6:32602534	G	T	Insulin-dependent diabetes mellitus	EFO_0001359	Neale B	UKBB	European	2017	0.001367	0.0001105	3.717e-35	337199	431	336768	1	risk diff	Neale-B_UKBB_EUR_2017
rs34039593	chr6:32602534	G	T	Intestinal malabsorption	EFO_0009554	Neale B	UKBB	European	2017	-0.001282	0.0001329	5.233e-22	337199	624	336575	1	risk diff	Neale-B_UKBB_EUR_2017
rs34039593	chr6:32602534	G	T	Long-standing illness, disability or infirmity	-	Neale B	UKBB	European	2017	0.01538	0.001462	7.066e-26	329663	107123	222540	1	risk diff	Neale-B_UKBB_EUR_2017
rs34039593	chr6:32602534	G	T	Medication for cholesterol, blood pressure or diabetes: insulin	EFO_0007056	Neale B	UKBB	European	2017	0.007061	0.0005293	1.404e-40	154702	2116	152586	1	risk diff	Neale-B_UKBB_EUR_2017
rs34039593	chr6:32602534	G	T	Medication for pain relief, constipation, heartburn: none of the above	EFO_0007056	Neale B	UKBB	European	2017	-0.008635	0.001543	2.191e-08	333581	184936	148645	1	risk diff	Neale-B_UKBB_EUR_2017
rs34039593	chr6:32602534	G	T	Nasal polyp	EFO_1000391	Neale B	UKBB	European	2017	0.001932	0.0002148	2.356e-19	337199	1637	335562	1	risk diff	Neale-B_UKBB_EUR_2017
rs34039593	chr6:32602534	G	T	No blood clot, bronchitis, emphysema, asthma, rhinitis, eczema or allergy diagnosed by doctor	-	Neale B	UKBB	European	2017	-0.008674	0.001443	1.866e-09	336782	228530	108252	1	risk diff	Neale-B_UKBB_EUR_2017
rs34039593	chr6:32602534	G	T	Number of self-reported non-cancer illnesses	EFO_0009801	Neale B	UKBB	European	2017	0.02264	0.002545	6.017e-19	337159	0	337159	1	-	Neale-B_UKBB_EUR_2017
rs34039593	chr6:32602534	G	T	Number of treatments or medications taken	EFO_0007056	Neale B	UKBB	European	2017	0.02802	0.002471	8.649e-30	337159	0	337159	1	-	Neale-B_UKBB_EUR_2017
rs34039593	chr6:32602534	G	T	Other disorders of pancreatic internal secretion	EFO_0009605	Neale B	UKBB	European	2017	0.0004822	8.037e-05	1.988e-09	337199	228	336971	1	risk diff	Neale-B_UKBB_EUR_2017
rs34039593	chr6:32602534	G	T	Other rheumatoid arthritis	EFO_0000685	Neale B	UKBB	European	2017	0.002908	0.000165	1.705e-69	337199	964	336235	1	risk diff	Neale-B_UKBB_EUR_2017
rs34039593	chr6:32602534	G	T	Overall health rating	-	Neale B	UKBB	European	2017	0.01734	0.002238	9.469e-15	336020	0	336020	1	-	Neale-B_UKBB_EUR_2017
rs34039593	chr6:32602534	G	T	Self-reported asthma	EFO_0000270	Neale B	UKBB	European	2017	0.01657	0.0009888	5.169e-63	337159	39049	298110	1	risk diff	Neale-B_UKBB_EUR_2017
rs34039593	chr6:32602534	G	T	Self-reported cervical cancer	EFO_0001061	Neale B	UKBB	European	2017	0.0009929	0.0001947	3.423e-07	337159	1347	335812	1	risk diff	Neale-B_UKBB_EUR_2017
rs34039593	chr6:32602534	G	T	Self-reported diabetes	EFO_0000400	Neale B	UKBB	European	2017	0.005635	0.0005991	5.198e-21	337159	13243	323916	1	risk diff	Neale-B_UKBB_EUR_2017
rs34039593	chr6:32602534	G	T	Self-reported eczema or dermatitis	EFO_0000274	Neale B	UKBB	European	2017	0.002749	0.0004908	2.117e-08	337159	8718	328441	1	risk diff	Neale-B_UKBB_EUR_2017
rs34039593	chr6:32602534	G	T	Self-reported hyperthyroidism or thyrotoxicosis	EFO_0004705;EFO_0004283	Neale B	UKBB	European	2017	-0.001198	0.0002674	7.432e-06	337159	2547	334612	1	risk diff	Neale-B_UKBB_EUR_2017
rs34039593	chr6:32602534	G	T	Self-reported hypothyroidism or myxoedema	EFO_0004705;EFO_1001055	Neale B	UKBB	European	2017	0.009405	0.000658	2.455e-46	337159	16376	320783	1	risk diff	Neale-B_UKBB_EUR_2017
rs34039593	chr6:32602534	G	T	Self-reported malabsorption or coeliac disease	EFO_0001060	Neale B	UKBB	European	2017	-0.003142	0.0002024	2.436e-54	337159	1452	335707	1	risk diff	Neale-B_UKBB_EUR_2017
rs34039593	chr6:32602534	G	T	Self-reported multiple sclerosis	EFO_0003885	Neale B	UKBB	European	2017	-0.001351	0.0001862	4.034e-13	337159	1228	335931	1	risk diff	Neale-B_UKBB_EUR_2017
rs34039593	chr6:32602534	G	T	Self-reported nasal polyps	EFO_1000391	Neale B	UKBB	European	2017	0.001297	0.000205	2.49e-10	337159	1489	335670	1	risk diff	Neale-B_UKBB_EUR_2017
rs34039593	chr6:32602534	G	T	Self-reported polymyalgia rheumatica	EFO_0008518	Neale B	UKBB	European	2017	0.001582	0.0001407	2.489e-29	337159	700	336459	1	risk diff	Neale-B_UKBB_EUR_2017
rs34039593	chr6:32602534	G	T	Self-reported psoriasis	EFO_0000676	Neale B	UKBB	European	2017	-0.001543	0.0003294	2.797e-06	337159	3871	333288	1	risk diff	Neale-B_UKBB_EUR_2017
rs34039593	chr6:32602534	G	T	Self-reported rheumatoid arthritis	EFO_0000685	Neale B	UKBB	European	2017	0.00759	0.000323	5.674e-122	337159	3730	333429	1	risk diff	Neale-B_UKBB_EUR_2017
rs34039593	chr6:32602534	G	T	Self-reported sarcoidosis	-	Neale B	UKBB	European	2017	-0.000751	0.0001356	3.093e-08	337159	650	336509	1	risk diff	Neale-B_UKBB_EUR_2017
rs34039593	chr6:32602534	G	T	Self-reported type 1 diabetes	EFO_0001359	Neale B	UKBB	European	2017	0.0009859	9.002e-05	6.536e-28	337159	286	336873	1	risk diff	Neale-B_UKBB_EUR_2017
rs34039593	chr6:32602534	G	T	Self-reported ulcerative colitis	EFO_0000729	Neale B	UKBB	European	2017	-0.001247	0.000225	2.968e-08	337159	1795	335364	1	risk diff	Neale-B_UKBB_EUR_2017
rs34039593	chr6:32602534	G	T	Seropositive rheumatoid arthritis	EFO_0000685	Neale B	UKBB	European	2017	0.0008473	7.546e-05	2.991e-29	337199	201	336998	1	risk diff	Neale-B_UKBB_EUR_2017
rs34039593	chr6:32602534	G	T	Sitting height	EFO_0004339	Neale B	UKBB	European	2017	-0.01321	0.002382	2.923e-08	336172	0	336172	1	IVNT	Neale-B_UKBB_EUR_2017
rs34039593	chr6:32602534	G	T	Started insulin within one year diagnosis of diabetes	EFO_0000400	Neale B	UKBB	European	2017	0.07752	0.004523	3.186e-65	15397	1872	13525	1	risk diff	Neale-B_UKBB_EUR_2017
rs34039593	chr6:32602534	G	T	Taking other prescription medications	EFO_0007056	Neale B	UKBB	European	2017	0.01695	0.001544	4.725e-28	336330	158113	178217	1	risk diff	Neale-B_UKBB_EUR_2017
rs34039593	chr6:32602534	G	T	Treatment with beclometasone	EFO_0007056	Neale B	UKBB	European	2017	0.001533	0.0002959	2.218e-07	337159	3116	334043	1	risk diff	Neale-B_UKBB_EUR_2017
rs34039593	chr6:32602534	G	T	Treatment with becotide 50 inhaler	EFO_0007056	Neale B	UKBB	European	2017	0.001188	0.0002411	8.34e-07	337159	2063	335096	1	risk diff	Neale-B_UKBB_EUR_2017
rs34039593	chr6:32602534	G	T	Treatment with folic acid product	EFO_0007056	Neale B	UKBB	European	2017	0.003471	0.0002795	2.117e-35	337159	2779	334380	1	risk diff	Neale-B_UKBB_EUR_2017
rs34039593	chr6:32602534	G	T	Treatment with hydroxychloroquine	EFO_0007056	Neale B	UKBB	European	2017	0.0007539	0.0001151	5.79e-11	337159	468	336691	1	risk diff	Neale-B_UKBB_EUR_2017
rs34039593	chr6:32602534	G	T	Treatment with insulin	EFO_0007056	Neale B	UKBB	European	2017	0.004685	0.0003685	5.195e-37	180203	1377	178826	1	risk diff	Neale-B_UKBB_EUR_2017
rs34039593	chr6:32602534	G	T	Treatment with insulin product	EFO_0007056	Neale B	UKBB	European	2017	0.005621	0.000305	8.821e-76	337159	3319	333840	1	risk diff	Neale-B_UKBB_EUR_2017
rs34039593	chr6:32602534	G	T	Treatment with leflunomide	EFO_0007056	Neale B	UKBB	European	2017	0.0004187	6.434e-05	7.603e-11	337159	146	337013	1	risk diff	Neale-B_UKBB_EUR_2017
rs34039593	chr6:32602534	G	T	Treatment with levothyroxine sodium	EFO_0007056	Neale B	UKBB	European	2017	0.006591	0.0006064	1.644e-27	337159	13717	323442	1	risk diff	Neale-B_UKBB_EUR_2017
rs34039593	chr6:32602534	G	T	Treatment with methotrexate	EFO_0007056	Neale B	UKBB	European	2017	0.004349	0.0002238	4.721e-84	337159	1778	335381	1	risk diff	Neale-B_UKBB_EUR_2017
rs34039593	chr6:32602534	G	T	Treatment with paracetamol	EFO_0007056	Neale B	UKBB	European	2017	0.005418	0.001191	5.427e-06	337159	62050	275109	1	risk diff	Neale-B_UKBB_EUR_2017
rs34039593	chr6:32602534	G	T	Treatment with prednisolone	EFO_0007056	Neale B	UKBB	European	2017	0.001946	0.0002339	8.709e-17	337159	1940	335219	1	risk diff	Neale-B_UKBB_EUR_2017
rs34039593	chr6:32602534	G	T	Treatment with qvar 50 inhaler	EFO_0007056	Neale B	UKBB	European	2017	0.0008417	0.0001898	9.194e-06	337159	1275	335884	1	risk diff	Neale-B_UKBB_EUR_2017
rs34039593	chr6:32602534	G	T	Treatment with salazopyrin 500mg tablet	EFO_0007056	Neale B	UKBB	European	2017	0.000364	7.825e-05	3.298e-06	337159	216	336943	1	risk diff	Neale-B_UKBB_EUR_2017
rs34039593	chr6:32602534	G	T	Treatment with salbutamol	EFO_0007056	Neale B	UKBB	European	2017	0.001731	0.0003336	2.115e-07	337159	3972	333187	1	risk diff	Neale-B_UKBB_EUR_2017
rs34039593	chr6:32602534	G	T	Treatment with seretide 50 evohaler	EFO_0007056	Neale B	UKBB	European	2017	0.002344	0.0003332	1.974e-12	337159	3961	333198	1	risk diff	Neale-B_UKBB_EUR_2017
rs34039593	chr6:32602534	G	T	Treatment with simvastatin	EFO_0007056	Neale B	UKBB	European	2017	0.004331	0.0009772	9.331e-06	337159	38492	298667	1	risk diff	Neale-B_UKBB_EUR_2017
rs34039593	chr6:32602534	G	T	Treatment with sulfasalazine	EFO_0007056	Neale B	UKBB	European	2017	0.001419	0.0001354	1.114e-25	337159	648	336511	1	risk diff	Neale-B_UKBB_EUR_2017
rs34039593	chr6:32602534	G	T	Treatment with sulphasalazine	EFO_0007056	Neale B	UKBB	European	2017	0.0004464	7.064e-05	2.626e-10	337159	176	336983	1	risk diff	Neale-B_UKBB_EUR_2017
rs34039593	chr6:32602534	G	T	Treatment with symbicort 100 or 6 turbohaler	EFO_0007056	Neale B	UKBB	European	2017	0.00131	0.0002427	6.673e-08	337159	2089	335070	1	risk diff	Neale-B_UKBB_EUR_2017
rs34039593	chr6:32602534	G	T	Treatment with thyroxine product	EFO_0007056	Neale B	UKBB	European	2017	0.001924	0.0003304	5.761e-09	337159	3917	333242	1	risk diff	Neale-B_UKBB_EUR_2017
rs34039593	chr6:32602534	G	T	Treatment with ventolin 100micrograms inhaler	EFO_0007056	Neale B	UKBB	European	2017	0.005509	0.0005171	1.704e-26	337159	9712	327447	1	risk diff	Neale-B_UKBB_EUR_2017
rs34039593	chr6:32602534	G	T	Trunk fat-free mass	-	Neale B	UKBB	European	2017	-0.009744	0.001941	5.199e-07	331030	0	331030	1	IVNT	Neale-B_UKBB_EUR_2017
rs34039593	chr6:32602534	G	T	Trunk predicted mass	-	Neale B	UKBB	European	2017	-0.009619	0.001935	6.666e-07	330995	0	330995	1	IVNT	Neale-B_UKBB_EUR_2017
rs34039593	chr6:32602534	G	T	Ulcerative colitis	EFO_0000729	Neale B	UKBB	European	2017	-0.0009602	0.0002111	5.39e-06	337199	1579	335620	1	risk diff	Neale-B_UKBB_EUR_2017
rs34039593	chr6:32602534	G	T	Vitamin and mineral supplements: folic acid or folate	EFO_0005111	Neale B	UKBB	European	2017	0.003859	0.0004387	1.432e-18	335591	6876	328715	1	risk diff	Neale-B_UKBB_EUR_2017
rs34039593	chr6:32602534	G	T	Vitamin and mineral supplements: none of the above	EFO_0004729	Neale B	UKBB	European	2017	-0.01063	0.001428	9.589e-14	335591	231424	104167	1	risk diff	Neale-B_UKBB_EUR_2017
rs34039593	chr6:32602534	G	T	Vitamin and mineral supplements: vitamin C	EFO_0004729	Neale B	UKBB	European	2017	0.004068	0.0008645	2.533e-06	335591	28536	307055	1	risk diff	Neale-B_UKBB_EUR_2017
rs34039593	chr6:32602534	G	T	Wheeze or whistling in the chest in last year	EFO_0009715	Neale B	UKBB	European	2017	0.01527	0.001262	1.083e-33	331257	68531	262726	1	risk diff	Neale-B_UKBB_EUR_2017
rs34039593	chr6:32602534	G	T	Whole body fat-free mass	-	Neale B	UKBB	European	2017	-0.008776	0.001949	6.696e-06	331291	0	331291	1	IVNT	Neale-B_UKBB_EUR_2017
rs34039593	chr6:32602534	G	T	Whole body water mass	-	Neale B	UKBB	European	2017	-0.008942	0.001952	4.623e-06	331315	0	331315	1	IVNT	Neale-B_UKBB_EUR_2017
rs34039593	chr6:32602534	G	T	Rheumatoid arthritis	EFO_0000685	Okada Y	24390342	East Asian	2014	0.5978	0.02786	1.9e-91	22515	4873	17642	4	log OR	Okada-Y_RA_EAS_2014
rs34039593	chr6:32602534	G	T	Rheumatoid arthritis	EFO_0000685	Okada Y	24390342	European	2014	1.171	0.02511	1e-250	58284	14361	43923	18	log OR	Okada-Y_RA_EUR_2014
rs34039593	chr6:32602534	G	T	Rheumatoid arthritis	EFO_0000685	Okada Y	24390342	Mixed	2014	0.9676	0.01343	1e-250	80799	19234	61565	22	log OR	Okada-Y_RA_Mixed_2014
rs144295598	chr22:44768291	A	G	Cause of death: other and unspecified t-cell lymphomas	EFO_0000574	Neale B	UKBB	European	2017	0.02227	0.003747	2.945e-09	7637	9	7628	1	risk diff	Neale-B_UKBB_EUR_2017
rs597808	chr12:111535554	G	A	Basophil count	EFO_0004586	Astle W	27863252	European	2016	-0.02387	0.003513	1.083e-11	173480	0	173480	2	IVNT	Astle-W_Blood-Cell-Traits_EUR_2016
rs597808	chr12:111535554	G	A	Eosinophil count	EFO_0004586	Astle W	27863252	European	2016	-0.1019	0.003579	2.17e-178	173480	0	173480	2	IVNT	Astle-W_Blood-Cell-Traits_EUR_2016
rs597808	chr12:111535554	G	A	Eosinophil percentage of granulocytes	EFO_0004586	Astle W	27863252	European	2016	-0.08522	0.003592	2.07e-124	173480	0	173480	2	IVNT	Astle-W_Blood-Cell-Traits_EUR_2016
rs597808	chr12:111535554	G	A	Eosinophil percentage of white cells	EFO_0004586	Astle W	27863252	European	2016	-0.0827	0.003577	2.75e-118	173480	0	173480	2	IVNT	Astle-W_Blood-Cell-Traits_EUR_2016
rs597808	chr12:111535554	G	A	Granulocyte count	EFO_0004586	Astle W	27863252	European	2016	-0.03392	0.003605	4.98e-21	173480	0	173480	2	IVNT	Astle-W_Blood-Cell-Traits_EUR_2016
rs597808	chr12:111535554	G	A	Hematocrit	EFO_0004586	Astle W	27863252	European	2016	-0.06349	0.003546	1.104e-71	173480	0	173480	2	IVNT	Astle-W_Blood-Cell-Traits_EUR_2016
rs597808	chr12:111535554	G	A	Hemoglobin concentration	EFO_0004586	Astle W	27863252	European	2016	-0.06486	0.003562	4.449e-74	173480	0	173480	2	IVNT	Astle-W_Blood-Cell-Traits_EUR_2016
rs597808	chr12:111535554	G	A	High light scatter percentage of red cells	EFO_0004586	Astle W	27863252	European	2016	-0.05856	0.0036	1.695e-59	173480	0	173480	2	IVNT	Astle-W_Blood-Cell-Traits_EUR_2016
rs597808	chr12:111535554	G	A	High light scatter reticulocyte count	EFO_0004586	Astle W	27863252	European	2016	-0.06587	0.0036	8.836e-75	173480	0	173480	2	IVNT	Astle-W_Blood-Cell-Traits_EUR_2016
rs597808	chr12:111535554	G	A	Immature fraction of reticulocytes	EFO_0004586	Astle W	27863252	European	2016	-0.03125	0.003566	1.918e-18	173480	0	173480	2	IVNT	Astle-W_Blood-Cell-Traits_EUR_2016
rs597808	chr12:111535554	G	A	Lymphocyte count	EFO_0004586	Astle W	27863252	European	2016	-0.0889	0.003614	1.22e-133	173480	0	173480	2	IVNT	Astle-W_Blood-Cell-Traits_EUR_2016
rs597808	chr12:111535554	G	A	Lymphocyte percentage of white cells	EFO_0004586	Astle W	27863252	European	2016	-0.04096	0.003576	2.247e-30	173480	0	173480	2	IVNT	Astle-W_Blood-Cell-Traits_EUR_2016
rs597808	chr12:111535554	G	A	Monocyte count	EFO_0004586	Astle W	27863252	European	2016	-0.0494	0.003588	3.921e-43	173480	0	173480	2	IVNT	Astle-W_Blood-Cell-Traits_EUR_2016
rs597808	chr12:111535554	G	A	Myeloid white cell count	EFO_0004586	Astle W	27863252	European	2016	-0.03846	0.003614	1.911e-26	173480	0	173480	2	IVNT	Astle-W_Blood-Cell-Traits_EUR_2016
rs597808	chr12:111535554	G	A	Neutrophil count	EFO_0004586	Astle W	27863252	European	2016	-0.02472	0.003596	6.28e-12	173480	0	173480	2	IVNT	Astle-W_Blood-Cell-Traits_EUR_2016
rs597808	chr12:111535554	G	A	Neutrophil percentage of granulocytes	EFO_0004586	Astle W	27863252	European	2016	0.07887	0.003593	8.4e-107	173480	0	173480	2	IVNT	Astle-W_Blood-Cell-Traits_EUR_2016
rs597808	chr12:111535554	G	A	Neutrophil percentage of white cells	EFO_0004586	Astle W	27863252	European	2016	0.05058	0.003583	2.905e-45	173480	0	173480	2	IVNT	Astle-W_Blood-Cell-Traits_EUR_2016
rs597808	chr12:111535554	G	A	Platelet count	EFO_0004586	Astle W	27863252	European	2016	-0.1039	0.003657	1.42e-177	173480	0	173480	2	IVNT	Astle-W_Blood-Cell-Traits_EUR_2016
rs597808	chr12:111535554	G	A	Platelet distribution width	EFO_0004586	Astle W	27863252	European	2016	-0.01991	0.003606	3.345e-08	173480	0	173480	2	IVNT	Astle-W_Blood-Cell-Traits_EUR_2016
rs597808	chr12:111535554	G	A	Plateletcrit	EFO_0004586	Astle W	27863252	European	2016	-0.1145	0.003669	1.24e-213	173480	0	173480	2	IVNT	Astle-W_Blood-Cell-Traits_EUR_2016
rs597808	chr12:111535554	G	A	Red blood cell count	EFO_0004586	Astle W	27863252	European	2016	-0.04919	0.003572	3.801e-43	173480	0	173480	2	IVNT	Astle-W_Blood-Cell-Traits_EUR_2016
rs597808	chr12:111535554	G	A	Reticulocyte count	EFO_0004586	Astle W	27863252	European	2016	-0.0727	0.003606	2.29e-90	173480	0	173480	2	IVNT	Astle-W_Blood-Cell-Traits_EUR_2016
rs597808	chr12:111535554	G	A	Reticulocyte fraction of red cells	EFO_0004586	Astle W	27863252	European	2016	-0.06298	0.003604	2.245e-68	173480	0	173480	2	IVNT	Astle-W_Blood-Cell-Traits_EUR_2016
rs597808	chr12:111535554	G	A	Sum basophil neutrophil counts	EFO_0004586	Astle W	27863252	European	2016	-0.02599	0.003602	5.438e-13	173480	0	173480	2	IVNT	Astle-W_Blood-Cell-Traits_EUR_2016
rs597808	chr12:111535554	G	A	Sum eosinophil basophil counts	EFO_0004586	Astle W	27863252	European	2016	-0.09812	0.003583	3.95e-165	173480	0	173480	2	IVNT	Astle-W_Blood-Cell-Traits_EUR_2016
rs597808	chr12:111535554	G	A	Sum neutrophil eosinophil counts	EFO_0004586	Astle W	27863252	European	2016	-0.03292	0.0036	6.004e-20	173480	0	173480	2	IVNT	Astle-W_Blood-Cell-Traits_EUR_2016
rs597808	chr12:111535554	G	A	White blood cell count	EFO_0004586	Astle W	27863252	European	2016	-0.06335	0.003598	2.242e-69	173480	0	173480	2	IVNT	Astle-W_Blood-Cell-Traits_EUR_2016
rs597808	chr12:111535554	G	A	Coronary artery disease	EFO_0000378;EFO_0001645	CARDIoGRAMplusC4D	26343387	Mixed	2015	-0.06121	0.01064	8.75e-09	184305	60801	123504	48	log OR	CARDIoGRAMplusC4D_CHD_Mixed_2015
rs597808	chr12:111535554	G	A	Myocardial infarction	EFO_0000612	CARDIoGRAMplusC4D	26343387	Mixed	2015	-0.06987	0.01176	2.871e-09	167181	43677	123504	48	log OR	CARDIoGRAMplusC4D_MI_Mixed_2015
rs597808	chr12:111535554	G	A	Maternal effects on offspring birthweight	EFO_0004344	EGGC	29309628	European	2018	0.0345	0.0064	7.5e-08	48632	0	48632	25	Z-score	EGGC_MBW_EUR_2018
rs597808	chr12:111535554	G	A	Allergic disease	EFO_0003785	Ferreira M	29083406	European	2017	0.0304	0.0058	1.622e-07	360838	180129	180709	13	log OR	Ferreira-M_Allergic-Disease_EUR_2017
rs597808	chr12:111535554	G	A	Systemic lupus erythematosus	EFO_0002690	Bentham J	26502338	European	2015	-0.1655	0.02674	6e-10	-	-	-	-	log OR	NHGRI-EBI_GWAS_Catalog
rs597808	chr12:111535554	G	A	Acute myocardial infarction	EFO_1000883	Neale B	UKBB	European	2017	-0.001603	0.0002616	8.939e-10	337199	3927	333272	1	risk diff	Neale-B_UKBB_EUR_2017
rs597808	chr12:111535554	G	A	Arm fat-free mass left	-	Neale B	UKBB	European	2017	0.0154	0.001549	2.767e-23	331159	0	331159	1	IVNT	Neale-B_UKBB_EUR_2017
rs597808	chr12:111535554	G	A	Arm fat-free mass right	-	Neale B	UKBB	European	2017	0.01481	0.001518	1.811e-22	331221	0	331221	1	IVNT	Neale-B_UKBB_EUR_2017
rs597808	chr12:111535554	G	A	Arm predicted mass left	-	Neale B	UKBB	European	2017	0.01482	0.001544	7.81e-22	331146	0	331146	1	IVNT	Neale-B_UKBB_EUR_2017
rs597808	chr12:111535554	G	A	Arm predicted mass right	-	Neale B	UKBB	European	2017	0.0146	0.001513	5.007e-22	331216	0	331216	1	IVNT	Neale-B_UKBB_EUR_2017
rs597808	chr12:111535554	G	A	Basal metabolic rate	EFO_0007777	Neale B	UKBB	European	2017	0.01455	0.001616	2.19e-19	331307	0	331307	1	IVNT	Neale-B_UKBB_EUR_2017
rs597808	chr12:111535554	G	A	Birth weight	EFO_0004344	Neale B	UKBB	European	2017	0.02961	0.003173	1.056e-20	193063	0	193063	1	IVNT	Neale-B_UKBB_EUR_2017
rs597808	chr12:111535554	G	A	Birth weight of first child	EFO_0004344	Neale B	UKBB	European	2017	0.04186	0.004456	5.791e-21	145558	0	145558	1	-	Neale-B_UKBB_EUR_2017
rs597808	chr12:111535554	G	A	Blood clot in the leg	-	Neale B	UKBB	European	2017	-0.001593	0.0003468	4.328e-06	336782	6905	329877	1	risk diff	Neale-B_UKBB_EUR_2017
rs597808	chr12:111535554	G	A	Chronic ischaemic heart disease	EFO_0001645	Neale B	UKBB	European	2017	-0.002011	0.0003866	1.972e-07	337199	8755	328444	1	risk diff	Neale-B_UKBB_EUR_2017
rs597808	chr12:111535554	G	A	Comparative height size at age 10	-	Neale B	UKBB	European	2017	0.01243	0.001664	7.894e-14	332021	0	332021	1	-	Neale-B_UKBB_EUR_2017
rs597808	chr12:111535554	G	A	Diabetes diagnosed by doctor	EFO_0000400	Neale B	UKBB	European	2017	-0.002334	0.0005226	7.949e-06	336473	16183	320290	1	risk diff	Neale-B_UKBB_EUR_2017
rs597808	chr12:111535554	G	A	Diastolic blood pressure	EFO_0006336	Neale B	UKBB	European	2017	-0.03839	0.002469	1.712e-54	317756	0	317756	1	IVNT	Neale-B_UKBB_EUR_2017
rs597808	chr12:111535554	G	A	Doctor diagnosed hayfever or allergic rhinitis	EFO_0005854	Neale B	UKBB	European	2017	0.009545	0.002053	3.351e-06	83529	18934	64595	1	risk diff	Neale-B_UKBB_EUR_2017
rs597808	chr12:111535554	G	A	Ever smoked	EFO_0006527	Neale B	UKBB	European	2017	-0.006318	0.001193	1.188e-07	336067	202585	133482	1	risk diff	Neale-B_UKBB_EUR_2017
rs597808	chr12:111535554	G	A	Hayfever, allergic rhinitis or eczema	EFO_0003956;EFO_0005854;EFO_0000274	Neale B	UKBB	European	2017	0.008171	0.00103	2.177e-15	336782	77891	258891	1	risk diff	Neale-B_UKBB_EUR_2017
rs597808	chr12:111535554	G	A	Height	EFO_0004339	Neale B	UKBB	European	2017	0.01092	0.001732	2.834e-10	336474	0	336474	1	IVNT	Neale-B_UKBB_EUR_2017
rs597808	chr12:111535554	G	A	Hip circumference	EFO_0005093	Neale B	UKBB	European	2017	0.01576	0.002414	6.621e-11	336601	0	336601	1	IVNT	Neale-B_UKBB_EUR_2017
rs597808	chr12:111535554	G	A	Illnesses of father: heart disease	EFO_0003777	Neale B	UKBB	European	2017	-0.006954	0.001218	1.125e-08	298237	97385	200852	1	risk diff	Neale-B_UKBB_EUR_2017
rs597808	chr12:111535554	G	A	Illnesses of father: none of the above, group 1	-	Neale B	UKBB	European	2017	0.006435	0.001265	3.604e-07	294791	109206	185585	1	risk diff	Neale-B_UKBB_EUR_2017
rs597808	chr12:111535554	G	A	Illnesses of mother: high blood pressure	EFO_0004325	Neale B	UKBB	European	2017	-0.005197	0.001165	8.096e-06	311681	94817	216864	1	risk diff	Neale-B_UKBB_EUR_2017
rs597808	chr12:111535554	G	A	Illnesses of siblings: high blood pressure	EFO_0004325	Neale B	UKBB	European	2017	-0.007022	0.001112	2.68e-10	262361	54270	208091	1	risk diff	Neale-B_UKBB_EUR_2017
rs597808	chr12:111535554	G	A	Illnesses of siblings: none of the above, group 1	-	Neale B	UKBB	European	2017	0.008951	0.001303	6.418e-12	262734	178376	84358	1	risk diff	Neale-B_UKBB_EUR_2017
rs597808	chr12:111535554	G	A	Impedance of arm left	-	Neale B	UKBB	European	2017	-0.01479	0.001721	8.469e-18	331292	0	331292	1	IVNT	Neale-B_UKBB_EUR_2017
rs597808	chr12:111535554	G	A	Impedance of arm right	-	Neale B	UKBB	European	2017	-0.01372	0.001714	1.196e-15	331279	0	331279	1	IVNT	Neale-B_UKBB_EUR_2017
rs597808	chr12:111535554	G	A	Impedance of leg left	-	Neale B	UKBB	European	2017	-0.0104	0.002222	2.865e-06	331296	0	331296	1	IVNT	Neale-B_UKBB_EUR_2017
rs597808	chr12:111535554	G	A	Impedance of leg right	-	Neale B	UKBB	European	2017	-0.0119	0.002205	6.836e-08	331301	0	331301	1	IVNT	Neale-B_UKBB_EUR_2017
rs597808	chr12:111535554	G	A	Impedance of whole body	-	Neale B	UKBB	European	2017	-0.0142	0.001858	2.147e-14	331284	0	331284	1	IVNT	Neale-B_UKBB_EUR_2017
rs597808	chr12:111535554	G	A	Leg fat-free mass left	-	Neale B	UKBB	European	2017	0.01203	0.001605	6.583e-14	331258	0	331258	1	IVNT	Neale-B_UKBB_EUR_2017
rs597808	chr12:111535554	G	A	Leg fat-free mass right	-	Neale B	UKBB	European	2017	0.0126	0.001604	3.929e-15	331285	0	331285	1	IVNT	Neale-B_UKBB_EUR_2017
rs597808	chr12:111535554	G	A	Leg predicted mass left	-	Neale B	UKBB	European	2017	0.01181	0.001594	1.255e-13	331253	0	331253	1	IVNT	Neale-B_UKBB_EUR_2017
rs597808	chr12:111535554	G	A	Leg predicted mass right	-	Neale B	UKBB	European	2017	0.01256	0.001594	3.336e-15	331285	0	331285	1	IVNT	Neale-B_UKBB_EUR_2017
rs597808	chr12:111535554	G	A	Long-standing illness, disability or infirmity	-	Neale B	UKBB	European	2017	-0.006128	0.001156	1.16e-07	329663	107123	222540	1	risk diff	Neale-B_UKBB_EUR_2017
rs597808	chr12:111535554	G	A	Mean time to correctly identify matches	-	Neale B	UKBB	European	2017	-0.01299	0.002409	6.968e-08	335139	0	335139	1	IVNT	Neale-B_UKBB_EUR_2017
rs597808	chr12:111535554	G	A	Medication for cholesterol, blood pressure or diabetes: blood pressure medication	EFO_0007056	Neale B	UKBB	European	2017	-0.01355	0.001564	4.656e-18	154702	38548	116154	1	risk diff	Neale-B_UKBB_EUR_2017
rs597808	chr12:111535554	G	A	Medication for cholesterol, blood pressure or diabetes: none of the above	EFO_0007056	Neale B	UKBB	European	2017	0.01104	0.001706	9.664e-11	154702	103004	51698	1	risk diff	Neale-B_UKBB_EUR_2017
rs597808	chr12:111535554	G	A	Medication for pain relief, constipation, heartburn: aspirin	EFO_0007056	Neale B	UKBB	European	2017	-0.004126	0.0008474	1.123e-06	333581	46946	286635	1	risk diff	Neale-B_UKBB_EUR_2017
rs597808	chr12:111535554	G	A	Medication for pain relief, constipation, heartburn: omeprazole	EFO_0007056	Neale B	UKBB	European	2017	-0.002781	0.0005842	1.936e-06	333581	20058	313523	1	risk diff	Neale-B_UKBB_EUR_2017
rs597808	chr12:111535554	G	A	No blood clot, bronchitis, emphysema, asthma, rhinitis, eczema or allergy diagnosed by doctor	-	Neale B	UKBB	European	2017	-0.007204	0.001142	2.797e-10	336782	228530	108252	1	risk diff	Neale-B_UKBB_EUR_2017
rs597808	chr12:111535554	G	A	No treatment with medication for cholesterol, blood pressure, diabetes, or take exogenous hormones	EFO_0007056	Neale B	UKBB	European	2017	0.01032	0.001546	2.454e-11	180203	124239	55964	1	risk diff	Neale-B_UKBB_EUR_2017
rs597808	chr12:111535554	G	A	Number of self-reported non-cancer illnesses	EFO_0009801	Neale B	UKBB	European	2017	-0.01365	0.002013	1.194e-11	337159	0	337159	1	-	Neale-B_UKBB_EUR_2017
rs597808	chr12:111535554	G	A	Number of treatments or medications taken	EFO_0007056	Neale B	UKBB	European	2017	-0.01479	0.001955	3.91e-14	337159	0	337159	1	-	Neale-B_UKBB_EUR_2017
rs597808	chr12:111535554	G	A	Past tobacco smoking	EFO_0006527	Neale B	UKBB	European	2017	0.02158	0.003177	1.106e-11	310749	0	310749	1	-	Neale-B_UKBB_EUR_2017
rs597808	chr12:111535554	G	A	Self-reported deep venous thrombosis	EFO_0003907	Neale B	UKBB	European	2017	-0.00155	0.000343	6.215e-06	337159	6767	330392	1	risk diff	Neale-B_UKBB_EUR_2017
rs597808	chr12:111535554	G	A	Self-reported gout	EFO_0004274	Neale B	UKBB	European	2017	-0.001314	0.0002881	5.091e-06	337159	4807	332352	1	risk diff	Neale-B_UKBB_EUR_2017
rs597808	chr12:111535554	G	A	Self-reported hayfever or allergic rhinitis	EFO_0005854	Neale B	UKBB	European	2017	0.002514	0.0005683	9.675e-06	337159	19320	317839	1	risk diff	Neale-B_UKBB_EUR_2017
rs597808	chr12:111535554	G	A	Self-reported heart attack or myocardial infarction	EFO_0000612	Neale B	UKBB	European	2017	-0.002025	0.000364	2.67e-08	337159	7735	329424	1	risk diff	Neale-B_UKBB_EUR_2017
rs597808	chr12:111535554	G	A	Self-reported hypertension	EFO_0000537	Neale B	UKBB	European	2017	-0.01154	0.001069	3.624e-27	337159	87690	249469	1	risk diff	Neale-B_UKBB_EUR_2017
rs597808	chr12:111535554	G	A	Self-reported hypothyroidism or myxoedema	EFO_0004705;EFO_1001055	Neale B	UKBB	European	2017	-0.00982	0.0005202	1.969e-79	337159	16376	320783	1	risk diff	Neale-B_UKBB_EUR_2017
rs597808	chr12:111535554	G	A	Self-reported malabsorption or coeliac disease	EFO_0001060	Neale B	UKBB	European	2017	-0.0007499	0.0001601	2.826e-06	337159	1452	335707	1	risk diff	Neale-B_UKBB_EUR_2017
rs597808	chr12:111535554	G	A	Self-reported psoriasis	EFO_0000676	Neale B	UKBB	European	2017	-0.00138	0.0002605	1.169e-07	337159	3871	333288	1	risk diff	Neale-B_UKBB_EUR_2017
rs597808	chr12:111535554	G	A	Smoking status: previous	EFO_0006527	Neale B	UKBB	European	2017	-0.007525	0.001167	1.133e-10	336024	118419	217605	1	risk diff	Neale-B_UKBB_EUR_2017
rs597808	chr12:111535554	G	A	Systolic blood pressure	EFO_0006335	Neale B	UKBB	European	2017	-0.02144	0.002468	3.743e-18	317754	0	317754	1	IVNT	Neale-B_UKBB_EUR_2017
rs597808	chr12:111535554	G	A	Taking other prescription medications	EFO_0007056	Neale B	UKBB	European	2017	-0.009657	0.001221	2.591e-15	336330	158113	178217	1	risk diff	Neale-B_UKBB_EUR_2017
rs597808	chr12:111535554	G	A	Treatment with allopurinol	EFO_0007056	Neale B	UKBB	European	2017	-0.001209	0.0002575	2.657e-06	337159	3819	333340	1	risk diff	Neale-B_UKBB_EUR_2017
rs597808	chr12:111535554	G	A	Treatment with aspirin	EFO_0007056	Neale B	UKBB	European	2017	-0.003999	0.0008248	1.247e-06	337159	45012	292147	1	risk diff	Neale-B_UKBB_EUR_2017
rs597808	chr12:111535554	G	A	Treatment with atenolol	EFO_0007056	Neale B	UKBB	European	2017	-0.003746	0.0004735	2.54e-15	337159	13184	323975	1	risk diff	Neale-B_UKBB_EUR_2017
rs597808	chr12:111535554	G	A	Treatment with bendroflumethiazide	EFO_0007056	Neale B	UKBB	European	2017	-0.002979	0.0005651	1.346e-07	337159	19084	318075	1	risk diff	Neale-B_UKBB_EUR_2017
rs597808	chr12:111535554	G	A	Treatment with blood pressure medication	EFO_0007056	Neale B	UKBB	European	2017	-0.01017	0.001268	1.067e-15	180203	31488	148715	1	risk diff	Neale-B_UKBB_EUR_2017
rs597808	chr12:111535554	G	A	Treatment with folic acid product	EFO_0007056	Neale B	UKBB	European	2017	-0.001045	0.0002211	2.257e-06	337159	2779	334380	1	risk diff	Neale-B_UKBB_EUR_2017
rs597808	chr12:111535554	G	A	Treatment with insulin product	EFO_0007056	Neale B	UKBB	European	2017	-0.001118	0.0002414	3.608e-06	337159	3319	333840	1	risk diff	Neale-B_UKBB_EUR_2017
rs597808	chr12:111535554	G	A	Treatment with levothyroxine sodium	EFO_0007056	Neale B	UKBB	European	2017	-0.007999	0.0004795	1.885e-62	337159	13717	323442	1	risk diff	Neale-B_UKBB_EUR_2017
rs597808	chr12:111535554	G	A	Treatment with ramipril	EFO_0007056	Neale B	UKBB	European	2017	-0.00232	0.0005148	6.601e-06	337159	15787	321372	1	risk diff	Neale-B_UKBB_EUR_2017
rs597808	chr12:111535554	G	A	Treatment with thyroxine product	EFO_0007056	Neale B	UKBB	European	2017	-0.001995	0.0002613	2.269e-14	337159	3917	333242	1	risk diff	Neale-B_UKBB_EUR_2017
rs597808	chr12:111535554	G	A	Treatment with thyroxine sodium	EFO_0007056	Neale B	UKBB	European	2017	-0.0005977	0.0001288	3.455e-06	337159	938	336221	1	risk diff	Neale-B_UKBB_EUR_2017
rs597808	chr12:111535554	G	A	Trunk fat-free mass	-	Neale B	UKBB	European	2017	0.01539	0.001535	1.2e-23	331030	0	331030	1	IVNT	Neale-B_UKBB_EUR_2017
rs597808	chr12:111535554	G	A	Trunk predicted mass	-	Neale B	UKBB	European	2017	0.01533	0.00153	1.279e-23	330995	0	330995	1	IVNT	Neale-B_UKBB_EUR_2017
rs597808	chr12:111535554	G	A	Vascular or heart problems diagnosed by doctor: angina	EFO_0000378	Neale B	UKBB	European	2017	-0.001898	0.0004263	8.489e-06	336683	10618	326065	1	risk diff	Neale-B_UKBB_EUR_2017
rs597808	chr12:111535554	G	A	Vascular or heart problems diagnosed by doctor: heart attack	EFO_0000612	Neale B	UKBB	European	2017	-0.001977	0.0003658	6.497e-08	336683	7790	328893	1	risk diff	Neale-B_UKBB_EUR_2017
rs597808	chr12:111535554	G	A	Vascular or heart problems diagnosed by doctor: high blood pressure	EFO_0004325	Neale B	UKBB	European	2017	-0.012	0.001084	1.797e-28	336683	91033	245650	1	risk diff	Neale-B_UKBB_EUR_2017
rs597808	chr12:111535554	G	A	Vascular or heart problems diagnosed by doctor: none of the above	-	Neale B	UKBB	European	2017	0.01327	0.001113	9.075e-33	336683	236530	100153	1	risk diff	Neale-B_UKBB_EUR_2017
rs597808	chr12:111535554	G	A	Vascular or heart problems diagnosed by doctor: stroke	EFO_0000712	Neale B	UKBB	European	2017	-0.001379	0.0003015	4.786e-06	336683	5198	331485	1	risk diff	Neale-B_UKBB_EUR_2017
rs597808	chr12:111535554	G	A	Weight	EFO_0004338	Neale B	UKBB	European	2017	0.01323	0.00213	5.222e-10	336227	0	336227	1	IVNT	Neale-B_UKBB_EUR_2017
rs597808	chr12:111535554	G	A	Whole body fat-free mass	-	Neale B	UKBB	European	2017	0.01465	0.001541	1.998e-21	331291	0	331291	1	IVNT	Neale-B_UKBB_EUR_2017
rs597808	chr12:111535554	G	A	Whole body water mass	-	Neale B	UKBB	European	2017	0.01469	0.001543	1.735e-21	331315	0	331315	1	IVNT	Neale-B_UKBB_EUR_2017
rs597808	chr12:111535554	G	A	Coronary artery disease	EFO_0000378;EFO_0001645	Nelson CP	28714975	Mixed	2017	-0.05649	0.009	3.6e-10	148715	10801	137914	1	log OR	Nelson-CP_CAD_Mixed_2017
rs597808	chr12:111535554	G	A	Rheumatoid arthritis	EFO_0000685	Okada Y	24390342	European	2014	-0.07696	0.01646	7.5e-07	58284	14361	43923	18	log OR	Okada-Y_RA_EUR_2014
rs597808	chr12:111535554	G	A	Rheumatoid arthritis	EFO_0000685	Okada Y	24390342	Mixed	2014	-0.07696	0.01646	7.4e-07	80799	19234	61565	22	log OR	Okada-Y_RA_Mixed_2014
rs597808	chr12:111535554	G	A	Coronary artery disease	EFO_0000378;EFO_0001645	van der Harst P	29212778	Mixed	2018	-0.06394	0.007128	2.9e-19	296525	34541	261984	1	log OR	van-der-Harst-P_CAD-UKBB_Mixed_2018
rs597808	chr12:111535554	G	A	Coronary artery disease	EFO_0000378;EFO_0001645	van der Harst P	29212778	Mixed	2018	-0.0631	0.006	5.112e-26	547261	122733	424528	2	log OR	van-der-Harst-P_CAD_Mixed_2018
rs10155782	chr6:37188691	C	T	Cause of death: other and unspecified intestinal obstruction	-	Neale B	UKBB	European	2017	0.01106	0.002051	7.135e-08	7637	7	7630	1	risk diff	Neale-B_UKBB_EUR_2017
rs10155782	chr6:37188691	C	T	Cause of death: pulmonary embolism without mention of acute cor pulmonale	-	Neale B	UKBB	European	2017	0.0189	0.004167	5.808e-06	7637	29	7608	1	risk diff	Neale-B_UKBB_EUR_2017
rs10824158	chr10:52156108	G	T	Supervision of high-risk pregnancy	EFO_0009573	Neale B	UKBB	European	2017	-0.0005291	0.000117	6.176e-06	337199	106	337093	1	risk diff	Neale-B_UKBB_EUR_2017
rs117127715	chr8:31457912	A	G	Cause of death: interstitial pulmonary disease, unspecified	-	Neale B	UKBB	European	2017	0.02627	0.004906	8.775e-08	7637	19	7618	1	risk diff	Neale-B_UKBB_EUR_2017
rs117127715	chr8:31457912	A	G	Prolonged pregnancy	EFO_0009681	Neale B	UKBB	European	2017	0.002311	0.0005112	6.165e-06	337199	405	336794	1	risk diff	Neale-B_UKBB_EUR_2017
rs117127715	chr8:31457912	A	G	Treatment with dovonex scalp solution	EFO_0007056	Neale B	UKBB	European	2017	0.001055	0.0002128	7.13e-07	337159	70	337089	1	risk diff	Neale-B_UKBB_EUR_2017
rs117609491	chr8:105828614	A	G	Complications of the puerperium	-	Neale B	UKBB	European	2017	0.0008016	0.0001669	1.563e-06	337199	81	337118	1	risk diff	Neale-B_UKBB_EUR_2017
rs146661200	chr12:100100345	C	T	Hemiplegia	EFO_0009453	Neale B	UKBB	European	2017	-0.001232	0.0002684	4.452e-06	337199	256	336943	1	risk diff	Neale-B_UKBB_EUR_2017
rs180972485	chr20:24476394	A	G	Cause of death: acute and subacute infective endocarditis	EFO_1000830	Neale B	UKBB	European	2017	0.01376	0.002519	4.869e-08	7637	5	7632	1	risk diff	Neale-B_UKBB_EUR_2017
rs180972485	chr20:24476394	A	G	Paraplegia and tetraplegia	-	Neale B	UKBB	European	2017	0.001027	0.0002167	2.151e-06	337199	63	337136	1	risk diff	Neale-B_UKBB_EUR_2017
rs78676406	chr5:119159240	C	T	Cause of death: car occupant injured in unspecified traffic accident	-	Neale B	UKBB	European	2017	-0.01004	0.001749	9.712e-09	7637	8	7629	1	risk diff	Neale-B_UKBB_EUR_2017
rs111747460	chr3:73967167	A	G	Dislocation, sprain and strain of joints and ligaments at ankle and foot level	EFO_1002021	Neale B	UKBB	European	2017	0.0007618	0.0001616	2.432e-06	337199	79	337120	1	risk diff	Neale-B_UKBB_EUR_2017
rs114230155	chr1:102330781	A	G	Osteoporosis with pathological fracture	EFO_0003882	Neale B	UKBB	European	2017	0.0008183	0.0001645	6.558e-07	337199	76	337123	1	risk diff	Neale-B_UKBB_EUR_2017
rs116916598	chr11:121876290	A	G	Cause of death: car occupant injured in unspecified traffic accident	-	Neale B	UKBB	European	2017	-0.01057	0.002343	6.545e-06	7637	8	7629	1	risk diff	Neale-B_UKBB_EUR_2017
rs116916598	chr11:121876290	A	G	Cause of death: multiple sclerosis	EFO_0003885	Neale B	UKBB	European	2017	-0.01968	0.004054	1.239e-06	7637	24	7613	1	risk diff	Neale-B_UKBB_EUR_2017
rs115052567	chr3:169934084	A	G	Cause of death: chronic or unspecified with haemorrhage	-	Neale B	UKBB	European	2017	0.01105	0.002482	8.638e-06	7637	11	7626	1	risk diff	Neale-B_UKBB_EUR_2017
rs117433099	chr7:6895261	A	G	Cause of death: gastro-intestinal haemorrhage, unspecified	-	Neale B	UKBB	European	2017	0.007476	0.001595	2.828e-06	7637	7	7630	1	risk diff	Neale-B_UKBB_EUR_2017
rs145057921	chr7:6191579	G	T	Cause of death: intracranial haemorrhage, unspecified	EFO_0000551	Neale B	UKBB	European	2017	-0.01763	0.003779	3.156e-06	7637	15	7622	1	risk diff	Neale-B_UKBB_EUR_2017
rs145057921	chr7:6191579	G	T	Cause of death: thoracic aortic aneurysm, ruptured	-	Neale B	UKBB	European	2017	-0.01359	0.002581	1.429e-07	7637	7	7630	1	risk diff	Neale-B_UKBB_EUR_2017
rs147563624	chr10:5335252	C	T	Cause of death: intracranial haemorrhage, unspecified	EFO_0000551	Neale B	UKBB	European	2017	-0.01637	0.003485	2.678e-06	7637	15	7622	1	risk diff	Neale-B_UKBB_EUR_2017
rs147563624	chr10:5335252	C	T	Self-reported dysmenorrhoea or dysmenorrhea	-	Neale B	UKBB	European	2017	-0.001413	0.0003075	4.313e-06	337159	226	336933	1	risk diff	Neale-B_UKBB_EUR_2017
rs150994087	chr18:59041560	C	T	Cause of death: chronic obstructive pulmonary disease with acute exacerbation, unspecified	-	Neale B	UKBB	European	2017	-0.03069	0.005198	3.672e-09	7637	30	7607	1	risk diff	Neale-B_UKBB_EUR_2017
rs150994087	chr18:59041560	C	T	Cause of death: subarachnoid haemorrhage from intracranial artery, unspecified	EFO_0000713	Neale B	UKBB	European	2017	-0.01285	0.002513	3.26e-07	7637	7	7630	1	risk diff	Neale-B_UKBB_EUR_2017
rs75510626	chr6:63691241	C	T	Cause of death: chronic or unspecified with haemorrhage	-	Neale B	UKBB	European	2017	0.01508	0.00313	1.466e-06	7637	11	7626	1	risk diff	Neale-B_UKBB_EUR_2017
rs77390603	chr10:4646000	A	C	Cause of death: stroke, not specified as haemorrhage or infarction	EFO_0000712	Neale B	UKBB	European	2017	0.02626	0.005775	5.496e-06	7637	88	7549	1	risk diff	Neale-B_UKBB_EUR_2017
rs77538429	chr1:110200363	A	G	Cause of death: gastro-intestinal haemorrhage, unspecified	-	Neale B	UKBB	European	2017	-0.007574	0.001663	5.328e-06	7637	7	7630	1	risk diff	Neale-B_UKBB_EUR_2017
rs148381451	chr17:65089439	C	T	Cause of death: subarachnoid haemorrhage, unspecified	-	Neale B	UKBB	European	2017	-0.02289	0.004927	3.433e-06	7637	64	7573	1	risk diff	Neale-B_UKBB_EUR_2017
rs60924036	chr15:34743665	A	G	Cause of death: subarachnoid haemorrhage from intracranial artery, unspecified	EFO_0000713	Neale B	UKBB	European	2017	-0.01049	0.002269	3.874e-06	7637	7	7630	1	risk diff	Neale-B_UKBB_EUR_2017
rs17583875	chr1:197955640	A	G	Age-related macular degeneration	EFO_0001365	Fritsche LG	26691988	European	2015	NA	NA	4.47e-20	33976	16144	17832	26	log OR	Fritsche-L_AMD_EUR_2016
rs17583875	chr1:197955640	A	G	Age-related macular degeneration	EFO_0001365	Fritsche L	23455636	Mixed	2013	NA	NA	2.922e-06	49804	5430	44374	15	log OR	Fritsche-L_AMD_Mixed_2013
rs17583875	chr1:197955640	A	G	Advanced age related macular degeneration	NCIT_C84391;HP_0007868	Fritsche L	23455636	Mixed	2013	NA	NA	2.922e-06	59494	-	-	-	-	GRASP
rs17583875	chr1:197955640	A	G	Cause of death: subarachnoid haemorrhage from intracranial artery, unspecified	EFO_0000713	Neale B	UKBB	European	2017	0.007944	0.001632	1.143e-06	7637	7	7630	1	risk diff	Neale-B_UKBB_EUR_2017
rs187924827	chr17:6425927	C	T	Cause of death: appendix	-	Neale B	UKBB	European	2017	-0.007329	0.001614	5.683e-06	7637	5	7632	1	risk diff	Neale-B_UKBB_EUR_2017
rs187924827	chr17:6425927	C	T	Treatment with hydrocortisone	EFO_0007056	Neale B	UKBB	European	2017	-0.002048	0.00041	5.861e-07	337159	612	336547	1	risk diff	Neale-B_UKBB_EUR_2017
rs80305889	chr7:34641989	G	T	Treatment with oestrogen product	EFO_0007056	Neale B	UKBB	European	2017	0.0007934	0.0001751	5.904e-06	337159	137	337022	1	risk diff	Neale-B_UKBB_EUR_2017

## Sheet: Supplement Table 4
Supplement Table 4. Summary results of 2 sample-MR analyses in locus-wide significance level
Outcome	Exposure	Method	nSNP	Beta	SE	Pval	OR	LCI	UCI
Venous thromboembolism || FinnGen-R9-I9_VTE	IgD+ B cell %B cell	MR Egger	11	0.0233617	0.0426136	0.596874	1.02364	0.941613	1.11281
Venous thromboembolism || FinnGen-R9-I9_VTE	IgD+ B cell %B cell	Weighted median	11	0.00790993	0.0255432	0.756813	1.00794	0.958721	1.05969
Venous thromboembolism || FinnGen-R9-I9_VTE	IgD+ B cell %B cell	Inverse variance weighted	11	-0.00332688	0.0285763	0.907319	0.996679	0.94239	1.0541
Venous thromboembolism || FinnGen-R9-I9_VTE	IgD+ B cell %B cell	Simple mode	11	0.035729	0.0314195	0.281985	1.03637	0.974478	1.1022
Venous thromboembolism || FinnGen-R9-I9_VTE	IgD+ B cell %B cell	Weighted mode	11	0.00786463	0.0235687	0.745505	1.0079	0.962395	1.05555
Venous thromboembolism || FinnGen-R9-I9_VTE	CD39+ secreting CD4 regulatory T cell %CD4 regulatory T cell	MR Egger	16	-0.0227455	0.0139527	0.125348	0.977511	0.951141	1.00461
Venous thromboembolism || FinnGen-R9-I9_VTE	CD39+ secreting CD4 regulatory T cell %CD4 regulatory T cell	Weighted median	16	-0.0106878	0.013194	0.417912	0.989369	0.964112	1.01529
Venous thromboembolism || FinnGen-R9-I9_VTE	CD39+ secreting CD4 regulatory T cell %CD4 regulatory T cell	Inverse variance weighted	16	-0.00205592	0.0101409	0.839343	0.997946	0.978307	1.01798
Venous thromboembolism || FinnGen-R9-I9_VTE	CD39+ secreting CD4 regulatory T cell %CD4 regulatory T cell	Simple mode	16	0.00745642	0.0251902	0.771285	1.00748	0.95895	1.05847
Venous thromboembolism || FinnGen-R9-I9_VTE	CD39+ secreting CD4 regulatory T cell %CD4 regulatory T cell	Weighted mode	16	-0.00922942	0.0114633	0.433322	0.990813	0.9688	1.01333
Venous thromboembolism || FinnGen-R9-I9_VTE	CD14- CD16+ monocyte Absolute Count	MR Egger	17	-0.0132451	0.014282	0.368401	0.986842	0.959601	1.01486
Venous thromboembolism || FinnGen-R9-I9_VTE	CD14- CD16+ monocyte Absolute Count	Weighted median	17	-0.00782914	0.0146102	0.592049	0.992201	0.964192	1.02102
Venous thromboembolism || FinnGen-R9-I9_VTE	CD14- CD16+ monocyte Absolute Count	Inverse variance weighted	17	-0.0130233	0.0113174	0.249842	0.987061	0.965407	1.0092
Venous thromboembolism || FinnGen-R9-I9_VTE	CD14- CD16+ monocyte Absolute Count	Simple mode	17	0.000412067	0.0298563	0.989159	1.00041	0.94355	1.0607
Venous thromboembolism || FinnGen-R9-I9_VTE	CD14- CD16+ monocyte Absolute Count	Weighted mode	17	-0.00759504	0.0138484	0.590959	0.992434	0.965859	1.01974
Venous thromboembolism || FinnGen-R9-I9_VTE	Naive-mature B cell Absolute Count	MR Egger	19	0.00512752	0.013599	0.710801	1.00514	0.978703	1.03229
Venous thromboembolism || FinnGen-R9-I9_VTE	Naive-mature B cell Absolute Count	Weighted median	19	0.00676715	0.012723	0.594806	1.00679	0.981994	1.03221
Venous thromboembolism || FinnGen-R9-I9_VTE	Naive-mature B cell Absolute Count	Inverse variance weighted	19	0.00853585	0.0108491	0.431411	1.00857	0.987352	1.03025
Venous thromboembolism || FinnGen-R9-I9_VTE	Naive-mature B cell Absolute Count	Simple mode	19	0.0280569	0.0381776	0.471865	1.02845	0.954306	1.10836
Venous thromboembolism || FinnGen-R9-I9_VTE	Naive-mature B cell Absolute Count	Weighted mode	19	0.00770476	0.0116898	0.518173	1.00773	0.984908	1.03109
Venous thromboembolism || FinnGen-R9-I9_VTE	CD14+ CD16+ monocyte Absolute Count	MR Egger	17	-0.00359139	0.0324174	0.913255	0.996415	0.935074	1.06178
Venous thromboembolism || FinnGen-R9-I9_VTE	CD14+ CD16+ monocyte Absolute Count	Weighted median	17	0.00064786	0.0200561	0.974231	1.00065	0.962076	1.04077
Venous thromboembolism || FinnGen-R9-I9_VTE	CD14+ CD16+ monocyte Absolute Count	Inverse variance weighted	17	0.00869545	0.0213882	0.684336	1.00873	0.96732	1.05192
Venous thromboembolism || FinnGen-R9-I9_VTE	CD14+ CD16+ monocyte Absolute Count	Simple mode	17	0.0107481	0.031148	0.73454	1.01081	0.950942	1.07444
Venous thromboembolism || FinnGen-R9-I9_VTE	CD14+ CD16+ monocyte Absolute Count	Weighted mode	17	-0.00533831	0.0185573	0.777294	0.994676	0.959147	1.03152
Venous thromboembolism || FinnGen-R9-I9_VTE	CD14- CD16- Absolute Count	MR Egger	21	-0.00352903	0.0137094	0.799625	0.996477	0.970058	1.02362
Venous thromboembolism || FinnGen-R9-I9_VTE	CD14- CD16- Absolute Count	Weighted median	21	-0.0193099	0.0170147	0.256418	0.980875	0.948704	1.01414
Venous thromboembolism || FinnGen-R9-I9_VTE	CD14- CD16- Absolute Count	Inverse variance weighted	21	-0.000521977	0.0108061	0.961474	0.999478	0.978532	1.02087
Venous thromboembolism || FinnGen-R9-I9_VTE	CD14- CD16- Absolute Count	Simple mode	21	-0.00602213	0.0286842	0.835834	0.993996	0.939654	1.05148
Venous thromboembolism || FinnGen-R9-I9_VTE	CD14- CD16- Absolute Count	Weighted mode	21	-0.0162614	0.0154589	0.305383	0.98387	0.954507	1.01414
Venous thromboembolism || FinnGen-R9-I9_VTE	CD14+ CD16- monocyte Absolute Count	MR Egger	22	0.00480721	0.0112483	0.673675	1.00482	0.982908	1.02722
Venous thromboembolism || FinnGen-R9-I9_VTE	CD14+ CD16- monocyte Absolute Count	Weighted median	22	1.18341e-05	0.0108951	0.999133	1.00001	0.978884	1.0216
Venous thromboembolism || FinnGen-R9-I9_VTE	CD14+ CD16- monocyte Absolute Count	Inverse variance weighted	22	-0.00360548	0.00985576	0.714496	0.996401	0.977338	1.01584
Venous thromboembolism || FinnGen-R9-I9_VTE	CD14+ CD16- monocyte Absolute Count	Simple mode	22	-0.045519	0.0316873	0.16559	0.955501	0.897963	1.01673
Venous thromboembolism || FinnGen-R9-I9_VTE	CD14+ CD16- monocyte Absolute Count	Weighted mode	22	0.00112855	0.00972875	0.908753	1.00113	0.98222	1.0204
Venous thromboembolism || FinnGen-R9-I9_VTE	Monocyte Absolute Count	MR Egger	21	0.00939083	0.0116274	0.429291	1.00944	0.98669	1.0327
Venous thromboembolism || FinnGen-R9-I9_VTE	Monocyte Absolute Count	Weighted median	21	0.000712535	0.00985548	0.942364	1.00071	0.981568	1.02023
Venous thromboembolism || FinnGen-R9-I9_VTE	Monocyte Absolute Count	Inverse variance weighted	21	-0.00117103	0.010574	0.911818	0.99883	0.978342	1.01975
Venous thromboembolism || FinnGen-R9-I9_VTE	Monocyte Absolute Count	Simple mode	21	-0.0457928	0.0301894	0.144952	0.95524	0.900357	1.01347
Venous thromboembolism || FinnGen-R9-I9_VTE	Monocyte Absolute Count	Weighted mode	21	0.00192416	0.00814755	0.815707	1.00193	0.986053	1.01805
Venous thromboembolism || FinnGen-R9-I9_VTE	CD14- CD16+ monocyte %monocyte	MR Egger	20	0.0080139	0.0264008	0.764954	1.00805	0.957211	1.06158
Venous thromboembolism || FinnGen-R9-I9_VTE	CD14- CD16+ monocyte %monocyte	Weighted median	20	0.0156568	0.0241337	0.516498	1.01578	0.96885	1.06498
Venous thromboembolism || FinnGen-R9-I9_VTE	CD14- CD16+ monocyte %monocyte	Inverse variance weighted	20	0.0127159	0.0170954	0.456983	1.0128	0.979424	1.04731
Venous thromboembolism || FinnGen-R9-I9_VTE	CD14- CD16+ monocyte %monocyte	Simple mode	20	0.0398911	0.0335418	0.248974	1.0407	0.97448	1.11141
Venous thromboembolism || FinnGen-R9-I9_VTE	CD14- CD16+ monocyte %monocyte	Weighted mode	20	0.0204337	0.0259574	0.440874	1.02064	0.970016	1.07391
Venous thromboembolism || FinnGen-R9-I9_VTE	CD14+ CD16+ monocyte %monocyte	MR Egger	21	-0.0135885	0.0373855	0.720267	0.986503	0.916802	1.0615
Venous thromboembolism || FinnGen-R9-I9_VTE	CD14+ CD16+ monocyte %monocyte	Weighted median	21	-0.0153162	0.0233311	0.511521	0.9848	0.940781	1.03088
Venous thromboembolism || FinnGen-R9-I9_VTE	CD14+ CD16+ monocyte %monocyte	Inverse variance weighted	21	0.0254186	0.0217958	0.243526	1.02574	0.982848	1.07051
Venous thromboembolism || FinnGen-R9-I9_VTE	CD14+ CD16+ monocyte %monocyte	Simple mode	21	0.034146	0.0550117	0.541804	1.03474	0.928972	1.15254
Venous thromboembolism || FinnGen-R9-I9_VTE	CD14+ CD16+ monocyte %monocyte	Weighted mode	21	-0.0104198	0.0224146	0.647046	0.989634	0.947098	1.03408
Venous thromboembolism || FinnGen-R9-I9_VTE	CD14+ CD16- monocyte %monocyte	MR Egger	22	-0.000473639	0.00867024	0.956977	0.999526	0.982684	1.01666
Venous thromboembolism || FinnGen-R9-I9_VTE	CD14+ CD16- monocyte %monocyte	Weighted median	22	0.000961665	0.00822902	0.906969	1.00096	0.984947	1.01724
Venous thromboembolism || FinnGen-R9-I9_VTE	CD14+ CD16- monocyte %monocyte	Inverse variance weighted	22	-0.00221199	0.00750481	0.76819	0.99779	0.983221	1.01258
Venous thromboembolism || FinnGen-R9-I9_VTE	CD14+ CD16- monocyte %monocyte	Simple mode	22	0.00595781	0.0284332	0.836049	1.00598	0.951447	1.06363
Venous thromboembolism || FinnGen-R9-I9_VTE	CD14+ CD16- monocyte %monocyte	Weighted mode	22	0.00164395	0.00787641	0.836679	1.00165	0.986301	1.01723
Venous thromboembolism || FinnGen-R9-I9_VTE	CD16+ monocyte %monocyte	MR Egger	20	-0.0107963	0.041965	0.799889	0.989262	0.91115	1.07407
Venous thromboembolism || FinnGen-R9-I9_VTE	CD16+ monocyte %monocyte	Weighted median	20	-0.00462101	0.0297861	0.876711	0.99539	0.938942	1.05523
Venous thromboembolism || FinnGen-R9-I9_VTE	CD16+ monocyte %monocyte	Inverse variance weighted	20	0.0209709	0.0226791	0.355132	1.02119	0.976793	1.06761
Venous thromboembolism || FinnGen-R9-I9_VTE	CD16+ monocyte %monocyte	Simple mode	20	0.0109498	0.0523645	0.836589	1.01101	0.912393	1.12029
Venous thromboembolism || FinnGen-R9-I9_VTE	CD16+ monocyte %monocyte	Weighted mode	20	-0.0324609	0.0344579	0.357994	0.96806	0.904839	1.0357
Venous thromboembolism || FinnGen-R9-I9_VTE	Activated & resting CD4 regulatory T cell Absolute Count	MR Egger	14	0.00658042	0.0565098	0.909224	1.0066	0.901064	1.1245
Venous thromboembolism || FinnGen-R9-I9_VTE	Activated & resting CD4 regulatory T cell Absolute Count	Weighted median	14	-0.0481179	0.0345935	0.16424	0.953021	0.890545	1.01988
Venous thromboembolism || FinnGen-R9-I9_VTE	Activated & resting CD4 regulatory T cell Absolute Count	Inverse variance weighted	14	-0.0527244	0.025935	0.0420581	0.948641	0.901625	0.99811
Venous thromboembolism || FinnGen-R9-I9_VTE	Activated & resting CD4 regulatory T cell Absolute Count	Simple mode	14	-0.11798	0.0594623	0.0687656	0.888713	0.790945	0.998567
Venous thromboembolism || FinnGen-R9-I9_VTE	Activated & resting CD4 regulatory T cell Absolute Count	Weighted mode	14	-0.0667099	0.0434489	0.148667	0.935466	0.8591	1.01862
Venous thromboembolism || FinnGen-R9-I9_VTE	T/B cell	MR Egger	24	0.000623973	0.0269003	0.981703	1.00062	0.949233	1.0548
Venous thromboembolism || FinnGen-R9-I9_VTE	T/B cell	Weighted median	24	-0.00477013	0.0207107	0.817841	0.995241	0.95565	1.03647
Venous thromboembolism || FinnGen-R9-I9_VTE	T/B cell	Inverse variance weighted	24	-0.005168	0.0146271	0.723851	0.994845	0.966729	1.02378
Venous thromboembolism || FinnGen-R9-I9_VTE	T/B cell	Simple mode	24	0.0278695	0.0367301	0.4557	1.02826	0.956838	1.10502
Venous thromboembolism || FinnGen-R9-I9_VTE	T/B cell	Weighted mode	24	0.00991834	0.0265767	0.712419	1.00997	0.958705	1.06397
Venous thromboembolism || FinnGen-R9-I9_VTE	CD4+/CD8+ T cell	MR Egger	12	0.00752193	0.0713917	0.918173	1.00755	0.875985	1.15888
Venous thromboembolism || FinnGen-R9-I9_VTE	CD4+/CD8+ T cell	Weighted median	12	-0.0226366	0.0306047	0.459516	0.977618	0.920699	1.03805
Venous thromboembolism || FinnGen-R9-I9_VTE	CD4+/CD8+ T cell	Inverse variance weighted	12	-0.0222891	0.0358681	0.534324	0.977957	0.911567	1.04918
Venous thromboembolism || FinnGen-R9-I9_VTE	CD4+/CD8+ T cell	Simple mode	12	-0.0292908	0.04597	0.537048	0.971134	0.88746	1.0627
Venous thromboembolism || FinnGen-R9-I9_VTE	CD4+/CD8+ T cell	Weighted mode	12	-0.00481646	0.0349672	0.892933	0.995195	0.929274	1.06579
Venous thromboembolism || FinnGen-R9-I9_VTE	IgD+ CD38+ B cell Absolute Count	MR Egger	27	0.00760255	0.00642222	0.247631	1.00763	0.995027	1.0204
Venous thromboembolism || FinnGen-R9-I9_VTE	IgD+ CD38+ B cell Absolute Count	Weighted median	27	0.00614252	0.00767822	0.423715	1.00616	0.991133	1.02142
Venous thromboembolism || FinnGen-R9-I9_VTE	IgD+ CD38+ B cell Absolute Count	Inverse variance weighted	27	0.0064239	0.00585533	0.272596	1.00644	0.99496	1.01806
Venous thromboembolism || FinnGen-R9-I9_VTE	IgD+ CD38+ B cell Absolute Count	Simple mode	27	0.0168653	0.0213418	0.436533	1.01701	0.975344	1.06045
Venous thromboembolism || FinnGen-R9-I9_VTE	IgD+ CD38+ B cell Absolute Count	Weighted mode	27	0.00575212	0.00665383	0.395229	1.00577	0.992737	1.01897
Venous thromboembolism || FinnGen-R9-I9_VTE	IgD- CD38+ B cell %B cell	MR Egger	12	0.00978179	0.0702798	0.892068	1.00983	0.879883	1.15897
Venous thromboembolism || FinnGen-R9-I9_VTE	IgD- CD38+ B cell %B cell	Weighted median	12	0.033604	0.0349308	0.336041	1.03417	0.96574	1.10746
Venous thromboembolism || FinnGen-R9-I9_VTE	IgD- CD38+ B cell %B cell	Inverse variance weighted	12	0.0132296	0.028588	0.643531	1.01332	0.9581	1.07172
Venous thromboembolism || FinnGen-R9-I9_VTE	IgD- CD38+ B cell %B cell	Simple mode	12	0.0521813	0.0616061	0.415035	1.05357	0.933731	1.18878
Venous thromboembolism || FinnGen-R9-I9_VTE	IgD- CD38+ B cell %B cell	Weighted mode	12	0.0508906	0.0571504	0.392274	1.05221	0.940707	1.17693
Venous thromboembolism || FinnGen-R9-I9_VTE	CD4+ T cell Absolute Count	MR Egger	19	-0.0155073	0.0248922	0.541567	0.984612	0.937727	1.03384
Venous thromboembolism || FinnGen-R9-I9_VTE	CD4+ T cell Absolute Count	Weighted median	19	-0.0182884	0.0177823	0.303733	0.981878	0.948246	1.0167
Venous thromboembolism || FinnGen-R9-I9_VTE	CD4+ T cell Absolute Count	Inverse variance weighted	19	-0.0114159	0.0185232	0.537694	0.988649	0.953399	1.0252
Venous thromboembolism || FinnGen-R9-I9_VTE	CD4+ T cell Absolute Count	Simple mode	19	-0.107328	0.0438803	0.024952	0.898231	0.824207	0.978903
Venous thromboembolism || FinnGen-R9-I9_VTE	CD4+ T cell Absolute Count	Weighted mode	19	-0.012566	0.0158937	0.439457	0.987513	0.957224	1.01876
Venous thromboembolism || FinnGen-R9-I9_VTE	CD4+ T cell %T cell	MR Egger	18	-0.0288514	0.0268295	0.298162	0.971561	0.921791	1.02402
Venous thromboembolism || FinnGen-R9-I9_VTE	CD4+ T cell %T cell	Weighted median	18	-0.0338786	0.0229108	0.139216	0.966689	0.92424	1.01109
Venous thromboembolism || FinnGen-R9-I9_VTE	CD4+ T cell %T cell	Inverse variance weighted	18	-0.0202848	0.0168094	0.227529	0.97992	0.948161	1.01274
Venous thromboembolism || FinnGen-R9-I9_VTE	CD4+ T cell %T cell	Simple mode	18	-0.0128998	0.0335122	0.705062	0.987183	0.924425	1.0542
Venous thromboembolism || FinnGen-R9-I9_VTE	CD4+ T cell %T cell	Weighted mode	18	-0.0294389	0.0249181	0.253699	0.97099	0.924707	1.01959
Venous thromboembolism || FinnGen-R9-I9_VTE	CD8+ T cell Absolute Count	MR Egger	20	0.00310931	0.00923921	0.74036	1.00311	0.985112	1.02144
Venous thromboembolism || FinnGen-R9-I9_VTE	CD8+ T cell Absolute Count	Weighted median	20	0.00584926	0.00985769	0.552933	1.00587	0.986619	1.02549
Venous thromboembolism || FinnGen-R9-I9_VTE	CD8+ T cell Absolute Count	Inverse variance weighted	20	-2.47132e-05	0.00788928	0.997501	0.999975	0.984632	1.01556
Venous thromboembolism || FinnGen-R9-I9_VTE	CD8+ T cell Absolute Count	Simple mode	20	-0.00321326	0.0262723	0.903941	0.996792	0.946763	1.04946
Venous thromboembolism || FinnGen-R9-I9_VTE	CD8+ T cell Absolute Count	Weighted mode	20	0.00458888	0.00872431	0.604982	1.0046	0.987567	1.02193
Venous thromboembolism || FinnGen-R9-I9_VTE	CD8+ T cell %T cell	MR Egger	20	0.0106626	0.0314865	0.738799	1.01072	0.95023	1.07506
Venous thromboembolism || FinnGen-R9-I9_VTE	CD8+ T cell %T cell	Weighted median	20	0.0351428	0.0229026	0.12492	1.03577	0.990301	1.08332
Venous thromboembolism || FinnGen-R9-I9_VTE	CD8+ T cell %T cell	Inverse variance weighted	20	0.0317016	0.0199695	0.112399	1.03221	0.992589	1.07341
Venous thromboembolism || FinnGen-R9-I9_VTE	CD8+ T cell %T cell	Simple mode	20	0.020055	0.0332458	0.553486	1.02026	0.955895	1.08895
Venous thromboembolism || FinnGen-R9-I9_VTE	CD8+ T cell %T cell	Weighted mode	20	0.0283796	0.0195271	0.162445	1.02879	0.990155	1.06892
Venous thromboembolism || FinnGen-R9-I9_VTE	CD4+CD8+ T cell Absolute Count	MR Egger	17	0.051937	0.033903	0.146357	1.05331	0.985592	1.12568
Venous thromboembolism || FinnGen-R9-I9_VTE	CD4+CD8+ T cell Absolute Count	Weighted median	17	0.0349575	0.0252257	0.165812	1.03558	0.985619	1.08806
Venous thromboembolism || FinnGen-R9-I9_VTE	CD4+CD8+ T cell Absolute Count	Inverse variance weighted	17	0.0270582	0.018338	0.140071	1.02743	0.991155	1.06503
Venous thromboembolism || FinnGen-R9-I9_VTE	CD4+CD8+ T cell Absolute Count	Simple mode	17	0.0103923	0.0383315	0.789769	1.01045	0.937313	1.08929
Venous thromboembolism || FinnGen-R9-I9_VTE	CD4+CD8+ T cell Absolute Count	Weighted mode	17	0.0347241	0.0269598	0.216064	1.03533	0.982046	1.09151
Venous thromboembolism || FinnGen-R9-I9_VTE	CD4+CD8+ T cell %T cell	MR Egger	7	0.00141655	0.133587	0.99195	1.00142	0.770732	1.30115
Venous thromboembolism || FinnGen-R9-I9_VTE	CD4+CD8+ T cell %T cell	Weighted median	7	-0.0550269	0.0553679	0.3203	0.94646	0.849126	1.05495
Venous thromboembolism || FinnGen-R9-I9_VTE	CD4+CD8+ T cell %T cell	Inverse variance weighted	7	-0.0707608	0.0439701	0.107552	0.931685	0.854753	1.01554
Venous thromboembolism || FinnGen-R9-I9_VTE	CD4+CD8+ T cell %T cell	Simple mode	7	-0.0433657	0.0731597	0.57499	0.957561	0.829644	1.1052
Venous thromboembolism || FinnGen-R9-I9_VTE	CD4+CD8+ T cell %T cell	Weighted mode	7	-0.0542068	0.0613529	0.410953	0.947236	0.839912	1.06827
Venous thromboembolism || FinnGen-R9-I9_VTE	Activated & resting CD4 regulatory T cell %CD4 regulatory T cell	MR Egger	20	0.0128738	0.0114997	0.277649	1.01296	0.990381	1.03605
Venous thromboembolism || FinnGen-R9-I9_VTE	Activated & resting CD4 regulatory T cell %CD4 regulatory T cell	Weighted median	20	0.0167176	0.0107074	0.118448	1.01686	0.99574	1.03842
Venous thromboembolism || FinnGen-R9-I9_VTE	Activated & resting CD4 regulatory T cell %CD4 regulatory T cell	Inverse variance weighted	20	0.00875184	0.00918556	0.340701	1.00879	0.990791	1.02712
Venous thromboembolism || FinnGen-R9-I9_VTE	Activated & resting CD4 regulatory T cell %CD4 regulatory T cell	Simple mode	20	-0.00403521	0.0274299	0.884595	0.995973	0.943841	1.05098
Venous thromboembolism || FinnGen-R9-I9_VTE	Activated & resting CD4 regulatory T cell %CD4 regulatory T cell	Weighted mode	20	0.0175154	0.0101077	0.0993161	1.01767	0.997707	1.03803
Venous thromboembolism || FinnGen-R9-I9_VTE	CD8dim T cell Absolute Count	MR Egger	22	0.00619441	0.0136444	0.654725	1.00621	0.979661	1.03349
Venous thromboembolism || FinnGen-R9-I9_VTE	CD8dim T cell Absolute Count	Weighted median	22	-0.00252037	0.0139351	0.856473	0.997483	0.970607	1.0251
Venous thromboembolism || FinnGen-R9-I9_VTE	CD8dim T cell Absolute Count	Inverse variance weighted	22	-0.00652284	0.0101771	0.521568	0.993498	0.973877	1.01351
Venous thromboembolism || FinnGen-R9-I9_VTE	CD8dim T cell Absolute Count	Simple mode	22	-0.00853509	0.0223802	0.706762	0.991501	0.948949	1.03596
Venous thromboembolism || FinnGen-R9-I9_VTE	CD8dim T cell Absolute Count	Weighted mode	22	0.000927403	0.0116867	0.937501	1.00093	0.978261	1.02412
Venous thromboembolism || FinnGen-R9-I9_VTE	CD8dim T cell %T cell	MR Egger	17	-0.0151309	0.0365216	0.684518	0.984983	0.91694	1.05808
Venous thromboembolism || FinnGen-R9-I9_VTE	CD8dim T cell %T cell	Weighted median	17	-0.0127219	0.0244496	0.602832	0.987359	0.941159	1.03583
Venous thromboembolism || FinnGen-R9-I9_VTE	CD8dim T cell %T cell	Inverse variance weighted	17	-0.0166823	0.0189879	0.379631	0.983456	0.947528	1.02075
Venous thromboembolism || FinnGen-R9-I9_VTE	CD8dim T cell %T cell	Simple mode	17	-0.0251453	0.0348932	0.48153	0.975168	0.910705	1.04419
Venous thromboembolism || FinnGen-R9-I9_VTE	CD8dim T cell %T cell	Weighted mode	17	-0.0102436	0.0253602	0.691617	0.989809	0.941812	1.04025
Venous thromboembolism || FinnGen-R9-I9_VTE	CD4-CD8- T cell Absolute Count	MR Egger	20	-0.0358956	0.0449601	0.435054	0.964741	0.883364	1.05361
Venous thromboembolism || FinnGen-R9-I9_VTE	CD4-CD8- T cell Absolute Count	Weighted median	20	-0.0206942	0.0264151	0.433378	0.979518	0.930096	1.03157
Venous thromboembolism || FinnGen-R9-I9_VTE	CD4-CD8- T cell Absolute Count	Inverse variance weighted	20	0.0157606	0.0208313	0.449299	1.01589	0.975243	1.05822
Venous thromboembolism || FinnGen-R9-I9_VTE	CD4-CD8- T cell Absolute Count	Simple mode	20	-0.0208017	0.0386676	0.596849	0.979413	0.907928	1.05653
Venous thromboembolism || FinnGen-R9-I9_VTE	CD4-CD8- T cell Absolute Count	Weighted mode	20	-0.0154472	0.0307884	0.621626	0.984671	0.927009	1.04592
Venous thromboembolism || FinnGen-R9-I9_VTE	CD4-CD8- T cell %T cell	MR Egger	13	-0.0415108	0.0575091	0.48547	0.959339	0.857076	1.0738
Venous thromboembolism || FinnGen-R9-I9_VTE	CD4-CD8- T cell %T cell	Weighted median	13	-0.0189495	0.0305489	0.53506	0.981229	0.924201	1.04178
Venous thromboembolism || FinnGen-R9-I9_VTE	CD4-CD8- T cell %T cell	Inverse variance weighted	13	-0.00410562	0.0230945	0.8589	0.995903	0.951828	1.04202
Venous thromboembolism || FinnGen-R9-I9_VTE	CD4-CD8- T cell %T cell	Simple mode	13	-0.015659	0.0496732	0.757994	0.984463	0.893134	1.08513
Venous thromboembolism || FinnGen-R9-I9_VTE	CD4-CD8- T cell %T cell	Weighted mode	13	-0.0197088	0.0394763	0.626625	0.980484	0.907481	1.05936
Venous thromboembolism || FinnGen-R9-I9_VTE	IgD+ CD24+ B cell %B cell	MR Egger	12	-0.0429334	0.0480397	0.392479	0.957975	0.871891	1.05256
Venous thromboembolism || FinnGen-R9-I9_VTE	IgD+ CD24+ B cell %B cell	Weighted median	12	0.0222815	0.0336261	0.507571	1.02253	0.957312	1.09219
Venous thromboembolism || FinnGen-R9-I9_VTE	IgD+ CD24+ B cell %B cell	Inverse variance weighted	12	0.0098978	0.0250983	0.693315	1.00995	0.961467	1.06087
Venous thromboembolism || FinnGen-R9-I9_VTE	IgD+ CD24+ B cell %B cell	Simple mode	12	0.0547087	0.0528988	0.323238	1.05623	0.952207	1.17162
Venous thromboembolism || FinnGen-R9-I9_VTE	IgD+ CD24+ B cell %B cell	Weighted mode	12	0.0350925	0.0390123	0.38764	1.03572	0.959473	1.11802
Venous thromboembolism || FinnGen-R9-I9_VTE	Leukocyte Absolute Count	MR Egger	8	0.00956406	0.0174276	0.602957	1.00961	0.975706	1.04469
Venous thromboembolism || FinnGen-R9-I9_VTE	Leukocyte Absolute Count	Weighted median	8	0.0111825	0.0143742	0.436595	1.01125	0.983153	1.04014
Venous thromboembolism || FinnGen-R9-I9_VTE	Leukocyte Absolute Count	Inverse variance weighted	8	0.0120677	0.0118679	0.309233	1.01214	0.988869	1.03596
Venous thromboembolism || FinnGen-R9-I9_VTE	Leukocyte Absolute Count	Simple mode	8	0.025145	0.0325514	0.465113	1.02546	0.962082	1.09302
Venous thromboembolism || FinnGen-R9-I9_VTE	Leukocyte Absolute Count	Weighted mode	8	0.0112497	0.0126412	0.403052	1.01131	0.986564	1.03668
Venous thromboembolism || FinnGen-R9-I9_VTE	Lymphocyte Absolute Count	MR Egger	14	0.0679253	0.0346809	0.0738152	1.07029	0.999951	1.14557
Venous thromboembolism || FinnGen-R9-I9_VTE	Lymphocyte Absolute Count	Weighted median	14	0.029867	0.0314196	0.341815	1.03032	0.968782	1.09576
Venous thromboembolism || FinnGen-R9-I9_VTE	Lymphocyte Absolute Count	Inverse variance weighted	14	0.00309862	0.0258165	0.904464	1.0031	0.953609	1.05517
Venous thromboembolism || FinnGen-R9-I9_VTE	Lymphocyte Absolute Count	Simple mode	14	-0.0799932	0.0688318	0.266065	0.923123	0.806619	1.05645
Venous thromboembolism || FinnGen-R9-I9_VTE	Lymphocyte Absolute Count	Weighted mode	14	0.0358996	0.0365323	0.343701	1.03655	0.964926	1.11349
Venous thromboembolism || FinnGen-R9-I9_VTE	Lymphocyte %leukocyte	MR Egger	19	0.000378893	0.0168767	0.98235	1.00038	0.967829	1.03402
Venous thromboembolism || FinnGen-R9-I9_VTE	Lymphocyte %leukocyte	Weighted median	19	-0.0154055	0.016554	0.352052	0.984713	0.953275	1.01719
Venous thromboembolism || FinnGen-R9-I9_VTE	Lymphocyte %leukocyte	Inverse variance weighted	19	0.00570968	0.0135335	0.673103	1.00573	0.979399	1.03276
Venous thromboembolism || FinnGen-R9-I9_VTE	Lymphocyte %leukocyte	Simple mode	19	0.0448154	0.0409866	0.288628	1.04583	0.965105	1.13332
Venous thromboembolism || FinnGen-R9-I9_VTE	Lymphocyte %leukocyte	Weighted mode	19	-0.00458537	0.0133207	0.734663	0.995425	0.969772	1.02176
Venous thromboembolism || FinnGen-R9-I9_VTE	T cell Absolute Count	MR Egger	12	0.052509	0.0736605	0.492236	1.05391	0.912228	1.2176
Venous thromboembolism || FinnGen-R9-I9_VTE	T cell Absolute Count	Weighted median	12	0.035774	0.034725	0.302912	1.03642	0.968229	1.10942
Venous thromboembolism || FinnGen-R9-I9_VTE	T cell Absolute Count	Inverse variance weighted	12	0.0246796	0.0371916	0.50696	1.02499	0.952928	1.10249
Venous thromboembolism || FinnGen-R9-I9_VTE	T cell Absolute Count	Simple mode	12	0.0474726	0.0667429	0.491721	1.04862	0.920035	1.19517
Venous thromboembolism || FinnGen-R9-I9_VTE	T cell Absolute Count	Weighted mode	12	0.0508674	0.0386342	0.214731	1.05218	0.975451	1.13495
Venous thromboembolism || FinnGen-R9-I9_VTE	T cell %lymphocyte	MR Egger	13	0.0747775	0.0662424	0.28298	1.07764	0.946431	1.22705
Venous thromboembolism || FinnGen-R9-I9_VTE	T cell %lymphocyte	Weighted median	13	-0.0171134	0.0329257	0.603231	0.983032	0.921597	1.04856
Venous thromboembolism || FinnGen-R9-I9_VTE	T cell %lymphocyte	Inverse variance weighted	13	-0.00876164	0.0231053	0.704536	0.991277	0.947387	1.0372
Venous thromboembolism || FinnGen-R9-I9_VTE	T cell %lymphocyte	Simple mode	13	-0.0210017	0.0597484	0.731306	0.979217	0.871004	1.10087
Venous thromboembolism || FinnGen-R9-I9_VTE	T cell %lymphocyte	Weighted mode	13	-0.0113608	0.0455357	0.807199	0.988703	0.904285	1.081
Venous thromboembolism || FinnGen-R9-I9_VTE	IgD- CD27- B cell Absolute Count	MR Egger	20	-0.000488358	0.0388858	0.990118	0.999512	0.926163	1.07867
Venous thromboembolism || FinnGen-R9-I9_VTE	IgD- CD27- B cell Absolute Count	Weighted median	20	0.0330353	0.0244877	0.177319	1.03359	0.985151	1.0844
Venous thromboembolism || FinnGen-R9-I9_VTE	IgD- CD27- B cell Absolute Count	Inverse variance weighted	20	0.0154539	0.0179752	0.389935	1.01557	0.980417	1.05199
Venous thromboembolism || FinnGen-R9-I9_VTE	IgD- CD27- B cell Absolute Count	Simple mode	20	0.0422198	0.0358274	0.253176	1.04312	0.972387	1.11901
Venous thromboembolism || FinnGen-R9-I9_VTE	IgD- CD27- B cell Absolute Count	Weighted mode	20	0.0331854	0.0300069	0.282566	1.03374	0.974698	1.09636
Venous thromboembolism || FinnGen-R9-I9_VTE	T cell %leukocyte	MR Egger	15	-0.0151665	0.0177326	0.407877	0.984948	0.951303	1.01978
Venous thromboembolism || FinnGen-R9-I9_VTE	T cell %leukocyte	Weighted median	15	-0.0183979	0.0166273	0.268516	0.98177	0.950291	1.01429
Venous thromboembolism || FinnGen-R9-I9_VTE	T cell %leukocyte	Inverse variance weighted	15	-0.0130058	0.0138834	0.348867	0.987078	0.960581	1.01431
Venous thromboembolism || FinnGen-R9-I9_VTE	T cell %leukocyte	Simple mode	15	-0.00326364	0.0508797	0.949762	0.996742	0.902138	1.10127
Venous thromboembolism || FinnGen-R9-I9_VTE	T cell %leukocyte	Weighted mode	15	-0.0183698	0.0160388	0.271272	0.981798	0.951414	1.01315
Venous thromboembolism || FinnGen-R9-I9_VTE	CD4+ T cell %leukocyte	MR Egger	12	0.0109708	0.0668947	0.872997	1.01103	0.886794	1.15267
Venous thromboembolism || FinnGen-R9-I9_VTE	CD4+ T cell %leukocyte	Weighted median	12	-0.0192512	0.0408564	0.637503	0.980933	0.905444	1.06272
Venous thromboembolism || FinnGen-R9-I9_VTE	CD4+ T cell %leukocyte	Inverse variance weighted	12	-0.00635812	0.029653	0.830222	0.993662	0.937557	1.05312
Venous thromboembolism || FinnGen-R9-I9_VTE	CD4+ T cell %leukocyte	Simple mode	12	-0.0568131	0.0644404	0.396828	0.944771	0.832671	1.07196
Venous thromboembolism || FinnGen-R9-I9_VTE	CD4+ T cell %leukocyte	Weighted mode	12	-0.0517256	0.0590657	0.399896	0.949589	0.845781	1.06614
Venous thromboembolism || FinnGen-R9-I9_VTE	CD8+ T cell %leukocyte	MR Egger	12	0.0739747	0.0795649	0.374404	1.07678	0.921297	1.2585
Venous thromboembolism || FinnGen-R9-I9_VTE	CD8+ T cell %leukocyte	Weighted median	12	0.0145706	0.0331009	0.659802	1.01468	0.950937	1.08269
Venous thromboembolism || FinnGen-R9-I9_VTE	CD8+ T cell %leukocyte	Inverse variance weighted	12	-0.0130935	0.0322074	0.684348	0.986992	0.926612	1.05131
Venous thromboembolism || FinnGen-R9-I9_VTE	CD8+ T cell %leukocyte	Simple mode	12	0.0188841	0.0447299	0.681026	1.01906	0.933526	1.11244
Venous thromboembolism || FinnGen-R9-I9_VTE	CD8+ T cell %leukocyte	Weighted mode	12	0.0153154	0.0400804	0.709654	1.01543	0.938716	1.09842
Venous thromboembolism || FinnGen-R9-I9_VTE	CD4+CD8+ T cell %leukocyte	MR Egger	18	-0.00410598	0.0425747	0.924367	0.995902	0.916171	1.08257
Venous thromboembolism || FinnGen-R9-I9_VTE	CD4+CD8+ T cell %leukocyte	Weighted median	18	0.0127507	0.0279749	0.648542	1.01283	0.958793	1.06992
Venous thromboembolism || FinnGen-R9-I9_VTE	CD4+CD8+ T cell %leukocyte	Inverse variance weighted	18	0.0259708	0.0195699	0.184484	1.02631	0.98769	1.06644
Venous thromboembolism || FinnGen-R9-I9_VTE	CD4+CD8+ T cell %leukocyte	Simple mode	18	0.0127631	0.0430715	0.770572	1.01284	0.93085	1.10206
Venous thromboembolism || FinnGen-R9-I9_VTE	CD4+CD8+ T cell %leukocyte	Weighted mode	18	0.0217463	0.02962	0.472846	1.02198	0.964342	1.08307
Venous thromboembolism || FinnGen-R9-I9_VTE	CD4+ CD8dim T cell Absolute Count	MR Egger	13	-0.00494317	0.03961	0.902936	0.995069	0.920739	1.0754
Venous thromboembolism || FinnGen-R9-I9_VTE	CD4+ CD8dim T cell Absolute Count	Weighted median	13	-0.012356	0.0234684	0.598544	0.98772	0.943316	1.03421
Venous thromboembolism || FinnGen-R9-I9_VTE	CD4+ CD8dim T cell Absolute Count	Inverse variance weighted	13	-0.00145574	0.025358	0.95422	0.998545	0.950129	1.04943
Venous thromboembolism || FinnGen-R9-I9_VTE	CD4+ CD8dim T cell Absolute Count	Simple mode	13	-0.066515	0.0385043	0.109707	0.935649	0.867636	1.00899
Venous thromboembolism || FinnGen-R9-I9_VTE	CD4+ CD8dim T cell Absolute Count	Weighted mode	13	-0.0109029	0.0219137	0.627801	0.989156	0.947571	1.03257
Venous thromboembolism || FinnGen-R9-I9_VTE	IgD+ CD24+ B cell Absolute Count	MR Egger	18	0.041236	0.0725627	0.577733	1.0421	0.903945	1.20137
Venous thromboembolism || FinnGen-R9-I9_VTE	IgD+ CD24+ B cell Absolute Count	Weighted median	18	0.0151128	0.0311434	0.627489	1.01523	0.95511	1.07913
Venous thromboembolism || FinnGen-R9-I9_VTE	IgD+ CD24+ B cell Absolute Count	Inverse variance weighted	18	-0.0137975	0.0225702	0.540991	0.986297	0.943617	1.03091
Venous thromboembolism || FinnGen-R9-I9_VTE	IgD+ CD24+ B cell Absolute Count	Simple mode	18	0.0212387	0.0474657	0.660197	1.02147	0.930723	1.12106
Venous thromboembolism || FinnGen-R9-I9_VTE	IgD+ CD24+ B cell Absolute Count	Weighted mode	18	0.0212387	0.0440131	0.635568	1.02147	0.937042	1.1135
Venous thromboembolism || FinnGen-R9-I9_VTE	CD4+ CD8dim T cell %lymphocyte	MR Egger	16	0.0778643	0.0406628	0.0761663	1.08098	0.998167	1.17065
Venous thromboembolism || FinnGen-R9-I9_VTE	CD4+ CD8dim T cell %lymphocyte	Weighted median	16	0.044934	0.0301563	0.136215	1.04596	0.985928	1.10965
Venous thromboembolism || FinnGen-R9-I9_VTE	CD4+ CD8dim T cell %lymphocyte	Inverse variance weighted	16	0.02724	0.0223221	0.222345	1.02761	0.983624	1.07357
Venous thromboembolism || FinnGen-R9-I9_VTE	CD4+ CD8dim T cell %lymphocyte	Simple mode	16	0.0451542	0.0477674	0.359489	1.04619	0.952686	1.14887
Venous thromboembolism || FinnGen-R9-I9_VTE	CD4+ CD8dim T cell %lymphocyte	Weighted mode	16	0.0464069	0.0343027	0.19614	1.0475	0.979389	1.12035
Venous thromboembolism || FinnGen-R9-I9_VTE	CD4+ CD8dim T cell %leukocyte	MR Egger	12	0.123675	0.0988344	0.239291	1.13165	0.932357	1.37354
Venous thromboembolism || FinnGen-R9-I9_VTE	CD4+ CD8dim T cell %leukocyte	Weighted median	12	0.0408777	0.0393588	0.298995	1.04172	0.964384	1.12527
Venous thromboembolism || FinnGen-R9-I9_VTE	CD4+ CD8dim T cell %leukocyte	Inverse variance weighted	12	0.0253516	0.0310888	0.414811	1.02568	0.965043	1.09012
Venous thromboembolism || FinnGen-R9-I9_VTE	CD4+ CD8dim T cell %leukocyte	Simple mode	12	0.055213	0.0601233	0.378143	1.05677	0.939292	1.18893
Venous thromboembolism || FinnGen-R9-I9_VTE	CD4+ CD8dim T cell %leukocyte	Weighted mode	12	0.0509996	0.0534962	0.360901	1.05232	0.947572	1.16865
Venous thromboembolism || FinnGen-R9-I9_VTE	CD8dim T cell %leukocyte	MR Egger	16	-0.00844364	0.0202083	0.682408	0.991592	0.953084	1.03166
Venous thromboembolism || FinnGen-R9-I9_VTE	CD8dim T cell %leukocyte	Weighted median	16	-0.00584748	0.0201261	0.771401	0.99417	0.955716	1.03417
Venous thromboembolism || FinnGen-R9-I9_VTE	CD8dim T cell %leukocyte	Inverse variance weighted	16	-0.0161394	0.0145455	0.267182	0.98399	0.956333	1.01245
Venous thromboembolism || FinnGen-R9-I9_VTE	CD8dim T cell %leukocyte	Simple mode	16	-0.0193624	0.029349	0.519429	0.980824	0.925995	1.0389
Venous thromboembolism || FinnGen-R9-I9_VTE	CD8dim T cell %leukocyte	Weighted mode	16	-0.00702672	0.018231	0.705331	0.992998	0.958142	1.02912
Venous thromboembolism || FinnGen-R9-I9_VTE	CD4-CD8- T cell %leukocyte	MR Egger	19	-0.00585829	0.0116738	0.622222	0.994159	0.97167	1.01717
Venous thromboembolism || FinnGen-R9-I9_VTE	CD4-CD8- T cell %leukocyte	Weighted median	19	-0.00185789	0.0121952	0.878915	0.998144	0.974568	1.02229
Venous thromboembolism || FinnGen-R9-I9_VTE	CD4-CD8- T cell %leukocyte	Inverse variance weighted	19	-0.00407284	0.00962191	0.672085	0.995935	0.977329	1.0149
Venous thromboembolism || FinnGen-R9-I9_VTE	CD4-CD8- T cell %leukocyte	Simple mode	19	-0.0272334	0.0244367	0.279746	0.973134	0.927624	1.02088
Venous thromboembolism || FinnGen-R9-I9_VTE	CD4-CD8- T cell %leukocyte	Weighted mode	19	-0.00303705	0.0111725	0.788843	0.996968	0.975373	1.01904
Venous thromboembolism || FinnGen-R9-I9_VTE	Activated & resting CD4 regulatory T cell %CD4+ T cell	MR Egger	22	0.00301395	0.0234861	0.89917	1.00302	0.957893	1.05027
Venous thromboembolism || FinnGen-R9-I9_VTE	Activated & resting CD4 regulatory T cell %CD4+ T cell	Weighted median	22	-0.00529852	0.0209196	0.800052	0.994715	0.954755	1.03635
Venous thromboembolism || FinnGen-R9-I9_VTE	Activated & resting CD4 regulatory T cell %CD4+ T cell	Inverse variance weighted	22	-0.000730507	0.0151694	0.961591	0.99927	0.969997	1.02943
Venous thromboembolism || FinnGen-R9-I9_VTE	Activated & resting CD4 regulatory T cell %CD4+ T cell	Simple mode	22	0.00202812	0.0382708	0.958238	1.00203	0.929617	1.08008
Venous thromboembolism || FinnGen-R9-I9_VTE	Activated & resting CD4 regulatory T cell %CD4+ T cell	Weighted mode	22	-0.0139774	0.0241689	0.569199	0.98612	0.940495	1.03396
Venous thromboembolism || FinnGen-R9-I9_VTE	CD8+ and CD8dim T cell %leukocyte	MR Egger	13	-0.0139347	0.0738473	0.853767	0.986162	0.853273	1.13975
Venous thromboembolism || FinnGen-R9-I9_VTE	CD8+ and CD8dim T cell %leukocyte	Weighted median	13	0.0088179	0.034177	0.796402	1.00886	0.943491	1.07875
Venous thromboembolism || FinnGen-R9-I9_VTE	CD8+ and CD8dim T cell %leukocyte	Inverse variance weighted	13	0.00209784	0.0269705	0.938001	1.0021	0.950503	1.0565
Venous thromboembolism || FinnGen-R9-I9_VTE	CD8+ and CD8dim T cell %leukocyte	Simple mode	13	-0.00153278	0.0593512	0.979821	0.998468	0.88882	1.12164
Venous thromboembolism || FinnGen-R9-I9_VTE	CD8+ and CD8dim T cell %leukocyte	Weighted mode	13	0.0102946	0.0538076	0.851472	1.01035	0.90922	1.12272
Venous thromboembolism || FinnGen-R9-I9_VTE	TCRgd T cell Absolute Count	MR Egger	18	0.0260759	0.0268663	0.346203	1.02642	0.973768	1.08192
Venous thromboembolism || FinnGen-R9-I9_VTE	TCRgd T cell Absolute Count	Weighted median	18	0.0109399	0.0241717	0.650842	1.011	0.964219	1.06005
Venous thromboembolism || FinnGen-R9-I9_VTE	TCRgd T cell Absolute Count	Inverse variance weighted	18	-0.000960303	0.0171904	0.955451	0.99904	0.96594	1.03327
Venous thromboembolism || FinnGen-R9-I9_VTE	TCRgd T cell Absolute Count	Simple mode	18	-0.0446743	0.0513346	0.396282	0.956309	0.864771	1.05754
Venous thromboembolism || FinnGen-R9-I9_VTE	TCRgd T cell Absolute Count	Weighted mode	18	0.027371	0.0239627	0.269189	1.02775	0.980595	1.07717
Venous thromboembolism || FinnGen-R9-I9_VTE	TCRgd T cell %T cell	MR Egger	15	0.0140685	0.0152426	0.372833	1.01417	0.984317	1.04492
Venous thromboembolism || FinnGen-R9-I9_VTE	TCRgd T cell %T cell	Weighted median	15	0.0128211	0.0129095	0.320638	1.0129	0.987596	1.03886
Venous thromboembolism || FinnGen-R9-I9_VTE	TCRgd T cell %T cell	Inverse variance weighted	15	0.00999059	0.0125334	0.425382	1.01004	0.985531	1.03516
Venous thromboembolism || FinnGen-R9-I9_VTE	TCRgd T cell %T cell	Simple mode	15	-0.00499267	0.0494224	0.920967	0.99502	0.903155	1.09623
Venous thromboembolism || FinnGen-R9-I9_VTE	TCRgd T cell %T cell	Weighted mode	15	0.0129692	0.0116923	0.286031	1.01305	0.990102	1.03654
Venous thromboembolism || FinnGen-R9-I9_VTE	TCRgd T cell %lymphocyte	MR Egger	16	0.00427804	0.00953402	0.660506	1.00429	0.985695	1.02323
Venous thromboembolism || FinnGen-R9-I9_VTE	TCRgd T cell %lymphocyte	Weighted median	16	0.00145666	0.0124721	0.907024	1.00146	0.977274	1.02624
Venous thromboembolism || FinnGen-R9-I9_VTE	TCRgd T cell %lymphocyte	Inverse variance weighted	16	0.000688671	0.00818739	0.932966	1.00069	0.984759	1.01688
Venous thromboembolism || FinnGen-R9-I9_VTE	TCRgd T cell %lymphocyte	Simple mode	16	-0.0141399	0.0261624	0.596808	0.98596	0.936676	1.03784
Venous thromboembolism || FinnGen-R9-I9_VTE	TCRgd T cell %lymphocyte	Weighted mode	16	0.00251416	0.00884657	0.780146	1.00252	0.985284	1.02005
Venous thromboembolism || FinnGen-R9-I9_VTE	HLA DR+ T cell Absolute Count	MR Egger	25	-0.00550979	0.0123059	0.658534	0.994505	0.970805	1.01878
Venous thromboembolism || FinnGen-R9-I9_VTE	HLA DR+ T cell Absolute Count	Weighted median	25	0.00336847	0.0123204	0.784542	1.00337	0.979435	1.0279
Venous thromboembolism || FinnGen-R9-I9_VTE	HLA DR+ T cell Absolute Count	Inverse variance weighted	25	0.00756628	0.00870235	0.384599	1.00759	0.990555	1.02493
Venous thromboembolism || FinnGen-R9-I9_VTE	HLA DR+ T cell Absolute Count	Simple mode	25	0.027913	0.0203892	0.183675	1.02831	0.988022	1.07023
Venous thromboembolism || FinnGen-R9-I9_VTE	HLA DR+ T cell Absolute Count	Weighted mode	25	0.0026461	0.0103084	0.799604	1.00265	0.982595	1.02311
Venous thromboembolism || FinnGen-R9-I9_VTE	HLA DR+ T cell%T cell	MR Egger	29	0.0268336	0.0101097	0.0131619	1.0272	1.00704	1.04775
Venous thromboembolism || FinnGen-R9-I9_VTE	HLA DR+ T cell%T cell	Weighted median	29	0.0187207	0.010085	0.0634126	1.0189	0.998955	1.03924
Venous thromboembolism || FinnGen-R9-I9_VTE	HLA DR+ T cell%T cell	Inverse variance weighted	29	0.0150999	0.00821198	0.065949	1.01521	0.999005	1.03169
Venous thromboembolism || FinnGen-R9-I9_VTE	HLA DR+ T cell%T cell	Simple mode	29	0.0336195	0.0146446	0.0293902	1.03419	1.00493	1.06431
Venous thromboembolism || FinnGen-R9-I9_VTE	HLA DR+ T cell%T cell	Weighted mode	29	0.0226189	0.00912948	0.0195294	1.02288	1.00474	1.04134
Venous thromboembolism || FinnGen-R9-I9_VTE	IgD- CD24- B cell %B cell	MR Egger	14	0.000369998	0.0155769	0.98144	1.00037	0.97029	1.03138
Venous thromboembolism || FinnGen-R9-I9_VTE	IgD- CD24- B cell %B cell	Weighted median	14	-0.00457293	0.0169911	0.787825	0.995438	0.962833	1.02915
Venous thromboembolism || FinnGen-R9-I9_VTE	IgD- CD24- B cell %B cell	Inverse variance weighted	14	-0.00179899	0.0123849	0.884508	0.998203	0.974264	1.02273
Venous thromboembolism || FinnGen-R9-I9_VTE	IgD- CD24- B cell %B cell	Simple mode	14	0.00419787	0.0251472	0.869992	1.00421	0.955911	1.05494
Venous thromboembolism || FinnGen-R9-I9_VTE	IgD- CD24- B cell %B cell	Weighted mode	14	-0.00574713	0.0166707	0.735799	0.994269	0.962307	1.02729
Venous thromboembolism || FinnGen-R9-I9_VTE	HLA DR+ T cell%lymphocyte	MR Egger	23	0.0439911	0.0145486	0.00646141	1.04497	1.0156	1.0752
Venous thromboembolism || FinnGen-R9-I9_VTE	HLA DR+ T cell%lymphocyte	Weighted median	23	0.034034	0.0132119	0.00999461	1.03462	1.00817	1.06176
Venous thromboembolism || FinnGen-R9-I9_VTE	HLA DR+ T cell%lymphocyte	Inverse variance weighted	23	0.0260608	0.0104348	0.0125079	1.0264	1.00562	1.04761
Venous thromboembolism || FinnGen-R9-I9_VTE	HLA DR+ T cell%lymphocyte	Simple mode	23	0.0471421	0.0202647	0.0296103	1.04827	1.00745	1.09074
Venous thromboembolism || FinnGen-R9-I9_VTE	HLA DR+ T cell%lymphocyte	Weighted mode	23	0.0330931	0.0124299	0.0142283	1.03365	1.00877	1.05914
Venous thromboembolism || FinnGen-R9-I9_VTE	Natural Killer T Absolute Count	MR Egger	31	0.00347351	0.0257438	0.893602	1.00348	0.954102	1.05541
Venous thromboembolism || FinnGen-R9-I9_VTE	Natural Killer T Absolute Count	Weighted median	31	0.0235166	0.019859	0.236343	1.0238	0.984711	1.06443
Venous thromboembolism || FinnGen-R9-I9_VTE	Natural Killer T Absolute Count	Inverse variance weighted	31	0.00645737	0.0152046	0.671057	1.00648	0.976927	1.03692
Venous thromboembolism || FinnGen-R9-I9_VTE	Natural Killer T Absolute Count	Simple mode	31	0.0223189	0.0361047	0.541127	1.02257	0.952709	1.09755
Venous thromboembolism || FinnGen-R9-I9_VTE	Natural Killer T Absolute Count	Weighted mode	31	0.0374572	0.0228957	0.11229	1.03817	0.992609	1.08582
Venous thromboembolism || FinnGen-R9-I9_VTE	Natural Killer T %T cell	MR Egger	28	-0.0176984	0.0225143	0.438918	0.982457	0.940046	1.02678
Venous thromboembolism || FinnGen-R9-I9_VTE	Natural Killer T %T cell	Weighted median	28	-0.00282626	0.0178332	0.874076	0.997178	0.962925	1.03265
Venous thromboembolism || FinnGen-R9-I9_VTE	Natural Killer T %T cell	Inverse variance weighted	28	-0.0161181	0.0150782	0.285084	0.984011	0.955356	1.01353
Venous thromboembolism || FinnGen-R9-I9_VTE	Natural Killer T %T cell	Simple mode	28	-0.0200136	0.0331283	0.550804	0.980185	0.918563	1.04594
Venous thromboembolism || FinnGen-R9-I9_VTE	Natural Killer T %T cell	Weighted mode	28	-0.00614254	0.0177493	0.731972	0.993876	0.959895	1.02906
Venous thromboembolism || FinnGen-R9-I9_VTE	Activated & secreting CD4 regulatory T cell Absolute Count	MR Egger	18	0.000669116	0.00762409	0.931154	1.00067	0.985827	1.01573
Venous thromboembolism || FinnGen-R9-I9_VTE	Activated & secreting CD4 regulatory T cell Absolute Count	Weighted median	18	-0.00467627	0.00735563	0.524946	0.995335	0.981088	1.00979
Venous thromboembolism || FinnGen-R9-I9_VTE	Activated & secreting CD4 regulatory T cell Absolute Count	Inverse variance weighted	18	0.001244	0.00571761	0.827762	1.00124	0.990087	1.01253
Venous thromboembolism || FinnGen-R9-I9_VTE	Activated & secreting CD4 regulatory T cell Absolute Count	Simple mode	18	-0.0014376	0.0132819	0.915075	0.998563	0.972904	1.0249
Venous thromboembolism || FinnGen-R9-I9_VTE	Activated & secreting CD4 regulatory T cell Absolute Count	Weighted mode	18	-0.0014376	0.00606801	0.815554	0.998563	0.986758	1.01051
Venous thromboembolism || FinnGen-R9-I9_VTE	Natural Killer T %lymphocyte	MR Egger	27	-0.0133082	0.0226518	0.562129	0.98678	0.943928	1.03158
Venous thromboembolism || FinnGen-R9-I9_VTE	Natural Killer T %lymphocyte	Weighted median	27	-0.00218033	0.0190933	0.909085	0.997822	0.961171	1.03587
Venous thromboembolism || FinnGen-R9-I9_VTE	Natural Killer T %lymphocyte	Inverse variance weighted	27	-0.0114111	0.0153254	0.456522	0.988654	0.959398	1.0188
Venous thromboembolism || FinnGen-R9-I9_VTE	Natural Killer T %lymphocyte	Simple mode	27	0.000985072	0.0359867	0.978371	1.00099	0.932814	1.07414
Venous thromboembolism || FinnGen-R9-I9_VTE	Natural Killer T %lymphocyte	Weighted mode	27	-0.000594682	0.0175109	0.973168	0.999405	0.965686	1.0343
Venous thromboembolism || FinnGen-R9-I9_VTE	HLA DR+ CD4+ T cell Absolute Count	MR Egger	21	-0.0340696	0.0177998	0.0707982	0.966504	0.933367	1.00082
Venous thromboembolism || FinnGen-R9-I9_VTE	HLA DR+ CD4+ T cell Absolute Count	Weighted median	21	-0.0296917	0.0141331	0.035653	0.970745	0.944223	0.998011
Venous thromboembolism || FinnGen-R9-I9_VTE	HLA DR+ CD4+ T cell Absolute Count	Inverse variance weighted	21	-0.0265267	0.0135927	0.0509922	0.973822	0.94822	1.00011
Venous thromboembolism || FinnGen-R9-I9_VTE	HLA DR+ CD4+ T cell Absolute Count	Simple mode	21	-0.0426733	0.030383	0.175507	0.958224	0.902827	1.01702
Venous thromboembolism || FinnGen-R9-I9_VTE	HLA DR+ CD4+ T cell Absolute Count	Weighted mode	21	-0.0345654	0.0113584	0.00641991	0.966025	0.944757	0.987772
Venous thromboembolism || FinnGen-R9-I9_VTE	HLA DR+ CD4+ T cell %T cell	MR Egger	22	0.0653249	0.0349032	0.0759618	1.06751	0.996919	1.14309
Venous thromboembolism || FinnGen-R9-I9_VTE	HLA DR+ CD4+ T cell %T cell	Weighted median	22	0.042529	0.0284784	0.135338	1.04345	0.986799	1.10335
Venous thromboembolism || FinnGen-R9-I9_VTE	HLA DR+ CD4+ T cell %T cell	Inverse variance weighted	22	0.0319733	0.0202331	0.114051	1.03249	0.992346	1.07426
Venous thromboembolism || FinnGen-R9-I9_VTE	HLA DR+ CD4+ T cell %T cell	Simple mode	22	-0.0231334	0.0532217	0.668242	0.977132	0.880339	1.08457
Venous thromboembolism || FinnGen-R9-I9_VTE	HLA DR+ CD4+ T cell %T cell	Weighted mode	22	0.0551771	0.0318842	0.0982025	1.05673	0.992711	1.12487
Venous thromboembolism || FinnGen-R9-I9_VTE	HLA DR+ CD4+ T cell %lymphocyte	MR Egger	19	-0.0300452	0.0474576	0.535096	0.970402	0.884209	1.065
Venous thromboembolism || FinnGen-R9-I9_VTE	HLA DR+ CD4+ T cell %lymphocyte	Weighted median	19	-0.00341773	0.0285435	0.904691	0.996588	0.942365	1.05393
Venous thromboembolism || FinnGen-R9-I9_VTE	HLA DR+ CD4+ T cell %lymphocyte	Inverse variance weighted	19	0.00483449	0.0217053	0.823743	1.00485	0.962994	1.04852
Venous thromboembolism || FinnGen-R9-I9_VTE	HLA DR+ CD4+ T cell %lymphocyte	Simple mode	19	-0.0228894	0.0415518	0.588499	0.977371	0.900927	1.0603
Venous thromboembolism || FinnGen-R9-I9_VTE	HLA DR+ CD4+ T cell %lymphocyte	Weighted mode	19	0.000750827	0.0314013	0.981187	1.00075	0.941016	1.06428
Venous thromboembolism || FinnGen-R9-I9_VTE	HLA DR+ CD8+ T cell Absolute Count	MR Egger	32	0.0133279	0.0112668	0.246125	1.01342	0.991283	1.03605
Venous thromboembolism || FinnGen-R9-I9_VTE	HLA DR+ CD8+ T cell Absolute Count	Weighted median	32	0.00883685	0.012341	0.473956	1.00888	0.984766	1.03358
Venous thromboembolism || FinnGen-R9-I9_VTE	HLA DR+ CD8+ T cell Absolute Count	Inverse variance weighted	32	0.00616364	0.00815946	0.45001	1.00618	0.990219	1.0224
Venous thromboembolism || FinnGen-R9-I9_VTE	HLA DR+ CD8+ T cell Absolute Count	Simple mode	32	0.0229166	0.021974	0.305062	1.02318	0.980049	1.06821
Venous thromboembolism || FinnGen-R9-I9_VTE	HLA DR+ CD8+ T cell Absolute Count	Weighted mode	32	0.010945	0.0101523	0.289318	1.01101	0.991086	1.03132
Venous thromboembolism || FinnGen-R9-I9_VTE	HLA DR+ CD8+ T cell %T cell	MR Egger	22	0.0258187	0.0131646	0.0639254	1.02615	1.00002	1.05298
Venous thromboembolism || FinnGen-R9-I9_VTE	HLA DR+ CD8+ T cell %T cell	Weighted median	22	0.0244343	0.0125169	0.0509267	1.02474	0.999901	1.05019
Venous thromboembolism || FinnGen-R9-I9_VTE	HLA DR+ CD8+ T cell %T cell	Inverse variance weighted	22	0.0105272	0.0103674	0.309909	1.01058	0.990255	1.03133
Venous thromboembolism || FinnGen-R9-I9_VTE	HLA DR+ CD8+ T cell %T cell	Simple mode	22	0.02929	0.0240293	0.236388	1.02972	0.98235	1.07938
Venous thromboembolism || FinnGen-R9-I9_VTE	HLA DR+ CD8+ T cell %T cell	Weighted mode	22	0.0173238	0.0103415	0.108729	1.01747	0.997059	1.03831
Venous thromboembolism || FinnGen-R9-I9_VTE	HLA DR+ CD8+ T cell %lymphocyte	MR Egger	24	0.0456582	0.0213132	0.0434946	1.04672	1.00389	1.09137
Venous thromboembolism || FinnGen-R9-I9_VTE	HLA DR+ CD8+ T cell %lymphocyte	Weighted median	24	0.0297789	0.0181524	0.100903	1.03023	0.994217	1.06754
Venous thromboembolism || FinnGen-R9-I9_VTE	HLA DR+ CD8+ T cell %lymphocyte	Inverse variance weighted	24	0.0132916	0.0140068	0.342653	1.01338	0.985938	1.04159
Venous thromboembolism || FinnGen-R9-I9_VTE	HLA DR+ CD8+ T cell %lymphocyte	Simple mode	24	0.0394199	0.0273199	0.16253	1.04021	0.985972	1.09743
Venous thromboembolism || FinnGen-R9-I9_VTE	HLA DR+ CD8+ T cell %lymphocyte	Weighted mode	24	0.0301625	0.016815	0.0860063	1.03062	0.997209	1.06515
Venous thromboembolism || FinnGen-R9-I9_VTE	IgD- CD24- B cell Absolute Count	MR Egger	16	0.00439163	0.0281988	0.878463	1.0044	0.950395	1.06148
Venous thromboembolism || FinnGen-R9-I9_VTE	IgD- CD24- B cell Absolute Count	Weighted median	16	0.0190247	0.0243869	0.43532	1.01921	0.971636	1.06911
Venous thromboembolism || FinnGen-R9-I9_VTE	IgD- CD24- B cell Absolute Count	Inverse variance weighted	16	0.00174595	0.0183912	0.924367	1.00175	0.966281	1.03852
Venous thromboembolism || FinnGen-R9-I9_VTE	IgD- CD24- B cell Absolute Count	Simple mode	16	0.0137753	0.0345476	0.695708	1.01387	0.947491	1.0849
Venous thromboembolism || FinnGen-R9-I9_VTE	IgD- CD24- B cell Absolute Count	Weighted mode	16	0.0153854	0.0297962	0.613134	1.0155	0.957897	1.07658
Venous thromboembolism || FinnGen-R9-I9_VTE	CD8+ Natural Killer T Absolute Count	MR Egger	20	-0.0180054	0.0624346	0.776345	0.982156	0.86903	1.11001
Venous thromboembolism || FinnGen-R9-I9_VTE	CD8+ Natural Killer T Absolute Count	Weighted median	20	0.0384282	0.0302148	0.203433	1.03918	0.979422	1.10258
Venous thromboembolism || FinnGen-R9-I9_VTE	CD8+ Natural Killer T Absolute Count	Inverse variance weighted	20	0.0298202	0.0272555	0.273912	1.03027	0.976676	1.0868
Venous thromboembolism || FinnGen-R9-I9_VTE	CD8+ Natural Killer T Absolute Count	Simple mode	20	0.0421834	0.0428433	0.337195	1.04309	0.959072	1.13446
Venous thromboembolism || FinnGen-R9-I9_VTE	CD8+ Natural Killer T Absolute Count	Weighted mode	20	0.0508374	0.0409234	0.229257	1.05215	0.971055	1.14002
Venous thromboembolism || FinnGen-R9-I9_VTE	CD8+ Natural Killer T %T cell	MR Egger	23	0.0028285	0.0364636	0.938904	1.00283	0.933663	1.07713
Venous thromboembolism || FinnGen-R9-I9_VTE	CD8+ Natural Killer T %T cell	Weighted median	23	0.000767206	0.0261849	0.976626	1.00077	0.950701	1.05347
Venous thromboembolism || FinnGen-R9-I9_VTE	CD8+ Natural Killer T %T cell	Inverse variance weighted	23	-0.00796026	0.0184514	0.666165	0.992071	0.956834	1.02861
Venous thromboembolism || FinnGen-R9-I9_VTE	CD8+ Natural Killer T %T cell	Simple mode	23	0.00918286	0.0397775	0.81956	1.00923	0.933531	1.09106
Venous thromboembolism || FinnGen-R9-I9_VTE	CD8+ Natural Killer T %T cell	Weighted mode	23	0.0183487	0.0339692	0.594515	1.01852	0.952914	1.08864
Venous thromboembolism || FinnGen-R9-I9_VTE	Activated & secreting CD4 regulatory T cell %CD4 regulatory T cell	MR Egger	34	-0.00229141	0.00551162	0.680374	0.997711	0.986991	1.00855
Venous thromboembolism || FinnGen-R9-I9_VTE	Activated & secreting CD4 regulatory T cell %CD4 regulatory T cell	Weighted median	34	-0.00123314	0.00603657	0.838136	0.998768	0.98702	1.01065
Venous thromboembolism || FinnGen-R9-I9_VTE	Activated & secreting CD4 regulatory T cell %CD4 regulatory T cell	Inverse variance weighted	34	-0.000709793	0.004468	0.873778	0.99929	0.990578	1.00808
Venous thromboembolism || FinnGen-R9-I9_VTE	Activated & secreting CD4 regulatory T cell %CD4 regulatory T cell	Simple mode	34	-0.0119116	0.0100564	0.244686	0.988159	0.968873	1.00783
Venous thromboembolism || FinnGen-R9-I9_VTE	Activated & secreting CD4 regulatory T cell %CD4 regulatory T cell	Weighted mode	34	-0.00183129	0.00472614	0.700889	0.99817	0.988967	1.00746
Venous thromboembolism || FinnGen-R9-I9_VTE	CD8+ Natural Killer T %lymphocyte	MR Egger	21	0.00374156	0.0388641	0.924312	1.00375	0.930129	1.0832
Venous thromboembolism || FinnGen-R9-I9_VTE	CD8+ Natural Killer T %lymphocyte	Weighted median	21	-0.00738775	0.0299408	0.805106	0.992639	0.936064	1.05263
Venous thromboembolism || FinnGen-R9-I9_VTE	CD8+ Natural Killer T %lymphocyte	Inverse variance weighted	21	-0.0146338	0.0199328	0.462855	0.985473	0.947714	1.02474
Venous thromboembolism || FinnGen-R9-I9_VTE	CD8+ Natural Killer T %lymphocyte	Simple mode	21	-0.0282575	0.049572	0.575006	0.972138	0.882128	1.07133
Venous thromboembolism || FinnGen-R9-I9_VTE	CD8+ Natural Killer T %lymphocyte	Weighted mode	21	0.0157772	0.0358198	0.664328	1.0159	0.947025	1.08979
Venous thromboembolism || FinnGen-R9-I9_VTE	CD8dim Natural Killer T Absolute Count	MR Egger	23	0.00494928	0.0166562	0.769276	1.00496	0.972683	1.03831
Venous thromboembolism || FinnGen-R9-I9_VTE	CD8dim Natural Killer T Absolute Count	Weighted median	23	-0.00405984	0.01786	0.820179	0.995948	0.961688	1.03143
Venous thromboembolism || FinnGen-R9-I9_VTE	CD8dim Natural Killer T Absolute Count	Inverse variance weighted	23	-0.01099	0.0122397	0.369242	0.98907	0.965625	1.01308
Venous thromboembolism || FinnGen-R9-I9_VTE	CD8dim Natural Killer T Absolute Count	Simple mode	23	-0.00593706	0.0269173	0.827464	0.994081	0.942994	1.04793
Venous thromboembolism || FinnGen-R9-I9_VTE	CD8dim Natural Killer T Absolute Count	Weighted mode	23	-0.00382443	0.0168923	0.82298	0.996183	0.96374	1.02972
Venous thromboembolism || FinnGen-R9-I9_VTE	CD8dim Natural Killer T %T cell	MR Egger	16	0.00190324	0.0261508	0.943011	1.00191	0.951846	1.0546
Venous thromboembolism || FinnGen-R9-I9_VTE	CD8dim Natural Killer T %T cell	Weighted median	16	0.0117402	0.022254	0.597808	1.01181	0.968625	1.05692
Venous thromboembolism || FinnGen-R9-I9_VTE	CD8dim Natural Killer T %T cell	Inverse variance weighted	16	-0.00196711	0.0150968	0.896329	0.998035	0.968936	1.02801
Venous thromboembolism || FinnGen-R9-I9_VTE	CD8dim Natural Killer T %T cell	Simple mode	16	0.0125006	0.0341362	0.719331	1.01258	0.947047	1.08265
Venous thromboembolism || FinnGen-R9-I9_VTE	CD8dim Natural Killer T %T cell	Weighted mode	16	0.0172283	0.0307348	0.583383	1.01738	0.9579	1.08055
Venous thromboembolism || FinnGen-R9-I9_VTE	CD8dim Natural Killer T %lymphocyte	MR Egger	23	0.0118687	0.023839	0.623749	1.01194	0.965745	1.06034
Venous thromboembolism || FinnGen-R9-I9_VTE	CD8dim Natural Killer T %lymphocyte	Weighted median	23	0.00543143	0.0201147	0.787142	1.00545	0.966578	1.04588
Venous thromboembolism || FinnGen-R9-I9_VTE	CD8dim Natural Killer T %lymphocyte	Inverse variance weighted	23	-0.00741499	0.0138245	0.591707	0.992612	0.966078	1.01988
Venous thromboembolism || FinnGen-R9-I9_VTE	CD8dim Natural Killer T %lymphocyte	Simple mode	23	0.00163459	0.035584	0.963776	1.00164	0.934158	1.07399
Venous thromboembolism || FinnGen-R9-I9_VTE	CD8dim Natural Killer T %lymphocyte	Weighted mode	23	0.00865902	0.0262411	0.744537	1.0087	0.958128	1.06193
Venous thromboembolism || FinnGen-R9-I9_VTE	CD4-CD8- Natural Killer T Absolute Count	MR Egger	7	0.0285587	0.171217	0.874064	1.02897	0.735631	1.43928
Venous thromboembolism || FinnGen-R9-I9_VTE	CD4-CD8- Natural Killer T Absolute Count	Weighted median	7	0.015006	0.0469555	0.749288	1.01512	0.925865	1.11298
Venous thromboembolism || FinnGen-R9-I9_VTE	CD4-CD8- Natural Killer T Absolute Count	Inverse variance weighted	7	0.00267031	0.0390856	0.945531	1.00267	0.92873	1.08251
Venous thromboembolism || FinnGen-R9-I9_VTE	CD4-CD8- Natural Killer T Absolute Count	Simple mode	7	0.00511033	0.0720342	0.945749	1.00512	0.872776	1.15754
Venous thromboembolism || FinnGen-R9-I9_VTE	CD4-CD8- Natural Killer T Absolute Count	Weighted mode	7	0.0146112	0.060763	0.817978	1.01472	0.900789	1.14306
Venous thromboembolism || FinnGen-R9-I9_VTE	CD4-CD8- Natural Killer T %T cell	MR Egger	26	-0.0427871	0.028893	0.151648	0.958115	0.905365	1.01394
Venous thromboembolism || FinnGen-R9-I9_VTE	CD4-CD8- Natural Killer T %T cell	Weighted median	26	-0.0319326	0.0219607	0.145924	0.968572	0.927766	1.01117
Venous thromboembolism || FinnGen-R9-I9_VTE	CD4-CD8- Natural Killer T %T cell	Inverse variance weighted	26	-0.0182526	0.0155269	0.239775	0.981913	0.952481	1.01225
Venous thromboembolism || FinnGen-R9-I9_VTE	CD4-CD8- Natural Killer T %T cell	Simple mode	26	-0.0236724	0.0362544	0.519746	0.976606	0.909618	1.04853
Venous thromboembolism || FinnGen-R9-I9_VTE	CD4-CD8- Natural Killer T %T cell	Weighted mode	26	-0.0316322	0.0295681	0.294926	0.968863	0.91431	1.02667
Venous thromboembolism || FinnGen-R9-I9_VTE	CD4-CD8- Natural Killer T %lymphocyte	MR Egger	25	-0.0807762	0.0315819	0.0175961	0.9224	0.867034	0.981301
Venous thromboembolism || FinnGen-R9-I9_VTE	CD4-CD8- Natural Killer T %lymphocyte	Weighted median	25	-0.0208172	0.0243306	0.392221	0.979398	0.933789	1.02724
Venous thromboembolism || FinnGen-R9-I9_VTE	CD4-CD8- Natural Killer T %lymphocyte	Inverse variance weighted	25	-0.0354319	0.0175183	0.0431177	0.965188	0.93261	0.998905
Venous thromboembolism || FinnGen-R9-I9_VTE	CD4-CD8- Natural Killer T %lymphocyte	Simple mode	25	-0.0158786	0.0441018	0.721964	0.984247	0.902742	1.07311
Venous thromboembolism || FinnGen-R9-I9_VTE	CD4-CD8- Natural Killer T %lymphocyte	Weighted mode	25	-0.0106192	0.0339301	0.757004	0.989437	0.925777	1.05747
Venous thromboembolism || FinnGen-R9-I9_VTE	CD3- lymphocyte Absolute Count	MR Egger	12	0.121469	0.0438134	0.0197053	1.12915	1.03624	1.2304
Venous thromboembolism || FinnGen-R9-I9_VTE	CD3- lymphocyte Absolute Count	Weighted median	12	0.0877534	0.0328056	0.00747403	1.09172	1.02373	1.16422
Venous thromboembolism || FinnGen-R9-I9_VTE	CD3- lymphocyte Absolute Count	Inverse variance weighted	12	0.0639791	0.0244326	0.00882928	1.06607	1.01622	1.11836
Venous thromboembolism || FinnGen-R9-I9_VTE	CD3- lymphocyte Absolute Count	Simple mode	12	0.0876528	0.0580108	0.158976	1.09161	0.974288	1.22306
Venous thromboembolism || FinnGen-R9-I9_VTE	CD3- lymphocyte Absolute Count	Weighted mode	12	0.0942438	0.0433314	0.0523236	1.09883	1.00936	1.19623
Venous thromboembolism || FinnGen-R9-I9_VTE	IgD+ CD24- B cell %B cell	MR Egger	17	-0.00517742	0.0198866	0.798136	0.994836	0.956805	1.03438
Venous thromboembolism || FinnGen-R9-I9_VTE	IgD+ CD24- B cell %B cell	Weighted median	17	0.00338906	0.0146731	0.817337	1.00339	0.974949	1.03267
Venous thromboembolism || FinnGen-R9-I9_VTE	IgD+ CD24- B cell %B cell	Inverse variance weighted	17	0.00398173	0.0142962	0.780616	1.00399	0.976248	1.03252
Venous thromboembolism || FinnGen-R9-I9_VTE	IgD+ CD24- B cell %B cell	Simple mode	17	-0.00725074	0.0287827	0.804316	0.992775	0.938319	1.05039
Venous thromboembolism || FinnGen-R9-I9_VTE	IgD+ CD24- B cell %B cell	Weighted mode	17	0.00291103	0.013287	0.829352	1.00292	0.977134	1.02938
Venous thromboembolism || FinnGen-R9-I9_VTE	CD3- lymphocyte %lymphocyte	MR Egger	4	0.130489	0.175651	0.534956	1.13939	0.807521	1.60764
Venous thromboembolism || FinnGen-R9-I9_VTE	CD3- lymphocyte %lymphocyte	Weighted median	4	0.100175	0.0647321	0.121733	1.10536	0.973654	1.25489
Venous thromboembolism || FinnGen-R9-I9_VTE	CD3- lymphocyte %lymphocyte	Inverse variance weighted	4	0.0960615	0.0516041	0.0626722	1.10083	0.99493	1.21799
Venous thromboembolism || FinnGen-R9-I9_VTE	CD3- lymphocyte %lymphocyte	Simple mode	4	0.0235981	0.0899154	0.809966	1.02388	0.858442	1.2212
Venous thromboembolism || FinnGen-R9-I9_VTE	CD3- lymphocyte %lymphocyte	Weighted mode	4	0.132779	0.0787349	0.190305	1.142	0.978689	1.33256
Venous thromboembolism || FinnGen-R9-I9_VTE	Activated & secreting CD4 regulatory T cell %CD4+ T cell	MR Egger	24	-0.00251642	0.00632246	0.694457	0.997487	0.985202	1.00992
Venous thromboembolism || FinnGen-R9-I9_VTE	Activated & secreting CD4 regulatory T cell %CD4+ T cell	Weighted median	24	-0.0065759	0.00695653	0.344514	0.993446	0.979992	1.00708
Venous thromboembolism || FinnGen-R9-I9_VTE	Activated & secreting CD4 regulatory T cell %CD4+ T cell	Inverse variance weighted	24	0.000274558	0.00541707	0.959577	1.00027	0.98971	1.01095
Venous thromboembolism || FinnGen-R9-I9_VTE	Activated & secreting CD4 regulatory T cell %CD4+ T cell	Simple mode	24	0.00765612	0.01201	0.530107	1.00769	0.984242	1.03169
Venous thromboembolism || FinnGen-R9-I9_VTE	Activated & secreting CD4 regulatory T cell %CD4+ T cell	Weighted mode	24	-0.00257607	0.00625543	0.684288	0.997427	0.985273	1.00973
Venous thromboembolism || FinnGen-R9-I9_VTE	CD3- lymphocyte %leukocyte	MR Egger	18	0.0440244	0.0378839	0.262242	1.04501	0.970224	1.12556
Venous thromboembolism || FinnGen-R9-I9_VTE	CD3- lymphocyte %leukocyte	Weighted median	18	0.0568501	0.0247403	0.0215692	1.0585	1.00839	1.11109
Venous thromboembolism || FinnGen-R9-I9_VTE	CD3- lymphocyte %leukocyte	Inverse variance weighted	18	0.0143284	0.0250724	0.567674	1.01443	0.965786	1.06553
Venous thromboembolism || FinnGen-R9-I9_VTE	CD3- lymphocyte %leukocyte	Simple mode	18	0.0543193	0.0452039	0.245972	1.05582	0.966301	1.15364
Venous thromboembolism || FinnGen-R9-I9_VTE	CD3- lymphocyte %leukocyte	Weighted mode	18	0.0507834	0.0289253	0.0971443	1.05209	0.994107	1.11347
Venous thromboembolism || FinnGen-R9-I9_VTE	B cell Absolute Count	MR Egger	26	0.00794207	0.029397	0.789342	1.00797	0.951538	1.06776
Venous thromboembolism || FinnGen-R9-I9_VTE	B cell Absolute Count	Weighted median	26	-0.000292498	0.0232284	0.989953	0.999708	0.955214	1.04627
Venous thromboembolism || FinnGen-R9-I9_VTE	B cell Absolute Count	Inverse variance weighted	26	-0.00167093	0.0162249	0.917974	0.99833	0.967082	1.03059
Venous thromboembolism || FinnGen-R9-I9_VTE	B cell Absolute Count	Simple mode	26	0.0193382	0.0451248	0.671921	1.01953	0.933227	1.11381
Venous thromboembolism || FinnGen-R9-I9_VTE	B cell Absolute Count	Weighted mode	26	-0.0132373	0.0349526	0.708093	0.98685	0.921507	1.05683
Venous thromboembolism || FinnGen-R9-I9_VTE	B cell %CD3- lymphocyte	MR Egger	24	-0.0127633	0.0111479	0.26455	0.987318	0.965979	1.00913
Venous thromboembolism || FinnGen-R9-I9_VTE	B cell %CD3- lymphocyte	Weighted median	24	-0.0179452	0.0124862	0.150661	0.982215	0.958469	1.00655
Venous thromboembolism || FinnGen-R9-I9_VTE	B cell %CD3- lymphocyte	Inverse variance weighted	24	-0.00233243	0.00891224	0.793544	0.99767	0.980394	1.01525
Venous thromboembolism || FinnGen-R9-I9_VTE	B cell %CD3- lymphocyte	Simple mode	24	-0.00110431	0.0216836	0.959823	0.998896	0.957333	1.04226
Venous thromboembolism || FinnGen-R9-I9_VTE	B cell %CD3- lymphocyte	Weighted mode	24	-0.0202189	0.0117279	0.0981274	0.979984	0.957714	1.00277
Venous thromboembolism || FinnGen-R9-I9_VTE	B cell %lymphocyte	MR Egger	30	0.00603461	0.0220791	0.786615	1.00605	0.963444	1.05055
Venous thromboembolism || FinnGen-R9-I9_VTE	B cell %lymphocyte	Weighted median	30	-0.0306347	0.0195467	0.117056	0.96983	0.933377	1.00771
Venous thromboembolism || FinnGen-R9-I9_VTE	B cell %lymphocyte	Inverse variance weighted	30	-0.00903011	0.0129883	0.486898	0.991011	0.966101	1.01656
Venous thromboembolism || FinnGen-R9-I9_VTE	B cell %lymphocyte	Simple mode	30	-0.0490929	0.0405288	0.235556	0.952093	0.879388	1.03081
Venous thromboembolism || FinnGen-R9-I9_VTE	B cell %lymphocyte	Weighted mode	30	-0.039484	0.0340915	0.256242	0.961285	0.899152	1.02771
Venous thromboembolism || FinnGen-R9-I9_VTE	Natural Killer Absolute Count	MR Egger	16	0.0408093	0.0365065	0.282442	1.04165	0.969724	1.11892
Venous thromboembolism || FinnGen-R9-I9_VTE	Natural Killer Absolute Count	Weighted median	16	0.0449878	0.0288752	0.119231	1.04602	0.98846	1.10692
Venous thromboembolism || FinnGen-R9-I9_VTE	Natural Killer Absolute Count	Inverse variance weighted	16	0.047291	0.0225768	0.0362006	1.04843	1.00304	1.09586
Venous thromboembolism || FinnGen-R9-I9_VTE	Natural Killer Absolute Count	Simple mode	16	0.0356089	0.037969	0.363181	1.03625	0.961933	1.11631
Venous thromboembolism || FinnGen-R9-I9_VTE	Natural Killer Absolute Count	Weighted mode	16	0.0323871	0.0266283	0.242677	1.03292	0.98039	1.08826
Venous thromboembolism || FinnGen-R9-I9_VTE	Natural Killer %CD3- lymphocyte	MR Egger	23	0.0127802	0.0117119	0.287541	1.01286	0.989876	1.03638
Venous thromboembolism || FinnGen-R9-I9_VTE	Natural Killer %CD3- lymphocyte	Weighted median	23	0.00296828	0.0122055	0.807858	1.00297	0.979263	1.02726
Venous thromboembolism || FinnGen-R9-I9_VTE	Natural Killer %CD3- lymphocyte	Inverse variance weighted	23	-0.0045469	0.009594	0.635549	0.995463	0.976919	1.01436
Venous thromboembolism || FinnGen-R9-I9_VTE	Natural Killer %CD3- lymphocyte	Simple mode	23	-0.000177924	0.0189782	0.992604	0.999822	0.963315	1.03771
Venous thromboembolism || FinnGen-R9-I9_VTE	Natural Killer %CD3- lymphocyte	Weighted mode	23	0.0111359	0.010107	0.282457	1.0112	0.991364	1.03143
Venous thromboembolism || FinnGen-R9-I9_VTE	Natural Killer %lymphocyte	MR Egger	24	0.023193	0.0183901	0.220457	1.02346	0.987231	1.06103
Venous thromboembolism || FinnGen-R9-I9_VTE	Natural Killer %lymphocyte	Weighted median	24	0.0103594	0.0161095	0.520183	1.01041	0.979008	1.04283
Venous thromboembolism || FinnGen-R9-I9_VTE	Natural Killer %lymphocyte	Inverse variance weighted	24	0.00867145	0.0132191	0.511839	1.00871	0.98291	1.03519
Venous thromboembolism || FinnGen-R9-I9_VTE	Natural Killer %lymphocyte	Simple mode	24	0.0258823	0.0241057	0.294094	1.02622	0.978862	1.07587
Venous thromboembolism || FinnGen-R9-I9_VTE	Natural Killer %lymphocyte	Weighted mode	24	0.0103192	0.0149574	0.497156	1.01037	0.981182	1.04043
Venous thromboembolism || FinnGen-R9-I9_VTE	HLA DR+ Natural Killer Absolute Count	MR Egger	14	-0.00783378	0.0397371	0.847017	0.992197	0.917853	1.07256
Venous thromboembolism || FinnGen-R9-I9_VTE	HLA DR+ Natural Killer Absolute Count	Weighted median	14	-0.0210875	0.0232439	0.364286	0.979133	0.935527	1.02477
Venous thromboembolism || FinnGen-R9-I9_VTE	HLA DR+ Natural Killer Absolute Count	Inverse variance weighted	14	-0.0286474	0.0236295	0.225376	0.971759	0.927779	1.01782
Venous thromboembolism || FinnGen-R9-I9_VTE	HLA DR+ Natural Killer Absolute Count	Simple mode	14	0.0162883	0.0508667	0.753894	1.01642	0.919973	1.12298
Venous thromboembolism || FinnGen-R9-I9_VTE	HLA DR+ Natural Killer Absolute Count	Weighted mode	14	-0.0197244	0.022494	0.396471	0.980469	0.938181	1.02466
Venous thromboembolism || FinnGen-R9-I9_VTE	HLA DR+ Natural Killer %Natural Killer	MR Egger	20	-0.00312611	0.0234451	0.895406	0.996879	0.952106	1.04376
Venous thromboembolism || FinnGen-R9-I9_VTE	HLA DR+ Natural Killer %Natural Killer	Weighted median	20	-0.0215157	0.0192103	0.262709	0.978714	0.942549	1.01627
Venous thromboembolism || FinnGen-R9-I9_VTE	HLA DR+ Natural Killer %Natural Killer	Inverse variance weighted	20	-0.00416501	0.0142691	0.770371	0.995844	0.968378	1.02409
Venous thromboembolism || FinnGen-R9-I9_VTE	HLA DR+ Natural Killer %Natural Killer	Simple mode	20	0.0603301	0.0337004	0.0893731	1.06219	0.994294	1.13472
Venous thromboembolism || FinnGen-R9-I9_VTE	HLA DR+ Natural Killer %Natural Killer	Weighted mode	20	-0.0183756	0.0200814	0.371629	0.981792	0.9439	1.02121
Venous thromboembolism || FinnGen-R9-I9_VTE	IgD+ CD24- B cell Absolute Count	MR Egger	19	0.00345557	0.00769585	0.65909	1.00346	0.988439	1.01871
Venous thromboembolism || FinnGen-R9-I9_VTE	IgD+ CD24- B cell Absolute Count	Weighted median	19	0.0116535	0.00914991	0.202797	1.01172	0.993739	1.03003
Venous thromboembolism || FinnGen-R9-I9_VTE	IgD+ CD24- B cell Absolute Count	Inverse variance weighted	19	0.0157307	0.00739086	0.0333042	1.01586	1.00125	1.03068
Venous thromboembolism || FinnGen-R9-I9_VTE	IgD+ CD24- B cell Absolute Count	Simple mode	19	0.0359527	0.0230509	0.136238	1.03661	0.990815	1.08451
Venous thromboembolism || FinnGen-R9-I9_VTE	IgD+ CD24- B cell Absolute Count	Weighted mode	19	0.0126369	0.00739057	0.104473	1.01272	0.998153	1.02749
Venous thromboembolism || FinnGen-R9-I9_VTE	CD25++ CD4+ T cell Absolute Count	MR Egger	20	0.0137451	0.014739	0.363382	1.01384	0.984971	1.04356
Venous thromboembolism || FinnGen-R9-I9_VTE	CD25++ CD4+ T cell Absolute Count	Weighted median	20	0.0150721	0.0146222	0.302648	1.01519	0.986505	1.0447
Venous thromboembolism || FinnGen-R9-I9_VTE	CD25++ CD4+ T cell Absolute Count	Inverse variance weighted	20	0.0141801	0.0111822	0.204762	1.01428	0.992293	1.03676
Venous thromboembolism || FinnGen-R9-I9_VTE	CD25++ CD4+ T cell Absolute Count	Simple mode	20	-0.0119575	0.0274773	0.668336	0.988114	0.936306	1.04279
Venous thromboembolism || FinnGen-R9-I9_VTE	CD25++ CD4+ T cell Absolute Count	Weighted mode	20	0.0113261	0.0133973	0.408405	1.01139	0.985178	1.0383
Venous thromboembolism || FinnGen-R9-I9_VTE	HLA DR+ Natural Killer %CD3- lymphocyte	MR Egger	18	-0.0325585	0.0267648	0.241447	0.967966	0.918496	1.0201
Venous thromboembolism || FinnGen-R9-I9_VTE	HLA DR+ Natural Killer %CD3- lymphocyte	Weighted median	18	-0.0234206	0.0206558	0.256857	0.976852	0.938093	1.01721
Venous thromboembolism || FinnGen-R9-I9_VTE	HLA DR+ Natural Killer %CD3- lymphocyte	Inverse variance weighted	18	-0.0298423	0.016513	0.070731	0.970599	0.939688	1.00253
Venous thromboembolism || FinnGen-R9-I9_VTE	HLA DR+ Natural Killer %CD3- lymphocyte	Simple mode	18	-0.0447727	0.0379821	0.25472	0.956215	0.887615	1.03012
Venous thromboembolism || FinnGen-R9-I9_VTE	HLA DR+ Natural Killer %CD3- lymphocyte	Weighted mode	18	-0.0265706	0.0198131	0.197545	0.973779	0.936689	1.01234
Venous thromboembolism || FinnGen-R9-I9_VTE	Granulocyte Absolute Count	MR Egger	23	-0.000322107	0.0329761	0.992299	0.999678	0.937109	1.06642
Venous thromboembolism || FinnGen-R9-I9_VTE	Granulocyte Absolute Count	Weighted median	23	-0.00398346	0.0243568	0.870088	0.996024	0.949592	1.04473
Venous thromboembolism || FinnGen-R9-I9_VTE	Granulocyte Absolute Count	Inverse variance weighted	23	-0.0117742	0.0204821	0.565393	0.988295	0.949406	1.02878
Venous thromboembolism || FinnGen-R9-I9_VTE	Granulocyte Absolute Count	Simple mode	23	-0.0132917	0.0437317	0.764031	0.986796	0.905737	1.07511
Venous thromboembolism || FinnGen-R9-I9_VTE	Granulocyte Absolute Count	Weighted mode	23	-0.00381879	0.0253136	0.881462	0.996188	0.947969	1.04686
Venous thromboembolism || FinnGen-R9-I9_VTE	Granulocyte %leukocyte	MR Egger	24	-0.0266831	0.0185851	0.165148	0.97367	0.93884	1.00979
Venous thromboembolism || FinnGen-R9-I9_VTE	Granulocyte %leukocyte	Weighted median	24	-0.0145002	0.0189172	0.443373	0.985604	0.94973	1.02283
Venous thromboembolism || FinnGen-R9-I9_VTE	Granulocyte %leukocyte	Inverse variance weighted	24	-0.016169	0.0128031	0.206625	0.983961	0.959577	1.00896
Venous thromboembolism || FinnGen-R9-I9_VTE	Granulocyte %leukocyte	Simple mode	24	-0.020838	0.0283894	0.470361	0.979378	0.92637	1.03542
Venous thromboembolism || FinnGen-R9-I9_VTE	Granulocyte %leukocyte	Weighted mode	24	-0.0143768	0.0169628	0.405425	0.985726	0.953492	1.01905
Venous thromboembolism || FinnGen-R9-I9_VTE	CD28- CD4-CD8- T cell %CD4-CD8- T cell	MR Egger	26	0.022994	0.0179923	0.213476	1.02326	0.987804	1.05999
Venous thromboembolism || FinnGen-R9-I9_VTE	CD28- CD4-CD8- T cell %CD4-CD8- T cell	Weighted median	26	0.0115667	0.0196813	0.556732	1.01163	0.973353	1.05142
Venous thromboembolism || FinnGen-R9-I9_VTE	CD28- CD4-CD8- T cell %CD4-CD8- T cell	Inverse variance weighted	26	0.0130383	0.0122509	0.287208	1.01312	0.989086	1.03775
Venous thromboembolism || FinnGen-R9-I9_VTE	CD28- CD4-CD8- T cell %CD4-CD8- T cell	Simple mode	26	-0.00102219	0.0327632	0.975358	0.998978	0.936844	1.06523
Venous thromboembolism || FinnGen-R9-I9_VTE	CD28- CD4-CD8- T cell %CD4-CD8- T cell	Weighted mode	26	0.00498441	0.018798	0.793063	1.005	0.968642	1.04272
Venous thromboembolism || FinnGen-R9-I9_VTE	CD28- CD4-CD8- T cell Absolute Count	MR Egger	27	0.0049481	0.0209484	0.815199	1.00496	0.964533	1.04708
Venous thromboembolism || FinnGen-R9-I9_VTE	CD28- CD4-CD8- T cell Absolute Count	Weighted median	27	0.0123822	0.0203347	0.542578	1.01246	0.9729	1.05363
Venous thromboembolism || FinnGen-R9-I9_VTE	CD28- CD4-CD8- T cell Absolute Count	Inverse variance weighted	27	0.00468005	0.013796	0.734435	1.00469	0.977888	1.03223
Venous thromboembolism || FinnGen-R9-I9_VTE	CD28- CD4-CD8- T cell Absolute Count	Simple mode	27	0.000684162	0.0328879	0.983562	1.00068	0.938215	1.06731
Venous thromboembolism || FinnGen-R9-I9_VTE	CD28- CD4-CD8- T cell Absolute Count	Weighted mode	27	0.0105627	0.0197225	0.596813	1.01062	0.972297	1.05045
Venous thromboembolism || FinnGen-R9-I9_VTE	CD28+ CD4-CD8- T cell %T cell	MR Egger	22	0.0388886	0.0258852	0.148633	1.03965	0.988223	1.09376
Venous thromboembolism || FinnGen-R9-I9_VTE	CD28+ CD4-CD8- T cell %T cell	Weighted median	22	0.0362575	0.0232573	0.119002	1.03692	0.990717	1.08528
Venous thromboembolism || FinnGen-R9-I9_VTE	CD28+ CD4-CD8- T cell %T cell	Inverse variance weighted	22	0.0297226	0.0160317	0.06374	1.03017	0.998302	1.06305
Venous thromboembolism || FinnGen-R9-I9_VTE	CD28+ CD4-CD8- T cell %T cell	Simple mode	22	0.0161274	0.0358866	0.657748	1.01626	0.947233	1.09031
Venous thromboembolism || FinnGen-R9-I9_VTE	CD28+ CD4-CD8- T cell %T cell	Weighted mode	22	0.0359141	0.0235387	0.141994	1.03657	0.98983	1.08551
Venous thromboembolism || FinnGen-R9-I9_VTE	CD28+ CD4-CD8- T cell %CD4-CD8- T cell	MR Egger	26	-0.022994	0.0179923	0.213476	0.977268	0.943406	1.01235
Venous thromboembolism || FinnGen-R9-I9_VTE	CD28+ CD4-CD8- T cell %CD4-CD8- T cell	Weighted median	26	-0.0115667	0.0186486	0.535096	0.9885	0.953021	1.0253
Venous thromboembolism || FinnGen-R9-I9_VTE	CD28+ CD4-CD8- T cell %CD4-CD8- T cell	Inverse variance weighted	26	-0.0130383	0.0122509	0.287208	0.987046	0.963628	1.01103
Venous thromboembolism || FinnGen-R9-I9_VTE	CD28+ CD4-CD8- T cell %CD4-CD8- T cell	Simple mode	26	0.00102219	0.0347995	0.9768	1.00102	0.935022	1.07168
Venous thromboembolism || FinnGen-R9-I9_VTE	CD28+ CD4-CD8- T cell %CD4-CD8- T cell	Weighted mode	26	-0.00498441	0.0179349	0.783362	0.995028	0.960658	1.03063
Venous thromboembolism || FinnGen-R9-I9_VTE	CD28+ CD4-CD8- T cell Absolute Count	MR Egger	9	-0.00334159	0.0526314	0.951151	0.996664	0.898976	1.10497
Venous thromboembolism || FinnGen-R9-I9_VTE	CD28+ CD4-CD8- T cell Absolute Count	Weighted median	9	-0.0334961	0.039412	0.395383	0.967059	0.895168	1.04472
Venous thromboembolism || FinnGen-R9-I9_VTE	CD28+ CD4-CD8- T cell Absolute Count	Inverse variance weighted	9	-0.0521915	0.0345903	0.131338	0.949147	0.886931	1.01573
Venous thromboembolism || FinnGen-R9-I9_VTE	CD28+ CD4-CD8- T cell Absolute Count	Simple mode	9	-0.0357108	0.0492879	0.489382	0.964919	0.876065	1.06279
Venous thromboembolism || FinnGen-R9-I9_VTE	CD28+ CD4-CD8- T cell Absolute Count	Weighted mode	9	-0.031409	0.036559	0.415267	0.969079	0.902069	1.04107
Venous thromboembolism || FinnGen-R9-I9_VTE	CD39+ CD4+ T cell %T cell	MR Egger	25	-0.0126902	0.0116865	0.288782	0.98739	0.96503	1.01027
Venous thromboembolism || FinnGen-R9-I9_VTE	CD39+ CD4+ T cell %T cell	Weighted median	25	-0.00963823	0.0101625	0.342919	0.990408	0.970876	1.01033
Venous thromboembolism || FinnGen-R9-I9_VTE	CD39+ CD4+ T cell %T cell	Inverse variance weighted	25	-0.00574528	0.00983945	0.559286	0.994271	0.97528	1.01363
Venous thromboembolism || FinnGen-R9-I9_VTE	CD39+ CD4+ T cell %T cell	Simple mode	25	0.0124136	0.0212948	0.565371	1.01249	0.971102	1.05564
Venous thromboembolism || FinnGen-R9-I9_VTE	CD39+ CD4+ T cell %T cell	Weighted mode	25	-0.00877307	0.00854044	0.314551	0.991265	0.97481	1.008
Venous thromboembolism || FinnGen-R9-I9_VTE	CD39+ CD4+ T cell %CD4+ T cell	MR Egger	20	-0.00543773	0.011328	0.636992	0.994577	0.972738	1.01691
Venous thromboembolism || FinnGen-R9-I9_VTE	CD39+ CD4+ T cell %CD4+ T cell	Weighted median	20	-0.00763986	0.0115043	0.506633	0.992389	0.970263	1.01502
Venous thromboembolism || FinnGen-R9-I9_VTE	CD39+ CD4+ T cell %CD4+ T cell	Inverse variance weighted	20	-0.00102632	0.00891905	0.908389	0.998974	0.981663	1.01659
Venous thromboembolism || FinnGen-R9-I9_VTE	CD39+ CD4+ T cell %CD4+ T cell	Simple mode	20	-0.0056308	0.024324	0.819407	0.994385	0.94809	1.04294
Venous thromboembolism || FinnGen-R9-I9_VTE	CD39+ CD4+ T cell %CD4+ T cell	Weighted mode	20	-0.00693492	0.0100946	0.500386	0.993089	0.973634	1.01293
Venous thromboembolism || FinnGen-R9-I9_VTE	CD25++ CD4+ T cell %CD4+ T cell	MR Egger	19	0.0173639	0.0232972	0.466259	1.01752	0.972098	1.06506
Venous thromboembolism || FinnGen-R9-I9_VTE	CD25++ CD4+ T cell %CD4+ T cell	Weighted median	19	0.0102823	0.0196857	0.601444	1.01034	0.972095	1.05008
Venous thromboembolism || FinnGen-R9-I9_VTE	CD25++ CD4+ T cell %CD4+ T cell	Inverse variance weighted	19	0.0254677	0.0163178	0.118586	1.02579	0.993506	1.05913
Venous thromboembolism || FinnGen-R9-I9_VTE	CD25++ CD4+ T cell %CD4+ T cell	Simple mode	19	0.0033076	0.0314124	0.917305	1.00331	0.943404	1.06703
Venous thromboembolism || FinnGen-R9-I9_VTE	CD25++ CD4+ T cell %CD4+ T cell	Weighted mode	19	0.0164001	0.0179347	0.372576	1.01654	0.981423	1.0529
Venous thromboembolism || FinnGen-R9-I9_VTE	CD24+ CD27+ B cell %B cell	MR Egger	23	0.00563047	0.0214295	0.795309	1.00565	0.964282	1.04879
Venous thromboembolism || FinnGen-R9-I9_VTE	CD24+ CD27+ B cell %B cell	Weighted median	23	0.00148716	0.0181867	0.934828	1.00149	0.966418	1.03783
Venous thromboembolism || FinnGen-R9-I9_VTE	CD24+ CD27+ B cell %B cell	Inverse variance weighted	23	-0.000250924	0.0137468	0.985437	0.999749	0.973172	1.02705
Venous thromboembolism || FinnGen-R9-I9_VTE	CD24+ CD27+ B cell %B cell	Simple mode	23	-0.0172789	0.0324917	0.600197	0.982869	0.922228	1.0475
Venous thromboembolism || FinnGen-R9-I9_VTE	CD24+ CD27+ B cell %B cell	Weighted mode	23	0.00468496	0.0184858	0.802285	1.0047	0.968945	1.04177
Venous thromboembolism || FinnGen-R9-I9_VTE	CD39+ CD4+ T cell Absolute Count	MR Egger	26	-0.00786449	0.0121283	0.522855	0.992166	0.968859	1.01603
Venous thromboembolism || FinnGen-R9-I9_VTE	CD39+ CD4+ T cell Absolute Count	Weighted median	26	-0.00460801	0.0125319	0.713095	0.995403	0.971251	1.02015
Venous thromboembolism || FinnGen-R9-I9_VTE	CD39+ CD4+ T cell Absolute Count	Inverse variance weighted	26	-0.00419718	0.00874927	0.631428	0.995812	0.97888	1.01304
Venous thromboembolism || FinnGen-R9-I9_VTE	CD39+ CD4+ T cell Absolute Count	Simple mode	26	0.00383516	0.0215205	0.859995	1.00384	0.962381	1.04709
Venous thromboembolism || FinnGen-R9-I9_VTE	CD39+ CD4+ T cell Absolute Count	Weighted mode	26	-0.00990858	0.0106088	0.359238	0.99014	0.969765	1.01094
Venous thromboembolism || FinnGen-R9-I9_VTE	CD28- CD8dim T cell %T cell	MR Egger	20	-0.0115249	0.0225556	0.615594	0.988541	0.945791	1.03322
Venous thromboembolism || FinnGen-R9-I9_VTE	CD28- CD8dim T cell %T cell	Weighted median	20	0.00451987	0.020824	0.828168	1.00453	0.964356	1.04638
Venous thromboembolism || FinnGen-R9-I9_VTE	CD28- CD8dim T cell %T cell	Inverse variance weighted	20	-0.000634665	0.0149852	0.966217	0.999366	0.97044	1.02915
Venous thromboembolism || FinnGen-R9-I9_VTE	CD28- CD8dim T cell %T cell	Simple mode	20	-0.0373747	0.0393535	0.354181	0.963315	0.891805	1.04056
Venous thromboembolism || FinnGen-R9-I9_VTE	CD28- CD8dim T cell %T cell	Weighted mode	20	-0.000808635	0.0179975	0.964632	0.999192	0.96456	1.03507
Venous thromboembolism || FinnGen-R9-I9_VTE	CD28- CD8dim T cell %CD8dim T cell	MR Egger	13	0.0017242	0.00568575	0.767358	1.00173	0.990624	1.01295
Venous thromboembolism || FinnGen-R9-I9_VTE	CD28- CD8dim T cell %CD8dim T cell	Weighted median	13	0.00122943	0.0061215	0.840825	1.00123	0.989289	1.01332
Venous thromboembolism || FinnGen-R9-I9_VTE	CD28- CD8dim T cell %CD8dim T cell	Inverse variance weighted	13	0.0014603	0.00525232	0.780989	1.00146	0.991205	1.01182
Venous thromboembolism || FinnGen-R9-I9_VTE	CD28- CD8dim T cell %CD8dim T cell	Simple mode	13	0.00542902	0.0274165	0.846344	1.00544	0.952841	1.06095
Venous thromboembolism || FinnGen-R9-I9_VTE	CD28- CD8dim T cell %CD8dim T cell	Weighted mode	13	0.000941885	0.00547099	0.866181	1.00094	0.990266	1.01173
Venous thromboembolism || FinnGen-R9-I9_VTE	CD28- CD8dim T cell Absolute Count	MR Egger	24	0.00996084	0.0169555	0.562871	1.01001	0.976997	1.04414
Venous thromboembolism || FinnGen-R9-I9_VTE	CD28- CD8dim T cell Absolute Count	Weighted median	24	0.00347392	0.0158514	0.826528	1.00348	0.972783	1.03515
Venous thromboembolism || FinnGen-R9-I9_VTE	CD28- CD8dim T cell Absolute Count	Inverse variance weighted	24	0.00462521	0.0119004	0.697528	1.00464	0.981474	1.02834
Venous thromboembolism || FinnGen-R9-I9_VTE	CD28- CD8dim T cell Absolute Count	Simple mode	24	0.0308355	0.0262295	0.251778	1.03132	0.979636	1.08572
Venous thromboembolism || FinnGen-R9-I9_VTE	CD28- CD8dim T cell Absolute Count	Weighted mode	24	0.00856686	0.014509	0.560644	1.0086	0.980325	1.0377
Venous thromboembolism || FinnGen-R9-I9_VTE	CD28+ CD45RA+ CD8dim T cell %T cell	MR Egger	33	0.00245651	0.00443378	0.583524	1.00246	0.993786	1.01121
Venous thromboembolism || FinnGen-R9-I9_VTE	CD28+ CD45RA+ CD8dim T cell %T cell	Weighted median	33	0.00299616	0.00545732	0.582994	1.003	0.992329	1.01379
Venous thromboembolism || FinnGen-R9-I9_VTE	CD28+ CD45RA+ CD8dim T cell %T cell	Inverse variance weighted	33	0.00300947	0.00391853	0.442481	1.00301	0.99534	1.01075
Venous thromboembolism || FinnGen-R9-I9_VTE	CD28+ CD45RA+ CD8dim T cell %T cell	Simple mode	33	0.00906068	0.00888775	0.315632	1.0091	0.991676	1.02683
Venous thromboembolism || FinnGen-R9-I9_VTE	CD28+ CD45RA+ CD8dim T cell %T cell	Weighted mode	33	0.00426588	0.00384065	0.274966	1.00427	0.996744	1.01186
Venous thromboembolism || FinnGen-R9-I9_VTE	CD28+ CD45RA+ CD8dim T cell %CD8dim T cell	MR Egger	17	0.00759265	0.00775975	0.343362	1.00762	0.992412	1.02306
Venous thromboembolism || FinnGen-R9-I9_VTE	CD28+ CD45RA+ CD8dim T cell %CD8dim T cell	Weighted median	17	0.0127559	0.0102993	0.215522	1.01284	0.992597	1.03349
Venous thromboembolism || FinnGen-R9-I9_VTE	CD28+ CD45RA+ CD8dim T cell %CD8dim T cell	Inverse variance weighted	17	0.00937669	0.00687087	0.172347	1.00942	0.995918	1.02311
Venous thromboembolism || FinnGen-R9-I9_VTE	CD28+ CD45RA+ CD8dim T cell %CD8dim T cell	Simple mode	17	0.0140816	0.0216095	0.523885	1.01418	0.972123	1.05806
Venous thromboembolism || FinnGen-R9-I9_VTE	CD28+ CD45RA+ CD8dim T cell %CD8dim T cell	Weighted mode	17	0.00990732	0.00809197	0.238546	1.00996	0.994065	1.0261
Venous thromboembolism || FinnGen-R9-I9_VTE	CD28+ CD45RA+ CD8dim T cell Absolute Count	MR Egger	42	0.000323878	0.00327829	0.921795	1.00032	0.993917	1.00677
Venous thromboembolism || FinnGen-R9-I9_VTE	CD28+ CD45RA+ CD8dim T cell Absolute Count	Weighted median	42	0.0031183	0.0036807	0.396881	1.00312	0.995913	1.01039
Venous thromboembolism || FinnGen-R9-I9_VTE	CD28+ CD45RA+ CD8dim T cell Absolute Count	Inverse variance weighted	42	0.00183962	0.00293662	0.531026	1.00184	0.996092	1.00762
Venous thromboembolism || FinnGen-R9-I9_VTE	CD28+ CD45RA+ CD8dim T cell Absolute Count	Simple mode	42	-0.0151711	0.00643634	0.0232744	0.984943	0.972596	0.997447
Venous thromboembolism || FinnGen-R9-I9_VTE	CD28+ CD45RA+ CD8dim T cell Absolute Count	Weighted mode	42	0.00366395	0.00291846	0.216427	1.00367	0.997946	1.00943
Venous thromboembolism || FinnGen-R9-I9_VTE	CD28+ CD45RA- CD8dim T cell %T cell	MR Egger	28	-0.0107088	0.00493179	0.0392145	0.989348	0.979831	0.998958
Venous thromboembolism || FinnGen-R9-I9_VTE	CD28+ CD45RA- CD8dim T cell %T cell	Weighted median	28	-0.00717487	0.00598319	0.230461	0.992851	0.981276	1.00456
Venous thromboembolism || FinnGen-R9-I9_VTE	CD28+ CD45RA- CD8dim T cell %T cell	Inverse variance weighted	28	-0.00598965	0.00461495	0.194329	0.994028	0.985078	1.00306
Venous thromboembolism || FinnGen-R9-I9_VTE	CD28+ CD45RA- CD8dim T cell %T cell	Simple mode	28	-0.00593446	0.0121376	0.628838	0.994083	0.970713	1.01802
Venous thromboembolism || FinnGen-R9-I9_VTE	CD28+ CD45RA- CD8dim T cell %T cell	Weighted mode	28	-0.00898939	0.00438986	0.0504244	0.991051	0.98256	0.999615
Venous thromboembolism || FinnGen-R9-I9_VTE	CD28+ CD45RA- CD8dim T cell %CD8dim T cell	MR Egger	24	-0.0124456	0.00967696	0.211779	0.987632	0.969076	1.00654
Venous thromboembolism || FinnGen-R9-I9_VTE	CD28+ CD45RA- CD8dim T cell %CD8dim T cell	Weighted median	24	-0.0050824	0.0119323	0.670155	0.99493	0.971932	1.01847
Venous thromboembolism || FinnGen-R9-I9_VTE	CD28+ CD45RA- CD8dim T cell %CD8dim T cell	Inverse variance weighted	24	-0.0081298	0.00793885	0.30581	0.991903	0.976588	1.00746
Venous thromboembolism || FinnGen-R9-I9_VTE	CD28+ CD45RA- CD8dim T cell %CD8dim T cell	Simple mode	24	0.0375487	0.019735	0.0696792	1.03826	0.998869	1.07921
Venous thromboembolism || FinnGen-R9-I9_VTE	CD28+ CD45RA- CD8dim T cell %CD8dim T cell	Weighted mode	24	-0.017786	0.0105222	0.104474	0.982371	0.962319	1.00284
Venous thromboembolism || FinnGen-R9-I9_VTE	IgD+ B cell Absolute Count	MR Egger	13	0.0124572	0.0124285	0.337734	1.01254	0.988168	1.0375
Venous thromboembolism || FinnGen-R9-I9_VTE	IgD+ B cell Absolute Count	Weighted median	13	0.0161536	0.0103203	0.11753	1.01628	0.995934	1.03705
Venous thromboembolism || FinnGen-R9-I9_VTE	IgD+ B cell Absolute Count	Inverse variance weighted	13	0.0153927	0.00982342	0.11713	1.01551	0.996146	1.03525
Venous thromboembolism || FinnGen-R9-I9_VTE	IgD+ B cell Absolute Count	Simple mode	13	0.0156109	0.0229171	0.508684	1.01573	0.971119	1.0624
Venous thromboembolism || FinnGen-R9-I9_VTE	IgD+ B cell Absolute Count	Weighted mode	13	0.0156109	0.00964647	0.131565	1.01573	0.996709	1.03512
Venous thromboembolism || FinnGen-R9-I9_VTE	CD25++ CD4+ T cell %T cell	MR Egger	13	0.0137158	0.0216442	0.539234	1.01381	0.971701	1.05774
Venous thromboembolism || FinnGen-R9-I9_VTE	CD25++ CD4+ T cell %T cell	Weighted median	13	0.0212827	0.0211881	0.315154	1.02151	0.979958	1.06483
Venous thromboembolism || FinnGen-R9-I9_VTE	CD25++ CD4+ T cell %T cell	Inverse variance weighted	13	0.00994184	0.0160443	0.535489	1.00999	0.978725	1.04226
Venous thromboembolism || FinnGen-R9-I9_VTE	CD25++ CD4+ T cell %T cell	Simple mode	13	0.0072763	0.0311216	0.819079	1.0073	0.947696	1.07066
Venous thromboembolism || FinnGen-R9-I9_VTE	CD25++ CD4+ T cell %T cell	Weighted mode	13	0.0210956	0.02203	0.357169	1.02132	0.978159	1.06638
Venous thromboembolism || FinnGen-R9-I9_VTE	CD28+ CD45RA- CD8dim T cell Absolute Count	MR Egger	33	-0.000894342	0.003304	0.788427	0.999106	0.992657	1.0056
Venous thromboembolism || FinnGen-R9-I9_VTE	CD28+ CD45RA- CD8dim T cell Absolute Count	Weighted median	33	0.00342846	0.00412734	0.406159	1.00343	0.99535	1.01158
Venous thromboembolism || FinnGen-R9-I9_VTE	CD28+ CD45RA- CD8dim T cell Absolute Count	Inverse variance weighted	33	0.000345247	0.00282534	0.902743	1.00035	0.994821	1.0059
Venous thromboembolism || FinnGen-R9-I9_VTE	CD28+ CD45RA- CD8dim T cell Absolute Count	Simple mode	33	-0.00630364	0.00590779	0.293954	0.993716	0.982276	1.00529
Venous thromboembolism || FinnGen-R9-I9_VTE	CD28+ CD45RA- CD8dim T cell Absolute Count	Weighted mode	33	0.000970046	0.00325596	0.767683	1.00097	0.994603	1.00738
Venous thromboembolism || FinnGen-R9-I9_VTE	CD24+ CD27+ B cell Absolute Count	MR Egger	21	-0.0255111	0.0120111	0.0470237	0.974812	0.952131	0.998033
Venous thromboembolism || FinnGen-R9-I9_VTE	CD24+ CD27+ B cell Absolute Count	Weighted median	21	-0.02534	0.0116132	0.0291099	0.974978	0.953037	0.997425
Venous thromboembolism || FinnGen-R9-I9_VTE	CD24+ CD27+ B cell Absolute Count	Inverse variance weighted	21	-0.0290559	0.0102959	0.00477146	0.971362	0.951957	0.991163
Venous thromboembolism || FinnGen-R9-I9_VTE	CD24+ CD27+ B cell Absolute Count	Simple mode	21	0.0169861	0.0382859	0.662048	1.01713	0.943599	1.09639
Venous thromboembolism || FinnGen-R9-I9_VTE	CD24+ CD27+ B cell Absolute Count	Weighted mode	21	-0.0237526	0.00978011	0.0247087	0.976527	0.957986	0.995427
Venous thromboembolism || FinnGen-R9-I9_VTE	CD39+ CD8+ T cell %T cell	MR Egger	16	-0.0175133	0.0428598	0.689001	0.982639	0.903465	1.06875
Venous thromboembolism || FinnGen-R9-I9_VTE	CD39+ CD8+ T cell %T cell	Weighted median	16	0.0149953	0.0267532	0.575135	1.01511	0.963251	1.06976
Venous thromboembolism || FinnGen-R9-I9_VTE	CD39+ CD8+ T cell %T cell	Inverse variance weighted	16	0.0140591	0.0216704	0.516487	1.01416	0.971985	1.05816
Venous thromboembolism || FinnGen-R9-I9_VTE	CD39+ CD8+ T cell %T cell	Simple mode	16	0.0206599	0.0443492	0.648019	1.02087	0.935883	1.11358
Venous thromboembolism || FinnGen-R9-I9_VTE	CD39+ CD8+ T cell %T cell	Weighted mode	16	0.00460775	0.0269198	0.866381	1.00462	0.952986	1.05905
Venous thromboembolism || FinnGen-R9-I9_VTE	CD39+ CD8+ T cell %CD8+ T cell	MR Egger	17	0.0108132	0.0191356	0.58037	1.01087	0.973661	1.04951
Venous thromboembolism || FinnGen-R9-I9_VTE	CD39+ CD8+ T cell %CD8+ T cell	Weighted median	17	0.00589145	0.0184809	0.749889	1.00591	0.970124	1.04301
Venous thromboembolism || FinnGen-R9-I9_VTE	CD39+ CD8+ T cell %CD8+ T cell	Inverse variance weighted	17	-0.00494671	0.0134741	0.713525	0.995066	0.96913	1.02169
Venous thromboembolism || FinnGen-R9-I9_VTE	CD39+ CD8+ T cell %CD8+ T cell	Simple mode	17	0.0130973	0.0311151	0.679406	1.01318	0.95324	1.0769
Venous thromboembolism || FinnGen-R9-I9_VTE	CD39+ CD8+ T cell %CD8+ T cell	Weighted mode	17	-0.00110006	0.016951	0.94906	0.998901	0.966258	1.03265
Venous thromboembolism || FinnGen-R9-I9_VTE	CD39+ CD8+ T cell Absolute Count	MR Egger	18	-0.00754404	0.0178551	0.678273	0.992484	0.958352	1.02783
Venous thromboembolism || FinnGen-R9-I9_VTE	CD39+ CD8+ T cell Absolute Count	Weighted median	18	0.0113314	0.0169255	0.503187	1.0114	0.978394	1.04551
Venous thromboembolism || FinnGen-R9-I9_VTE	CD39+ CD8+ T cell Absolute Count	Inverse variance weighted	18	0.00609968	0.012394	0.622615	1.00612	0.981972	1.03086
Venous thromboembolism || FinnGen-R9-I9_VTE	CD39+ CD8+ T cell Absolute Count	Simple mode	18	0.032395	0.0296868	0.290398	1.03293	0.974539	1.09481
Venous thromboembolism || FinnGen-R9-I9_VTE	CD39+ CD8+ T cell Absolute Count	Weighted mode	18	-0.00158214	0.0171506	0.927578	0.998419	0.965415	1.03255
Venous thromboembolism || FinnGen-R9-I9_VTE	CD28- CD127- CD25++ CD8+ T cell %T cell	MR Egger	12	0.024911	0.0169643	0.172726	1.02522	0.991696	1.05989
Venous thromboembolism || FinnGen-R9-I9_VTE	CD28- CD127- CD25++ CD8+ T cell %T cell	Weighted median	12	0.0249468	0.0179327	0.164186	1.02526	0.98985	1.06194
Venous thromboembolism || FinnGen-R9-I9_VTE	CD28- CD127- CD25++ CD8+ T cell %T cell	Inverse variance weighted	12	0.0181721	0.0135742	0.180661	1.01834	0.991602	1.0458
Venous thromboembolism || FinnGen-R9-I9_VTE	CD28- CD127- CD25++ CD8+ T cell %T cell	Simple mode	12	-0.0144301	0.0433518	0.745497	0.985674	0.905381	1.07309
Venous thromboembolism || FinnGen-R9-I9_VTE	CD28- CD127- CD25++ CD8+ T cell %T cell	Weighted mode	12	0.0234251	0.0168169	0.191145	1.0237	0.990509	1.05801
Venous thromboembolism || FinnGen-R9-I9_VTE	CD28- CD127- CD25++ CD8+ T cell %CD8+ T cell	MR Egger	13	0.0302829	0.0155337	0.0771838	1.03075	0.999837	1.06261
Venous thromboembolism || FinnGen-R9-I9_VTE	CD28- CD127- CD25++ CD8+ T cell %CD8+ T cell	Weighted median	13	0.0234968	0.0161662	0.146099	1.02378	0.991844	1.05673
Venous thromboembolism || FinnGen-R9-I9_VTE	CD28- CD127- CD25++ CD8+ T cell %CD8+ T cell	Inverse variance weighted	13	0.0115591	0.0120945	0.33921	1.01163	0.987927	1.03589
Venous thromboembolism || FinnGen-R9-I9_VTE	CD28- CD127- CD25++ CD8+ T cell %CD8+ T cell	Simple mode	13	-0.0293603	0.0338749	0.403089	0.971066	0.908687	1.03773
Venous thromboembolism || FinnGen-R9-I9_VTE	CD28- CD127- CD25++ CD8+ T cell %CD8+ T cell	Weighted mode	13	0.0232236	0.0142943	0.13019	1.0235	0.995218	1.05258
Venous thromboembolism || FinnGen-R9-I9_VTE	CD28- CD127- CD25++ CD8+ T cell Absolute Count	MR Egger	22	-0.00309635	0.0131041	0.815612	0.996908	0.97163	1.02284
Venous thromboembolism || FinnGen-R9-I9_VTE	CD28- CD127- CD25++ CD8+ T cell Absolute Count	Weighted median	22	-0.0172144	0.0160123	0.282342	0.982933	0.952563	1.01427
Venous thromboembolism || FinnGen-R9-I9_VTE	CD28- CD127- CD25++ CD8+ T cell Absolute Count	Inverse variance weighted	22	-0.00762174	0.0105514	0.470081	0.992407	0.972094	1.01314
Venous thromboembolism || FinnGen-R9-I9_VTE	CD28- CD127- CD25++ CD8+ T cell Absolute Count	Simple mode	22	-0.0312182	0.0321559	0.342679	0.969264	0.910061	1.03232
Venous thromboembolism || FinnGen-R9-I9_VTE	CD28- CD127- CD25++ CD8+ T cell Absolute Count	Weighted mode	22	-0.00635866	0.0113551	0.581417	0.993662	0.971791	1.01602
Venous thromboembolism || FinnGen-R9-I9_VTE	CD28- CD25++ CD8+ T cell %T cell	MR Egger	7	0.0125038	0.0700941	0.865423	1.01258	0.882602	1.1617
Venous thromboembolism || FinnGen-R9-I9_VTE	CD28- CD25++ CD8+ T cell %T cell	Weighted median	7	-0.0545327	0.0426055	0.200564	0.946928	0.871064	1.0294
Venous thromboembolism || FinnGen-R9-I9_VTE	CD28- CD25++ CD8+ T cell %T cell	Inverse variance weighted	7	-0.0288374	0.0338655	0.394476	0.971574	0.909178	1.03825
Venous thromboembolism || FinnGen-R9-I9_VTE	CD28- CD25++ CD8+ T cell %T cell	Simple mode	7	-0.0597521	0.0586033	0.347255	0.941998	0.839781	1.05666
Venous thromboembolism || FinnGen-R9-I9_VTE	CD28- CD25++ CD8+ T cell %T cell	Weighted mode	7	-0.0592271	0.0578507	0.345425	0.942493	0.841462	1.05565
Venous thromboembolism || FinnGen-R9-I9_VTE	CD28- CD25++ CD8+ T cell %CD8+ T cell	MR Egger	17	0.0064537	0.033623	0.850361	1.00647	0.942285	1.07504
Venous thromboembolism || FinnGen-R9-I9_VTE	CD28- CD25++ CD8+ T cell %CD8+ T cell	Weighted median	17	-0.00710245	0.0254442	0.780139	0.992923	0.944619	1.0437
Venous thromboembolism || FinnGen-R9-I9_VTE	CD28- CD25++ CD8+ T cell %CD8+ T cell	Inverse variance weighted	17	-0.00320762	0.0220194	0.88418	0.996798	0.954693	1.04076
Venous thromboembolism || FinnGen-R9-I9_VTE	CD28- CD25++ CD8+ T cell %CD8+ T cell	Simple mode	17	-0.0190013	0.0408293	0.647928	0.981178	0.905718	1.06292
Venous thromboembolism || FinnGen-R9-I9_VTE	CD28- CD25++ CD8+ T cell %CD8+ T cell	Weighted mode	17	-0.00830349	0.0244688	0.738759	0.991731	0.945291	1.04045
Venous thromboembolism || FinnGen-R9-I9_VTE	CD25++ CD45RA+ CD4 not regulatory T cell Absolute Count	MR Egger	20	0.0136807	0.0202098	0.507057	1.01377	0.974403	1.05474
Venous thromboembolism || FinnGen-R9-I9_VTE	CD25++ CD45RA+ CD4 not regulatory T cell Absolute Count	Weighted median	20	0.00922475	0.0170664	0.588838	1.00927	0.976066	1.0436
Venous thromboembolism || FinnGen-R9-I9_VTE	CD25++ CD45RA+ CD4 not regulatory T cell Absolute Count	Inverse variance weighted	20	0.00340447	0.0134065	0.79954	1.00341	0.977387	1.03013
Venous thromboembolism || FinnGen-R9-I9_VTE	CD25++ CD45RA+ CD4 not regulatory T cell Absolute Count	Simple mode	20	-0.00301263	0.0244532	0.903243	0.996992	0.950335	1.04594
Venous thromboembolism || FinnGen-R9-I9_VTE	CD25++ CD45RA+ CD4 not regulatory T cell Absolute Count	Weighted mode	20	0.0114554	0.0163351	0.491635	1.01152	0.979648	1.04443
Venous thromboembolism || FinnGen-R9-I9_VTE	CD28- CD25++ CD8+ T cell Absolute Count	MR Egger	17	-0.0102051	0.0137977	0.470944	0.989847	0.963437	1.01698
Venous thromboembolism || FinnGen-R9-I9_VTE	CD28- CD25++ CD8+ T cell Absolute Count	Weighted median	17	-0.0181009	0.0157933	0.251749	0.982062	0.952128	1.01294
Venous thromboembolism || FinnGen-R9-I9_VTE	CD28- CD25++ CD8+ T cell Absolute Count	Inverse variance weighted	17	-0.0135863	0.0108731	0.211469	0.986506	0.965704	1.00775
Venous thromboembolism || FinnGen-R9-I9_VTE	CD28- CD25++ CD8+ T cell Absolute Count	Simple mode	17	-0.0124708	0.0274874	0.656143	0.987607	0.935807	1.04227
Venous thromboembolism || FinnGen-R9-I9_VTE	CD28- CD25++ CD8+ T cell Absolute Count	Weighted mode	17	-0.017641	0.0143779	0.23759	0.982514	0.955212	1.0106
Venous thromboembolism || FinnGen-R9-I9_VTE	CD25++ CD8+ T cell %T cell	MR Egger	14	0.0181078	0.0288108	0.541451	1.01827	0.962365	1.07743
Venous thromboembolism || FinnGen-R9-I9_VTE	CD25++ CD8+ T cell %T cell	Weighted median	14	0.0269682	0.0244992	0.270994	1.02734	0.97917	1.07787
Venous thromboembolism || FinnGen-R9-I9_VTE	CD25++ CD8+ T cell %T cell	Inverse variance weighted	14	0.0290978	0.0182293	0.110443	1.02953	0.99339	1.06697
Venous thromboembolism || FinnGen-R9-I9_VTE	CD25++ CD8+ T cell %T cell	Simple mode	14	0.0139505	0.0388461	0.72527	1.01405	0.939706	1.09427
Venous thromboembolism || FinnGen-R9-I9_VTE	CD25++ CD8+ T cell %T cell	Weighted mode	14	0.0247389	0.0278632	0.390743	1.02505	0.970569	1.08258
Venous thromboembolism || FinnGen-R9-I9_VTE	CD20- B cell %B cell	MR Egger	16	0.00128242	0.0250465	0.959888	1.00128	0.953316	1.05166
Venous thromboembolism || FinnGen-R9-I9_VTE	CD20- B cell %B cell	Weighted median	16	0.00319343	0.0178253	0.857818	1.0032	0.968754	1.03887
Venous thromboembolism || FinnGen-R9-I9_VTE	CD20- B cell %B cell	Inverse variance weighted	16	-0.00510307	0.0178491	0.774954	0.99491	0.960706	1.03033
Venous thromboembolism || FinnGen-R9-I9_VTE	CD20- B cell %B cell	Simple mode	16	0.0551165	0.0353376	0.139674	1.05666	0.985954	1.13244
Venous thromboembolism || FinnGen-R9-I9_VTE	CD20- B cell %B cell	Weighted mode	16	0.00627492	0.0179436	0.731424	1.00629	0.971519	1.04232
Venous thromboembolism || FinnGen-R9-I9_VTE	CD25++ CD8+ T cell %CD8+ T cell	MR Egger	19	-0.00111743	0.0276881	0.968278	0.998883	0.94612	1.05459
Venous thromboembolism || FinnGen-R9-I9_VTE	CD25++ CD8+ T cell %CD8+ T cell	Weighted median	19	0.00915727	0.0233387	0.694789	1.0092	0.964075	1.05644
Venous thromboembolism || FinnGen-R9-I9_VTE	CD25++ CD8+ T cell %CD8+ T cell	Inverse variance weighted	19	0.015424	0.0173279	0.373399	1.01554	0.981632	1.05063
Venous thromboembolism || FinnGen-R9-I9_VTE	CD25++ CD8+ T cell %CD8+ T cell	Simple mode	19	0.0116737	0.0337142	0.733165	1.01174	0.947047	1.08086
Venous thromboembolism || FinnGen-R9-I9_VTE	CD25++ CD8+ T cell %CD8+ T cell	Weighted mode	19	0.00737335	0.0232577	0.75487	1.0074	0.962509	1.05439
Venous thromboembolism || FinnGen-R9-I9_VTE	CD25++ CD8+ T cell Absolute Count	MR Egger	17	-0.028604	0.0353776	0.431421	0.971801	0.9067	1.04158
Venous thromboembolism || FinnGen-R9-I9_VTE	CD25++ CD8+ T cell Absolute Count	Weighted median	17	0.0237292	0.0247056	0.336814	1.02401	0.975609	1.07482
Venous thromboembolism || FinnGen-R9-I9_VTE	CD25++ CD8+ T cell Absolute Count	Inverse variance weighted	17	0.0173674	0.0204514	0.395769	1.01752	0.977539	1.05913
Venous thromboembolism || FinnGen-R9-I9_VTE	CD25++ CD8+ T cell Absolute Count	Simple mode	17	0.0105229	0.0392281	0.791935	1.01058	0.93579	1.09134
Venous thromboembolism || FinnGen-R9-I9_VTE	CD25++ CD8+ T cell Absolute Count	Weighted mode	17	0.0183095	0.0292357	0.539968	1.01848	0.961758	1.07854
Venous thromboembolism || FinnGen-R9-I9_VTE	CD127- CD8+ T cell %T cell	MR Egger	13	-0.00617224	0.0621423	0.922668	0.993847	0.879879	1.12258
Venous thromboembolism || FinnGen-R9-I9_VTE	CD127- CD8+ T cell %T cell	Weighted median	13	-0.000141791	0.0304849	0.996289	0.999858	0.941866	1.06142
Venous thromboembolism || FinnGen-R9-I9_VTE	CD127- CD8+ T cell %T cell	Inverse variance weighted	13	-0.000316259	0.0271383	0.990702	0.999684	0.947899	1.0543
Venous thromboembolism || FinnGen-R9-I9_VTE	CD127- CD8+ T cell %T cell	Simple mode	13	0.0234597	0.0421268	0.587843	1.02374	0.942604	1.11185
Venous thromboembolism || FinnGen-R9-I9_VTE	CD127- CD8+ T cell %T cell	Weighted mode	13	0.0145169	0.0332565	0.670215	1.01462	0.950596	1.08296
Venous thromboembolism || FinnGen-R9-I9_VTE	CD127- CD8+ T cell %CD8+ T cell	MR Egger	11	0.00907745	0.0525303	0.866629	1.00912	0.91039	1.11855
Venous thromboembolism || FinnGen-R9-I9_VTE	CD127- CD8+ T cell %CD8+ T cell	Weighted median	11	-0.0271773	0.0396175	0.492718	0.973189	0.90048	1.05177
Venous thromboembolism || FinnGen-R9-I9_VTE	CD127- CD8+ T cell %CD8+ T cell	Inverse variance weighted	11	-0.0380903	0.0299351	0.203221	0.962626	0.907771	1.0208
Venous thromboembolism || FinnGen-R9-I9_VTE	CD127- CD8+ T cell %CD8+ T cell	Simple mode	11	-0.125056	0.0755614	0.128921	0.882448	0.760974	1.02331
Venous thromboembolism || FinnGen-R9-I9_VTE	CD127- CD8+ T cell %CD8+ T cell	Weighted mode	11	0.0510525	0.0768204	0.521355	1.05238	0.905276	1.22338
Venous thromboembolism || FinnGen-R9-I9_VTE	CD127- CD8+ T cell Absolute Count	MR Egger	13	0.00277272	0.0392386	0.944934	1.00278	0.928546	1.08294
Venous thromboembolism || FinnGen-R9-I9_VTE	CD127- CD8+ T cell Absolute Count	Weighted median	13	-0.00568154	0.0230933	0.805663	0.994335	0.950331	1.04038
Venous thromboembolism || FinnGen-R9-I9_VTE	CD127- CD8+ T cell Absolute Count	Inverse variance weighted	13	-0.0130003	0.0193576	0.501845	0.987084	0.950335	1.02525
Venous thromboembolism || FinnGen-R9-I9_VTE	CD127- CD8+ T cell Absolute Count	Simple mode	13	-0.0141606	0.0370172	0.708749	0.985939	0.916939	1.06013
Venous thromboembolism || FinnGen-R9-I9_VTE	CD127- CD8+ T cell Absolute Count	Weighted mode	13	-0.00696737	0.0238136	0.774841	0.993057	0.947771	1.04051
Venous thromboembolism || FinnGen-R9-I9_VTE	CD28- CD8+ T cell %T cell	MR Egger	14	-0.0497315	0.145614	0.738611	0.951485	0.715242	1.26576
Venous thromboembolism || FinnGen-R9-I9_VTE	CD28- CD8+ T cell %T cell	Weighted median	14	-0.00568724	0.0365961	0.876502	0.994329	0.925505	1.06827
Venous thromboembolism || FinnGen-R9-I9_VTE	CD28- CD8+ T cell %T cell	Inverse variance weighted	14	0.0262902	0.0387088	0.497025	1.02664	0.95163	1.10756
Venous thromboembolism || FinnGen-R9-I9_VTE	CD28- CD8+ T cell %T cell	Simple mode	14	-0.0426894	0.0604615	0.492612	0.958209	0.851127	1.07876
Venous thromboembolism || FinnGen-R9-I9_VTE	CD28- CD8+ T cell %T cell	Weighted mode	14	-0.0490011	0.0579765	0.413291	0.95218	0.849901	1.06677
Venous thromboembolism || FinnGen-R9-I9_VTE	CD28- CD8+ T cell %CD8+ T cell	MR Egger	20	0.0609147	0.0405174	0.150073	1.06281	0.981671	1.15065
Venous thromboembolism || FinnGen-R9-I9_VTE	CD28- CD8+ T cell %CD8+ T cell	Weighted median	20	0.0118659	0.026974	0.660008	1.01194	0.959826	1.06688
Venous thromboembolism || FinnGen-R9-I9_VTE	CD28- CD8+ T cell %CD8+ T cell	Inverse variance weighted	20	-0.0254839	0.0198861	0.200021	0.974838	0.937573	1.01358
Venous thromboembolism || FinnGen-R9-I9_VTE	CD28- CD8+ T cell %CD8+ T cell	Simple mode	20	-0.102831	0.0537032	0.0706967	0.902279	0.812134	1.00243
Venous thromboembolism || FinnGen-R9-I9_VTE	CD28- CD8+ T cell %CD8+ T cell	Weighted mode	20	0.0233604	0.0305774	0.454265	1.02364	0.964089	1.08686
Venous thromboembolism || FinnGen-R9-I9_VTE	CD25++ CD45RA+ CD4 not regulatory T cell %CD4+ T cell	MR Egger	23	0.00193126	0.00915252	0.834915	1.00193	0.98412	1.02007
Venous thromboembolism || FinnGen-R9-I9_VTE	CD25++ CD45RA+ CD4 not regulatory T cell %CD4+ T cell	Weighted median	23	0.00766456	0.0109398	0.483543	1.00769	0.986317	1.02953
Venous thromboembolism || FinnGen-R9-I9_VTE	CD25++ CD45RA+ CD4 not regulatory T cell %CD4+ T cell	Inverse variance weighted	23	0.00284096	0.00734348	0.698853	1.00285	0.988514	1.01738
Venous thromboembolism || FinnGen-R9-I9_VTE	CD25++ CD45RA+ CD4 not regulatory T cell %CD4+ T cell	Simple mode	23	0.0139138	0.0185635	0.461482	1.01401	0.97778	1.05158
Venous thromboembolism || FinnGen-R9-I9_VTE	CD25++ CD45RA+ CD4 not regulatory T cell %CD4+ T cell	Weighted mode	23	0.0119444	0.0103831	0.262341	1.01202	0.991629	1.03282
Venous thromboembolism || FinnGen-R9-I9_VTE	CD28- CD8+ T cell Absolute Count	MR Egger	13	-0.144043	0.0807337	0.101971	0.865851	0.739131	1.0143
Venous thromboembolism || FinnGen-R9-I9_VTE	CD28- CD8+ T cell Absolute Count	Weighted median	13	-0.0593249	0.0350039	0.0901118	0.942401	0.879913	1.00933
Venous thromboembolism || FinnGen-R9-I9_VTE	CD28- CD8+ T cell Absolute Count	Inverse variance weighted	13	-0.0154773	0.0286731	0.589346	0.984642	0.930832	1.04156
Venous thromboembolism || FinnGen-R9-I9_VTE	CD28- CD8+ T cell Absolute Count	Simple mode	13	-0.0588106	0.0505792	0.267536	0.942885	0.853896	1.04115
Venous thromboembolism || FinnGen-R9-I9_VTE	CD28- CD8+ T cell Absolute Count	Weighted mode	13	-0.0667796	0.0412232	0.131207	0.935401	0.862796	1.01412
Venous thromboembolism || FinnGen-R9-I9_VTE	CD28+ CD45RA+ CD8+ T cell %T cell	MR Egger	73	0.0020776	0.00207877	0.320977	1.00208	0.998005	1.00617
Venous thromboembolism || FinnGen-R9-I9_VTE	CD28+ CD45RA+ CD8+ T cell %T cell	Weighted median	73	0.00262063	0.00220404	0.234435	1.00262	0.998302	1.00696
Venous thromboembolism || FinnGen-R9-I9_VTE	CD28+ CD45RA+ CD8+ T cell %T cell	Inverse variance weighted	73	0.000790307	0.00165049	0.632058	1.00079	0.997558	1.00403
Venous thromboembolism || FinnGen-R9-I9_VTE	CD28+ CD45RA+ CD8+ T cell %T cell	Simple mode	73	0.00283807	0.00315962	0.372056	1.00284	0.996651	1.00907
Venous thromboembolism || FinnGen-R9-I9_VTE	CD28+ CD45RA+ CD8+ T cell %T cell	Weighted mode	73	0.00194586	0.00233771	0.407948	1.00195	0.997367	1.00655
Venous thromboembolism || FinnGen-R9-I9_VTE	CD28+ CD45RA+ CD8+ T cell %CD8+ T cell	MR Egger	31	-0.00254269	0.00394176	0.523956	0.997461	0.989784	1.0052
Venous thromboembolism || FinnGen-R9-I9_VTE	CD28+ CD45RA+ CD8+ T cell %CD8+ T cell	Weighted median	31	0.00280363	0.0049377	0.57017	1.00281	0.993149	1.01256
Venous thromboembolism || FinnGen-R9-I9_VTE	CD28+ CD45RA+ CD8+ T cell %CD8+ T cell	Inverse variance weighted	31	-1.84237e-05	0.00364209	0.995964	0.999982	0.992869	1.00715
Venous thromboembolism || FinnGen-R9-I9_VTE	CD28+ CD45RA+ CD8+ T cell %CD8+ T cell	Simple mode	31	-0.0107724	0.00856479	0.218184	0.989285	0.972817	1.00603
Venous thromboembolism || FinnGen-R9-I9_VTE	CD28+ CD45RA+ CD8+ T cell %CD8+ T cell	Weighted mode	31	0.00123069	0.00416546	0.769685	1.00123	0.99309	1.00944
Venous thromboembolism || FinnGen-R9-I9_VTE	IgD+ CD38dim B cell %B cell	MR Egger	13	-0.0138645	0.0639293	0.832278	0.986231	0.870084	1.11788
Venous thromboembolism || FinnGen-R9-I9_VTE	IgD+ CD38dim B cell %B cell	Weighted median	13	-0.0258779	0.0338035	0.443951	0.974454	0.911984	1.0412
Venous thromboembolism || FinnGen-R9-I9_VTE	IgD+ CD38dim B cell %B cell	Inverse variance weighted	13	-0.0114874	0.0257648	0.655701	0.988578	0.939896	1.03978
Venous thromboembolism || FinnGen-R9-I9_VTE	IgD+ CD38dim B cell %B cell	Simple mode	13	-0.0395941	0.0510982	0.45342	0.96118	0.869579	1.06243
Venous thromboembolism || FinnGen-R9-I9_VTE	IgD+ CD38dim B cell %B cell	Weighted mode	13	-0.0336505	0.0432438	0.451547	0.966909	0.888333	1.05244
Venous thromboembolism || FinnGen-R9-I9_VTE	IgD- CD38+ B cell Absolute Count	MR Egger	14	-0.00472134	0.0435814	0.915521	0.99529	0.913802	1.08404
Venous thromboembolism || FinnGen-R9-I9_VTE	IgD- CD38+ B cell Absolute Count	Weighted median	14	0.0117873	0.0279886	0.673647	1.01186	0.957844	1.06892
Venous thromboembolism || FinnGen-R9-I9_VTE	IgD- CD38+ B cell Absolute Count	Inverse variance weighted	14	-0.00926497	0.0241304	0.701012	0.990778	0.945009	1.03876
Venous thromboembolism || FinnGen-R9-I9_VTE	IgD- CD38+ B cell Absolute Count	Simple mode	14	0.0225494	0.0395632	0.578423	1.02281	0.94649	1.10527
Venous thromboembolism || FinnGen-R9-I9_VTE	IgD- CD38+ B cell Absolute Count	Weighted mode	14	0.0206662	0.030464	0.509426	1.02088	0.961709	1.08369
Venous thromboembolism || FinnGen-R9-I9_VTE	CD28+ CD45RA+ CD8+ T cell Absolute Count	MR Egger	46	0.0025781	0.003145	0.416779	1.00258	0.99642	1.00878
Venous thromboembolism || FinnGen-R9-I9_VTE	CD28+ CD45RA+ CD8+ T cell Absolute Count	Weighted median	46	0.00362261	0.00345366	0.294214	1.00363	0.996858	1.01045
Venous thromboembolism || FinnGen-R9-I9_VTE	CD28+ CD45RA+ CD8+ T cell Absolute Count	Inverse variance weighted	46	0.00218747	0.00274992	0.426342	1.00219	0.996803	1.00761
Venous thromboembolism || FinnGen-R9-I9_VTE	CD28+ CD45RA+ CD8+ T cell Absolute Count	Simple mode	46	0.00334353	0.0043033	0.441242	1.00335	0.994922	1.01185
Venous thromboembolism || FinnGen-R9-I9_VTE	CD28+ CD45RA+ CD8+ T cell Absolute Count	Weighted mode	46	0.00228515	0.00306639	0.460009	1.00229	0.996282	1.00833
Venous thromboembolism || FinnGen-R9-I9_VTE	CD28+ CD45RA- CD8+ T cell %T cell	MR Egger	22	-0.00611378	0.00666248	0.36974	0.993905	0.98101	1.00697
Venous thromboembolism || FinnGen-R9-I9_VTE	CD28+ CD45RA- CD8+ T cell %T cell	Weighted median	22	-0.00760174	0.00693907	0.273299	0.992427	0.979021	1.00602
Venous thromboembolism || FinnGen-R9-I9_VTE	CD28+ CD45RA- CD8+ T cell %T cell	Inverse variance weighted	22	-0.00801831	0.0058495	0.170447	0.992014	0.980705	1.00345
Venous thromboembolism || FinnGen-R9-I9_VTE	CD28+ CD45RA- CD8+ T cell %T cell	Simple mode	22	-0.0207552	0.0155638	0.196635	0.979459	0.950031	1.0098
Venous thromboembolism || FinnGen-R9-I9_VTE	CD28+ CD45RA- CD8+ T cell %T cell	Weighted mode	22	-0.00708911	0.00535271	0.199605	0.992936	0.982573	1.00341
Venous thromboembolism || FinnGen-R9-I9_VTE	CD28+ CD45RA- CD8+ T cell %CD8+ T cell	MR Egger	21	-0.00387633	0.00508682	0.455396	0.996131	0.986249	1.00611
Venous thromboembolism || FinnGen-R9-I9_VTE	CD28+ CD45RA- CD8+ T cell %CD8+ T cell	Weighted median	21	-0.00514485	0.00623831	0.409531	0.994868	0.982778	1.00711
Venous thromboembolism || FinnGen-R9-I9_VTE	CD28+ CD45RA- CD8+ T cell %CD8+ T cell	Inverse variance weighted	21	-0.00632141	0.00450354	0.160423	0.993699	0.984966	1.00251
Venous thromboembolism || FinnGen-R9-I9_VTE	CD28+ CD45RA- CD8+ T cell %CD8+ T cell	Simple mode	21	-0.00521388	0.0141772	0.716912	0.9948	0.967537	1.02283
Venous thromboembolism || FinnGen-R9-I9_VTE	CD28+ CD45RA- CD8+ T cell %CD8+ T cell	Weighted mode	21	-0.00593424	0.00521977	0.269028	0.994083	0.983965	1.00431
Venous thromboembolism || FinnGen-R9-I9_VTE	CD28+ CD45RA- CD8+ T cell Absolute Count	MR Egger	22	-0.010359	0.00720245	0.165824	0.989694	0.975821	1.00376
Venous thromboembolism || FinnGen-R9-I9_VTE	CD28+ CD45RA- CD8+ T cell Absolute Count	Weighted median	22	-0.00885374	0.00603573	0.142407	0.991185	0.979529	1.00298
Venous thromboembolism || FinnGen-R9-I9_VTE	CD28+ CD45RA- CD8+ T cell Absolute Count	Inverse variance weighted	22	-0.00701785	0.00637526	0.270987	0.993007	0.980676	1.00549
Venous thromboembolism || FinnGen-R9-I9_VTE	CD28+ CD45RA- CD8+ T cell Absolute Count	Simple mode	22	0.0275645	0.0216158	0.216167	1.02795	0.985306	1.07243
Venous thromboembolism || FinnGen-R9-I9_VTE	CD28+ CD45RA- CD8+ T cell Absolute Count	Weighted mode	22	-0.0089733	0.00554727	0.120671	0.991067	0.98035	1.0019
Venous thromboembolism || FinnGen-R9-I9_VTE	CD28- CD4-CD8- T cell %T cell	MR Egger	21	0.0219729	0.0203221	0.293128	1.02222	0.9823	1.06375
Venous thromboembolism || FinnGen-R9-I9_VTE	CD28- CD4-CD8- T cell %T cell	Weighted median	21	0.0115175	0.0204869	0.573987	1.01158	0.971769	1.05303
Venous thromboembolism || FinnGen-R9-I9_VTE	CD28- CD4-CD8- T cell %T cell	Inverse variance weighted	21	0.00889463	0.0135316	0.510973	1.00893	0.982527	1.03605
Venous thromboembolism || FinnGen-R9-I9_VTE	CD28- CD4-CD8- T cell %T cell	Simple mode	21	0.000706453	0.0341999	0.983724	1.00071	0.935826	1.07009
Venous thromboembolism || FinnGen-R9-I9_VTE	CD28- CD4-CD8- T cell %T cell	Weighted mode	21	0.00963564	0.0180385	0.599111	1.00968	0.974608	1.04602
Venous thromboembolism || FinnGen-R9-I9_VTE	CD25++ CD45RA+ CD4 not regulatory T cell %T cell	MR Egger	20	0.00168019	0.00992336	0.867436	1.00168	0.982387	1.02135
Venous thromboembolism || FinnGen-R9-I9_VTE	CD25++ CD45RA+ CD4 not regulatory T cell %T cell	Weighted median	20	0.00619036	0.0106693	0.561777	1.00621	0.985386	1.02747
Venous thromboembolism || FinnGen-R9-I9_VTE	CD25++ CD45RA+ CD4 not regulatory T cell %T cell	Inverse variance weighted	20	0.000943584	0.00760914	0.90131	1.00094	0.986127	1.01598
Venous thromboembolism || FinnGen-R9-I9_VTE	CD25++ CD45RA+ CD4 not regulatory T cell %T cell	Simple mode	20	0.0042644	0.015877	0.791141	1.00427	0.973503	1.03602
Venous thromboembolism || FinnGen-R9-I9_VTE	CD25++ CD45RA+ CD4 not regulatory T cell %T cell	Weighted mode	20	0.0110941	0.00984838	0.273987	1.01116	0.991825	1.03086
Venous thromboembolism || FinnGen-R9-I9_VTE	CD45RA- CD28- CD8+ T cell Absolute Count	MR Egger	281	4.31713e-06	1.06645e-05	0.685924	1	0.999983	1.00003
Venous thromboembolism || FinnGen-R9-I9_VTE	CD45RA- CD28- CD8+ T cell Absolute Count	Weighted median	281	-8.46341e-07	1.2279e-05	0.945049	0.999999	0.999975	1.00002
Venous thromboembolism || FinnGen-R9-I9_VTE	CD45RA- CD28- CD8+ T cell Absolute Count	Inverse variance weighted	281	8.88147e-06	7.59184e-06	0.242053	1.00001	0.999994	1.00002
Venous thromboembolism || FinnGen-R9-I9_VTE	CD45RA- CD28- CD8+ T cell Absolute Count	Simple mode	281	4.23981e-05	2.13593e-05	0.0481209	1.00004	1	1.00008
Venous thromboembolism || FinnGen-R9-I9_VTE	CD45RA- CD28- CD8+ T cell Absolute Count	Weighted mode	281	8.75623e-06	1.23143e-05	0.477637	1.00001	0.999985	1.00003
Venous thromboembolism || FinnGen-R9-I9_VTE	CD45RA- CD28- CD8+ T cell %CD8+ T cell	MR Egger	43	-7.77572e-05	0.000322536	0.810694	0.999922	0.99929	1.00055
Venous thromboembolism || FinnGen-R9-I9_VTE	CD45RA- CD28- CD8+ T cell %CD8+ T cell	Weighted median	43	9.40784e-05	0.000348302	0.787079	1.00009	0.999412	1.00078
Venous thromboembolism || FinnGen-R9-I9_VTE	CD45RA- CD28- CD8+ T cell %CD8+ T cell	Inverse variance weighted	43	-4.64419e-05	0.000266012	0.861406	0.999954	0.999432	1.00048
Venous thromboembolism || FinnGen-R9-I9_VTE	CD45RA- CD28- CD8+ T cell %CD8+ T cell	Simple mode	43	0.000190333	0.00054051	0.726497	1.00019	0.999131	1.00125
Venous thromboembolism || FinnGen-R9-I9_VTE	CD45RA- CD28- CD8+ T cell %CD8+ T cell	Weighted mode	43	0.00012404	0.000317939	0.698407	1.00012	0.999501	1.00075
Venous thromboembolism || FinnGen-R9-I9_VTE	CD45RA- CD28- CD8+ T cell %T cell	MR Egger	142	-0.000368899	0.000292934	0.210007	0.999631	0.999057	1.00021
Venous thromboembolism || FinnGen-R9-I9_VTE	CD45RA- CD28- CD8+ T cell %T cell	Weighted median	142	-0.000244407	0.000329361	0.458049	0.999756	0.99911	1.0004
Venous thromboembolism || FinnGen-R9-I9_VTE	CD45RA- CD28- CD8+ T cell %T cell	Inverse variance weighted	142	-7.57158e-05	0.000225172	0.736677	0.999924	0.999483	1.00037
Venous thromboembolism || FinnGen-R9-I9_VTE	CD45RA- CD28- CD8+ T cell %T cell	Simple mode	142	0.000144744	0.000605773	0.811499	1.00014	0.998958	1.00133
Venous thromboembolism || FinnGen-R9-I9_VTE	CD45RA- CD28- CD8+ T cell %T cell	Weighted mode	142	-0.000125465	0.000268731	0.641308	0.999875	0.999348	1.0004
Venous thromboembolism || FinnGen-R9-I9_VTE	CD45RA+ CD28- CD8+ T cell Absolute Count	MR Egger	543	1.15447e-05	4.98514e-06	0.0209412	1.00001	1	1.00002
Venous thromboembolism || FinnGen-R9-I9_VTE	CD45RA+ CD28- CD8+ T cell Absolute Count	Weighted median	543	4.50419e-06	5.92934e-06	0.447468	1	0.999993	1.00002
Venous thromboembolism || FinnGen-R9-I9_VTE	CD45RA+ CD28- CD8+ T cell Absolute Count	Inverse variance weighted	543	7.43352e-06	3.68113e-06	0.0434499	1.00001	1	1.00001
Venous thromboembolism || FinnGen-R9-I9_VTE	CD45RA+ CD28- CD8+ T cell Absolute Count	Simple mode	543	9.49045e-07	1.16913e-05	0.935332	1	0.999978	1.00002
Venous thromboembolism || FinnGen-R9-I9_VTE	CD45RA+ CD28- CD8+ T cell Absolute Count	Weighted mode	543	1.28231e-05	7.13936e-06	0.0730332	1.00001	0.999999	1.00003
Venous thromboembolism || FinnGen-R9-I9_VTE	CD45RA+ CD28- CD8+ T cell %CD8+ T cell	MR Egger	24	0.000299327	0.00044395	0.507184	1.0003	0.999429	1.00117
Venous thromboembolism || FinnGen-R9-I9_VTE	CD45RA+ CD28- CD8+ T cell %CD8+ T cell	Weighted median	24	0.000188129	0.000438819	0.66813	1.00019	0.999328	1.00105
Venous thromboembolism || FinnGen-R9-I9_VTE	CD45RA+ CD28- CD8+ T cell %CD8+ T cell	Inverse variance weighted	24	0.000279126	0.000386556	0.470242	1.00028	0.999522	1.00104
Venous thromboembolism || FinnGen-R9-I9_VTE	CD45RA+ CD28- CD8+ T cell %CD8+ T cell	Simple mode	24	0.000419045	0.000963917	0.667809	1.00042	0.998531	1.00231
Venous thromboembolism || FinnGen-R9-I9_VTE	CD45RA+ CD28- CD8+ T cell %CD8+ T cell	Weighted mode	24	0.000129886	0.000391706	0.7432	1.00013	0.999362	1.0009
Venous thromboembolism || FinnGen-R9-I9_VTE	CD20- B cell Absolute Count	MR Egger	14	0.0166425	0.0130961	0.227883	1.01678	0.991015	1.04322
Venous thromboembolism || FinnGen-R9-I9_VTE	CD20- B cell Absolute Count	Weighted median	14	0.0137619	0.0127132	0.279034	1.01386	0.988906	1.03944
Venous thromboembolism || FinnGen-R9-I9_VTE	CD20- B cell Absolute Count	Inverse variance weighted	14	0.010514	0.0108413	0.332141	1.01057	0.989322	1.03227
Venous thromboembolism || FinnGen-R9-I9_VTE	CD20- B cell Absolute Count	Simple mode	14	-0.00190013	0.0426296	0.965125	0.998102	0.918095	1.08508
Venous thromboembolism || FinnGen-R9-I9_VTE	CD20- B cell Absolute Count	Weighted mode	14	0.0131154	0.0122738	0.304707	1.0132	0.989118	1.03787
Venous thromboembolism || FinnGen-R9-I9_VTE	CD45RA+ CD28- CD8+ T cell %T cell	MR Egger	151	0.000760992	0.000232688	0.001334	1.00076	1.0003	1.00122
Venous thromboembolism || FinnGen-R9-I9_VTE	CD45RA+ CD28- CD8+ T cell %T cell	Weighted median	151	0.000374564	0.000237717	0.115102	1.00037	0.999909	1.00084
Venous thromboembolism || FinnGen-R9-I9_VTE	CD45RA+ CD28- CD8+ T cell %T cell	Inverse variance weighted	151	0.000363355	0.000163045	0.0258431	1.00036	1.00004	1.00068
Venous thromboembolism || FinnGen-R9-I9_VTE	CD45RA+ CD28- CD8+ T cell %T cell	Simple mode	151	7.25831e-05	0.000381185	0.849242	1.00007	0.999326	1.00082
Venous thromboembolism || FinnGen-R9-I9_VTE	CD45RA+ CD28- CD8+ T cell %T cell	Weighted mode	151	0.000379851	0.000213701	0.0775149	1.00038	0.999961	1.0008
Venous thromboembolism || FinnGen-R9-I9_VTE	BAFF-R on CD20- CD38- B cell	MR Egger	12	0.00331194	0.0319283	0.919434	1.00332	0.942455	1.06811
Venous thromboembolism || FinnGen-R9-I9_VTE	BAFF-R on CD20- CD38- B cell	Weighted median	12	-0.0184952	0.0223096	0.40709	0.981675	0.939674	1.02555
Venous thromboembolism || FinnGen-R9-I9_VTE	BAFF-R on CD20- CD38- B cell	Inverse variance weighted	12	-0.0317678	0.0183759	0.0838498	0.968731	0.934462	1.00426
Venous thromboembolism || FinnGen-R9-I9_VTE	BAFF-R on CD20- CD38- B cell	Simple mode	12	-0.0250558	0.0340567	0.477302	0.975255	0.912281	1.04258
Venous thromboembolism || FinnGen-R9-I9_VTE	BAFF-R on CD20- CD38- B cell	Weighted mode	12	-0.0201677	0.0238512	0.415811	0.980034	0.935274	1.02694
Venous thromboembolism || FinnGen-R9-I9_VTE	BAFF-R on CD24+ CD27+ B cell	MR Egger	13	-0.00947712	0.0172917	0.594589	0.990568	0.957558	1.02472
Venous thromboembolism || FinnGen-R9-I9_VTE	BAFF-R on CD24+ CD27+ B cell	Weighted median	13	-0.000565837	0.0109656	0.958847	0.999434	0.978183	1.02115
Venous thromboembolism || FinnGen-R9-I9_VTE	BAFF-R on CD24+ CD27+ B cell	Inverse variance weighted	13	-0.00474679	0.0127697	0.710099	0.995264	0.970664	1.02049
Venous thromboembolism || FinnGen-R9-I9_VTE	BAFF-R on CD24+ CD27+ B cell	Simple mode	13	0.0103232	0.0204032	0.622049	1.01038	0.970769	1.0516
Venous thromboembolism || FinnGen-R9-I9_VTE	BAFF-R on CD24+ CD27+ B cell	Weighted mode	13	-0.000367894	0.0109166	0.97367	0.999632	0.978471	1.02125
Venous thromboembolism || FinnGen-R9-I9_VTE	BAFF-R on IgD+ CD24+ B cell	MR Egger	13	-0.0117299	0.0188269	0.545956	0.988339	0.952533	1.02549
Venous thromboembolism || FinnGen-R9-I9_VTE	BAFF-R on IgD+ CD24+ B cell	Weighted median	13	-0.00250815	0.0117326	0.830722	0.997495	0.974818	1.0207
Venous thromboembolism || FinnGen-R9-I9_VTE	BAFF-R on IgD+ CD24+ B cell	Inverse variance weighted	13	-0.00771731	0.0132146	0.55922	0.992312	0.966941	1.01835
Venous thromboembolism || FinnGen-R9-I9_VTE	BAFF-R on IgD+ CD24+ B cell	Simple mode	13	-0.00321453	0.0222813	0.887682	0.996791	0.954196	1.04129
Venous thromboembolism || FinnGen-R9-I9_VTE	BAFF-R on IgD+ CD24+ B cell	Weighted mode	13	-0.00321453	0.0104914	0.764552	0.996791	0.976503	1.0175
Venous thromboembolism || FinnGen-R9-I9_VTE	Switched memory B cell %B cell	MR Egger	11	-0.0348122	0.0522656	0.522075	0.965787	0.87175	1.06997
Venous thromboembolism || FinnGen-R9-I9_VTE	Switched memory B cell %B cell	Weighted median	11	-0.0323685	0.0270361	0.231216	0.96815	0.918182	1.02084
Venous thromboembolism || FinnGen-R9-I9_VTE	Switched memory B cell %B cell	Inverse variance weighted	11	-0.00791207	0.0338267	0.815062	0.992119	0.928475	1.06013
Venous thromboembolism || FinnGen-R9-I9_VTE	Switched memory B cell %B cell	Simple mode	11	-0.0219037	0.0354586	0.550563	0.978334	0.91265	1.04875
Venous thromboembolism || FinnGen-R9-I9_VTE	Switched memory B cell %B cell	Weighted mode	11	-0.0236784	0.026558	0.393568	0.9766	0.927065	1.02878
Venous thromboembolism || FinnGen-R9-I9_VTE	BAFF-R on IgD+ CD24- B cell	MR Egger	21	-0.0258215	0.0139674	0.0801261	0.974509	0.948193	1.00156
Venous thromboembolism || FinnGen-R9-I9_VTE	BAFF-R on IgD+ CD24- B cell	Weighted median	21	-0.017026	0.0169482	0.315094	0.983118	0.950997	1.01632
Venous thromboembolism || FinnGen-R9-I9_VTE	BAFF-R on IgD+ CD24- B cell	Inverse variance weighted	21	-0.00248984	0.0115102	0.828742	0.997513	0.975261	1.02027
Venous thromboembolism || FinnGen-R9-I9_VTE	BAFF-R on IgD+ CD24- B cell	Simple mode	21	-0.0121232	0.0267794	0.655632	0.98795	0.937432	1.04119
Venous thromboembolism || FinnGen-R9-I9_VTE	BAFF-R on IgD+ CD24- B cell	Weighted mode	21	-0.0185356	0.0172951	0.296605	0.981635	0.948917	1.01548
Venous thromboembolism || FinnGen-R9-I9_VTE	BAFF-R on IgD+ CD38- B cell	MR Egger	19	-0.0189576	0.0154048	0.235218	0.981221	0.952037	1.0113
Venous thromboembolism || FinnGen-R9-I9_VTE	BAFF-R on IgD+ CD38- B cell	Weighted median	19	-0.00271826	0.0111648	0.807644	0.997285	0.975699	1.01935
Venous thromboembolism || FinnGen-R9-I9_VTE	BAFF-R on IgD+ CD38- B cell	Inverse variance weighted	19	-0.00306493	0.0126954	0.809228	0.99694	0.972439	1.02206
Venous thromboembolism || FinnGen-R9-I9_VTE	BAFF-R on IgD+ CD38- B cell	Simple mode	19	0.0135552	0.0269231	0.620734	1.01365	0.961545	1.06857
Venous thromboembolism || FinnGen-R9-I9_VTE	BAFF-R on IgD+ CD38- B cell	Weighted mode	19	-0.00376017	0.010981	0.735997	0.996247	0.975034	1.01792
Venous thromboembolism || FinnGen-R9-I9_VTE	BAFF-R on IgD+ CD38- naive B cell	MR Egger	18	0.0341844	0.0368807	0.367754	1.03478	0.962615	1.11235
Venous thromboembolism || FinnGen-R9-I9_VTE	BAFF-R on IgD+ CD38- naive B cell	Weighted median	18	0.00390205	0.0212052	0.854002	1.00391	0.96304	1.04651
Venous thromboembolism || FinnGen-R9-I9_VTE	BAFF-R on IgD+ CD38- naive B cell	Inverse variance weighted	18	-0.0118357	0.0169722	0.485576	0.988234	0.955901	1.02166
Venous thromboembolism || FinnGen-R9-I9_VTE	BAFF-R on IgD+ CD38- naive B cell	Simple mode	18	-0.0144354	0.0305506	0.642573	0.985668	0.928379	1.04649
Venous thromboembolism || FinnGen-R9-I9_VTE	BAFF-R on IgD+ CD38- naive B cell	Weighted mode	18	0.00224702	0.0252564	0.930147	1.00225	0.953844	1.05311
[truncated: 2,855 more rows]

## Sheet: Supplement Table 5
Supplement Table 5. Summary results of 2 sample-MR analyses in 18 immunophenotypes
[truncated: 91 more rows]

[truncated: 1 more sheets: Supplement Table 6]
